# Supplementary material for: Deep Annotation of Populus trichocarpa microRNAs from Diverse Tissue Sets
Source: PLoS One. 2012 Mar 19;7(3):e33034. doi: 10.1371/journal.pone.0033034 (PMC3307732; doi:10.1371/journal.pone.0033034)
Supplement: Table S1 — miRNAs annotated from Pooled sRNA library. (XLSX) [file pone.0033034.s001.xlsx]

## Sheet: Sheet1
Supplemental Table S1
Pooled miRNAs
Alignments of all smallRNA reads and precursor are shown below annotation
miRNA	Sequence	Abundance	Precision	Chromosome	Start	End	Precursor	miRNA*	Orientation	sRNA length	Hairpin Length	Minimum Free Energy	Adjusted MFE	Randfold p-value
ptc-miR1444a	TCCACATTCGGTCAATGTTCC	198	86.46	scaffold_8	9316683	9316703	TTCGAGTTTATCACTTGAATGTTGACCGAATATGGATGAAAAGTTGTTTTCTGTTTCCTTTCCTCCACATTCGGTCAATGTTCCAGTGATGAGCATGAA((((.((((((((((.{{{{{{{{{{{{{{{={{{{=((((.(..(........)..))))).>>>>->>>>>>>>>>>>>>>-)))))))))).))))	GAATGTTGACCGAATATGGAT(2) ATGTTGACCGAATATGGATGA(1)	-	21	99	-43.9	-44.3434	0.009901
ptc-miR1444b	CACATTCGGTCAACGTTCGAG	23	41.07	scaffold_1646	4001	4021	TCGAATATTTCCTTGTTTATCCCTCGAATATTGATCGAATATGTATGAAATATGATGGTTATATGTTTCATTCACATTCGGTCAACGTTCGAGTGATAAACAGAAATAATTGG((((.((((((..(((((({{={{{{{{=={{{{{{{{{{.((.((((((((((.......)))))))))).>>->>>>>>>>>>-->>>>>>.)))))))))))))).))))	TCCCTCGAATATTGATCGAAT(4) CTCGAATATTGATCGAATATG(6) CGAATATTGATCGAATATGTA(6)	-	21	113	-46.4	-41.0619	0.009901
ptc-miR1444c	CACATTCGGTCAACGTTCGAG	23	41.07	scaffold_10	11417656	11417676	TCGAATATTTCCATTTTTATCCCTCGAATATTGATCGAATATGTATGAAATATGATGGTTAAATGTTTCATTCACATTCGGTCAACGTTCGAGTGATAAACAGAAATAATTGG((((.((((((....(((({{={{{{{{=={{{{{{{{{{.((.(((((((((.........))))))))).>>->>>>>>>>>>-->>>>>>.))))))..)))))).))))	TCCCTCGAATATTGATCGAAT(4) CTCGAATATTGATCGAATATG(6) CGAATATTGATCGAATATGTA(6)	+	21	113	-41.8	-36.9911	0.009901
ptc-miR1446a	TGAACTCTCTCCCTCAACCGCT	249	76.62	scaffold_12	11674480	11674501	GGATGTTGAAGATCCAACTTCTTCTGAACTCTCTCCCTCAACCGCTACTCTAGAGCTTGGCAATCCTTGTCGATTGTTTCTGTGTAGCGGTTGAGGTGAGGGGTTCAGAACATGTTGGCTTCGATGATTC(((((((((((..(((((...(((<<<<<<<-<<<<<<<<<<<<<<((.(..((((((((((.....))))))..))))..).))))))))))))).)))))))))))))...)))))))))))).))))	NO	-	22	130	-66.3	-51	0.009901
ptc-miR1446c	TTCTGAACTCTCTCCCTCAAC	42	54.55	scaffold_12	11790908	11790928	GAATGTTGGAAATCCAACTTTTTCTGAACTCTCTCCCTCAACTGCTATTCTAGAGCTTCCTGAGCTAACCCTTGTGTTTCTGTGTAGCAGTCAAGGTGGGAGGCTCAGAAAATGTTGGTTTCTTAGCTTTTC(((.((((((((.(((((.((<<<<<<-<-<<<<<<<<--<<((((((.(..((((....((((......)))).))))..).))))))))..))).)))))).)))))))).))))))))).))))..)))	NO	+	21	132	-47.2	-35.7576	0.009901
ptc-miR1446e	TTCTGAACTCTCTCCCTCAAC	42	54.55	scaffold_15	12482374	12482394	GTATCAGAATGTTGGTGATCCAACTTTTTCTGAACTCTCTCCCTCAACTGCTATTCTAGAGCTTGTTAATCCTTGTCAAGTGTTTCCCTGTAGCAGTCGAGGCGAGGGGGTTTCGGAAAATGTTGGCTCCTCAGCTCTTAATTAC(((.......(((((.((.(((((.((<<<<<<<<<<<<<<<<<<-<<((((((......(((((...........)))))........)))))))).)))).))))))).))))))))).))))).)).))))).......)))	NO	+	21	145	-57.48	-39.6414	0.009901
ptc-miR1447	CAGAATTGCAGTGCCTTGATT	651	89.3	scaffold_13	14548657	14548677	GTGAACGAAGGAGGCCCTAATCAGGGCACTGCAATTCTAAATGTCTGTTGGCAAGTGGCGATGCCAGACGTTTGAAATTTACTTATCATTTATTAGTCAGAATTGCAGTGCCTTGATTTGGGCTTTGTCTGTTCC(.(((((.(.(((((((.(({{{{{{{{{{{{{{{{{{{{{(((((...((((........)))))))))))).......(((...........)))->>>>>>>>>>>>>>>>>>>>.))))))).).))))))	TCAGGGCACTGCAATTCTAAA(24)	+	21	135	-61.3	-45.4074	0.009901
ptc-miR1448	TCTTTCCAACGCCTCCCATACC	7653	80.35	scaffold_8	8028293	8028314	AGGAGCAAGAGGGAAAGGAAAGAGGGTTGCTGGGAGTTACGGGTATGGGAGGATTGGACAGTACTGCTTGGTTTTAATTAACCAAAGTCTGTTCTTTCCAACGCCTCCCATACCGGTAATCTCCAGCTGTTTCCTCCCTTTCCCTTGCTTGTCCT((((.(((((((((((((...(((((..(((((..((({{={{{{{{{{{{{={{{{{={(.((.((((((((......)))).))))..))->>->>>>>-->>>>>>>>>>>.)))))..)))))....))))))))))))))..))))))))	ACGGGTATGGGAGGATTGGACA(6) CGGGTATGGGAGGATTGGACAG(1) GTATGGGAGGATTGGACAGTAC(3) TATGGGAGGATTGGACAGTACT(10)	+	22	155	-84.5	-54.5161	0.009901
ptc-miR156a	TGACAGAAGAGAGTGAGCACA	153	58.4	scaffold_6	19089484	19089504	GAGGGACACAAAAGAAAGACTGACAGAAGAGAGTGAGCACACACGAAAGTATATGGTATGAAGGCATTCCATTGCAGGGTGTGTGCTCACATCTCTTCTGTCAGCTTCCACTTCCAAGTGTTTCCTC(((((((((..(((.(((.(<<<<<<<<<<<<<<<<<<<<<(((....(((.((((.(((....))).)))))))...)))))))))))).))))))))))))))))...)))....))).))))))	NO	-	21	127	-62.7	-49.3701	0.009901
ptc-miR156b	TGACAGAAGAGAGTGAGCACA	153	60.96	scaffold_6	22869969	22869989	AGAATCGAGGGTTTTAAGGGTAAGGGAGGTGACAGAAGAGAGTGAGCACACAGGGTACTTTCTTGCATGACATCCATGCTTGAAACTTTGCGTGCTCACTCTCTATCTGTCACCCCACCACCATCTCTCTCTCTTTCTCTTCCCCTTTCCCTGTCT(((....((((....(((((.((((((((<<<<<<<<<<<<<<<<<<<<-((((((...(((..(((((.....)))))..))))))))).))}}}}}}}}}}}=}}}}}}}}}.....................)))))).))))).)))).)))	GCTCACTCTCTATCTGTCACC(5)	-	21	156	-73.49	-47.109	0.009901
ptc-miR156c	TGACAGAAGAGAGTGAGCACA	153	58.4	scaffold_6	25766678	25766698	TTCTGGACATTAGAAACTGACAGAAGAGAGTGAGCACACAGAGGCATATTTGTATAAATCTATACCATTGCTTTTGCGTGCTCACTTCTCATTCTGTCAGCTTCCAGAG(((((((....((...(<<<<<<<<<<<<<<<<<<<<-((((((((.....(((((....)))))...)))))))).)))))))).)))).))))))))))))))))))	NO	+	21	109	-53.5	-49.0826	0.009901
ptc-miR156d	TGACAGAAGAGAGTGAGCACA	153	60.47	scaffold_18	8350113	8350133	GATTCGAGGGTTTTAAGGGTAAGTGAGTTGACAGAAGAGAGTGAGCACACAGGGTACTTTCTTGCATGACGTTCATGCTTGAAGCTTTGCGTGCCCACCCTCTATCTGTCACCCCATCACCATCTCTCCTTCTCTTCCCCTTTCCTTGCCTGTC(((.((((((....(((((.(((.(((.<<<<<<<<<<<-<<<-<<<<-((((((...(((..(((((.....)))))..))))))))).))}}=}}}=}}}}=}}}}}}}==................))).))).)))))))))))...)))	GCCCACCCTCTATCTGTCACC(1)	+	21	154	-54.61	-35.461	0.009901
ptc-miR156f	TGACAGAAGAGAGTGAGCACA	153	58.4	scaffold_18	12448554	12448574	GAGGGTCACAAGAGAAAGACTGACAGAAGAGAGTGAGCACACACGAAAGCTAATTGTATGAAAGCATACCATTGCAGGGTGTGTGCTCACTTCTCTTCTGTCAGCTTACATTTGCCAGTGTTTCCTC(((((.(((.(((..(((.(<<<<<<<<<<<<<<<<<<<<<(((....((.(((.(((((....))))).)))))...))))}}}}}}}}=}}}}}}}}}}}}))))...)))....)))..)))))	GTGCTCACTTCTCTTCTGTCA(3) TGCTCACTTCTCTTCTGTCAG(3) TGCTCACTTCTCTTCTGTCA(1) GCTCACTTCTCTTCTGTCAGC(2)	-	21	127	-61.6	-48.5039	0.009901
ptc-miR156g	TTGACAGAAGATAGAGAGCAC	386	90.19	scaffold_5	11875605	11875625	TTGAATTATGTGAGGAGGCACTGGTGATGTTGTTGACAGAAGATAGAGAGCACAGATGATGAAATGCATGGAGCTTAATTGCATCTCACTCCTTTGTGCTCTCTAGTCTTCTGTCATCACCTTCAGCCCCTCACTCCGTTTAA((((((...((((((.(((...(((((.....-<<<<<<<<<<<<<<<<<<<<(((.(((((.(((((...........))))).))).)).)))))}}}}}}}=}}}}}}}}}}}}})))....)))))))))...))))))	GCTCTCTAGTCTTCTGTCATC(21) GCTCTCTAGTCTTCTGTCAT(1)	-	21	143	-68.7	-48.042	0.009901
ptc-miR156h	TTGACAGAAGATAGAGAGCAC	386	84.46	scaffold_4	7938904	7938924	GTGAAGGAGGCACTGGTGATGCTGTTGACAGAAGATAGAGAGCACTGACGATGAAATGCATGGAGCTTAATTGCATCTCACTCCTTTGTGCTCTCTAGTCTTCTGTCATCACCTTCAGCCCTTCAC(((((((..((...(((((.....-<<<<<<<<<<<<<<<<<<<<.((.(((((.(((((...........))))).))).)).)).))}}}}}}}=}}}}}}}}}}}}})))....)))))))))	GCTCTCTAGTCTTCTGTCATC(21) GCTCTCTAGTCTTCTGTCAT(1)	-	21	126	-57.1	-45.3175	0.009901
ptc-miR156i	TTGACAGAAGATAGAGAGCAC	386	90.19	scaffold_12	4332130	4332150	GGGAGTTGTGTGGAGAGGAGGCACTTGTGATGTTGTTGACAGAAGATAGAGAGCACAGATGATGTTTTGCAGTAGACTCTGGATCTCACTCCTTTGTGCTCTCTATGCTTCTGCCATCACCTTCAGCCCCGACCCCCAGTCCCC(((..(((.(.((...((.(((....((((((...--<-<<<<<<<<<<<<<<<<<(((.((((...(.(((......))).)...)).)).)))))))))))))).))))))))))))).....)))))...))))))..)))	NO	-	21	144	-57.7	-40.0694	0.009901
ptc-miR156j	TTGACAGAAGATAGAGAGCAC	386	90.19	scaffold_15	4013709	4013729	GGGGGAGAAGGAGGCACTGGTGATGTTGTTGACAGAAGATAGAGAGCACAGATGATGATATGCAATGGACTCTGCATCCCACTCCTTTGTGCTCTCTATGCTTCTGTCATCACTTTCAGCCCCGACCCCCTCCTCCTCCTCCTCC(((((((.((((((....((((..((((-<<<<<<<<<<<<<<<<<<<<(((.((((..(((((........)))))..)).)).)))}}}}}}}}}}}=}}}}}}}}}.......))))..).)))....)))))).)))))))	GTGCTCTCTATGCTTCTGTCA(1) GCTCTCTATGCTTCTGTCATC(106) GCTCTCTATGCTTCTGTCAT(5)	+	21	145	-71.4	-49.2414	0.009901
ptc-miR160a	TGCCTGGCTCCCTGTATGCCA	21	56.76	scaffold_1	43414069	43414089	AGAAGAAGGTGACATGGGTTATGCCTGGCTCCCTGTATGCCACAAGCAAAGACCAATCTTTTGTTTTAGATTGGCTGTTGCCGGTGGCGTGCGAGGAGCCAAGCATACTCTCTCTTTCTCT(((.(((((.((...((((.(<<<-<<<<<<<-<<<<<<<<<(..((((((.(((((((........))))))))).))))..)))}}}}}}}=}}}}}}}=}}}}}))))).))))))))	GCGTGCGAGGAGCCAAGCATA(9)	+	21	121	-62.4	-51.5702	0.009901
ptc-miR160d	TGCCTGGCTCCCTGTATGCCA	21	56.76	scaffold_11	17793905	17793925	GCATCGAAGAAGGAGGTGAAATGGGTTATGCCTGGCTCCCTGTATGCCACAGCAAAGACCAATCTCTTCTGTCTTAGATTGGCTGCTGCCGGTGGCGTGCGAGGAGCCAAGCATACTCTCTCCTTTCTATCTCTATGT((((.((.((((((((.((...((((.(<<<-<<<<<<<-<<<<<<<<<(.(((.((.(((((((..........)))))))))..)))..)))}}}}}}}=}}}}}}}=}}}}})))..)))))))).)))).))))	GCGTGCGAGGAGCCAAGCATA(9)	-	21	138	-63.4	-45.942	0.009901
ptc-miR162a	TCGATAAACCTCTGCATCCAG	166	90.22	scaffold_12	5079402	5079422	GGTGGTTGGGAAGACACTGGAGGCAGCGGTTCATCGATCTCTTCCTGGCCAATTTTTTGTTTAGCACGAAAAACATGAACCGATCGATAAACCTCTGCATCCAGCGCTTCCTTTATTCCCC((.((..((((((.(.(((((.((((.((((.(((((((..(((.((.....((((((((.....)))))))))).)))..))>>>>>->>>>->>>>->>>>>.))))))).....))))	NO	+	21	121	-48.4	-40	0.009901
ptc-miR162b	TCGATAAACCTCTGCATCCAG	166	76.85	scaffold_15	6727328	6727348	ATGTAAAGAAGAGATTGCTTTTGAGTTTGGTTGAGAAGACACTGGAGGCAGCGGTTCATCGATCTTTTCCTGAAGATTTTTTTGTTTTACACGAACAACACGAACCGATCGATAAACCTCTGCATCCAGTGCTTCCCTTACTCCACTTTTTTTTCTTTTCAT(((.((((((((((..(.....((((..((....((((.(((((((.((((.((((.(((((((..(((.((.........((((((.....)))))))).)))..))>>>>>->>>>->>>>->>>>>))))))))..))))..)..)))))))))).)))	NO	+	21	162	-56.2	-34.6914	0.009901
ptc-miR164a	TGGAGAAGCAGGGCACGTGCA	37	90.24	scaffold_2	16570537	16570557	GGGCGAGCGGTTCCTTGCTGGAGAAGCAGGGCACGTGCAAAATCCTGATGAAGTGCTTACACTTTGCACGCGCTCTTCTTCTCCAACACGGGCTCCTCACCT(((.(((.(((.((.((.<<<<<<<<-<<<<<-<<<<<<(...........((((....)))))))}}}}=}}}}}=}}}}}}}}=}).))))).))).)))	CACGCGCTCTTCTTCTCCAAC(4)	+	21	102	-46.9	-45.9804	0.009901
ptc-miR164d	TGGAGAAGCAGGGCACGTGCA	37	90.24	scaffold_14	9081121	9081141	GCCAACCAAGGGAATGGAATTCTGATGGGTGGGTGGCTCACGCTGGAGAAGCAGGGCACGTGCAAAATCCTTCTCGGCTTCCAGATGCTGATGAAGCACTCTTTGCACGTGCTCCCCTCCTCCAACATGAGTTCCTCACCCCTGTCTCTCTTCAGTCTCCATTGCTGAAAGC((.......((.((((((...((((.(((((((..(((((.(.<<<<<-<<--<<<<<<<<<<<((...(((((((((........))))).)))).....)))))))))))))..)).))))).).)))))..)))))))..........))))..)))))).))....))	NO	+	21	172	-75	-43.6047	0.009901
ptc-miR164e	TGGAGAAGCAGGGCACGTGCA	37	82.22	scaffold_16	12933933	12933953	AGGTGTGTGTGAGCAAGATGGAGAAGCAGGGCACGTGCATTACTAACTCATGCACACAGAGTGAGAGAGACATTTCTTGCTGGAGTTATGACTCTTACCTACTATAGATTGTGTTGGCTTCAGCGAGTTAGTTCTTCATGTGCCTGTCTTCCCCATCATGATCACTACCACACCT(((((((.((((.((.((<<<-<<<<--<<<<<<<<<--..((((((((.............((((((....))))))((((((((((..(((((..........)))..))..))))))))))))))))))....}}}}}}}}}==}}}}=}}}}}.)).))))...)))))))	CATGTGCCTGTCTTCCCCATC(7)	+	21	175	-71.3	-40.7429	0.009901
ptc-miR166a	TCGGACCAGGCTTCATTCCCC	2196	90.59	scaffold_1	8837365	8837385	GAAATGGAAGCTATTTCTTTTGAGGGGAATGTTGTCTGGCTCGAGGTCACTAATGGGATCTATGATTTTATCTCAATTGATTGATTTTCTTTTAAATTCTAGTAAATTGAATTGAGAGATATCATGATCAACTTATATTTAATGATGTCGGACCAGGCTTCATTCCCCCCAATTGTTTCTTCCTTTC((((.(((((......(..(((.(({{{{{{=={{{{{{=={{{={(((..((((.((((.(((((....(((((((...(..((((.((..........)).))))..))))))))...)))))))))......))))...)))).>>>-->>>>>>-->>>>>>>>.)))..)...)))))))))	GGAATGTTGTCTGGCTCGAGG(1) GAATGTTGTCTGGCTCGAGGT(1)	+	21	187	-63.8	-34.1176	0.009901
ptc-miR166b	TCGGACCAGGCTTCATTCCCC	2196	90.26	scaffold_2	2744865	2744885	TCTTTCTCCTCTTTCGCATGTATTAACTGTTGAGGGGATTGCTGTCTGGTTCGATGTCATTCATGTGAAGCTTTAACATTAATGTAGTATTGAGTGATTTCGGACCAGGCTTCATTCCCCCCAACTATATTTGTTTAGCATTCGGAGGGTGTAATAAGA((((...(.(((((((.((((...(((.((((.(({{{={{=={{{{{{{{{{{={(((((((.(((..((.(((....))).))..))))))))))).>>>>>>>>>>>-->>->>>>>.)))).......)))..)))).))))))).)....))))	GGATTGCTGTCTGGTTCGATG(3)	+	21	159	-57.8	-36.3522	0.009901
ptc-miR166c	TCGGACCAGGCTTCATTCCCC	2196	90.63	scaffold_2	13513596	13513616	GGGAGCATCTTTTTTTGAGGGGAATGTTGTCTGGCTCGAGGACTCTTTCTTGATCAGTCTGATCAAGTGTTCTATCTTTAGATCTAATATCTTAGATCATGTGTTAGGGTCGTCGGACCAGGCTTCATTCCCCCCAATTATTGCTTCC(((((((....(..(((.(({{{{{{=={{{{{{=={{{={(((((..(((((((.....))))))).............(((((((....))))))).......)))))).>>>-->>>>>>-->>>>>>>>.)))..).)))))))	GGAATGTTGTCTGGCTCGAGG(1)	+	21	148	-67.1	-45.3378	0.009901
ptc-miR166d	TCGGACCAGGCTTCATTCCCC	2196	95.48	scaffold_5	4841700	4841720	GATATGCATGTGCGTGAGTTGAGGGGAATGTTGGCTGGCTCGAAGCTTAAGCAAAGAGTTTTCTCTCAAGAAACAACTGTTAAGGCTTCGGACCAGGCTTCATTCCCCTCAACCAATAAACTTATGTATGCATTTT((.((((((..(((((((((((({{{{{{{=={={{{{=={{{{((((.((((....(((((.......)))))...)))).)))))>>>-->>>>->-->>>>>>>>)))........)))))))))))))).))	GGGAATGTTGGCTGGCTCGAA(3) GGAATGTTGGCTGGCTCGAAG(10)	-	21	136	-59.1	-43.4559	0.009901
ptc-miR166e	TCGGACCAGGCTTCATTCCCC	2196	90.18	scaffold_5	22785321	22785341	CCTCACCCCATCTCTCCCTCTCGCGTATTAACTGTTGAGGGGATTGTCGTCTGGTTCGATGTCATTCATGAGAAGCTCAAACATAAACGTAATATTGAATGATTTCGGACCAGGCTTCATTCCCCCCAACAATGTTTGATTAGCGTTCACAGAATGGATTGAGG(((((..((((.(((......(((.....((((((((.(({{{={{=={{{{{{{{{{{={(((((((.(((...)))..((......)).....)))))))).>>>>>>>>>>>-->>->>>>>.)))))..)))......))).....)))))))..)))))	GGATTGTCGTCTGGTTCGATG(6) GATTGTCGTCTGGTTCGATGT(3)	-	21	164	-63.8	-38.9024	0.009901
ptc-miR166f	TCGGACCAGGCTTCATTCCCC	2196	95.44	scaffold_7	3117092	3117112	AAGGTGTGTGGGTGTGTTGAGGGGAATGTTGGCTGGCTCGAAGCTTAAGCAAAGAGTTTCCTAACATGAAACAACTGTTAAGGCTTCGGACCAGGCTTCATTCCCCTCAAACATACAAGCTTATTTT((((((.((..(((((((((({{{{{{{=={={{{{=={{{{((((.((((....(((((.......)))))...)))).)))))>>>-->>>>->-->>>>>>>>)).)))))))..)).))))))	GGGAATGTTGGCTGGCTCGAA(3) GGAATGTTGGCTGGCTCGAAG(10)	-	21	127	-60.1	-47.3228	0.009901
ptc-miR166h	TCGGACCAGGCTTCATTCCCC	2196	87.42	scaffold_10	9569716	9569736	TGATTGCTACACAGTTGAGGGGAATGCTGTCTGATTCGAGACCATTCACTTTAAGCACACATTCATCTTTCGAATGATCTCGGACCAGGCTTCATTCCCCCCAACTCAAAATCA(((((.......(((((.((((((((..(((((.(((((((.(((((........................))))).))>>>>>->>>>>-->>>>>>>>.)))))...)))))	NO	+	21	114	-43.06	-37.7719	0.009901
ptc-miR166i	TCGGACCAGGCTTCATTCCCC	2196	95.85	scaffold_12	2466425	2466445	GGAAGCTTGTCTTTTGAGGGGAATGTTGTTTGGTTCAAGGCCTGGCCACCCCATGTCTTGGAATTTAAAATATCATGTCCTCGGACCAGGCTTCATTCCCCTCAATTACTGCTTCC((((((..((...((((((((((((..(((((((((.((((.(((.....))).)))).(((...............)))-->>>>>>>>>-->>>>>>>>))))..)).))))))	NO	-	21	116	-50.16	-43.2414	0.009901
ptc-miR166j	TCGGACCAGGCTTCATTCCCC	2196	90.67	scaffold_14	7398300	7398320	GGTAGCTTCTTTTTTGAGGGGAATGTTGTCTGGCTCGAGGACTTTTTGTTCATCAATCTAATCGAACTTTCTACCTGTAGATCTAGTATCTTATTTAAGATTGATCACGTATTAGGGTTGTCGGACCAGGCTTCATTCCCCCCAATCATTGCTTCC((.(((.......(((.(({{{{{{=={{{{{{=={{{={(((((.(((..((((((((((..(((((.((((....))))...))).))....)).)))))))).)))....)))))).>>>-->>>>>>-->>>>>>>>.))).....))).))	GGAATGTTGTCTGGCTCGAGG(1)	+	21	156	-55.3	-35.4487	0.009901
ptc-miR166k	TCGGACCAGGCTTCATTCCCC	2196	90.67	scaffold_14	7412333	7412353	GGTAGCTTCTTTTTTGAGGGGAATGTTGTCTGGCTCGAGGACTTTTTGTTCATCAATCTAATCGAACTTTCTACCTGTAGATCTAGTATCTTATTTAAGATTGATCACGTATTAGGGTTGTCGGACCAGGCTTCATTCCCCCCAATCATTGCTTCC((.(((.......(((.(({{{{{{=={{{{{{=={{{={(((((.(((..((((((((((..(((((.((((....))))...))).))....)).)))))))).)))....)))))).>>>-->>>>>>-->>>>>>>>.))).....))).))	GGAATGTTGTCTGGCTCGAGG(1)	+	21	156	-55.3	-35.4487	0.009901
ptc-miR166l	TCGGACCAGGCTTCATTCCCC	2196	95.85	scaffold_15	541786	541806	GCTAGCTAGGAAGCTTAACTTTTGTGGTGAATGTTGTCTGGTTCAAGGCATGGCCACCACATCTCTTGGTGAATATATGTCCTCGGACCAGGCTTCATTCCCCTCAATTAATGCTTCCATACATGC((......((((((((((...(((.((.(((((..(((((((((.(((((((..(((((.......)))))....)))).))>->>>>>>>>>-->>>>>->>.))))))).))))))......))	NO	-	21	126	-49.2	-39.0476	0.009901
ptc-miR166m	TCGGACCAGGCTTCATTCCCC	2196	92.35	scaffold_15	5751475	5751495	AAGGGCGTGTTGTTTTAGGAAAGTGAGGATGTGGGGGAATGTCGTCTGACTCGAGACAACAGGTAAACTGAAGGAATGGCCGGAGTTTAAGAGTTCTCTCGGACCAGGCTTCATTCCCCTCATCCACACCTTCTCCTCCTCGACCTT((((.((.(..(.....((((.(((.(((((.(({{{{{{{=={{{{{=={{{{{(.(((...((((((...((.....))..))))))...))).))>>>>-->>>>>-->>>>>>>>)))))).))).)))).)..).)).))))	GGGAATGTCGTCTGACTCGAG(1)	-	21	147	-57.8	-39.3197	0.009901
ptc-miR167a	TGAAGCTGCCAGCATGATCTA	277	78.69	scaffold_2	3062256	3062276	TCGTGCACCACTAGCAGTTGAAGCTGCCAGCATGATCTAACTTCCTTGCTTCTTTATCAAGGATGGATTTAGATCATGTGGTGGTTTCACCTGTTGATGGCACCACGG(((((..(((.((((((.<<<<<<--<<<-<<<<<<<<<(((((((((.........)))))).))..)))))))))))))..)))))).)))))).)))...)))))	NO	-	21	108	-49.4	-45.7407	0.009901
ptc-miR167b	TGAAGCTGCCAGCATGATCTA	277	88.5	scaffold_2	3064853	3064873	GTTCACTAGGGAAAAAGTGAAGCTGCCAGCATGATCTATCTTTGGTTAGAGAAAGAAAGGACTAACCCTAGCTAGGTCATGCTGTGACAGCCTCACTCCTTCCTATTTGGGGAC((((.((((((((..((<<<-<<<<<<<<<<<<<<<<<.((..((((((............))))))..)).)))))))))))).).)))).)))))..)))))...)))))))	NO	-	21	114	-49.9	-43.7719	0.009901
ptc-miR167c	TGAAGCTGCCAGCATGATCTA	277	78.47	scaffold_5	22458172	22458192	GTTGATCATCTCTCGTGCACCACTAGCAGTTGAAGCTGCCAGCATGATCTAAATTAACCTCCTTCTTTATCAAGGATGGATTAGATCATGTGGTAGTTTCACCTGCTGATGGCATCACGAAAAAACCCTAGC((((........(((((..(((.((((((.<<<<<<<<<<<-<<<<<<<<<(.....(((((((.......))))).)).))}}}}}}}}}}}}}}}}}}}=}))))).)))...)))))........))))	AGATCATGTGGTAGTTTCACC(26) GATCATGTGGTAGTTTCACC(4)	+	21	132	-53.7	-40.6818	0.009901
ptc-miR167d	TGAAGCTGCCAGCATGATCTA	277	89.07	scaffold_5	22447930	22447950	GTGGTTAAAAGAAGTTCACAAGGGAAAAGGTGAAGCTGCCAGCATGATCTATCTTTGGTTAGAGAAGGATAGAAGCGAAAGAACTAACCCTAGCTAGGTCATGCTCTGACAGCCTCACTCCTTCCTATTTGGGGACCCAT((((.........((((.((((((((..((<<<-<<<<<-<<<<<<<<<<<.((..((((((.............(....)..))))))..)).))}}}}}}}}}==}=}}}}=}}}))..)))))..))).))))))))	GGTCATGCTCTGACAGCCTCA(1)	+	21	140	-47.76	-34.1143	0.009901
ptc-miR167e	TGAAGCTGCCAGCATGATCTG	51	50	scaffold_5	3575889	3575909	GAGCGGATAGACCTAATCATGCACCACTAGTAGTTGAAGCTGCCAGCATGATCTGAACTTTCCTTAATTTTCCTATACGGGAAAGACTAGATCATGTGGTAGTTTCATCTATTGATGGTAGCATGGGAAACCCTAATCAGCTT((((.(((((......((((((((((.((((((.<<<<<<<<<<<-<<<<<<<<<..(((((((..............))))))).=}}}}}}}}}}}}}}}}}}}}.)))))).)))).))))))......)).))).))))	CTAGATCATGTGGTAGTTTCA(1) AGATCATGTGGTAGTTTCATC(1) GATCATGTGGTAGTTTCATC(6)	+	21	143	-61.64	-43.1049	0.009901
ptc-miR167f	TGAAGCTGCCAGCATGATCTTA	260	81.5	scaffold_10	10015971	10015992	TCGTGCACCTCTATCAGTTGAAGCTGCCAGCATGATCTTAGCCTTCCTCCTTTGTTGAGGAAAGAAACAGATCATGTGGCAGTTTCACCTGTTGTTGGTATCACGA(((((.(((..((.(((.<<<<<<<<<<<-<<<<<<<<--.(.((((((.......)))))).)....}}}}}}}}}}}}}}}}}}}=}}).))..)))..)))))	AGATCATGTGGCAGTTTCACCT(3) AGATCATGTGGCAGTTTCACC(173)	-	22	106	-49.1	-46.3208	0.009901
ptc-miR167g	TGAAGCTGCCAGCATGATCTTA	260	81.25	scaffold_8	10561914	10561935	TCGTGCACCACTATCAGTTGAAGCTGCCAGCATGATCTTAACCTCCCTCCTTTGTCGAGGAAAGAACAGATCATGTGGCAGTTTCACCTGAAGTTGGTATCACGA(((((.((((((.((((.<<<<<<<<<<<-<<<<<<<<--.....((((.......)))).......}}}}}}}}}}}}}}}}}}}=}})))).))))..)))))	AGATCATGTGGCAGTTTCACCT(3) AGATCATGTGGCAGTTTCACC(173)	+	22	105	-48.74	-46.419	0.009901
ptc-miR169a	CAGCCAAGGATGACTTGCCGA	569	84.67	scaffold_1	3089924	3089944	GCACAAAGTGGTATGCAGCCAAGGATGACTTGCCGACTTAACTGATCTGTATAAATTAATGCATGTGTAGTCAAAATTACTACTACTATATATTAATCTGATCTGTGACCACAAATTAACTAACTACTAGCTAGTAATTAGTTGGCAAGTTGTCCATGGCTACATGCTGCTTTTTGC(((.((((..(((((-<<<<<-<<<--<<<<<<<<<((..((((....(((...(((((((.(((((((((.......))))).)).)).))))))).((((.(((....))).))))......)))....))))....)))))))))))..))).))))).)))))..)))).)))	NO	-	21	177	-63.3	-35.7627	0.009901
ptc-miR169aa	TCGAGCCAAGAATGACTTGTCG	44	64.71	scaffold_18	14336835	14336856	TCTTGAGTGTCTTCCATGAAAACATAAAGAGTAGAGATCGAGCCAAGAATGACTTGTCGGCAGGCTAGCAATTGCTACGTATAGAGCAATATGTATGCTAGAATGAGTATTCCGCCAGGTCGTTCTTGGCTCAACTTTGCTCTTCGTTTTCTCATGCGAGCCTCTCAAGA(((((((.(.(((.(((((.((.(..((((((((((.--<<<<<<<<<<<<<<<<<-<<(((..((((((((((((.(.....))))))).....))))))..))......))).)))))))))))))))))..))))))))))..).)).))))).))).).)))))))	NO	-	22	170	-77.8	-45.7647	0.009901
ptc-miR169c	CAGCCAAGGATGACTTGCCGA	569	75.56	scaffold_19	4971730	4971750	GCCTTGCATGGAGGCTCATAAAGTTTGATGCAGCCAAGGATGACTTGCCGACGACTCAATTTTTGCTTCCATATGGTAGAAGAGATGAATAGGTTGGCAGGTTTTCCTTGGCTACATTTTCCTTTCTGCTCCTCCTGCTAGGT((((.(((.(((((..((.((((...((((-<<<<<<<<<-<<<<<<<<<<(.(.(((.(((((.((.((....)).))))))).))).)..)))}}}}}}}}=}}}}}}}}}=}}))...)))).))..)))))))).))))	GGCAGGTTTTCCTTGGCTACA(1)	-	21	143	-65.6	-45.8741	0.009901
ptc-miR169d	CAGCCAAGGATGACTTGCCGG	212	83.46	scaffold_6	5569370	5569390	GGTCTAGGAGTTTTGCATGAAGAGGTAGAGAGTCGAATGCAGCCAAGGATGACTTGCCGGCATTTCCTCCTAAGTAGCGAGCCCGGCAAGGCTTCTATTTGGCACGCCCGGCCGGCGGGTTGTCCTTGGCTATATTTGGTTCCCTTCTTCTCATGTGAAACTCCAGGCC(((((.(((((((..(((((.((((.((.((..((((((-<<<<<<<<<--<<<<<<<<<(........((((((((.(((((......)))))))))))))........)))}}}}}}}==}}}}}}}}}=})))))..)).)).)))))))))..))))))))))))	GGCGGGTTGTCCTTGGCTAT(1)	-	21	169	-98.69	-58.3965	0.009901
ptc-miR169g	CAGCCAAGGATGACTTGCCGG	212	83.46	scaffold_414	13080	13100	GGTGTAGGGGTTTTGCATGAAGAGGTAGAGAGTAGAATGCAGCCAAGGATGACTTGCCGGCATTTCCTCCTAGGTAGCTAGCAAGCCTTCTATTTGGCATGCCTGTCCGGCAGGTTGTCCTTGGCTAAATTTTGTTCTCTTCTTCTCATGTGAGACTCCAGGCC(((.(.(((((((..(((((.((((.((((((((((((.-<<<<<<<<<--<<<<<<<<<((...((.....))......(((.(((........))).))).)).)))))))))..)))))))))..)))))))))))).)))))))))..)))))))).)))	NO	+	21	164	-88.2	-53.7805	0.009901
ptc-miR169h	CAGCCAAGGATGACTTGCCGG	212	80.3	scaffold_6	26618439	26618459	GGGGCTTACATGAAGAGGTAGAGAGTGTAATTCAGCCAAGGATGACTTGCCGGCAGCACGGGATCTCAGAGCTTAATAACTAGAAGATCAAGGCTGTCATTACTTTTCCGGCCGGCAAGTTGCCCTTGGCTACATTGTACTCTCTTCTTCTCATGTAAGGCCT(((.(((((((((.((((.((((((((((((.-<<<<<<<<--<<<<<<<<<<((((.(..(((((...((........))...)))))..))))...............)))}}}}}}}}==}}}}}}}}==}))))))))))).))))))))))))).)))	GGCAAGTTGCCCTTGGCTACA(8) GGCAAGTTGCCCTTGGCTAC(4)	+	21	163	-81.16	-49.7914	0.009901
ptc-miR169j	TAGCCAAGGATGACTTGCCTG	69	76.67	scaffold_1	31302265	31302285	TGAGAGGAAGGGAGGCCTTACATGAAGACAAGAGTCTTGTTTGATAGCCAAGGATGACTTGCCTGCTACTTGCAAGAGTTTCTGCAAAGAGATCAGAACCAAATATGCATGGAATTATATGTAATGAAACTCTTGTTTGATTGCCAGGCAGTCTCCTTGGCTAGCCTGACAGGCTCTTCTCTCTCATGCTAGGCCTTCTCTTCTTCCA((.(((((((((((((((..((((((((.((((((((.(((...<<<<<<<<<<-<<<<-<<<<<(..(..(((((((((((......(....)...........((((((......))))))..)))))))))))..)...).)))))))))))))))))))....))))))))))).))).)))))..)…	NO	-	21	208	-98	-47.1154	0.009901
ptc-miR169s	CAGCCAAGGATGACTTGCCGG	212	81.23	scaffold_18	3350295	3350315	TTGCCTTGGGGGCTTGCATGAAGAGGTAGAGAGTGTGATTCAGCCAAGGATGACTTGCCGGCAGCAGGTAAGAGCAAAGCTCCGTTTTTGGAAGTTCAAGGATATCTTAACTTTTCCGGCCGGCAAGCTGTCCTTGGCTACATTGTACTCTCTTCTTCTCATGCAAGAACTACTTGGTAA(((((...((..(((((((((.((((.((((((((..((.-<<<<<<<<<<--<<<<<<<<(....((.(((((..(((....((((((((....))))))))..)))..))))))).))}}}}}}}==}}}}}}}}}}==))..)))))))).)))))))))))))..))....)))))	CGGCAAGCTGTCCTTGGCTAC(1) GGCAAGCTGTCCTTGGCTACA(12)	-	21	180	-91	-50.5556	0.009901
ptc-miR169u	TAGCCAAGGACGACTAGCCTA	53	96.36	scaffold_15	12079420	12079440	GGAAGAGAGGTCTTGTATGAAGATGAAGAGGTAGAGAGTTTGGTAGCCAAGGACGACTAGCCTATTTCCTCCATTGGGTTCTCAAAAGAATGAAATGTCGTTCAGAGCTCACTGGTAGGGTTCATAGGCAGTCTCCTTTGGCTATCCTAACTGGCTCTCATTTTTCATGCTAGACCTACATCTCTTCT(((((((((((((.((((((((((((.(((.(((..((...((<<<<<<<<<<-<<<<-<<<<<(.(((((((.((((((((.....((((((....)))))))))))))).))).))))...))}}}}}}}}}}}=}}}}}}}}}))..))).)))))).))))))))).)))))....))))))))	AGGCAGTCTCCTTTGGCTATC(1) GGCAGTCTCCTTTGGCTATCC(11) GGCAGTCTCCTTTGGCTATC(1)	+	21	188	-89.4	-47.5532	0.009901
ptc-miR169z	CAGCCAAGAATGATTTGCCGG	50	90.91	scaffold_18	14347190	14347210	GGTCTAAGAGATTTGCATGAAGATGTTGATAGTAGAATGCAGCCAAGAATGATTTGCCGGCGCCGGCCAGCACTTGTTGCAAAGCAACTAAGCAAGGGCTTCAAATGTTTTTGGCACCCCGGCAAGTTGTTCTTGGCTACATTTGGATATCTTCTTCTCATGTGAAACTCTATAGACC((((((((((.((..(((((.((....((((...(((((-<<<<<<<<<--<<<<<<<<<.(((((((....((((((((...))))).)))....))))............)))...))}}}}}}}==}}}}}}}}}=}})))...))))....)))))))..)).)))).))))))	GGCAAGTTGTTCTTGGCTACA(1)	-	21	178	-80.7	-45.3371	0.009901
ptc-miR171a	TGATTGAGCCGTGCCAATATC	207	86.25	scaffold_4	764814	764834	GTTTCTTCAGAGAAAACGGGATATTGGTACGGTTCAATCAGAAAGTAATGCTCCCAAAAGTATAGAGTACTATTGTTTGATTGAGCCGTGCCAATATCACGTACACTCATCTTCCTCTCGAGGAAC(((((((.((((.(((((={{{{{{{{{{{{{{{{{{{{(((.((((.(((((...........))))).)))).))>>>>>>>>>>>>>>>>>>>>>.))).........)).)))).)))))))	GGATATTGGTACGGTTCAATC(3)	+	21	126	-54.3	-43.0952	0.009901
ptc-miR171b	TGATTGAGCCGTGCCAATATC	207	85.89	scaffold_21	325798	325818	GTCAACATAATTATATATAACGAGATATTGGTGCGGTTCAATCAGATAGTAATGCTCCATAAGCATAGAGCTCTATTGTTTGATTGAGCCGTGCCAATATCACGTATATGTTGC(.(((((((..........(((.((((((((..((((((((((((((((((..((((.((....)).))))..)))))))>>>>>>>>>>>-->>>>>>>>.))).))))))))	NO	+	21	114	-53.5	-46.9298	0.009901
ptc-miR171c	TTGAGCCGCGCCAATATCACT	7	58.33	scaffold_6	4686636	4686656	GCTGGATGCTAAGGAGGCAAAAGAAAGCGATGTTGGTGAGGTTCAATCCGAAGACGGATTTACACGTGAAAGTAATTGTAAAATACGATCTCAGATTGAGCCGCGCCAATATCACTTTCTCAGGGTTATTTGCTTTCCCAGC(((((.......(((((((((((((((={{{{{{{{{{={{{{{{{{{.((.((((..((((((.((.......))))))))...)).)))).))>>>>>>>->>>>>>>>>>->>))))........))))))))))))))	CGATGTTGGTGAGGTTCAATC(2)	-	21	142	-56.41	-39.7254	0.009901
ptc-miR171d	TTGAGCCGCGCCAATATCACT	7	58.33	scaffold_18	13263748	13263768	GAAAGCGATGTTGGTGAGGTTCAATCCGAAGACAGATTTACACGAGTGAAAGTAAAATCCGATCTCAGATTGAGCCGCGCCAATATCACTTTT(((((={{{{{{{{{{={{{{{{{{{.((.(((.(((((..((........)).))))).).)))).))>>>>>>>->>>>>>>>>>->>)))	CGATGTTGGTGAGGTTCAATC(2)	-	21	93	-37.7	-40.5376	0.009901
ptc-miR171e	TGATTGAGCCGTGCCAATATC	207	86.97	scaffold_1	31797196	31797216	AATTTGATGTTGGCAGAGCTCAATCAAATCAAAGCACTCAATGGTTGGGTTCTTTCATCTGATTGAGCCGTGCCAATATCGCATT(((.(((((((((((..(((((((((.((.((((.(((((.....))))).)))).)).>>>>>>>>>-->>>>>>>>>>).)))	NO	-	21	85	-37.8	-44.4706	0.009901
ptc-miR171f	TGATTGAGCCGTGCCAATATC	207	85.54	scaffold_2	908913	908933	GTGCTTGAAAGTGTCATTGCGATGTTGGCCCGGTTCACTCAGAGAAAAGACACCATTTTTTTTCAAGAAGATCATCAAAGCTTGAAAGAATAATGGTGGTCGGTCGTCTCTGATTGAGCCGTGCCAATATCTTAGTGCTCTTTCATTTAT(((..((((((.(.(((((.(({{{{{{{={{{{{{{={{{{{((...(((((((((((((((((((..(.....)....)))))))))).)))))).))).....))))>>>->>>>>>>->>>>>>>>>.)))))).))))))..)))	TGTTGGCCCGGTTCACTCAGA(4)	+	21	150	-67.5	-45	0.009901
ptc-miR171l	CGAGCCGAATCAATATCACTC	736	95.58	scaffold_15	654676	654696	GGAGAAGTAGACACGGTGTGATATTGGTCCGGCTCATCTTCTGTGCATAAGCATCTGAAGTTCTTCACTCATGAAGACGAGCCGAATCAATATCACTCTTGTATGCTTCTTC(((((((((.(((.((={{{{{{{{{{{={{{{{{==((((.((((....))))..)))).((((((....))))))->>>>>>->>>>>>>>>>>->)))).)))))))))	TGTGATATTGGTCCGGCTCAT(2) TGATATTGGTCCGGCTCATCT(1)	+	21	112	-52.5	-46.875	0.009901
ptc-miR171m	CGAGCCGAATCAATATCACTC	736	95.58	scaffold_12	2197369	2197389	GGAGAAGCAGACATGGCGTGGTATTGATCCGGCTCATCTTCTGTATTTGCATCAGAAGTTCTTCGCTGAAGACGAGCCGAATCAATATCACTCTTGTACGCTTCATTC((((((((..(((.((={{{{{{{{{{{={{{{{{==((((((.........)))))).(((((...)))))->>>>>>->>>>>>>>>>>->))))..))))).)))	CGTGGTATTGATCCGGCTCAT(2)	-	21	108	-45.8	-42.4074	0.009901
ptc-miR171n	CGAGCCGAATCAATATCACTC	736	95.58	scaffold_12	2201537	2201557	TTGGAGAAGCAGACATGGCGTGGTATTGATCCGGCTCTTCTTCTGTATTTGCATCAGAAGTTTTTCGCTGAAGACGAGCCGAATCAATATCACTCTTGTACGCTTCATTCTCTAA((((((((((..(((.((.(((((((((((.((((((.(((((.((....((.......)).....)).)))))->>>>>>->>>>>>>>>>>->))))..)))....)))))))	NO	-	21	115	-45.2	-39.3043	0.009901
ptc-miR172f	AGAATCTTGATGATGCTGCAT	249	73.45	scaffold_4	21285315	21285335	GTCGTTGTTTGCGGGTGCTGCATCACCAAGATTCACATGCAAATGCATGGCCGATGATATATGTTAGAAATTTTTTTTATATAAAAAAGATATCTTTCTTTCTTTCTGATCATCTGCCAAAGTTCTTTGGAAGTGAGAATCTTGATGATGCTGCATCGGCAATAAACGAC((((((..((((.(((((.((((((.((((((((.(((.((((.((.((((.((((((....(..(((((((((((((....)))))))))....))))..)......)))))).))))..))..))))...)))->>>>>>>>->>>>>>->>>>).))))..))))))	NO	+	21	170	-64.2	-37.7647	0.009901
ptc-miR172g	GGAGCATCATCAAGATTCACA	256	81.01	scaffold_10	18370109	18370129	AGTCACTGTTTGCCTATGGAGCATCATCAAGATTCACAAGCTTTATTAGGGCTAGTGTGTGGTGATGATGGTGGCTTTTGGTGGTCCCTTTTTTTCAATCCAATAGCCCTTTGAATTGGGAATCTTGATGATGCTGCAGCGGCAATAAATGGCT(((((....(((((..(<-<<<<<<<<<<<<<<<<-<<(..((((..(((((((.....((((((.((.((.((((......))))))...)).)))..))).))))))).)))))))=}}}}}}}}}}}}}}}}=}}=.)))))....)))))	GGAATCTTGATGATGCTGCAG(4) GAATCTTGATGATGCTGCAGC(1)	-	21	154	-64.4	-41.8182	0.009901
ptc-miR390a	AAGCTCAGGAGGGATAGCGCC	126	51.85	scaffold_1	27693961	27693981	TTGTACACACAAGTACGGGAGAATCTGTTAAGCTCAGGAGGGATAGCGCCATGAGCATGACAAAGTCTATGTTTGAGTTAATCTCAACAAAATCAATCCAGTCATCAGTGGCGCTATCTATCCTGAGTTCTATGGGTTCTCCTTACTATTCTGGTGCAG((((((.....((((.((((((((((((.-<<<<<<<<<-<<<<<<<<<<((..(.(((((........((((.(((.....)))))))...........)))))).))))}}}}}}}}=}}}}}}}}}==})))))))))))))))......))))))	CGCTATCTATCCTGAGTTCTA(21) CGCTATCTATCCTGAGTTCT(8)	+	21	159	-69.71	-43.8428	0.009901
ptc-miR390b	AAGCTCAGGAGGGATAGCGCC	126	51.01	scaffold_6	7867995	7868015	AGTATGGAAGAATCTGTTAAGCTCAGGAGGGATAGCGCCCTAAGGATAATCATGGGCTCTTTTTATGTGGTTTTTGATTCTCAGTGGCGCTATCCATCCTGAGTTTCATTGCTTCTTCTTGCT((((.(((((((.(.((.<<<<<<<<<<-<<<<<<<<<<((.((((...(((..(((((.......).))))..))))))).)).))}}}}}}}}=}}}}}}}}}}=}).).)))))))))))	CGCTATCCATCCTGAGTTTCA(15) CGCTATCCATCCTGAGTTTC(2)	+	21	123	-53.5	-43.4959	0.009901
ptc-miR390c	AAGCTCAGGAGGGATAGCGCC	126	51.85	scaffold_9	7516342	7516362	GATATGTGCATAAGTATGGGAGGATCTGTTAAGCTCAGGAGGGATAGCGCCATGAGCTGATGATAAGTTGATGTTTGATGGGTTAATCTCAACATAATCAATCTAGTCATTAGTGGCGCTATCTATCCTGAGTTCTATAGGTTCTCCTTGCTATTCCGGTACAGTTTC((..(((((...((((.((((((((((((.-<<<<<<<<<-<<<<<<<<<<....(((((((((.(((((((...((.((((.....)))).))..))))).)).)))))))))))}}}}}}}}=}}}}}}}}}==})))))))))))))))......)))))...))	CGCTATCTATCCTGAGTTCTA(21) CGCTATCTATCCTGAGTTCT(8)	+	21	168	-79	-47.0238	0.009901
ptc-miR394a	TTGGCATTCTGTCCACCTCC	44	78.57	scaffold_2	831824	831843	TCATGTGGGTTTTGCAAAGGGTTTCTTACAGAGTTTTTTGGCATTCTGTCCACCTCCATCTGTAGAAACTACAAGTTGTTCTACTTTCTGGAGGTGGGCATACTGCCAACTGAGCTCTGTTGGTCTCTCTTTGTAAAACCCTCGTGA(((((.(((((((((((((((...((.(((((((((.<<<<<<-<-<<<<<<<<<<<(...((((((.(........)))))))....)))))))))))).).))))))..))))))))).))...))))))))))))))).)))))	NO	-	20	147	-80.3	-54.6258	0.009901
ptc-miR394b	TTGGCATTCTGTCCACCTCC	44	58.67	scaffold_5	24701313	24701332	TCATGTGGATTTAGCAAAGGGTTTCTTACAGAGTTTATTGGCATTCTGTCCACCTCCTATCTTTAGAAATTAGAATATCTCTTTCATATGGAGGTGGGCATACTGCCAACCGAGCTCTGTTGGTCTCTCTTTGTAAAACCCTCGTGA(((((.((.(((.((((((((...((.(((((((((.<<<<<<-<-<<<<<<<<<<<.......(((.((......)).))).......))))))))))).).))))))..))))))))).))...)))))))).))).)).)))))	NO	+	20	147	-63.74	-43.3605	0.009901
ptc-miR395b	CTGAAGTGTTTGGGGGAACTC	42	65.62	scaffold_6	7424478	7424498	TGCAATGGTGCATAGATCAAGTGTCCCCTAGAGTTCCCTTGAGCACTTCACTGGGACCCTTCAGACCGAAAGAGTATTATCTTTCCCACTGAAGTGTTTGGGGGAACTCCTGGTGTCATTTGATGTTAATAATTAGTTAATTGCA((((((...((..(.((((((((.(.((..(({{{{{{{=={{{{{{{{{={{(((........(((....).))........)))))->>>>>>>>>-->>>>>>>>>..)).).)))))))).).........))..))))))	GTTCCCTTGAGCACTTCACTG(31)	+	21	145	-62.29	-42.9586	0.009901
ptc-miR395c	CTGAAGTGTTTGGGGGAACTC	42	65.62	scaffold_6	8406772	8406792	TAGCATAGATCAAGTGTCCCCTAGAGTTCCTCTGAGCACTTCATTGGGAATCTTCGATTAAATGAAAGAGTATTATCATTCCTACTGAAGTGTTTGGGGGAACTCCTGGTGTCATTTGATGTTA(((((....(((((((.(.((..(({{{{{{{=={{{{{{{{{={{((((..((((......)))).((......)).))))))->>>>>>>>>-->>>>>>>>>..)).).))))))))))))	GTTCCTCTGAGCACTTCATTG(9)	+	21	124	-52.5	-42.3387	0.009901
ptc-miR395d	CTGAAGTGTTTGGGGGAACTC	42	65.62	scaffold_6	8410893	8410913	AGCATGCCATAGATCAAGTGTCCCCTAGAGTTCCTCTGAGCACTTCACTGGGAATTTCCGATCAAATGAAAGAGTATTATCATTCCTACTGAAGTGTTTGGGGGAACTCCTGGTGTCATTTGATGTTTACAAGCT(((.((....(.((((((((.(.((..(({{{{{{{=={{{{{{{{{={{(((((......((........))........)))))))->>>>>>>>>-->>>>>>>>>..)).).)))))))).)...)).)))	GTTCCTCTGAGCACTTCACTG(5)	+	21	135	-56.04	-41.5111	0.009901
ptc-miR395e	CTGAAGTGTTTGGGGGAACTC	42	95.45	scaffold_16	13792287	13792307	GAAACGCAAAGAACGTTAGCTGTCCCCCGGAGTTTCCCTGACCACTTCACTGGGGCTATAATTCTACTCTTCGTGTTTAAGGGTAGAGGCAACCCTTCCTCACTGAAGTGTTTGGGGGAACTCTGGGTGGCATTTAACACTGTTTAGCTGTC((...(((((.(..(((((.((((.(({{{{{{{{{{{=={={{{{{{(.(((((......((((((((((.......)))))))))).........)))))->>>>>>>->-->>>>>>>>>)))).)))).)))))..).))).))..))	CGGAGTTTCCCTGACCACTTC(1) GTTTCCCTGACCACTTCACTG(3)	-	21	152	-65.96	-43.3947	0.009901
ptc-miR395g	CTGAAGTGTTTGGGGGAACTC	42	65.62	scaffold_16	13793518	13793538	ATCAAGTGTCCCCTAGAGTTCCTCTGAGCACTTCATTGGGGATCTTCCATCGACCTGAAAGAGTATTATCATTCCTACTGAAGTGTTTGGGGGAACTCCTGGTGTCATTTGAT((((((((.(.((..(({{{{{{{=={{{{{{{{{={{((((((((.((......)).)))).........))))))->>>>>>>>>-->>>>>>>>>..)).).))))))))	GTTCCTCTGAGCACTTCATTG(9)	+	21	113	-51.6	-45.6637	0.009901
ptc-miR395h	CTGAAGTGTTTGGGGGAACTC	42	65.62	scaffold_761	8244	8264	ATCAAGTGTCCCCTAGAGTTCCTCTGAGCACTTCATTGGGGATCTTCCATCGACCTGAAAGAGTATTATCATTCCTACTGAAGTGTTTGGGGGAACTCCTGGTGTCATTTGAT((((((((.(.((..(({{{{{{{=={{{{{{{{{={{((((((((.((......)).)))).........))))))->>>>>>>>>-->>>>>>>>>..)).).))))))))	GTTCCTCTGAGCACTTCATTG(9)	+	21	113	-51.6	-45.6637	0.009901
ptc-miR395i	CTGAAGTGTTTGGGGGAACTC	42	65.62	scaffold_16	13797943	13797963	TTATTTTTTGTTTTCGTTAATTGTTGATAGCACAGATCAAGTGTCCCCTAGAGTTCCTCTGAGCACTTCAATGGGGATCTTCCATCGACCTGAAAGAGTATTATCATTCCTACTGAAGTGTTTGGGGGAACTCCTGGTGTCATTTGATGTTACAAGCTCAGAAAACACAGTAA(((((...(((((((.......(((..(((((....(((((((.(.((..(({{{{{{{=={{{{{{{{{={{((((((((.((......)).)))).........))))))->>>>>>>>>-->>>>>>>>>..)).).))))))))))))..)))...))))))).)))))	GTTCCTCTGAGCACTTCAATG(1)	+	21	173	-61.4	-35.4913	0.009901
ptc-miR396a	TTCCACAGCTTTCTTGAACTG	2570	92.61	scaffold_6	4636177	4636197	TCTTGGTATTCTTCCACAGCTTTCTTGAACTGCACCTATTTGAATATTGTTGTTGATGTTGCCGTGCATGTACATATGACATTGTATTTTTGTTGCGGTTCAATAAAGCTGTGGGAAGATACAAACAGGA(((((((((..<<<<<<<<<<<<-<<<<<<<<((...((..((((((...((((((((((((...)))...)))).)))))..))))))..))))))}}}}}}=}}}}}}}}}}}}==))))...)))))	GTTCAATAAAGCTGTGGGAAG(1)	+	21	130	-49.6	-38.1538	0.009901
ptc-miR396b	TTCCACAGCTTTCTTGAACTG	2570	92.48	scaffold_18	13217005	13217025	GGTGTGGTTGTACGTGACCCTCTTTGTATTCTTCCACAGCTTTCTTGAACTGCACCTATTAGATTAATGTTGATGTTGTTGTGCGATATGCCATGACCATATGACATTGTATTCATTTTTGCTGCGGTTCAATAAAGCTGTGGGAAGATACAAACAGGATCAAAGAAAGTTGCTATGTC((..((((...((.(((.(((.(((((((..<<<<<<<<<<<<-<<<<<<<<((.(.....((.(((((((.((((.((..((.(.....)))..)).)))))))))))...))......).))))}}}}}}=}}}}}}}}}}}}==))))))).))).)))......)).))))..))	GTTCAATAAAGCTGTGGGAAG(1)	+	21	179	-65.4	-36.5363	0.009901
ptc-miR396c	TTCCACAGCTTTCTTGAACTT	2406	93	scaffold_3	15576354	15576374	CTGCCATGTTTTTCCACAGCTTTCTTGAACTTCCTAGAGCCTAGAGGTGCTGCTAGCTATACATATAACTTAAGAAGTTCAAGAAAGCCGTGGAATAGCATGACCAG(((.((((((.<<<<<<-<<<<<<<<<<<<<<(((((.(((....)))....)))).................))))))))))))))).)))))).))))))..)))	NO	+	21	107	-45.22	-42.2617	0.009901
ptc-miR396e	TTCCACAGCTTTCTTGAACTT	2406	93.08	scaffold_18	13224028	13224048	GTCCTGGTCATGCTTTTCCACAGCTTTCTTGAACTTCTTTGCCTTGCTTAATCTGTGTATATATAGATCACTACATGTACAGCTCCTATATATATAAATATATGTATGTATAGCGCCATGGAAGCTCAAGAAAGCTGTGGGAGAACATGGCAATTCAGGAT((((((((((((.((<<<<<<<<<<<<<<<<<-<<<((..((.............(((((((.(((....))).)))))))....(((((((((((......))))))))))).))...))))}=}}}}}}}}}}}}}}}}}}}.))))))....))))))	GCTCAAGAAAGCTGTGGGAGA(71) CTCAAGAAAGCTGTGGGAGAA(3) CTCAAGAAAGCTGTGGGAGA(13)	-	21	161	-68.2	-42.3602	0.009901
ptc-miR396f	TTCCACGGCTTTCTTGAACTG	20	55.56	scaffold_6	25199497	25199517	GCACGGCTTGTAGATATATATGGGTCTCTTGGTGATTTTCCACGGCTTTCTTGAACTGTATATATTATCAATGGCTTTTTACAAGACTGGAAGATGGTTTCCATGGAGAAGAATTGTCACAAAAACAGTTCAAGAAAGCCCTGAAAAATTATTTAGAGGATCTAGTTTATATATGTCTATACAATGGCTGGC((.((((((((((((((((((((((((((..((((((<<-<<-<<<<<<<<<<<<<<<(.........((((..((((((.((....((((((....)))))))))))))).))))........)))))))))))))))).)).))))))))..))).))))).....)))))))))))))....)))))))	NO	-	21	192	-70.23	-36.5781	0.009901
ptc-miR398a	TGTGTTCTCAGGTCACCCCTT	17	94.44	scaffold_10	15683263	15683283	GAGTCTCAGTTTCATACGACAGCCGGTACACCCCAGAGGAGTGGCTCCAGAGAACACAGGGGGTTGGTTTTCTAGCTGTAAGCTACAAGATGGACAAAGCACTCTGTGTTCTCAGGTCACCCCTTTGGGGCACCCTGTGGAGATGACTT(((((...(((((.....((((..(((...((((((({{={{{{{{==={{{{{{{{{(((.(((.(((((.((((.....)))).))))).)))......)))>>>>>>>>>->>>>>>->>>>))))).))))))).))))))))))	GGAGTGGCTCCAGAGAACACA(1)	+	21	149	-66.5	-44.6309	0.009901
ptc-miR399f	TGCCAAAGGAGAATTGCCCTG	128	96.97	scaffold_4	4599727	4599747	GATGGAGCTAGGCAATACATTTATCATTTATGGCTAAAGAATAACAGGGCTTTATCCTCCTTTGGCAAACAGAACATGGAAATAAATGCCTGCATATTTCTGTTTTGCCAAAGGAGAATTGCCCTGCCATTCGATTCCACAGTTACTTGAATGTGTCTATTGCTCTTC((.((((((((((...(((((((....((.(((.....((((..((((((...((.((((((((((((((((((.((....))..(((....)))..))))).))>>>>>>>>>>>->>->>>>>>..))))....))).)).....))))))))))))..)))))))	NO	+	21	168	-57.9	-34.4643	0.009901
ptc-miR399g	TGCCAAAGGAGAATTGCCCTG	128	96.24	scaffold_4	4640170	4640190	GAGTAGTGATGAATAACTGTGCAATTCTCCTTTGGCAGACGTATATGGCGTTCGGACACCAACTTTGGACTGCCAAAGGAGAATTGCCCTGCCATTCAACTACACTGCC(.((((((.(((((..(.{={{{{{{{{{{{{{{{{{{=((....(((.((....)).)))....))..)>>>>>>>>>>>>>>>>>->->..)))))....)))))))	GTGCAATTCTCCTTTGGCAGA(4)	-	21	109	-46.4	-42.5688	0.009901
ptc-miR403a	TTAGATTCACGCACAAACTCG	160	87.43	scaffold_1419	5251	5271	GGAAGAGGCATATTTCAGGTTTGTGCATGAATCTAATATAGCTAAAAAAATCCCATCAAACACAAATTAAAATACTAGATAGCAATCAGCACTAGTTTAGTATAGTATTAGATTCACGCACAAACTCGTAATCTGTCTTTTTC((((((((((.(((.(.={{{{{{{{={{{{{{{{{{{(.(((((............................(((((...((.....)).))))))))))...)))>>>>>>>>>->>>>>>>>-->.))).))))))))))	GGTTTGTGCATGAATCTAATA(29)	-	21	143	-43.78	-30.6154	0.009901
ptc-miR403a	TTAGATTCACGCACAAACTCG	160	87.43	scaffold_2	15394890	15394910	GGAAGAGGCATATTTCAGGTTTGTGCATGAATCTAATATAGCTAAAAAAATCCCATCAAACACAAATTAAAATACTAGATAGCAATCAGCACTAGTTTAGTATAGTATTAGATTCACGCACAAACTCGTAATCTGTCTTTTTC((((((((((.(((.(.={{{{{{{{={{{{{{{{{{{(.(((((............................(((((...((.....)).))))))))))...)))>>>>>>>>>->>>>>>>>-->.))).))))))))))	GGTTTGTGCATGAATCTAATA(29)	+	21	143	-43.78	-30.6154	0.009901
ptc-miR403b	TTAGATTCACGCACAAACTCG	160	95.24	scaffold_10	14828063	14828083	AGAGGACTCATATCTCTAGTTTGTTCGTGGATCTGACGCCATCACAACCGTTCATTTCACGACCATCCAATGGCGTTAGATTCACGCACAAACTCGCGATCTGTCTCCTCT((((((..((.(((.(.{{{{{{{={{{{{{{{{{{{{((((......(((.......)))........))))))>>>>>>>>>>>->>>>>>>->.))).))..))))))	AGTTTGTTCGTGGATCTGACG(1)	-	21	111	-49.24	-44.3604	0.009901
ptc-miR403c	TTAGATTCACGCACAAACTCG	160	94.12	scaffold_8	6485491	6485511	TCTTCTCCCCTAACAAGAGGAGTCCTATCTCTGGTTTGTGCGTGGATCTGAGGCCATCACAACCGTCCACTACACGACCACCCAATGGCTTTAGATTCACGCACAAACTCGCGATCTGTCTCCTCTACTACACCGAATAGA(((..((........(((((((.(..(((.(.(((((((((((((((((((((((((.......(((........)))......))))))>>>>>>>>>>>>>>>>>>>->.)))..).)))))))........))..)))	NO	+	21	141	-58.41	-41.4255	0.009901
ptc-miR472a	TTTTCCCTACTCCACCCATCCC	1805	54.38	scaffold_5	119685	119706	AGTTAACACATATGGGAGGAATGGAGAGGGAGTAGGATTTTCGGAAGGTTATCGGGTGGGTGAGCGGGGAAGATAACTTTGGTTTTTGAGATAGTACTTGTTATTTTCCCTACTCCACCCATCCCATAGGTTTCCGATCATTCCTCCCTCTCCTCATCACTCTGCTTCTCATGGCCTGTTTATCT((..((((..(((((((((...((((((((((..((((..(((((((.((({={{{{{{{{{{{=={{{{{{{((((...(((.((......)).))).))))>>>>>>>-->>->>>>>>>>>-)))).)))))))..))))))))))))))...........)))))))))...))))...))	TCGGGTGGGTGAGCGGGGAAGA(13) CGGGTGGGTGAGCGGGGAAGAT(2)	+	22	185	-83.94	-45.373	0.009901
ptc-miR472b	TTTTCCCAACTCCACCCATCCC	2997	72.92	scaffold_13	103757	103778	GCAGACAGCCGCCTTGAAGTTGATGTTGGATGGGAGGAAATGGAGAGGGAGTAGGGTTTTCGGAAGGTTACTGGATGGGTGAGTGGGGAAGATAACTAAGCTCTGTTTGTTATTTTCCCAACTCCACCCATCCCATAGGTTTCCGATCATTCCTCCCTCTCCTCATCACCTCACCTCTGCTCCTCTCTCTTTACAAGTATGCTTGGTTTGC(((((((((...(((((((..((.(..(((.((((((....((((((((((..((((..(((((((.(((..((((((((((((.(((((((((((.((((...))))))))>>>>>>>->>>->>>>>>>>>-.))).)))))))..))))))))))))))......)))).)))))...).))...…	NO	+	22	211	-93.6	-44.3602	0.009901
ptc-miR475b	TTACAGTGCCCATTGATTAAG	57	48.31	scaffold_8	14223479	14223499	CTTCTGGCTTTCATAGTCATAACATCTTGATCAATGGCCATTGTAAGAGTAGAAGGATCCATGAAGCAATAACTCTCTTTGCTGAAATGTGCGACCAAATAGACTCTTGATATTTCATTCTTACAGTGCCCATTGATTAAGATGTTATAACATTGTTCTCAAAGG(((.(((....((..((.(((((((((((((((((((.((((((((((((.((((.((((((..(((((.........)))))...)))...................))).))))))))>>>>>>>>->>>>>>>>>>>>))))))).))..))...))).)))	NO	-	21	165	-52.4	-31.7576	0.009901
ptc-miR475c	TTACAATGTCCATTGATTAAG	13	54.17	scaffold_10	12908755	12908775	GCATTTGATCTTCATAGTCATAACATCTTGAACAATGGCCATTGTAAGAGTAAGTGGTCCATGAGTCAATAACTCTCTTTGCAGAAATGCATGACAAAGCATTGACTCCTATTTCACCCTTACAATGTCCATTGATTAAGAGGTTATAACATTGTTATCAAGGGGT((.((((((...((..((.(((((.((((((.((((((.(((((((((.((((((((.....((((((((.........((((....)))).........)))))))))))))).)).)>>>>>>>>->>>>>>->>>>>).))))).))..))..))))))..))	NO	+	21	166	-52.97	-31.9096	0.009901
ptc-miR530a	TGCATTTGCACCTGCACCTTA	202	91.82	scaffold_9	1538682	1538702	GACCAGCATGCCAACATGTTGCCTTTATCTGCATTTGCACCTGCACCTTACTTGTTTCTTTCTTTTGTTTTTGACTCCAAAACCAAAAGTAAGTTTGAAACATTAAAACAAGCTTGAGGTGCAGGTGCAGGTGCAGGTGAATGCCATGTTGGTGTTTTGACACTTGTC((((((.(((((((((((..((.((((((<<<<<<<<<<<<<<<<<<<<<((((((((((.((((((.(((((....))))).)))))).)))............)))))))..))}}}}}}}}}}}}}}}}}}}}})))).))))))))))))).)))......)))	AGGTGCAGGTGCAGGTGCAGG(6)	-	21	168	-78.9	-46.9643	0.009901
ptc-miR827	TTAGATGACCATCAACGAAAA	32	96.97	scaffold_7	120963	120983	TTGCAACCATGAATATATTTGTTGATAGTCATCTAGTGAACATTGAAAGTCATATTAGATGACCATCAACGAAAACATTCATGATATTGCAA((((((.(((((((.(.{{{{{{{{{={{{{{{{{{{{.((.......))..))>>>>>>>>>->>>>>>>>>->.)))))))...))))))	TTTGTTGATAGTCATCTAGTG(2)	+	21	92	-33.9	-36.8478	0.009901
ptc-miRX107	ACGCTCAAATATATAAGGTGTT	5	100	scaffold_3	6331080	6331101	GGGGAAATTAGCTTAAACACCCTATTGTTTGAGCGTGAGGATACTTTTCGCCCTGATTTTTCATAAAATTGCTCTTTGACCACGCTCAAAAGATCTTGCAAGGAATGTAAGTATTTTCACGCTCAAATATATAAGGTGTTTAACGTAATTTATCT((..((((((..(((((((((.((((((((((((((((((((((((....((.(((....))).....(((((((((((......)).)))))....)))))).....))))))))))>>>>>>>>>>>->>>->>>>>>)))..))))))..))	NO	+	22	155	-51.4	-33.1613	0.009901
ptc-miRX109	GAGTTTGATCGATTTCGAGTT	8	47.06	scaffold_3	7164997	7165017	GGGTTAAAACTCGAAATCAGTCACACTCGGTCAAACTCGTAAAATCAGTCCGATTTTACCGATTTTAACCGAGTTTGATCGATTTCGAGTTTTAACCT((((((((((((((((((.((((.(((((((.(((.((((((((((.....))))))).))).))).)))>>>>->>>>->>>>>>>>>>>)))))))	NO	-	21	98	-51.5	-52.551	0.009901
ptc-miRX110	AGCTCAAGCACAAATTCGATC	130	95.59	scaffold_3	9383305	9383325	TGCAGAGTAGAAGTCGAGCTCAAGCACAAATTCGATCTTGCTTAACAAGGTACCGGCAAAGTCAGATCGAATTTGGGCTTGAGATTGTCTTCTTCGTTGCA(((((...(((((.((<-<<<<<<<-<<<<<<<<<<<(.((((.....(....)....)))).)))}}}}}}}}}=}}}}}}}=}}}.)))))...)))))	TCGAATTTGGGCTTGAGATTG(42) TCGAATTTGGGCTTGAGATT(22) CGAATTTGGGCTTGAGATTG(1)	+	21	101	-45.9	-45.4455	0.009901
ptc-miRX117	TCTCTTATGCATTTTTGTCCC	17	48.57	scaffold_4	2221800	2221820	ATGGATGGGATCAGCAAGGGGCAAAGATGCATAAGAGAGATGTACAAGGGTAGGGAAGGGGAAGAGAAAGATCGATATCGACTACCCTTCTTTTTCTCTTATGCATTTTTGTCCCTCGCTAGTCTCACCCAT((((.((((((.(((.((({{{{{{{{{{{{{{{{{{{{{.....((((((((....((....((......))....))..))))))))...))>>>>>>>>>>>>>>>>>>>>>).))).)))))).))))	GGCAAAGATGCATAAGAGAGA(2)	+	21	132	-67.7	-51.2879	0.009901
ptc-miRX12	TCCATGGAAGATAATGACTCG	6	100	scaffold_1	20468231	20468251	GGACCCATGCATGGCGAACAAGTTGAGCTGTAGGGTTATGATGAACATGCTAATTACAAGCTATTGTCTTCCATGGAATAGGCAGTGATGGCATTTGTTTTATTTTCCTGAGGTGGAGAAAAACAAATAGACCATAACACTGTTATTCCATGGAAGATAATGACTCGTGGTTGACACTTGATCTCTCCAGTCCAGTTCAGATTCAAGCTAGCTGCTGTCT((((....((.((((.......((((((((...((....(((.((..((.(((((((.{{={{{{{{{{{{{{{{{{{{((.(((((((((((((((((((..(((((......)))))))))))))).).))))..)))))))))>>>>>>>>>>>>>>>>->>->)))))).)).))…	AGCTATTGTCTTCCATGGAAT(1)	-	21	220	-82.82	-37.6455	0.009901
ptc-miRX124	TATCAATCATCAAATGTTCGT	5	71.43	scaffold_4	11447661	11447681	GTGCATATATATACATGAATGTGCCTCATGTCTGGTATGAGCATTTGATGATTGATAATTTCAATTTGTTTACATCTTTTTTCTGCAATCCTAATACCGCGTACTTTCAAATGTAAAGAAATTGAAATTATCAATCATCAAATGTTCGTACCATACGTAAGGCACACTCGTATGTATAATTGTAT(((((..((((((.((((.(((((((.((((.((((((({{{{{{{{{{{{{{{{{{{{{(((((((.(((((((........(((............))).........))))))).))))))))))>>>>>>>>>>>>>>>>>>>>>)))).)))).))))))).)))).))))))..)))))	AGCATTTGATGATTGATAATT(1)	+	21	185	-85.33	-46.1243	0.009901
ptc-miRX128	TTGTACACAGAATAGGTGAAAT	56	65.88	scaffold_5	1237722	1237743	CTTGGTTACTGATATTATTTTGAACCGTCATGTCAATTATTGGTTATATATCGACTGAAAATGAAAGCTATTTCACTATTCTGTGCACACAATGCTTGAAACATTAATCATGGTTTTTGAAAGTATTGGAGCATTGTACACAGAATAGGTGAAATAACTTTCATTTTCATTCGATACGCAACTAAAATTGTAAATATAGTTCAGTCTCATCTTGGAAGCCAAG(((((((.(..(.......((((((..(.....(((((.((((((.(.((((((.((((((((((((.((({{{{{{{{{{{{{{==={{{{{((((.((((.....(((.......)))..)).)).)))))>>>>->>>>>>>>>->>>>>>>).)))))))))))).))))))…	TTCACTATTCTGTGCACACAAT(1)	+	22	223	-76.94	-34.5022	0.009901
ptc-miRX13	TCCATGGAAGATAATGACTCG	6	100	scaffold_1	20471501	20471521	GGACTCATGCATGGCGAACAAGTTGAGCTGTAGGGTTATGATGAACATGCTAATTACAAGCTATTGTCTTCCATGGAATAGGCAGTGATGGCATTTGTTTTATTTTCCTGAGGTGGAGAAAAACAAGGAGACCATAACACTGTTATTCCATGGAAGATAATGACTCGTGGTTGACACTTGATCTCTCCAGTCCAGTTCAGATTCAAGCTAGCTGCTGTCT((((....((.((((.......((((((((...((....(((.((..((.(((((((.{{={{{{{{{{{{{{{{{{{{((.((((((((((.((((((((..(((((......)))))))))))))..).))))..)))))))))>>>>>>>>>>>>>>>>->>->)))))).)).))…	AGCTATTGTCTTCCATGGAAT(1)	-	21	220	-82.02	-37.2818	0.009901
ptc-miRX130	GAGTTTGATCGATTTCGAGTT	8	44.44	scaffold_5	9126954	9126974	CCGAGTTTGATCGATTTCGAGTTTTTAACCCGATTTCACACGTACTCGTAAAATCGTACGATTTTACGAGTTAACTCGTAATTTGACAACATTGG((<<--<<<-<<<<-<<<<<<<<....................((((((((((((....)))))))))))).)))))).)).)))))))..))))	NO	+	21	95	-27.5	-28.9474	0.009901
ptc-miRX133	GGAGTGATTCAGGGAACCCAT	5	55.56	scaffold_5	21920831	21920851	GTAATGCTAAAAGCCCCAAAAGTTGGAACCCAAATGTTTTCCCTGAATCACTCCCACCATTGATTGGTGGGCTCCATGCACCAATTAAACAGTGGGAGTGATTCAGGGAACCCATTCAGGCTCATCGGACTCTTAGGTTTGATTAGTATGC(((.(((((((((((..((.((((.((.((..((({=={{{{{{{{{{{{{{{{{{(..((((((((((.(.....).))))))))))...)))>>>>>>>>>>>>>>>>-->>>)..))....)).)))).)).)))))..)))))))))	GTTTTCCCTGAATCACTCCCA(4)	-	21	151	-67.9	-44.9669	0.009901
ptc-miRX137	TCTCTTATGCATTTTTGTCCC	17	50	scaffold_5	24270220	24270240	ATGGATGGGATCAGCGAGGGGCAAAAATGGCATAAGAGAGATGTACAGCGGTTGGGAAGGGGAAGAGAAAGATCGATATCTACTACCCTTCCTTTTCTCTTATGCATTTTTGTCCCTCGCCAGTCTCGCCCAT((((.((((((..((((((((((((((((.(((((((((((............((((((((....(((.(......).)))....))))))))))>>>>>>>>>>>>>>>>>>>>>))))..)))))).))))	NO	+	21	133	-66.9	-50.3008	0.009901
ptc-miRX139	TCTCTTATGCATTTTTGTCCC	17	50	scaffold_5	24280205	24280225	ATGGATGCGACCGGCAAGGGACAAAAATGGCATAAGAGAGATGTACAGGGGTAGGGAAGGGGAAGAGAAAGATCGATATCTACGCCCCTTCTTTTTCTCTTATGCATTTTTGTCCCTCGCCAGTCTCGCCCAT((((.((.(((.(((.(({{{{{{{{{{{={{{{{{{{{((..(((....))).((((((((...(((.(......).)))...)))))))).))>>>>>>>>>>>>>>>>>>>>>).))).))).)).))))	GGACAAAAATGGCATAAGAGA(1)	+	21	133	-64.6	-48.5714	0.009901
ptc-miRX14	TCCATGGAAGATAATGACTCG	6	100	scaffold_1	20476200	20476220	GGACTCATGCATGGCGAACAAGTTGAGCTGTAGGGTTATGATGAACATGCTAATTACAAGCTATTGTCTTCCATGGAATAGGCAGTGATGGCATTTGTTTTATTTTCCTGAGGTGGAGAAAAACAAGGAGACCATAACACTGTTATTCCATGGAAGATAATGACTCGTGGTTGACACTTGATCTCTCCAGTCCAGTTCAGATTCAAGCTAGCTGCTGTCT((((....((.((((.......((((((((...((....(((.((..((.(((((((.{{={{{{{{{{{{{{{{{{{{((.((((((((((.((((((((..(((((......)))))))))))))..).))))..)))))))))>>>>>>>>>>>>>>>>->>->)))))).)).))…	AGCTATTGTCTTCCATGGAAT(1)	-	21	220	-82.02	-37.2818	0.009901
ptc-miRX147	TCCACAATCCCATCAAGACTT	9	69.23	scaffold_7	4998553	4998573	CCATTTGAAAATTAGTCGTATATGTTCCTAAATTTTGACGGGATTGTGGATCCGACCAGGTATGACACATTGTGGTGAGAAGTACCTCTATCTTCATTTTTCATGTAGATCATCAAGTGAAGGTATAGTTACTATATCGTACCATTGTGCTTCATACTTGTCAGATCCACAATCCCATCAAGACTTTGGAGCACATATGACAGGTTCTCAGAATGG((((((((.(((..(((((((.((((((.((.((((((.(((((((((((((.(((.((((((((..(((.((((((.((((((.((.(((((((((((...(((.....))).))))))))))).)).))))...)).)))))).)))..))))))))))).))>>>>>>>>>>>->>>>>>…	NO	+	21	216	-95.5	-44.213	0.009901
ptc-miRX15	TCCATGGAAGATAATGACTCG	6	100	scaffold_1	20479454	20479474	GGACTCATGCATGGCGAACAAGTTGAGCTGTAGGGTTATGATGAACATGCTAATTACAAGCTATTGTCTTCCATGGAATAGGCAGTGATGGCATTTGTTTTATTTTCCTGAGGTGGAGAAAAACAAGGAGACCATAACACTGTTATTCCATGGAAGATAATGACTCGTGGTTGACACTTGATCTCTCCAGTCCAGTTCAGATTCAAGCTAGCTGCTGTCT((((....((.((((.......((((((((...((....(((.((..((.(((((((.{{={{{{{{{{{{{{{{{{{{((.((((((((((.((((((((..(((((......)))))))))))))..).))))..)))))))))>>>>>>>>>>>>>>>>->>->)))))).)).))…	AGCTATTGTCTTCCATGGAAT(1)	-	21	220	-82.02	-37.2818	0.009901
ptc-miRX158	CCGACCTTAGCTCAGTTGGTG	64	100	scaffold_9	1386357	1386377	ACCGACCTTAGCTCAGTTGGTGGAGCGGAGGGCTGTAGGTCGCTGGTTGGATTCCGGCAAGGTCGGATTTCAATTTTGTAATTTCTTTTCTCACCGACCTTAGTTCAGAAGTTGCATTGTTTTGTCTGTTGAGGTGGT(<<-<<<<<<<<-<<<-<<<<<.(((...((((((.((((((.((((((((.((((((...)))))).)))))).................)).))))))))))))....))).)))))..)))...)))))))))))	NO	-	21	138	-46.12	-33.4203	0.039604
ptc-miRX162	TCTCTTATGCATTTTTGTCCC	17	50	scaffold_5	24266027	24266047	ATGGATGGGATCAGCGAGGGGCAAAAATGGCATAAGAGAGATGTACAAGGGTGTGGAAGGGGAAGAGAAAGATCGATATCTACTACCCTACTTTTTCTCTTATGCATTTTTGTCCCTCGCCAGTCTCGCCCAT((((.((((((..((((((((((((((((.(((((((((((.((...((((((((((.......((......))....))))).)))))))..))>>>>>>>>>>>>>>>>>>>>>))))..)))))).))))	NO	+	21	133	-65.2	-49.0226	0.009901
ptc-miRX164	GAGTTTGATCGATTTCGAGTT	8	44.44	scaffold_11	1847300	1847320	GTTAAAACTCGAAATCAATCAAACTCGGTCAAACTCGTAAAATCGATCTGATTTTACCGATTTTAACTGAGTTTGACCGAGTTTGATCGATTTCGAGTTTTAAC((((((((((((((((.(((((((((((((((((((.((((((((............))))))))...))))))))))>>>>>>>>>->>>>>>>>>>>)))))	NO	+	21	104	-60.2	-57.8846	0.009901
ptc-miRX18	TCGTAATGCTTCATTCTCACAA	303	82.11	scaffold_1	22901483	22901504	CTTTTGCACGCTCTCGTAATGCTTCATTCTCACAACGGCAAAGTGTTATTGCATCATCCTAATGATTATCATCAGCCGTCGTGGGAATGAACATTATGAGACTGTGTATACAG((..((((((.((<<<<<<<<-<<<<<<<<<<<-<((((...((((....))))........((((....))))))))).}}}}}}}}}}}}}}}}}}}}}=))))))...))	GTGGGAATGAACATTATGAGAC(2) GTGGGAATGAACATTATGAGA(140)	-	22	113	-47.3	-41.8584	0.009901
ptc-miRX2	TCCCTTACAATCTACTCTTTC	40	64.52	scaffold_1	5198941	5198961	TGAAATCCAAGTGGACTTCCCTTACAATCTACTCTTTCAGTTTCACAGAAGATCCAGATTAGATTTTAAGGCAAACAAATTGATAGAGCAGATTGTAAGGGAAGCCCACATGGATTTCA(((((((((.((((.((<<<<<<<<<<<<<-<<<<-<<(((((..(..((((((.......))))))..)......)))))))=}}}}=}}}}}}}}}}}}}}}.)))).)))))))))	TAGAGCAGATTGTAAGGGAAG(1)	-	21	119	-56.8	-47.7311	0.009901
ptc-miRX29	GGACATGGGTTGGTTTGCAAGA	99	86.09	scaffold_10	12814778	12814799	AGAGAAGAGGGGAAAGAGATGGAGGACGAGGAAGTTTCTGGACATGGGTTGGTTTGCAAGAAAATAAGATTTTTGAACTCTCTGATATTGTTCATGGAAAACAGTTTTCTTGCCGACCCCACCCATGCCAATGATTTCCTCAGCTTCCTCTCTCTCCCTGTTTCCTTCTCT(((((((.(((((.(((((.(((((..(((((((((..(<<-<<<<<<<-<<<<-<<<<<<((((....((..(((((...........)))))..)).....))))))}}}}=}}}}==}}}}}}}}}}=.)))))))))..)))))))))).))))).....)))))))	TTGCCGACCCCACCCATGCCAA(4)	-	22	171	-81.2	-47.4854	0.009901
ptc-miRX35	TTGTACACAGAATAGGTGAAAT	56	88.89	scaffold_107	19916	19937	GAGAGTTGTTTGATCTGTCCTGAAACACCAATCACGAATCTTGCAAGAATTGAGGTATTGTACACAGAATAGGTGAAATAGCTTTC(((((((((((.((((((.(((..(((...(((.(((.(((....))).))).))).->>>--->>>->>>>>>->>>>)))))))	NO	-	22	86	-24.9	-28.9535	0.019802
ptc-miRX36	CCAAATGAAGAAGCAGAAGCC	27	52.94	scaffold_11	1164682	1164702	TCATGTAAAGTGAATGCTGAGTAAGAAGCCAAATGAAGAAGCAGAAGCCATCACTAGCGCCGCCCTAATTAAATGCTCAACCCGTCATTTTGATCGCAACGAGTTTTCATCTGCATATGGGAAGATTTTCATGGAGAAGAATGCTGTAGCATTCAGTTAAGTCTGATTGCAAACCTCGTGATGTATTGAGCATTTACTTAATATGCTGATGGTGACTTCTGCTTCTTGATTTGGTGCCTGAATCAACATTAACTTTTCATGA(((((.(((((.((((.(((...((..(<<<<<<-<<<<<<<<<<<<-<((((.(((((......(((.(((((((((((..((((((..........((.(((.(((.(((.((..((..(....)..)))).)))…	CTTCTGCTTCTTGATTTGGTG(1)	+	21	262	-98.3	-37.5191	0.009901
ptc-miRX37	GAGTTTGATCGATTTCGAGTT	8	44.44	scaffold_11	1785339	1785359	CGAGTTAAAACTCGAAATCAATCAAACTCGGTCAAACTCGTAAAATCGATCTAATTTTACCGATTTTAACTGAGTTTGACCGAGTTTGATCGATTTCGAGTTTTAACCTG((.((((((((((((((((.(((((((((((((((((((.((((((((............))))))))...))))))))))>>>>>>>>>->>>>>>>>>>>))))).))	NO	+	21	110	-61.2	-55.6364	0.009901
ptc-miRX49	GGATGCCTTTGGGGGAGATTG	306	79.07	scaffold_12	11669997	11670017	GTTTCATGTATAGTACAACAATGGTTGGAGAAGCTCCCAATCTCCCTCAGAGGCTTCCAATATCTCAGTTTATAGTAATTGCTTCAAATAACGAGAATGTTGGATGCCTTTGGGGGAGATTGAGAGCTTACTCCCCACGACTAAATGGGAT((..(((...((((.......(((..((((((((((.(({{{{{{{{{{{{{{{={{{{{((((((.((((..(((....)))..))))...))).)))))>>>->>>>>>>>>>>>>>>>>.)))))).)))))))..)))).)))..))	ATCTCCCTCAGAGGCTTCCAA(61)	-	21	151	-70.2	-46.4901	0.009901
ptc-miRX63	TGAGGCCTTTGGGGGAGAGTGG	215	96.85	scaffold_14	6873257	6873278	CTCTATGCATGGTCTCAGGGTGGCAATCATTGTTCACTCTCCCTCAAGGCTTCCAACGCAATAACCAGCTACGTACATGTAACTGTGTTACGGCTGCAGGCTTGAGGCCTTTGGGGGAGAGTGGTCAAAAGTTGTCATGATTTTGGCAGACGAG(((..(((..((((.....((((((((..(((..(((((((((((((((((((.((.((......((((..(((((((......))).))))))))...)))>>>>>>>->>>>>>>>>>>>>-.)))..))))))))))))...)))...)))	NO	+	22	154	-62.4	-40.5195	0.009901
ptc-miRX7	CCGCTGTCGCCACTATCTTCCT	16	88.89	scaffold_1	9702186	9702207	TCCTTAAAGCCCTCGCCTTCTCCGGCACCGCCGCTGTCGCCACTATCTTCCTCCGCTTCACTCCGGTCATCGACAGCGGCGGTGGAGACTGGTTCGGGGGAGGCAGTTGGTTAGGCGGCGGCGGCGGTGGCGGCGGCGGCGGAGACGGAGGA(((((...(.(..((((.((.(((.(((((<<<<<<<<<<<<<<<-<<-<<<((.((.....((((((.((.((.......)).))))))))...)).))))).)).))))..)))))))))))))))).))).)).))))..).).)))))	NO	+	22	152	-89.3	-58.75	0.009901
ptc-miRX74	TTCATTCCTCTTCCTAAAATGG	91	83.49	scaffold_15	8556726	8556747	GGCTGCTTCTTTTTCTCTCTGGGCACGTTGTTCATTCCTCTTCCTAAAATGGCTTCTTCTCCTTTAGTTGTTGCAATTATAGGAGAGGAGAATCCATTTTAGGAAGGGAATGAATACTGTGTCGGTTTTACGAGGGAGACAATC(..(((((((((......((((.((((.((<<<<<<<<-<<<<<<<<<<<<<.((((((((((.((((((...)))))).))))))))))...))}}}}}}}}}}}}}}}}}}}}}=))))))))......))))))).))..)	ATTTTAGGAAGGGAATGAATAC(7) ATTTTAGGAAGGGAATGAATA(37)	+	22	144	-66.7	-46.3194	0.009901
ptc-miRX75	GGAAACCTTTTGTGGGGGTTTG	122	93.13	scaffold_15	12329515	12329536	ATGGTTGGAGAAGCTCCCAACTCCCTCAAAGGTTTCCAGCATCACATAATTGCTTCAAGTAATGGGAATGTTGGAAACCTTTTGTGGGGGTTTGAGAGCTTACTCCCCAT((((..(((((((((((.(((((((.((((((((((((((((..(...(((((.....))))).)..)))))>>>>>>>->>>>->>>>>>>->.)))))).))))))))	NO	-	22	110	-56.8	-51.6364	0.009901
ptc-miRX77	AGCAGAAGCCATCACTAGCGC	9	75	scaffold_16	71310	71330	AATGCTGAGTAAGAAGCCAAATAAAGAAGCAGAAGCCATCACTAGCGCCGCCCTAATTAAATGCTCAACCCGTCATTTTGATCGCAACGAGTTTTCATCTGCATATGGGAAGATTTTCATGGAGAAGAATGCTGTAGCATTCAGTTAAGTCTGATTGCAAACCTCGTGATGTATTGAGCATTTACTTAATATGCTGATGGTGACTTCTGCCTCTTGATTTGGTGCCTGAATCAACATT((((.(((...((..(((((((.((((-<<<<<<<-<<<<<-<<<<<-.....(((.(((((((((((..((((((..........((.(((.(((.(((.((..((..(....)..)))).))).))).))))).(((.((((......)))).)))...…	NO	-	21	238	-81.1	-34.0756	0.009901
ptc-miRX8	CGCTCGCCAGCGTTGCACCACC	9	69.23	scaffold_1	10455758	10455779	AGGAAGGTTTCAGACGCTCGCCAGCGTTGCACCACCAAAACTTGCAAAAGTTCTGATGGTGCCACGCTGTGTGCGTCTAAAATCTCTT((((.(((((.(((<<<-<<<-<<<<<-<<<<<<-<(.(((((....))))).)).)))))).)))))))).)))))).)))))))))	NO	-	22	88	-44.2	-50.2273	0.009901
ptc-miRX80	CACTCTTACAGTGCCCATTGA	139	50.55	scaffold_17	1876782	1876802	TCTTCTGGCTTTCATAGTTATAACATCTTGATCAATGGCCATTGTAAGAGTAGAAGGATCCATGAAGCAATAATTCTCTTTGCTAAAATGTGTGATAAAACATTGACTCCTGGTATTTCACTCTTACAGTGCCCATTGATTAAGATGGTATAATGTTGTTATCAAGGGA(((..(((.(..((..((((((.(((((((((((((((.((((((((((((.((((...(((.(((((((.........)))))..(((((........)))))...)).)))..)))>>>>>>>>>>>>>->>>>>>>)))))))).))))))..))..))))..)))	NO	+	21	169	-61.3	-36.2722	0.009901
ptc-miRX89	TCAAATAGCATCCTCAACATT	5	71.43	scaffold_18	12331893	12331913	ATGGCCTAATTTTGAGTGGATTTCAAATGTTGAGGATGTTTTTTGATTAAAGTTGTTAATTTGAAATTAAGGGGTTCTAATACGGAGGAATTTACTGTATGTGGATTCTGCTGCTGTGAATCTGTTGTGGAATTTGAAATTCTAAATTGAAACTAAACATAAATAAATAAAATAACTTCAATCAAATAGCATCCTCAACATTTTAAATTCACTCAAAATTAATCCAT((((..(((((((((((((((((.((((((((((((((((.(((((((.((((((((.(((((....(((.((((((.....(((.(((((((((.....))))))))).)))....)))))).)))((((((.....))))))...................)))))..))…	NO	-	21	227	-83.2	-36.652	0.009901
ptc-miRX90	GCAAGCATCCTTGGTTCTCC	84	43.3	scaffold_18	14341587	14341606	ATCTTGCATGAAGTGATAGAGAGTGGATTTGAGCCAAGGATGACTTGCCGCAGATGCATGGTCCTTGCTGCTGATCACATACCAAGGGGGGTTTTGGGTGGCAAGCATCCTTGGTTCTCCTTCGCTCTGTATTTCCTCATGCGAGAT(((((((((((.(.((((.((((((((...((((((((((((.((((((((.((.((....((((((.((.((....)))).))))))..)).))..)))>>>>>>>>>>>>>>>>>---)))))))).)))).).)))))))))))	NO	-	20	147	-73.5	-50	0.009901
ptc-miRX93	TTGAGTCCTTCCATTAGATCC	6	100	scaffold_19	4638262	4638282	AAAAATCAGTGCAGGATCTAGTGAAAGGACTCAAGCTCGTGATAGATAATTATTTTCTTTGAGTCCTTCCATTAGATCCCGCAATGATTTTT((((((((.(((.((((((((((.(((((((((((...(((((.....)))))....)>>>>>>>>>>->>>>>>>>>>.))).))))))))	NO	-	21	92	-42.3	-45.9783	0.009901
ptc-miRX99	AGCTGCCGACTCATTCATTCA	14	58.33	scaffold_19	15846621	15846641	GAGCTTCCTTCAGTCCACTCATGGACGGGCGAAGGGTTTGGATTAGCTGCCGACTCATTCATTCAAACACAGTAGACAAGGAGTGGCAGCGGCTGCTATTGTGAATGTGTGAATGACGCGGGAGATTAATTTCATCCTTTTCTTCTCTGTGCTTGGACTGAAGGGAGCTC(((((((((((((((((..((((((..((.(((((((..(((((<<<<-<<<--<<<<<<<<-<<..((((((((...((..((....))..)).))))))))..))=}}}}}}}}==}}}=}}=}}})))).))))))).))..))))))..)))))))))))))))))	TGTGAATGACGCGGGAGATTA(2)	+	21	170	-82.4	-48.4706	0.009901
ptc-miRXX160b*	GCGTATGAGGAGCCATGCATA	72	88.89	scaffold_8	2253377	2253397	ACCATGCATCCATATATATTATATGTGCCTGGCTCCCTGTATGCCATTTGCAGAGCCCAACGGATCCTCGATGGCCTCCGTGGATGGCGTATGAGGAGCCATGCATATTCGCATGTATATTATACATGGT((((((.....((((((((...((({{{={{{{{{{=={{{{{{{{((..(.(((.(((.(((....))).))).))).)..))))>>>>>>-->>>>>>>->>>>>)....))))))))....))))))	TGCCTGGCTCCCTGTATGCCA(21) GCCTGGCTCCCTGTATGCCAT(1)	-	21	130	-63.1	-48.5385	0.009901
ptc-miRXX160c*	GCGTATGAGGAGCCATGCATA	72	88.89	scaffold_10	19585283	19585303	CCATCATGCATCCATATATATTATATGTGCCTGGCTCCCTGTATGCCATTTGCAGAGCCCACCGGTTCTTCGATGGCCTCCGTGGATGGCGTATGAGGAGCCATGCATATTCACATGTATATATCCATGGTTTTCACTTGCAGATGG(((((.((((.((((((((((...((({{{={{{{{{{=={{{{{{{{((..(.(((.(((.(((....))).))).))).)..))))>>>>>>-->>>>>>>->>>>>)......)))))))....)))........)))))))))	TGCCTGGCTCCCTGTATGCCA(21) GCCTGGCTCCCTGTATGCCAT(1)	+	21	147	-66.6	-45.3061	0.009901
ptc-miRXX160e*	GCATGAGGGGAGTCGAGCAGG	13	92.86	scaffold_6	167696	167716	TGGCCTGCCTGGCTCCCTGAATGCCATCTAGGAAGCTTGTCAAAGAGTGTTGGCAACCTTTCTATTTGGCATGAGGGGAGTCGAGCAGGCCA(((({{{{={{{{{{{{{=={{{{{(..(((((((.(((((((......))))))).)))))))..))>>>>-->>>>>>>>>->>>>>)))	CTGCCTGGCTCCCTGAATGCC(2)	+	21	92	-59.7	-64.8913	0.009901
ptc-miRXX164	TGGAGAAGCAGGGCACGTGCA	37	92.5	scaffold_13	945104	945124	GCGGTTTACAATTGGGTGTGTAGCTCTTGCTGGAGAAGCAGGGCACGTGCAAGCTCTCTCCTCAGGCTTTCCTTGCACGTGCTCCCCTTCTCCAACATGGGTTTCTCACCTTTCCTC(.((.........(((((.(.(((((.((.<<<<<<<<--<<<<<<<<<<<((......((...)).....))))}}}}}}}}}==}}}}}}}}=}).))))).).)))))..)).)	CACGTGCTCCCCTTCTCCAAC(7)	-	21	117	-50.7	-43.3333	0.009901
ptc-miRXX166	TCGGACCAGGCTTCATTCCCC	2196	87.42	scaffold_8	10886861	10886881	AGTTGAGGGGAATGCTGTCTGGTTCGAGACCATTCACCTGAAGCGCACGCATTCATCTTTTGAGTGATCTCGGACCAGGCTTCATTCCCCCCAACT(((((.((((((((..(((((((((((((.((((((..((((((....)).)))).....)))))).))>>>>>>>>>>>-->>>>>>>>.)))))	NO	-	21	96	-54.3	-56.5625	0.009901
ptc-miRXX166a	AAGCCAAGGGTGACTTGCCTGA	28	96.55	scaffold_9	12179628	12179649	TGAGAGAAGAGAGGTCTAATATGAGGATCAGAGCCTTGTGTGGAAGCCAAGGGTGACTTGCCTGAGCATTTCAGGAAGGTTTCTATATGAAAGCTTTTTGTTAGTTTTGCAGGAAGTCAACCTCGGCTTTCCTGTAGTCTCTTCTTTCTCATGCTATGCCTTTCTCTTCTTCCA((..(((((((((((.((.((((((((..((((.((...(.((<<<<<-<<<-<<<<<<-<<<<-......(((((((.((((.....)))).))))))).........)))))))))).))).))))))))...)).))))...)))))))).)).)))..))))))))..))	NO	+	22	174	-70.89	-40.7414	0.009901
ptc-miRXX167h*	AGATCATGTGGCAGTTTCACC	173	93.01	scaffold_13	2408460	2408480	TCATGCACCGCTATTAGTTGAAGCTGCCAACATGATCTGAGCTTTCCTTAATTTTCCTATACAGGAAAGACTAGATCATGTGGCAGTTTCACCTATTGATGGTAGTATGG((((((((((.((.(((.(((((((((((.(((((((((..(((((((..............)))))))..)>>>>>>>>>>>>>>>>>>>->)).)).)))).))))))	NO	+	21	110	-52.24	-47.4909	0.009901
ptc-miRXX168a*	CCCGCCTTGCATCAACTGAAT	466	91.73	scaffold_3	4412276	4412296	TTACCGGCGGTCTCTGATTCGCTTGGTGCAGGTCGGGAACTGATTCGGCGATTTGATTGCCAGATGGCTCGACATGACTGGTTGTTGTGGAAAAAGAAAAGGAAGGAAACAGGAAAAAAAACAAAGAATAGCGAATTGGATCCCGCCTTGCATCAACTGAATCGGAGGCCGCGGTGA((((((.((((((((((({{{={{{{{{{{{{={{{{{=(..(((((.(..((((...(((....)))....((..((.....))..))...............(....)...........)))).....))))))..).)>>>>->>>>>>>>>>->>>>>)))))))))))))))	TCGCTTGGTGCAGGTCGGGAA(166)	-	21	177	-78.6	-44.4068	0.009901
ptc-miRXX168b*	CCCGCCTTGCATCAACTGAAT	466	91.73	scaffold_4	22942215	22942235	TTACCGGCGGTCTCTAATTCGCTTGGTGCAGGTCGGGAACTGATTCGGCGATTTGATTGCCAGATGGCTAAACACGATTGGCTGTGAGGCAAATTATAAAAAGAAAGAGAATTGGATCCCGCCTTGCATCAACTGAATCGGAGACCGCGGTGA((((((.(((((((..(({{{={{{{{{{{{{={{{{{=(..((((..(....((((((((..((((((((......))))))))..))).)))))......).....))))..).)>>>>->>>>>>>>>>->>>>>..)))))))))))))	TCGCTTGGTGCAGGTCGGGAA(166)	-	21	153	-72.8	-47.5817	0.009901
ptc-miRXX169d	CAGCCAAGGATGACTTGCCGG	212	83.46	scaffold_18	14350505	14350525	GGTGTAGGAGTTTTGCATGAAGAGGTAGAGAGTAGAATGCAGCCAAGGATGACTTGCCGGCATTTCCTCCCAGCTAGCTAGCAAGCCTTCTATTTGGCATGCCTGGCCGGCAGGATGTCCTTGGCTATATTTTGTTCTCTTCTTCTCATGTGAGACTCCAGGCC(((.(.(((((((..(((((.((((.(((((((((((((-<<<<<<<<<<<-<<<<<<<<(..........((....)).(((.(((........))).)))...))))))))).))))))))))).))))))))))))).)))))))))..)))))))).)))	NO	-	21	164	-87.8	-53.5366	0.009901
ptc-miRXX169e	CAGCCAAGGATGACTTGCCGA	569	74.67	scaffold_13	4145229	4145249	TCACTGTAACAGCCTTGCATGGAGGATCATAAAGATTGATGCAGCCAAGGATGACTTGCCGACGACTCGTTTTTGCTTCCATCAATATACGCATAATTAAGAAGAGATGAATCCGTTGGCAGGTTGTTCTTGGCTACATTTTTCTTTCTGCTCCTCATGCCAGGCTTATGGTGA((((((((..(((((.(((((.((((.((.(((((..((((-<<<<<<<<<--<<<<<<<<<((..((((((((.(((....................))).))))))))...)}}}}}}}}}}==}}}}}}}}}.))))..))))).)).))))))))).)))))))))))))	GTTGGCAGGTTGTTCTTGGCT(1) TGGCAGGTTGTTCTTGGCTAC(1) GGCAGGTTGTTCTTGGCTACA(89) GGCAGGTTGTTCTTGGCTAC(21)	+	21	174	-80.85	-46.4655	0.009901
ptc-miRXX169u*	GGCAGTCTCCTTTGGCTATCC	11	57.89	scaffold_15	12074305	12074325	ATGAGAGGAAGAGAGGCCTTGTATGGAGATGAAGAGCTAGAGGGTTGGGTAGCCAAGGACGACTTGCCTATTTCCTCCATGGGGTCCTGAAAAGAATGAAATACTGTCGTTCAGAGCTCATTGGTAGGGTTCATAGGCAGTCTCCTTTGGCTATCCTAACTGGCTCTCATTTTTCATGCTAGACCTACATCTCTTCTACAT(((((((((.((.(((.((.((((((((((((.(((((((......((({{{{{{{{{{={{{{={{{{{(.(((((((..(((..(((((.((.........))....)))))..)))..))).))))...)))>>>>>>>>>>->>>>>>>>>>...)))))))))).))))))))).)).)))...)))))))).…	TAGCCAAGGACGACTTGCCTA(1)	+	21	201	-88	-43.7811	0.009901
ptc-miRXX171	TGATTGAGCCGTGCCAATATC	207	88.84	scaffold_5	7776956	7776976	GGGATTGTTTACCGTGTTGAAATCATGTGGAAGAGTGACTATGATATTGGCCTGGTTCACTCAGATCACGACTTCAGAGCAAAGTGTCTTTCTTCTTCTTCTTTTTCTTCTTCTTCTTGTTTTATGTTCGTTTGATTTGATTGAGCCGTGCCAATATCTCAGTACTCTTTCATGTCTCTCCAAGTCGATCTCCAGAAACACTATTCC((((((((((.....(((((....(((((((((((((.((..(({{{{{{{={{{{{{{={{{{{((((((.(..(((((((..................................)))))))..).))))..))))>>>->>>>>>>->>>>>>>>>..))))))))))))))).........)))))...…	TATTGGCCTGGTTCACTCAGA(1)	+	21	207	-60.5	-29.2271	0.009901
ptc-miRXX171g*	TGATTGAGCCGTGCCAATATC	207	86.25	scaffold_12	11044679	11044699	GAGAAAGTGGGGGATGTTGGGATGGCTCAATCATGTCAAATCTCCCAAATTATGATGTTGGGTCTTTTAATCTGATTGAGCCGTGCCAATATCACACTTCTT(((((.(((...((({{{{{={{{{{{{{{{{{={{.(((...(((((.........)))))...))).)).>>>>>>>>>>>>->>>>>>>>.))))))))	GTTGGGATGGCTCAATCATGT(1)	+	21	102	-46.1	-45.1961	0.009901
ptc-miRXX171h*	TGATTGAGCCGTGCCAATATC	207	86.25	scaffold_15	11748131	11748151	GGTAAGTTCGGAGAAAGTGGGGGATGTTGGGATGGCTCAATCATATCAAATCTCCCAAACTATGATGTTGGGTCGTTTAATCTGATTGAGCCGTGCCAATATCACACTAACTATATATGATCC((...((....((..((((...((((((((.((((((((((((.((.((((..(((((.(......))))))..)))).)).>>>>>>>>>>>>->>>>>>>>.))))..))....))...))	NO	+	21	123	-48	-39.0244	0.009901
ptc-miRXX172	GGAATCTTGATGATGCTGCAT	8	80	scaffold_9	4502878	4502898	AAGATTATCAGTCTATATTGGCCGATGCGGCAGCATCAAGATTCACAAACTTTAAGGCTTGAGTTGGGGTGGTACACGGTCCCCTCCTTTACTCGAAAGGTTCCTTAATTTCTGATGGGAATCTTGATGATGCTGCATCGGCAAATATATGACTATTCTTCTT((((..(..((((((((((.(((((({{{{{{={{{{{{{{{{{={{....((((((.((((((.((((.((........)).))))...))))))......)))))).......))->>>>>>>>>>>->>>>>>>>)))).)))))).))))..)..))))	GCGGCAGCATCAAGATTCACA(3)	+	21	163	-67.9	-41.6564	0.009901
ptc-miRXX172b*	GGAGCATCATCAAGATTCACA	256	72.11	scaffold_9	1730227	1730247	TCGTTGTTTGCGGGTGGAGCATCATCAAGATTCACATGCAAATGCACGGCCGGTGATGTTAAGAGTTAAATCTTTCTTTGTTTCTGTTCATCTGCCAAAGTTCTTTGGAAGTGAGAATCTTGATGATGCTGCATCGGCAATAAACGA(((((..((((.(((<-<<<<<<<<<<<<<<<<-<<(.((((.((..(((.(((((.....((((.((((......)))).))))..))))).)))...))..))))...)}}=}}}}}}}}}}}}}}}}=}))).))))..)))))	TGAGAATCTTGATGATGCTGC(2) AGAATCTTGATGATGCTGCAT(249) AGAATCTTGATGATGCTGCA(1)	-	21	147	-60.6	-41.2245	0.009901
ptc-miRXX172h*	GGAGCACCATCAAGATTCACA	63	92.65	scaffold_8	3367126	3367146	GGTTACCAAGATCTAAAAGAATCGAAACCAGTCACTGTTTGCCGATGGAGCACCATCAAGATTCACAAACTTTATTAGGGCTAATAAGTGGTGATGATGGTGGCTTTTGGTGGTCCCTTCGTTTCAACCCAATAGCCATTTGAATTGGGAATCTTGATGATGCTGCAGCGGCAATAAATGGCTTATTTATCTCCCTTTTCATCTTTACC(((....(((((..(((((.....(((..(((((....((((((.(<-<<<<-<<<<<<<<<<<-<<(..((((....(((((....((...(((((.((.((((......)))))).)))))...))....)))))...)))))))=}}}}}}}}}}}=}}}}=}}=))))))....)))))..)))..…	GGAATCTTGATGATGCTGCAG(4) GAATCTTGATGATGCTGCAGC(1)	+	21	209	-66.8	-31.9617	0.009901
ptc-miRXX2111a	TTACCAATACCTCTCATGCCAA	39	61.9	scaffold_5	11901582	11901603	GAGAAGAGCCGGAGGGGGAGACTGAGACCTACTGGAAGTTGTGGGCATGAGGTGTTTGGCAAGAAAATGGATCTTTTCCTTATGATGATTTCTTACCAATACCTCTCATGCCAATGATTTCCAGCAGTTCCTCCCTTTCCCTTCTTTCTC((((((((..((((((((((((((.......((((((((..(.(((((((((.((((((.((((((..(((.....))).........))))>>->>>>->>->>>>>>>>>->..))))))))))))..)))))))))).))).)))))	NO	-	22	150	-62.71	-41.8067	0.009901
ptc-miRXX390d*	CGCTATCCATCCTGAGTTTTA	155	77.89	scaffold_16	12564514	12564534	GGCTTGATATATAGAAGTATGGAAGAATCTGTTAAGCTCAGGAGGGATAGCGCCCTAAGGATAACCATGGGCTCTTTTTATTTGGTTTTTGACTATCAGTGGCGCTATCCATCCTGAGTTTTACTGGTTCTTCTTGCTACGATCAGCT((((.(((.....(.((((.(((((((((.((={{{{{{{{{{={{{{{{{{{(((...((((..((..((((..........))))..))..)))))).))>>>>>>>>->>>>>>>>>>->).))))))))))))).).)))))))	TAAGCTCAGGAGGGATAGCGC(39) AAGCTCAGGAGGGATAGCGCC(126)	+	21	148	-62.4	-42.1622	0.009901
ptc-miRXX393*	ATCATGCTATCCCTTTGGATT	11	40.74	scaffold_10	17888043	17888063	GCAACTAGAGGAGGCATCCAAAGGGATCGCATTGATCCCGAGTGTCCCTGGCCATAATTTTGGATCATGCTATCCCTTTGGATTCCTCCTTTGGTGGC((.(((((((((((.((((((((((((.((((.(((((.((((.............)))).))>>>>>>>->>>>>>>>>>>>-))))))))))).))	NO	-	21	98	-54.32	-55.4286	0.009901
ptc-miRXX393a*	ATCATGCTATCCCTTTGGATT	11	39.29	scaffold_8	3747134	3747154	ATGTTTTTACTGCAACTAGAGGAGGCATCCAAAGGGATCGCATTGATCCCAAGTGTCTGTCCCCCATAATTTTGGATCATGCTATCCCTTTGGATTCCTCCTTTGGTGGCTTCTATAACAT(((((......((.(((((((((((.((((((((((((.((((.(((((.((((...((.....))..)))).))>>>>>>>->>>>>>>>>>>>-))))))))))).))......)))))	NO	+	21	121	-58	-47.9339	0.009901
ptc-miRXX395	CTGAAGTGTTTGGGGGAACTC	42	65.62	scaffold_761	162	182	ATCAAGTGTCCCCTAGAGTTCCTCTGAGCACTTCATTGGGGATCTTCCATCGACCTGAGAGAGTATTATCATTCCTACTGAAGTGTTTGGGGGAACTCCTGGTGTCATTTGAT((((((((.(.((..(({{{{{{{=={{{{{{{{{={{(((((((..((......))..))).........))))))->>>>>>>>>-->>>>>>>>>..)).).))))))))	GTTCCTCTGAGCACTTCATTG(9)	+	21	113	-52.8	-46.7257	0.009901
ptc-miRXX395a	CTGAAGTGTTTGGGGGAACTC	42	95.45	scaffold_761	7013	7033	GAAACGCAAAGAACGTTAGCTGTCCCCCGGAGTTTCCCTGACCACTTCACTGGGGCTATAATTCTACTCTTCGTGTTCAAGGGTAGTGGCAACCCTTCCTCACTGAAGTGTTTGGGGGAACTCTGGGTGGCATTTGACACTGTTTAGCAGTC((...(((((.(..(((((.((((.(({{{{{{{{{{{=={={{{{{{(.(((((........((((((((.......)))))))).(....)....)))))->>>>>>>->-->>>>>>>>>)))).)))).)))))..).))).))..))	CGGAGTTTCCCTGACCACTTC(1) GTTTCCCTGACCACTTCACTG(3)	-	21	152	-64.4	-42.3684	0.009901
ptc-miRXX395b	CTGAAGTGTTTGGGGGAACTC	42	95.45	scaffold_792	1141	1161	GAAACGCAAAGAACGTTAGCTGTCCCCCGGAGTTTCCCTGACCACTTCACTGGGGCTATAATTCTACTCTTCGTGTTTAAGGGTAGAGGCAACCCTTCCTCACTGAAGTGTTTGGGGGAACTCTGGGAGGCATTTGACACTGTTTAGCATTC(((..(((((.(..(((((.((((.(({{{{{{{{{{{=={={{{{{{(.(((((......((((((((((.......)))))))))).........)))))->>>>>>>->-->>>>>>>>>)))).)))).)))))..).))).)).)))	CGGAGTTTCCCTGACCACTTC(1) GTTTCCCTGACCACTTCACTG(3)	+	21	152	-66.76	-43.9211	0.009901
ptc-miRXX396	TTCCACAGCTTTCTTGAACTT	2406	93	scaffold_6	4643011	4643031	GAAAGTCCTGGTCATGCTTTTCCACAGCTTTCTTGAACTTCCTTGCCATGCTTAACTTGTGTGTGTGTATAGATCACTATATATCTGTATAGTTATACACATTTAGCTAGCTAGCACCATTGAAGCTCAAGAAAGCCGTGGGAGAACATGGCAACTCAGGATTTTT((((((((((((((((.((<<<<<<-<<<<<<<<<<-<<<(..((...((((...((.((..(((((((((....(((((((....))))))))))))))))...)).))..)))).))..)}}}=}}}}}}}}}}=}}}}}})).))))))....))))))))))	AAGCTCAAGAAAGCCGTGGGA(4) GCTCAAGAAAGCCGTGGGAGA(46) CTCAAGAAAGCCGTGGGAGAA(1) CTCAAGAAAGCCGTGGGAGA(47)	-	21	166	-70.5	-42.4699	0.009901
ptc-miRXX396g*	CTCAAGAAAGCCGTGGGAAAA	188	49.74	scaffold_7	6411639	6411659	TAAGGTCGTTGCATGCTTTTCCACGGCTTTCTTGAACTTGGCACTCAAGAGACATGAGAGTAAAGGGCTAGGCTTTCTTTTCTATTCCTTTCGTTCTTTGAAATTTTCCTGTTCAAAGAATCCATACATATCAGTCTCTTTAGTACAAAGCTCAAGAAAGCCGTGGGAAAATATGAAAGGATTTTG(((((((.((.((((.({{{{{{{{{{{{{{{{{{={{(.(.(((.(((((((.(((....(((((..((((........))))..))))).((((((((((.........)))))))))).........)))))))))).))).).)))->>>>>>>>>>>>>>>>>>>-)))).)).)))))))	TTTCCACGGCTTTCTTGAACT(12) TTCCACGGCTTTCTTGAACTT(64)	-	21	186	-72	-38.7097	0.009901
ptc-miRXX398	TGTGTTCTCAGGTCGCCCCTG	5	35.71	scaffold_1	26837937	26837957	TGTAAAAGGGTTCCGACAGGAGCGGCCTTGGCTCACATGTGGCGGCATCCAATGTACTTCATGTGTTCTCAGGTCGCCCCTGCCGGGCTTCCTCTACA((((..((((.((((.((((.(((((((.((..((((((.((..((((...)))).)).))>>>>-->>->>>>>>>->>>>.))))..)))).))))	NO	-	21	98	-42.5	-43.3673	0.009901
ptc-miRXX398c*	GGAGCGACCTGAAATCACATG	324	83.72	scaffold_9	6795813	6795833	GTGGAGGATTCCTACAGGAGCGACCTGAAATCACATGTGGGCTGCACCCTCCTGGGTTATCTTGAGCAACATGTGTTCTCAGGTCGCCCCTGCCGGGCTTTCCTCCAT((((((((..(((.((<<-<<<<<<<<<---<<<<<<(..(((.(((((....))))......)))}=}}}}}}}===}}}}}}}}}.))))..)))...))))))))	CAACATGTGTTCTCAGGTCGC(1) ACATGTGTTCTCAGGTCGCCC(5) CATGTGTTCTCAGGTCGCCCC(4) TGTGTTCTCAGGTCGCCCCTG(5) TGTGTTCTCAGGTCGCCCCT(1) GTGTTCTCAGGTCGCCCCTG(2)	-	21	108	-57.6	-53.3333	0.009901
ptc-miRXX408*	CGGGGAACAGGCAGAGCATGG	107	84.25	scaffold_2	14802211	14802231	AGGGATCGTGGGGAGAGGGAGCAGAGACAGATGAAGACGGGGAACAGGCAGAGCATGGATGGAGCTACTAACAGAAGTACTTGTTTTGGCTCTACCCATGCACTGCCTCTTCCCTGGCTTGTGGCTCTTCCTTTTCTCCTCCCT(((((....(((((((((((..((((.((.(.(....<<<<<<<-<<<<<<-<<<<<<.((((((((..(((((......))))).)))))))).)))}}}=}}}}}}=}}}}}}}=}=).)).))))))))))))))))))))	TGCACTGCCTCTTCCCTGGCT(33)	+	21	144	-76.2	-52.9167	0.009901
ptc-miRXX477	ATCTCCCTCAAAGGCTTCCTCT	10	52.63	scaffold_15	12480569	12480590	ATGCTACTACATGGATGGAGAAGCTTCCGATCTCCCTCAAAGGCTTCCTCTATAATTGCCTTACATGATGGCATTAGTGGACTCCTTTGGGGAGATGGAGAGCTTACTCCCCATAACTCAATGGCAT((((((....((((..(((((((((..(.<<<<<<<-<<<<<<--<<<-<<(....((((.........)))).)))=}}}==}}}}}}}}}}}}}=}..))))).)))))))).......))))))	TGGACTCCTTTGGGGAGATGG(8)	+	22	127	-56.6	-44.5669	0.009901
ptc-miRXX482	TCTTTCCGAGTCCTCCCATACC	338	89.66	scaffold_17	13549443	13549464	TCCTCCGCCGTGTTGGAAAGGAAAGGGAGACTGCTTTACTGGAAGCTTCCGGTATGGGAGAGGCGGGAATGACTCTGAAAGAACTTAGAAGAGTCTTTCCGAGTCCTCCCATACCGCAGATTTCCAGTAGTTCCTCCCTTTACTTATCTTCACTATTCCAGCAGCTCTGGA(((...((..(((((((((((((((((((...(((..((((((((((..(((((((((((.(((.((((.((((((.............))))>>->>>>-->>>>>>>>>>>>>).)).)))))))))))..)))))))).)))..........))))))))))...)))	NO	-	22	171	-76.02	-44.4561	0.009901
ptc-miRXX828	TCTTGCTCAAATGAGTATTCCA	33	89.19	scaffold_12	2050518	2050539	TCTCTTTTTAATGTTTCTTGCTCAAATGAGTATTCCAACAGCAGTAGCCTTATGCAACAAGAGCATATATTTTTTACTTGTATCACTGTAATATGATGTTGCTGGAATGCTACTGTTTCTGAGATGCTCATTTGAGCAAGTAATATTAGAAGATGA((..(((((((((((-<<<<<<<<<<<<<<<<<--<<..(((((((((.((..((((((....(((((......(((..........)))))))).))))))...)).)))))))))..))..))))))))))))))))).)))))))))))..))	NO	-	22	156	-61.4	-39.359	0.009901
ptc-miRXX828a	TCTTGCTCAAATGAGTATTCCA	33	86.84	scaffold_15	776063	776084	CCTCTTTGTAATGTTTCTTGCTCAAATGAGTATTCCAACAACAGTAGCCTTTTGAACAAGAACATATGTTTTTGCCTTGTATGGTTATGATGTTGCTGGTATTTACTGTTTCTGAGATGCTCATTCGAGCAAGAAATATTAGAAGAGG(((((((.(((((((<<<<<<<<-<<<<<<<<<--<<..((((((((((.......(((((((....)))))))((......)).............)))...)))))))..))..))))))))).))))))))))))))))))))))	NO	+	22	148	-58.6	-39.5946	0.009901
Alignment of all pooled smallRNA reads and miRNA hairpins.
Schematic of folding structure as produce by RNAfold is shown below hairpin. Location of miRNA in hairpin is indicatd by '<' or '>' symbol. Brackets '{' or '}' indicate the position of matched nucleotides in miRNA*. '-' and '=' are mismatches in miRNA and miRNA*, respectively. Dots '.' are mismatches in non-miRNA portion of hairpin.
ptc-miR1444a
ttcgagtttatcacttgaatgttgaccgaatatggatgaaaagttgttttctgtttcctttccTCCACATTCGGTCAATGTTCCagtgatgagcatgaa 242
((((.((((((((((.{{{{{{{{{{{{{{{={{{{=((((.(..(........)..))))).>>>>->>>>>>>>>>>>>>>-)))))))))).))))
gaatgttgaccgaatatggatg 1
gaatgttgaccgaatatggat 2
gaatgttgaccgaatatggatga 1
gaatgttgaccgaatatggatgaa 2
aatgttgaccgaatatggat 2
atgttgaccgaatatggatga 1
gaccgaatatggatgaaaagttg 1
accgaatatggatgaaaagtt 1
accgaatatggatgaaaagttgtttt 1
tttctgtttcctttcctccacattcggtca 1
tcctccacattcggtcaatgttcc 3
cctccacattcggtcaatgttcca 4
cctccacattcggtcaatgtt 2
ctccacattcggtcaatgttccag 2
ctccacattcggtcaatgttcc 3
ctccacattcggtcaatgttc 4
TCCACATTCGGTCAATGTTCC 198 miRNA
tccacattcggtcaatgttcca 6
tccacattcggtcaat 1
ccacattcggtcaatgttcca 6
ptc-miR1444b
tcgaatatttccttgtttatccctcgaatattgatcgaatatgtatgaaatatgatggttatatgtttcattCACATTCGGTCAACGTTCGAGtgataaacagaaataattgg 130
((((.((((((..(((((({{={{{{{{=={{{{{{{{{{.((.((((((((((.......)))))))))).>>->>>>>>>>>>-->>>>>>.)))))))))))))).))))
tccctcgaatattgatcgaat 4
ctcgaatattgatcgaatatgt 1
ctcgaatattgatcgaatatgtat 1
ctcgaatattgatcgaatatg 6
cgaatattgatcgaatatgtatg 2
cgaatattgatcgaatatgtatga 44
cgaatattgatcgaatatgt 1
cgaatattgatcgaatatg 1
cgaatattgatcgaatatgtat 3
cgaatattgatcgaatatgta 6
cgaatattgatcgaatatgtatgaa 1
gatcgaatatgtatgaaatatgatggtta 1
gatcgaatatgtatgaaatatgatg 2
gatcgaatatgtatgaa 1
tgtttcattcacattcggtcaacg 1
ttcacattcggtcaacgttcg 1
cacattcggtcaacgtt 1
CACATTCGGTCAACGTTCGAG 23 miRNA
acattcggtcaacgttcgagt 5
cattcggtcaacgttcgagtg 20
attcggtcaacgttcgagtga 1
attcggtcaacgttcgagtg 1
tcggtcaacgttcgagtgata 2
gtcaacgttcgagtgataaacaga 1
ptc-miR1444c
tcgaatatttccatttttatccctcgaatattgatcgaatatgtatgaaatatgatggttaaatgtttcattCACATTCGGTCAACGTTCGAGtgataaacagaaataattgg 130
((((.((((((....(((({{={{{{{{=={{{{{{{{{{.((.(((((((((.........))))))))).>>->>>>>>>>>>-->>>>>>.))))))..)))))).))))
tccctcgaatattgatcgaat 4
ctcgaatattgatcgaatatgt 1
ctcgaatattgatcgaatatgtat 1
ctcgaatattgatcgaatatg 6
cgaatattgatcgaatatgtatg 2
cgaatattgatcgaatatgtatga 44
cgaatattgatcgaatatgt 1
cgaatattgatcgaatatg 1
cgaatattgatcgaatatgtat 3
cgaatattgatcgaatatgta 6
cgaatattgatcgaatatgtatgaa 1
gatcgaatatgtatgaaatatgatggtta 1
gatcgaatatgtatgaaatatgatg 2
gatcgaatatgtatgaa 1
tgtttcattcacattcggtcaacg 1
ttcacattcggtcaacgttcg 1
cacattcggtcaacgtt 1
CACATTCGGTCAACGTTCGAG 23 miRNA
acattcggtcaacgttcgagt 5
cattcggtcaacgttcgagtg 20
attcggtcaacgttcgagtga 1
attcggtcaacgttcgagtg 1
tcggtcaacgttcgagtgata 2
gtcaacgttcgagtgataaacaga 1
ptc-miR1446a
ggatgttgaagatccaacttcttcTGAACTCTCTCCCTCAACCGCTactctagagcttggcaatccttgtcgattgtttctgtgtagcggttgaggtgaggggttcagaacatgttggcttcgatgattc 325
(((((((((((..(((((...(((<<<<<<<-<<<<<<<<<<<<<<((.(..((((((((((.....))))))..))))..).))))))))))))).)))))))))))))...)))))))))))).))))
ttctgaactctctccctcaa 5
ttctgaactctctccctcaac 42
ttctgaactctctccctcaacc 7
tctgaactctctccctcaacc 2
tctgaactctctccctcaac 1
ctgaactctctccctcaaccgc 1
TGAACTCTCTCCCTCAACCGCT 249 miRNA
tgaactctctccctca 9
tgaactctctccctcaaccgc 5
tgaactctctccctcaac 1
tgaactctctccctcaaccgcta 1
gaactctctccctcaaccgct 2
ptc-miR1446c
gaatgttggaaatccaactttTTCTGAACTCTCTCCCTCAACtgctattctagagcttcctgagctaacccttgtgtttctgtgtagcagtcaaggtgggaggctcagaaaatgttggtttcttagcttttc 77
(((.((((((((.(((((.((<<<<<<-<-<<<<<<<<--<<((((((.(..((((....((((......)))).))))..).))))))))..))).)))))).)))))))).))))))))).))))..)))
ttctgaactctctccctcaa 5
ttctgaactctctccctcaact 16
TTCTGAACTCTCTCCCTCAAC 42 miRNA
tctgaactctctccctcaact 1
tctgaactctctccctcaac 1
ctgaactctctccctcaactg 1
tgaactctctccctcaactgct 1
tgaactctctccctca 9
tgaactctctccctcaac 1
ptc-miR1446e
gtatcagaatgttggtgatccaactttTTCTGAACTCTCTCCCTCAACtgctattctagagcttgttaatccttgtcaagtgtttccctgtagcagtcgaggcgagggggtttcggaaaatgttggctcctcagctcttaattac 77
(((.......(((((.((.(((((.((<<<<<<<<<<<<<<<<<<-<<((((((......(((((...........)))))........)))))))).)))).))))))).))))))))).))))).)).))))).......)))
ttctgaactctctccctcaa 5
ttctgaactctctccctcaact 16
TTCTGAACTCTCTCCCTCAAC 42 miRNA
tctgaactctctccctcaact 1
tctgaactctctccctcaac 1
ctgaactctctccctcaactg 1
tgaactctctccctcaactgct 1
tgaactctctccctca 9
tgaactctctccctcaac 1
ptc-miR1447
gtgaacgaaggaggccctaatcagggcactgcaattctaaatgtctgttggcaagtggcgatgccagacgtttgaaatttacttatcatttattagtCAGAATTGCAGTGCCTTGATTtgggctttgtctgttcc 764
(.(((((.(.(((((((.(({{{{{{{{{{{{{{{{{{{{{(((((...((((........)))))))))))).......(((...........)))->>>>>>>>>>>>>>>>>>>>.))))))).).))))))
ctaatcagggcactgcaattctaa 1
tcagggcactgcaattctaaa 24
tcagggcactgcaattctaaat 8
tcagggcactgcaattctaa 2
agtcagaattgcagtgccttgatt 1
cagaattgcagtgccttg 1
cagaattgcagtgcct 15
cagaattgcagtgccttgattt 3
cagaattgcagtgccttgat 2
CAGAATTGCAGTGCCTTGATT 651 miRNA
cagaattgcagtgcctt 55
aattgcagtgccttgatt 1
ptc-miR1448
aggagcaagagggaaaggaaagagggttgctgggagttacgggtatgggaggattggacagtactgcttggttttaattaaccaaagtctgtTCTTTCCAACGCCTCCCATACCggtaatctccagctgtttcctccctttcccttgcttgtcct 9628
((((.(((((((((((((...(((((..(((((..((({{={{{{{{{{{{{={{{{{={(.((.((((((((......)))).))))..))->>->>>>>-->>>>>>>>>>>.)))))..)))))....))))))))))))))..))))))))
tgctgggagttacgggtatgggag 5
ttacgggtatgggaggattgg 1
acgggtatgggaggattggaca 6
acgggtatgggaggattggacag 7
acgggtatgggaggattggacagt 4
cgggtatgggaggattggacag 1
gggtatgggaggattggacagtac 2
gggtatgggaggattggacagta 4
ggtatgggaggattggacagt 5
gtatgggaggattggacagtac 3
gtatgggaggattggacagta 31
gtatgggaggattgga 1
tatgggaggattggacagta 6
tatgggaggattggacagtact 10
tatgggaggattggacagtac 3
tatgggaggattggacag 14
tatgggaggattggaca 1
aaagtctgttctttccaa 1
aagtctgttctttccaa 2
tgttctttccaacgcctcccatacc 1
ttctttccaacgcctcccataccg 1
ttctttccaacgcctcccatacc 1
tctttccaacgcctcccatac 56
tctttccaacgcctccc 3
tctttccaacgcctcccataccggt 1
tctttccaacgcctcc 91
TCTTTCCAACGCCTCCCATACC 7653 miRNA
tctttccaacgcctcccata 5
tctttccaacgcctccca 5
ctttccaacgcctcccatac 14
ctttccaacgcctccc 20
ctttccaacgcctcccataccgg 1
ctttccaacgcctcccatacc 198
ctttccaacgcctcccataccg 1160
tttccaacgcctcccatac 3
tttccaacgcctcccatacc 2
tttccaacgcctcccataccggtaa 3
tttccaacgcctccca 3
tttccaacgcctcccataccgg 6
tttccaacgcctcccataccggta 1
tttccaacgcctcccataccg 21
tttccaacgcctcccataccggt 3
tccaacgcctcccataccggtaat 1
ccaacgcctcccataccggtaa 1
aacgcctcccataccggtaatc 1
gcctcccataccggtaatctc 1
cccataccggtaatctccagctgtttcc 1
cccataccggtaatctccagct 2
cccataccggtaatctc 1
cccataccggtaatctccagctgttt 3
cccataccggtaatctccagctgt 117
cccataccggtaatctccagctgtt 9
cccataccggtaatctccagctg 3
cccataccggtaatct 6
cataccggtaatctccagctgt 2
cataccggtaatctccagctgtt 1
accggtaatctccagctgtttcctccc 1
ccggtaatctccagctgtttcctccc 2
cggtaatctccagctgtttcctccct 1
cggtaatctccagctg 1
cggtaatctccagctgtttcctccc 5
cggtaatctccagctgtttcctcc 3
ggtaatctccagctgtttcctccc 89
ggtaatctccagctgtttcctccct 2
ggtaatctccagctgtttcctcc 3
ggtaatctccagctgt 4
gtaatctccagctgtttcctccc 8
gtaatctccagctgtttcctccct 1
ptc-miR156a
gagggacacaaaagaaagacTGACAGAAGAGAGTGAGCACAcacgaaagtatatggtatgaaggcattccattgcagggtgtgtgctcacatctcttctgtcagcttccacttccaagtgtttcctc 280
(((((((((..(((.(((.(<<<<<<<<<<<<<<<<<<<<<(((....(((.((((.(((....))).)))))))...)))))))))))).))))))))))))))))...)))....))).))))))
ctgacagaagagagtgagcac 10
ctgacagaagagagtgagca 1
tgacagaagagagtgagca 5
tgacagaagagagtgagcac 81
tgacagaagagagtgagcacac 1
TGACAGAAGAGAGTGAGCACA 153 miRNA
tgacagaagagagtga 1
gacagaagagagtgagcacac 4
gacagaagagagtgagcaca 1
acagaagagagtgagcacaca 2
acagaagagagtgagcacac 3
gtgctcacatctcttctgtcag 3
tgctcacatctcttctgtcagc 15
ptc-miR156b
agaatcgagggttttaagggtaagggaggTGACAGAAGAGAGTGAGCACAcagggtactttcttgcatgacatccatgcttgaaactttgcgtgctcactctctatctgtcaccccaccaccatctctctctctttctcttcccctttccctgtct 257
(((....((((....(((((.((((((((<<<<<<<<<<<<<<<<<<<<-((((((...(((..(((((.....)))))..))))))))).))}}}}}}}}}}}=}}}}}}}}}.....................)))))).))))).)))).)))
tgacagaagagagtgagca 5
tgacagaagagagtgagcac 81
tgacagaagagagtgagcacac 1
TGACAGAAGAGAGTGAGCACA 153 miRNA
tgacagaagagagtga 1
gacagaagagagtgagcacac 4
gacagaagagagtgagcaca 1
acagaagagagtgagcacaca 2
acagaagagagtgagcacac 3
gctcactctctatctgtcacc 5
gctcactctctatctgtcaccc 1
ptc-miR156c
ttctggacattagaaacTGACAGAAGAGAGTGAGCACAcagaggcatatttgtataaatctataccattgcttttgcgtgctcacttctcattctgtcagcttccagag 360
(((((((....((...(<<<<<<<<<<<<<<<<<<<<-((((((((.....(((((....)))))...)))))))).)))))))).)))).))))))))))))))))))
ctgacagaagagagtgagcac 10
ctgacagaagagagtgagca 1
tgacagaagagagtgagca 5
tgacagaagagagtgagcac 81
tgacagaagagagtgagcacac 1
TGACAGAAGAGAGTGAGCACA 153 miRNA
tgacagaagagagtga 1
gacagaagagagtgagcacac 4
gacagaagagagtgagcaca 1
acagaagagagtgagcacaca 2
acagaagagagtgagcacac 3
gtgctcacttctcattctgtca 1
gctcacttctcattctgtcagctt 1
gctcacttctcattctgtcagc 54
gctcacttctcattctgtcagct 41
gctcacttctcattct 1
ptc-miR156d
gattcgagggttttaagggtaagtgagtTGACAGAAGAGAGTGAGCACAcagggtactttcttgcatgacgttcatgcttgaagctttgcgtgcccaccctctatctgtcaccccatcaccatctctccttctcttcccctttccttgcctgtc 254
(((.((((((....(((((.(((.(((.<<<<<<<<<<<-<<<-<<<<-((((((...(((..(((((.....)))))..))))))))).))}}=}}}=}}}}=}}}}}}}==................))).))).)))))))))))...)))
ttgacagaagagagtgagcac 2
tgacagaagagagtgagca 5
tgacagaagagagtgagcac 81
tgacagaagagagtgagcacac 1
TGACAGAAGAGAGTGAGCACA 153 miRNA
tgacagaagagagtga 1
gacagaagagagtgagcacac 4
gacagaagagagtgagcaca 1
acagaagagagtgagcacaca 2
acagaagagagtgagcacac 3
gcccaccctctatctgtcacc 1
ptc-miR156f
gagggtcacaagagaaagacTGACAGAAGAGAGTGAGCACAcacgaaagctaattgtatgaaagcataccattgcagggtgtgtgctcacttctcttctgtcagcttacatttgccagtgtttcctc 408
(((((.(((.(((..(((.(<<<<<<<<<<<<<<<<<<<<<(((....((.(((.(((((....))))).)))))...))))}}}}}}}}=}}}}}}}}}}}}))))...)))....)))..)))))
ctgacagaagagagtgagcac 10
ctgacagaagagagtgagca 1
tgacagaagagagtgagca 5
tgacagaagagagtgagcac 81
tgacagaagagagtgagcacac 1
TGACAGAAGAGAGTGAGCACA 153 miRNA
tgacagaagagagtga 1
gacagaagagagtgagcacac 4
gacagaagagagtgagcaca 1
acagaagagagtgagcacaca 2
acagaagagagtgagcacac 3
gtgctcacttctcttctgtcag 7
gtgctcacttctcttctgtca 3
tgctcacttctcttctgtcag 3
tgctcacttctcttctgtcagc 125
tgctcacttctcttctgtca 1
tgctcacttctcttct 2
tgctcacttctcttctgtcagct 2
tgctcacttctcttctgtc 1
gctcacttctcttctgtcagc 2
ptc-miR156g
ttgaattatgtgaggaggcactggtgatgttgTTGACAGAAGATAGAGAGCACagatgatgaaatgcatggagcttaattgcatctcactcctttgtgctctctagtcttctgtcatcaccttcagcccctcactccgtttaa 474
((((((...((((((.(((...(((((.....-<<<<<<<<<<<<<<<<<<<<(((.(((((.(((((...........))))).))).)).)))))}}}}}}}=}}}}}}}}}}}}})))....)))))))))...))))))
ttgacagaagatagagag 3
ttgacagaagatagagagcaca 7
ttgacagaagatagagagca 11
TTGACAGAAGATAGAGAGCAC 386 miRNA
ttgacagaagatagag 10
ttgacagaagatagaga 1
tgacagaagatagagagcaca 1
tgacagaagatagagagcac 7
tgacagaagatagagagca 1
acagaagatagagagc 1
gctctctagtcttctgtcat 1
gctctctagtcttctgtcatc 21
gctctctagtcttctgtcatca 12
gctctctagtcttctg 2
gctctctagtcttctgtc 10
ptc-miR156h
gtgaaggaggcactggtgatgctgTTGACAGAAGATAGAGAGCACtgacgatgaaatgcatggagcttaattgcatctcactcctttgtgctctctagtcttctgtcatcaccttcagcccttcac 503
(((((((..((...(((((.....-<<<<<<<<<<<<<<<<<<<<.((.(((((.(((((...........))))).))).)).)).))}}}}}}}=}}}}}}}}}}}}})))....)))))))))
ttgacagaagatagagag 3
ttgacagaagatagagagca 11
TTGACAGAAGATAGAGAGCAC 386 miRNA
ttgacagaagatagag 10
ttgacagaagatagagagcact 36
ttgacagaagatagaga 1
tgacagaagatagagagcac 7
tgacagaagatagagagca 1
tgacagaagatagagagcact 1
acagaagatagagagc 1
gctctctagtcttctgtcat 1
gctctctagtcttctgtcatc 21
gctctctagtcttctgtcatca 12
gctctctagtcttctg 2
gctctctagtcttctgtc 10
ptc-miR156i
gggagttgtgtggagaggaggcacttgtgatgttgTTGACAGAAGATAGAGAGCACagatgatgttttgcagtagactctggatctcactcctttgtgctctctatgcttctgccatcaccttcagccccgacccccagtcccc 511
(((..(((.(.((...((.(((....((((((...--<-<<<<<<<<<<<<<<<<<(((.((((...(.(((......))).)...)).)).)))))))))))))).))))))))))))).....)))))...))))))..)))
ttgacagaagatagagag 3
ttgacagaagatagagagcaca 7
ttgacagaagatagagagca 11
TTGACAGAAGATAGAGAGCAC 386 miRNA
ttgacagaagatagag 10
ttgacagaagatagaga 1
tgacagaagatagagagcaca 1
tgacagaagatagagagcac 7
tgacagaagatagagagca 1
acagaagatagagagc 1
cctttgtgctctctatgcttct 1
ctttgtgctctctatgcttctg 1
gctctctatgcttctg 11
gctctctatgcttctgccatc 63
gctctctatgcttctgc 1
gctctctatgcttctgccat 1
gctctctatgcttctgccatca 5
ptc-miR156j
gggggagaaggaggcactggtgatgttgTTGACAGAAGATAGAGAGCACagatgatgatatgcaatggactctgcatcccactcctttgtgctctctatgcttctgtcatcactttcagccccgaccccctcctcctcctcctcc 652
(((((((.((((((....((((..((((-<<<<<<<<<<<<<<<<<<<<(((.((((..(((((........)))))..)).)).)))}}}}}}}}}}}=}}}}}}}}}.......))))..).)))....)))))).)))))))
ttgacagaagatagagag 3
ttgacagaagatagagagcaca 7
ttgacagaagatagagagca 11
TTGACAGAAGATAGAGAGCAC 386 miRNA
ttgacagaagatagag 10
ttgacagaagatagaga 1
tgacagaagatagagagcaca 1
tgacagaagatagagagcac 7
tgacagaagatagagagca 1
acagaagatagagagc 1
cctttgtgctctctatgcttct 1
ctttgtgctctctatgcttctg 1
gtgctctctatgcttctgtca 1
gctctctatgcttctg 11
gctctctatgcttctgtcatc 106
gctctctatgcttctgt 1
gctctctatgcttctgtcatca 42
gctctctatgcttctgtc 56
gctctctatgcttctgtcat 5
ptc-miR160a
agaagaaggtgacatgggttaTGCCTGGCTCCCTGTATGCCAcaagcaaagaccaatcttttgttttagattggctgttgccggtggcgtgcgaggagccaagcatactctctctttctct 46
(((.(((((.((...((((.(<<<-<<<<<<<-<<<<<<<<<(..((((((.(((((((........))))))))).))))..)))}}}}}}}=}}}}}}}=}}}}}))))).))))))))
tgcctggctccctgta 1
tgcctggctccctgtatgccac 11
TGCCTGGCTCCCTGTATGCCA 21 miRNA
gcctggctccctgtatgccac 3
cctggctccctgtatg 1
gcgtgcgaggagccaagcata 9
ptc-miR160d
gcatcgaagaaggaggtgaaatgggttaTGCCTGGCTCCCTGTATGCCAcagcaaagaccaatctcttctgtcttagattggctgctgccggtggcgtgcgaggagccaagcatactctctcctttctatctctatgt 46
((((.((.((((((((.((...((((.(<<<-<<<<<<<-<<<<<<<<<(.(((.((.(((((((..........)))))))))..)))..)))}}}}}}}=}}}}}}}=}}}}})))..)))))))).)))).))))
tgcctggctccctgta 1
tgcctggctccctgtatgccac 11
TGCCTGGCTCCCTGTATGCCA 21 miRNA
gcctggctccctgtatgccac 3
cctggctccctgtatg 1
gcgtgcgaggagccaagcata 9
ptc-miR162a
ggtggttgggaagacactggaggcagcggttcatcgatctcttcctggccaattttttgtttagcacgaaaaacatgaaccgaTCGATAAACCTCTGCATCCAGcgcttcctttattcccc 186
((.((..((((((.(.(((((.((((.((((.(((((((..(((.((.....((((((((.....)))))))))).)))..))>>>>>->>>>->>>>->>>>>.))))))).....))))
gttgggaagacactggaggca 2
gaaccgatcgataaacctctg 1
tcgataaacctctgca 4
TCGATAAACCTCTGCATCCAG 166 miRNA
tcgataaacctctgcatccagc 1
tcgataaacctctgcatcca 9
cgataaacctctgcatccag 3
ptc-miR162b
atgtaaagaagagattgcttttgagtttggttgagaagacactggaggcagcggttcatcgatcttttcctgaagatttttttgttttacacgaacaacacgaaccgaTCGATAAACCTCTGCATCCAGtgcttcccttactccacttttttttcttttcat 216
(((.((((((((((..(.....((((..((....((((.(((((((.((((.((((.(((((((..(((.((.........((((((.....)))))))).)))..))>>>>>->>>>->>>>->>>>>))))))))..))))..)..)))))))))).)))
gaaccgatcgataaacctctg 1
tcgataaacctctgca 4
tcgataaacctctgcatccagt 33
TCGATAAACCTCTGCATCCAG 166 miRNA
tcgataaacctctgcatcca 9
cgataaacctctgcatccag 3
ptc-miR164a
gggcgagcggttccttgcTGGAGAAGCAGGGCACGTGCAaaatcctgatgaagtgcttacactttgcacgcgctcttcttctccaacacgggctcctcacct 46
(((.(((.(((.((.((.<<<<<<<<-<<<<<-<<<<<<(...........((((....)))))))}}}}=}}}}}=}}}}}}}}=}).))))).))).)))
tggagaagcagggcac 2
TGGAGAAGCAGGGCACGTGCA 37 miRNA
tggagaagcagggcacgtgcaaaa 1
ggagaagcagggcacgtgca 1
ttgcacgcgctcttcttctccaac 1
cacgcgctcttcttctccaac 4
ptc-miR164d
gccaaccaagggaatggaattctgatgggtgggtggctcacgcTGGAGAAGCAGGGCACGTGCAaaatccttctcggcttccagatgctgatgaagcactctttgcacgtgctcccctcctccaacatgagttcctcacccctgtctctcttcagtctccattgctgaaagc 41
((.......((.((((((...((((.(((((((..(((((.(.<<<<<-<<--<<<<<<<<<<<((...(((((((((........))))).)))).....)))))))))))))..)).))))).).)))))..)))))))..........))))..)))))).))....))
tggagaagcagggcac 2
TGGAGAAGCAGGGCACGTGCA 37 miRNA
tggagaagcagggcacgtgcaaaa 1
ggagaagcagggcacgtgca 1
ptc-miR164e
aggtgtgtgtgagcaagaTGGAGAAGCAGGGCACGTGCAttactaactcatgcacacagagtgagagagacatttcttgctggagttatgactcttacctactatagattgtgttggcttcagcgagttagttcttcatgtgcctgtcttccccatcatgatcactaccacacct 53
(((((((.((((.((.((<<<-<<<<--<<<<<<<<<--..((((((((.............((((((....))))))((((((((((..(((((..........)))..))..))))))))))))))))))....}}}}}}}}}==}}}}=}}}}}.)).))))...)))))))
tggagaagcagggcac 2
TGGAGAAGCAGGGCACGTGCA 37 miRNA
tggagaagcagggcacgtgcat 1
ggagaagcagggcacgtgca 1
agcagggcacgtgcattactaa 1
agcagggcacgtgcattactaact 3
ttagttcttcatgtgcctgtct 1
catgtgcctgtcttccccatc 7
ptc-miR166a
gaaatggaagctatttcttttgaggggaatgttgtctggctcgaggtcactaatgggatctatgattttatctcaattgattgattttcttttaaattctagtaaattgaattgagagatatcatgatcaacttatatttaatgatgTCGGACCAGGCTTCATTCCCCccaattgtttcttcctttc 2437
((((.(((((......(..(((.(({{{{{{=={{{{{{=={{{={(((..((((.((((.(((((....(((((((...(..((((.((..........)).))))..))))))))...)))))))))......))))...)))).>>>-->>>>>>-->>>>>>>>.)))..)...)))))))))
ggaatgttgtctggctcgagg 1
ggaatgttgtctggctcgag 1
ggaatgttgtctggctcgaggt 4
ggaatgttgtctggct 5
gaatgttgtctggctcgaggt 1
atgttgtctggctcgaggtcac 1
atgtcggaccaggcttcattcccc 2
tcggaccaggcttcattccccc 147
tcggaccaggcttcattccc 25
tcggaccaggcttcattcccccca 1
TCGGACCAGGCTTCATTCCCC 2196 miRNA
tcggaccaggcttcattcc 2
tcggaccaggcttcattc 2
tcggaccaggcttcat 36
cggaccaggcttcattcccc 8
ggaccaggcttcattcccc 1
gaccaggcttcattcccc 2
accaggcttcattcccc 2
ptc-miR166b
tctttctcctctttcgcatgtattaactgttgaggggattgctgtctggttcgatgtcattcatgtgaagctttaacattaatgtagtattgagtgattTCGGACCAGGCTTCATTCCCCccaactatatttgtttagcattcggagggtgtaataaga 2437
((((...(.(((((((.((((...(((.((((.(({{{={{=={{{{{{{{{{{={(((((((.(((..((.(((....))).))..))))))))))).>>>>>>>>>>>-->>->>>>>.)))).......)))..)))).))))))).)....))))
ggattgctgtctggttcgatg 3
ggattgctgtctggttcgatgt 1
ttcggaccaggcttcattcccc 9
ttcggaccaggcttcattccc 2
tcggaccaggcttcattccccc 147
tcggaccaggcttcattccc 25
tcggaccaggcttcattcccccca 1
TCGGACCAGGCTTCATTCCCC 2196 miRNA
tcggaccaggcttcattcc 2
tcggaccaggcttcattc 2
tcggaccaggcttcat 36
cggaccaggcttcattcccc 8
ggaccaggcttcattcccc 1
gaccaggcttcattcccc 2
accaggcttcattcccc 2
ptc-miR166c
gggagcatctttttttgaggggaatgttgtctggctcgaggactctttcttgatcagtctgatcaagtgttctatctttagatctaatatcttagatcatgtgttagggtcgTCGGACCAGGCTTCATTCCCCccaattattgcttcc 2431
(((((((....(..(((.(({{{{{{=={{{{{{=={{{={(((((..(((((((.....))))))).............(((((((....))))))).......)))))).>>>-->>>>>>-->>>>>>>>.)))..).)))))))
ggaatgttgtctggctcgagg 1
ggaatgttgtctggctcgag 1
ggaatgttgtctggctcgaggac 1
ggaatgttgtctggct 5
gtcgtcggaccaggcttcattccc 1
tcggaccaggcttcattccccc 147
tcggaccaggcttcattccc 25
tcggaccaggcttcattcccccca 1
TCGGACCAGGCTTCATTCCCC 2196 miRNA
tcggaccaggcttcattcc 2
tcggaccaggcttcattc 2
tcggaccaggcttcat 36
cggaccaggcttcattcccc 8
ggaccaggcttcattcccc 1
gaccaggcttcattcccc 2
accaggcttcattcccc 2
ptc-miR166d
gatatgcatgtgcgtgagttgaggggaatgttggctggctcgaagcttaagcaaagagttttctctcaagaaacaactgttaaggctTCGGACCAGGCTTCATTCCCCtcaaccaataaacttatgtatgcatttt 2313
((.((((((..(((((((((((({{{{{{{=={={{{{=={{{{((((.((((....(((((.......)))))...)))).)))))>>>-->>>>->-->>>>>>>>)))........)))))))))))))).))
gggaatgttggctggctcgaa 3
ggaatgttggctggctcgaag 10
ttcggaccaggcttcattcccc 9
ttcggaccaggcttcattccc 2
tcggaccaggcttcattccc 25
tcggaccaggcttcattcccctc 1
TCGGACCAGGCTTCATTCCCC 2196 miRNA
tcggaccaggcttcattcc 2
tcggaccaggcttcattc 2
tcggaccaggcttcat 36
tcggaccaggcttcattcccct 13
cggaccaggcttcattcccc 8
cggaccaggcttcattcccct 1
ggaccaggcttcattcccc 1
gaccaggcttcattcccc 2
accaggcttcattcccc 2
ptc-miR166e
cctcaccccatctctccctctcgcgtattaactgttgaggggattgtcgtctggttcgatgtcattcatgagaagctcaaacataaacgtaatattgaatgattTCGGACCAGGCTTCATTCCCCccaacaatgtttgattagcgttcacagaatggattgagg 2455
(((((..((((.(((......(((.....((((((((.(({{{={{=={{{{{{{{{{{={(((((((.(((...)))..((......)).....)))))))).>>>>>>>>>>>-->>->>>>>.)))))..)))......))).....)))))))..)))))
gttgaggggattgtcgtctgg 1
ggattgtcgtctggttcgatgt 9
ggattgtcgtctggttcgatg 6
ggattgtcgtctggttcgatgtc 1
gattgtcgtctggttcgatgt 3
ttcggaccaggcttcattcccc 9
ttcggaccaggcttcattccc 2
tcggaccaggcttcattccccc 147
tcggaccaggcttcattccc 25
tcggaccaggcttcattcccccca 1
TCGGACCAGGCTTCATTCCCC 2196 miRNA
tcggaccaggcttcattcc 2
tcggaccaggcttcattc 2
tcggaccaggcttcat 36
cggaccaggcttcattcccc 8
ggaccaggcttcattcccc 1
gaccaggcttcattcccc 2
accaggcttcattcccc 2
aggcttcattccccccaacaa 2
ptc-miR166f
aaggtgtgtgggtgtgttgaggggaatgttggctggctcgaagcttaagcaaagagtttcctaacatgaaacaactgttaaggctTCGGACCAGGCTTCATTCCCCtcaaacatacaagcttatttt 2314
((((((.((..(((((((((({{{{{{{=={={{{{=={{{{((((.((((....(((((.......)))))...)))).)))))>>>-->>>>->-->>>>>>>>)).)))))))..)).))))))
gggaatgttggctggctcgaa 3
ggaatgttggctggctcgaag 10
ttcggaccaggcttcattcccc 9
ttcggaccaggcttcattccc 2
tcggaccaggcttcattccc 25
tcggaccaggcttcattcccctc 1
TCGGACCAGGCTTCATTCCCC 2196 miRNA
tcggaccaggcttcattcc 2
tcggaccaggcttcattc 2
tcggaccaggcttcat 36
tcggaccaggcttcattcccct 13
cggaccaggcttcattcccc 8
cggaccaggcttcattcccct 1
ggaccaggcttcattcccc 1
gaccaggcttcattcccc 2
accaggcttcattcccc 2
aggcttcattcccctcaaacata 1
ptc-miR166h
tgattgctacacagttgaggggaatgctgtctgattcgagaccattcactttaagcacacattcatctttcgaatgatcTCGGACCAGGCTTCATTCCCCccaactcaaaatca 2514
(((((.......(((((.((((((((..(((((.(((((((.(((((........................))))).))>>>>>->>>>>-->>>>>>>>.)))))...)))))
ggaatgctgtctgattcgagacc 2
atctcggaccaggcttcattcccc 1
tctcggaccaggcttcattcccc 1
tctcggaccaggcttcattcc 83
tctcggaccaggcttcattc 1
tctcggaccaggcttc 2
ctcggaccaggcttcattcc 2
tcggaccaggcttcattccccc 147
tcggaccaggcttcattccc 25
tcggaccaggcttcattcccccca 1
TCGGACCAGGCTTCATTCCCC 2196 miRNA
tcggaccaggcttcattcc 2
tcggaccaggcttcattc 2
tcggaccaggcttcat 36
cggaccaggcttcattcccc 8
ggaccaggcttcattcccc 1
gaccaggcttcattcccc 2
accaggcttcattcccc 2
ptc-miR166i
ggaagcttgtcttttgaggggaatgttgtttggttcaaggcctggccaccccatgtcttggaatttaaaatatcatgtccTCGGACCAGGCTTCATTCCCCtcaattactgcttcc 2291
((((((..((...((((((((((((..(((((((((.((((.(((.....))).)))).(((...............)))-->>>>>>>>>-->>>>>>>>))))..)).))))))
ctcggaccaggcttcattcc 2
tcggaccaggcttcattccc 25
tcggaccaggcttcattcccctc 1
TCGGACCAGGCTTCATTCCCC 2196 miRNA
tcggaccaggcttcattcc 2
tcggaccaggcttcattc 2
tcggaccaggcttcat 36
tcggaccaggcttcattcccct 13
cggaccaggcttcattcccc 8
cggaccaggcttcattcccct 1
ggaccaggcttcattcccc 1
gaccaggcttcattcccc 2
accaggcttcattcccc 2
ptc-miR166j
ggtagcttcttttttgaggggaatgttgtctggctcgaggactttttgttcatcaatctaatcgaactttctacctgtagatctagtatcttatttaagattgatcacgtattagggttgTCGGACCAGGCTTCATTCCCCccaatcattgcttcc 2430
((.(((.......(((.(({{{{{{=={{{{{{=={{{={(((((.(((..((((((((((..(((((.((((....))))...))).))....)).)))))))).)))....)))))).>>>-->>>>>>-->>>>>>>>.))).....))).))
ggaatgttgtctggctcgagg 1
ggaatgttgtctggctcgag 1
ggaatgttgtctggctcgaggac 1
ggaatgttgtctggct 5
tcggaccaggcttcattccccc 147
tcggaccaggcttcattccc 25
tcggaccaggcttcattcccccca 1
TCGGACCAGGCTTCATTCCCC 2196 miRNA
tcggaccaggcttcattcc 2
tcggaccaggcttcattc 2
tcggaccaggcttcat 36
cggaccaggcttcattcccc 8
ggaccaggcttcattcccc 1
gaccaggcttcattcccc 2
accaggcttcattcccc 2
ptc-miR166k
ggtagcttcttttttgaggggaatgttgtctggctcgaggactttttgttcatcaatctaatcgaactttctacctgtagatctagtatcttatttaagattgatcacgtattagggttgTCGGACCAGGCTTCATTCCCCccaatcattgcttcc 2430
((.(((.......(((.(({{{{{{=={{{{{{=={{{={(((((.(((..((((((((((..(((((.((((....))))...))).))....)).)))))))).)))....)))))).>>>-->>>>>>-->>>>>>>>.))).....))).))
ggaatgttgtctggctcgagg 1
ggaatgttgtctggctcgag 1
ggaatgttgtctggctcgaggac 1
ggaatgttgtctggct 5
tcggaccaggcttcattccccc 147
tcggaccaggcttcattccc 25
tcggaccaggcttcattcccccca 1
TCGGACCAGGCTTCATTCCCC 2196 miRNA
tcggaccaggcttcattcc 2
tcggaccaggcttcattc 2
tcggaccaggcttcat 36
cggaccaggcttcattcccc 8
ggaccaggcttcattcccc 1
gaccaggcttcattcccc 2
accaggcttcattcccc 2
ptc-miR166l
gctagctaggaagcttaacttttgtggtgaatgttgtctggttcaaggcatggccaccacatctcttggtgaatatatgtccTCGGACCAGGCTTCATTCCCCtcaattaatgcttccatacatgc 2291
((......((((((((((...(((.((.(((((..(((((((((.(((((((..(((((.......)))))....)))).))>->>>>>>>>>-->>>>>->>.))))))).))))))......))
ctcggaccaggcttcattcc 2
tcggaccaggcttcattccc 25
tcggaccaggcttcattcccctc 1
TCGGACCAGGCTTCATTCCCC 2196 miRNA
tcggaccaggcttcattcc 2
tcggaccaggcttcattc 2
tcggaccaggcttcat 36
tcggaccaggcttcattcccct 13
cggaccaggcttcattcccc 8
cggaccaggcttcattcccct 1
ggaccaggcttcattcccc 1
gaccaggcttcattcccc 2
accaggcttcattcccc 2
ptc-miR166m
aagggcgtgttgttttaggaaagtgaggatgtgggggaatgtcgtctgactcgagacaacaggtaaactgaaggaatggccggagtttaagagttctcTCGGACCAGGCTTCATTCCCCtcatccacaccttctcctcctcgacctt 2381
((((.((.(..(.....((((.(((.(((((.(({{{{{{{=={{{{{=={{{{{(.(((...((((((...((.....))..))))))...))).))>>>>-->>>>>-->>>>>>>>)))))).))).)))).)..).)).))))
gggaatgtcgtctgactcgag 1
gggaatgtcgtctgactcgaga 2
tctcggaccaggcttcattcccc 1
tctcggaccaggcttcattcc 83
tctcggaccaggcttcattc 1
tctcggaccaggcttc 2
ctcggaccaggcttcattcc 2
tcggaccaggcttcattccc 25
tcggaccaggcttcattcccctc 1
TCGGACCAGGCTTCATTCCCC 2196 miRNA
tcggaccaggcttcattcc 2
tcggaccaggcttcattc 2
tcggaccaggcttcat 36
tcggaccaggcttcattcccct 13
cggaccaggcttcattcccc 8
cggaccaggcttcattcccct 1
ggaccaggcttcattcccc 1
gaccaggcttcattcccc 2
accaggcttcattcccc 2
ptc-miR167a
tcgtgcaccactagcagtTGAAGCTGCCAGCATGATCTAacttccttgcttctttatcaaggatggatttagatcatgtggtggtttcacctgttgatggcaccacgg 352
(((((..(((.((((((.<<<<<<--<<<-<<<<<<<<<(((((((((.........)))))).))..)))))))))))))..)))))).)))))).)))...)))))
tgaagctgccagcatga 3
tgaagctgccagcatgatctaa 47
tgaagctgccagcatg 14
tgaagctgccagcatgatc 2
tgaagctgccagcatgatct 2
TGAAGCTGCCAGCATGATCTA 277 miRNA
gaagctgccagcatgatcta 3
gaagctgccagcatgatctaa 1
gaagctgccagcatgatct 1
aagctgccagcatgatcta 1
agctgccagcatgatcta 1
ptc-miR167b
gttcactagggaaaaagTGAAGCTGCCAGCATGATCTAtctttggttagagaaagaaaggactaaccctagctaggtcatgctgtgacagcctcactccttcctatttggggac 329
((((.((((((((..((<<<-<<<<<<<<<<<<<<<<<.((..((((((............))))))..)).)))))))))))).).)))).)))))..)))))...)))))))
aaagtgaagctgccagcatga 1
aaagtgaagctgccag 1
tgaagctgccagcatga 3
tgaagctgccagcatg 14
tgaagctgccagcatgatc 2
tgaagctgccagcatgatctat 4
tgaagctgccagcatgatct 2
TGAAGCTGCCAGCATGATCTA 277 miRNA
gaagctgccagcatgatcta 3
gaagctgccagcatgatct 1
aagctgccagcatgatcta 1
agctgccagcatgatcta 1
gccagcatgatctatctttggtta 3
ctaggtcatgctgtgacagcctcact 3
ctaggtcatgctgtga 1
ctaggtcatgctgtgaca 3
taggtcatgctgtgacagcctcact 1
ggtcatgctgtgacagcctcact 3
ggtcatgctgtgacag 1
catgctgtgacagcctcactcc 1
catgctgtgacagcctcactcct 2
atgctgtgacagcctcactcc 1
ptc-miR167c
gttgatcatctctcgtgcaccactagcagtTGAAGCTGCCAGCATGATCTAaattaacctccttctttatcaaggatggattagatcatgtggtagtttcacctgctgatggcatcacgaaaaaaccctagc 390
((((........(((((..(((.((((((.<<<<<<<<<<<-<<<<<<<<<(.....(((((((.......))))).)).))}}}}}}}}}}}}}}}}}}}=}))))).)))...)))))........))))
tgaagctgccagcatga 3
tgaagctgccagcatgatctaa 47
tgaagctgccagcatg 14
tgaagctgccagcatgatctaaa 1
tgaagctgccagcatgatc 2
tgaagctgccagcatgatct 2
TGAAGCTGCCAGCATGATCTA 277 miRNA
gaagctgccagcatgatcta 3
gaagctgccagcatgatctaa 1
gaagctgccagcatgatct 1
aagctgccagcatgatcta 1
agctgccagcatgatcta 1
attagatcatgtggtagtttcacc 1
agatcatgtggtagtttc 3
agatcatgtggtagtttcacc 26
gatcatgtggtagtttc 2
gatcatgtggtagtttcacc 4
tcatgtggtagtttcacctgc 1
ptc-miR167d
gtggttaaaagaagttcacaagggaaaaggTGAAGCTGCCAGCATGATCTAtctttggttagagaaggatagaagcgaaagaactaaccctagctaggtcatgctctgacagcctcactccttcctatttggggacccat 424
((((.........((((.((((((((..((<<<-<<<<<-<<<<<<<<<<<.((..((((((.............(....)..))))))..)).))}}}}}}}}}==}=}}}}=}}}))..)))))..))).))))))))
tgaagctgccagcatga 3
tgaagctgccagcatg 14
tgaagctgccagcatgatc 2
tgaagctgccagcatgatctat 4
tgaagctgccagcatgatct 2
TGAAGCTGCCAGCATGATCTA 277 miRNA
gaagctgccagcatgatcta 3
gaagctgccagcatgatct 1
aagctgccagcatgatcta 1
agctgccagcatgatcta 1
gccagcatgatctatctttggtta 3
ctaggtcatgctctgacagcctcact 1
ggtcatgctctgacag 2
ggtcatgctctgacagcctca 1
ggtcatgctctgacagcctcact 109
ptc-miR167e
gagcggatagacctaatcatgcaccactagtagtTGAAGCTGCCAGCATGATCTGaactttccttaattttcctatacgggaaagactagatcatgtggtagtttcatctattgatggtagcatgggaaaccctaatcagctt 116
((((.(((((......((((((((((.((((((.<<<<<<<<<<<-<<<<<<<<<..(((((((..............))))))).=}}}}}}}}}}}}}}}}}}}}.)))))).)))).))))))......)).))).))))
tgaagctgccagcatga 3
tgaagctgccagcatgatctgaactt 2
tgaagctgccagcatg 14
tgaagctgccagcatgatc 2
tgaagctgccagcatgatctgaact 2
tgaagctgccagcatgatctgaa 1
tgaagctgccagcatgatctga 19
tgaagctgccagcatgatctgaac 1
tgaagctgccagcatgatct 2
TGAAGCTGCCAGCATGATCTG 51 miRNA
gaagctgccagcatgatctga 1
gaagctgccagcatgatct 1
aagctgccagcatgatctgaac 3
actagatcatgtggta 1
ctagatcatgtggtagtttca 1
agatcatgtggtagtttcatc 1
agatcatgtggtagtttc 3
gatcatgtggtagtttc 2
gatcatgtggtagtttcatc 6
ptc-miR167f
tcgtgcacctctatcagtTGAAGCTGCCAGCATGATCTTAgccttcctcctttgttgaggaaagaaacagatcatgtggcagtttcacctgttgttggtatcacga 506
(((((.(((..((.(((.<<<<<<<<<<<-<<<<<<<<--.(.((((((.......)))))).)....}}}}}}}}}}}}}}}}}}}=}}).))..)))..)))))
ttgaagctgccagcatgatctta 1
tgaagctgccagcatga 3
tgaagctgccagcatgatctt 34
tgaagctgccagcatg 14
tgaagctgccagcatgatc 2
TGAAGCTGCCAGCATGATCTTA 260 miRNA
tgaagctgccagcatgatct 2
gaagctgccagcatgatct 1
gaagctgccagcatgatctta 2
aacagatcatgtggcagtttcacc 2
agatcatgtggcagtttcacct 3
agatcatgtggcagtt 3
agatcatgtggcagtttcacc 173
gatcatgtggcagtttcacc 6
ptc-miR167g
tcgtgcaccactatcagtTGAAGCTGCCAGCATGATCTTAacctccctcctttgtcgaggaaagaacagatcatgtggcagtttcacctgaagttggtatcacga 507
(((((.((((((.((((.<<<<<<<<<<<-<<<<<<<<--.....((((.......)))).......}}}}}}}}}}}}}}}}}}}=}})))).))))..)))))
ttgaagctgccagcatgatctta 1
tgaagctgccagcatga 3
tgaagctgccagcatgatctt 34
tgaagctgccagcatg 14
tgaagctgccagcatgatcttaa 1
tgaagctgccagcatgatc 2
TGAAGCTGCCAGCATGATCTTA 260 miRNA
tgaagctgccagcatgatct 2
gaagctgccagcatgatct 1
gaagctgccagcatgatctta 2
aacagatcatgtggcagtttcacc 2
agatcatgtggcagtttcacct 3
agatcatgtggcagtt 3
agatcatgtggcagtttcacc 173
gatcatgtggcagtttcacc 6
ptc-miR169a
gcacaaagtggtatgCAGCCAAGGATGACTTGCCGActtaactgatctgtataaattaatgcatgtgtagtcaaaattactactactatatattaatctgatctgtgaccacaaattaactaactactagctagtaattagttggcaagttgtccatggctacatgctgctttttgc 672
(((.((((..(((((-<<<<<-<<<--<<<<<<<<<((..((((....(((...(((((((.(((((((((.......))))).)).)).))))))).((((.(((....))).))))......)))....))))....)))))))))))..))).))))).)))))..)))).)))
tgcagccaaggatgacttgcc 1
gcagccaaggatgacttgccga 1
cagccaaggatgacttgccgac 36
cagccaaggatgactt 20
cagccaaggatgacttgccgact 11
cagccaaggatgacttgccg 7
cagccaaggatgacttgcc 2
CAGCCAAGGATGACTTGCCGA 569 miRNA
cagccaaggatgacttgc 1
agccaaggatgacttgccga 12
agccaaggatgacttgccgac 6
agccaaggatgacttgccgact 3
agccaaggatgacttg 1
agccaaggatgacttgc 1
gccaaggatgacttgc 1
ptc-miR169aa
tcttgagtgtcttccatgaaaacataaagagtagagaTCGAGCCAAGAATGACTTGTCGgcaggctagcaattgctacgtatagagcaatatgtatgctagaatgagtattccgccaggtcgttcttggctcaactttgctcttcgttttctcatgcgagcctctcaaga 89
(((((((.(.(((.(((((.((.(..((((((((((.--<<<<<<<<<<<<<<<<<-<<(((..((((((((((((.(.....))))))).....))))))..))......))).)))))))))))))))))..))))))))))..).)).))))).))).).)))))))
gagtagagatcgagccaagaat 1
gatcgagccaagaatgacttgt 1
tcgagccaagaatgacttgt 2
tcgagccaagaatgacttgtcgg 1
TCGAGCCAAGAATGACTTGTCG 44 miRNA
tcgagccaagaatgacttgtc 1
cgagccaagaatgacttgtcgg 2
cgagccaagaatgacttgtcg 6
agccaagaatgacttgtcggca 3
gccaagaatgacttgtcggca 7
ccaggtcgttcttggctcaact 1
ccaggtcgttcttggctcaac 15
aggtcgttcttggctcaact 1
aggtcgttcttggctcaactt 4
ptc-miR169c
gccttgcatggaggctcataaagtttgatgCAGCCAAGGATGACTTGCCGAcgactcaatttttgcttccatatggtagaagagatgaataggttggcaggttttccttggctacattttcctttctgctcctcctgctaggt 758
((((.(((.(((((..((.((((...((((-<<<<<<<<<-<<<<<<<<<<(.(.(((.(((((.((.((....)).))))))).))).)..)))}}}}}}}}=}}}}}}}}}=}}))...)))).))..)))))))).))))
tgcagccaaggatgacttgcc 1
tgcagccaaggatgacttgccgacg 1
gcagccaaggatgacttgccgacg 5
gcagccaaggatgacttgccga 1
cagccaaggatgacttgccgac 36
cagccaaggatgacttgccgacg 42
cagccaaggatgactt 20
cagccaaggatgacttgccg 7
cagccaaggatgacttgcc 2
CAGCCAAGGATGACTTGCCGA 569 miRNA
cagccaaggatgacttgccgacga 7
cagccaaggatgacttgc 1
agccaaggatgacttgccgacgac 1
agccaaggatgacttgccga 12
agccaaggatgacttgccgac 6
agccaaggatgacttgccgacg 28
agccaaggatgacttg 1
agccaaggatgacttgc 1
gccaaggatgacttgccgacgac 1
gccaaggatgacttgccgacg 1
gccaaggatgacttgccgacgact 6
gccaaggatgacttgc 1
ccaaggatgacttgccgacgact 2
caaggatgacttgccgacga 1
ggcaggttttccttggctaca 1
gcaggttttccttggctacattt 1
gcaggttttccttggctacatt 1
gcaggttttccttggctaca 2
ptc-miR169d
ggtctaggagttttgcatgaagaggtagagagtcgaatgCAGCCAAGGATGACTTGCCGGcatttcctcctaagtagcgagcccggcaaggcttctatttggcacgcccggccggcgggttgtccttggctatatttggttcccttcttctcatgtgaaactccaggcc 255
(((((.(((((((..(((((.((((.((.((..((((((-<<<<<<<<<--<<<<<<<<<(........((((((((.(((((......)))))))))))))........)))}}}}}}}==}}}}}}}}}=})))))..)).)).)))))))))..))))))))))))
tgcagccaaggatgacttgcc 1
cagccaaggatgactt 20
cagccaaggatgacttgccg 7
cagccaaggatgacttgccggc 5
CAGCCAAGGATGACTTGCCGG 212 miRNA
cagccaaggatgacttgcc 2
cagccaaggatgacttgc 1
agccaaggatgacttgccgg 3
agccaaggatgacttg 1
agccaaggatgacttgc 1
gccaaggatgacttgc 1
ggcgggttgtccttggctat 1
ptc-miR169g
ggtgtaggggttttgcatgaagaggtagagagtagaatgCAGCCAAGGATGACTTGCCGGcatttcctcctaggtagctagcaagccttctatttggcatgcctgtccggcaggttgtccttggctaaattttgttctcttcttctcatgtgagactccaggcc 254
(((.(.(((((((..(((((.((((.((((((((((((.-<<<<<<<<<--<<<<<<<<<((...((.....))......(((.(((........))).))).)).)))))))))..)))))))))..)))))))))))).)))))))))..)))))))).)))
tgcagccaaggatgacttgcc 1
cagccaaggatgactt 20
cagccaaggatgacttgccg 7
cagccaaggatgacttgccggc 5
CAGCCAAGGATGACTTGCCGG 212 miRNA
cagccaaggatgacttgcc 2
cagccaaggatgacttgc 1
agccaaggatgacttgccgg 3
agccaaggatgacttg 1
agccaaggatgacttgc 1
gccaaggatgacttgc 1
ptc-miR169h
ggggcttacatgaagaggtagagagtgtaattCAGCCAAGGATGACTTGCCGGcagcacgggatctcagagcttaataactagaagatcaaggctgtcattacttttccggccggcaagttgcccttggctacattgtactctcttcttctcatgtaaggcct 285
(((.(((((((((.((((.((((((((((((.-<<<<<<<<--<<<<<<<<<<((((.(..(((((...((........))...)))))..))))...............)))}}}}}}}}==}}}}}}}}==}))))))))))).))))))))))))).)))
tgaagaggtagagagtgtaatt 7
tcagccaaggatgacttgccgg 4
cagccaaggatgactt 20
cagccaaggatgacttgccg 7
cagccaaggatgacttgccggc 5
CAGCCAAGGATGACTTGCCGG 212 miRNA
cagccaaggatgacttgcc 2
cagccaaggatgacttgc 1
agccaaggatgacttgccgg 3
agccaaggatgacttg 1
agccaaggatgacttgc 1
gccaaggatgacttgc 1
ggcaagttgcccttggctacat 3
ggcaagttgcccttgg 1
ggcaagttgcccttggctac 4
ggcaagttgcccttggctaca 8
tggctacattgtactctcttc 1
ttgtactctcttcttctcatg 4
ptc-miR169j
tgagaggaagggaggccttacatgaagacaagagtcttgtttgaTAGCCAAGGATGACTTGCCTGctacttgcaagagtttctgcaaagagatcagaaccaaatatgcatggaattatatgtaatgaaactcttgtttgattgccaggcagtctccttggctagcctgacaggctcttctctctcatgctaggccttctcttcttcca 101
((.(((((((((((((((..((((((((.((((((((.(((...<<<<<<<<<<-<<<<-<<<<<(..(..(((((((((((......(....)...........((((((......))))))..)))))))))))..)...).)))))))))))))))))))....))))))))))).))).)))))..)))))))).)))))))))
tagccaaggatgactt 3
TAGCCAAGGATGACTTGCCTG 69 miRNA
tagccaaggatgacttgcctgc 10
agccaaggatgacttgcctg 1
agccaaggatgacttgcctgct 4
agccaaggatgacttg 1
agccaaggatgacttgc 1
gccaaggatgacttgc 1
ggcagtctccttggctagcctg 1
ggcagtctccttggctagc 1
ggcagtctccttggctagcct 2
ggcagtctccttggctagcc 7
ptc-miR169s
ttgccttgggggcttgcatgaagaggtagagagtgtgattCAGCCAAGGATGACTTGCCGGcagcaggtaagagcaaagctccgtttttggaagttcaaggatatcttaacttttccggccggcaagctgtccttggctacattgtactctcttcttctcatgcaagaactacttggtaa 288
(((((...((..(((((((((.((((.((((((((..((.-<<<<<<<<<<--<<<<<<<<(....((.(((((..(((....((((((((....))))))))..)))..))))))).))}}}}}}}==}}}}}}}}}}==))..)))))))).)))))))))))))..))....)))))
atgaagaggtagagagtgtgat 1
tgaagaggtagagagtgtgatt 3
tcagccaaggatgacttgccgg 4
cagccaaggatgactt 20
cagccaaggatgacttgccg 7
cagccaaggatgacttgccggc 5
CAGCCAAGGATGACTTGCCGG 212 miRNA
cagccaaggatgacttgcc 2
cagccaaggatgacttgc 1
agccaaggatgacttgccgg 3
agccaaggatgacttg 1
agccaaggatgacttgc 1
gccaaggatgacttgc 1
ccggcaagctgtccttggctacatt 1
cggcaagctgtccttggctac 1
ggcaagctgtccttggctacat 3
ggcaagctgtccttggctacatt 3
ggcaagctgtccttgg 1
ggcaagctgtccttggctaca 12
caagctgtccttggctac 1
tggctacattgtactctcttc 1
ttgtactctcttcttctcatg 4
ptc-miR169u
ggaagagaggtcttgtatgaagatgaagaggtagagagtttggTAGCCAAGGACGACTAGCCTAtttcctccattgggttctcaaaagaatgaaatgtcgttcagagctcactggtagggttcataggcagtctcctttggctatcctaactggctctcatttttcatgctagacctacatctcttct 74
(((((((((((((.((((((((((((.(((.(((..((...((<<<<<<<<<<-<<<<-<<<<<(.(((((((.((((((((.....((((((....)))))))))))))).))).))))...))}}}}}}}}}}}=}}}}}}}}}))..))).)))))).))))))))).)))))....))))))))
TAGCCAAGGACGACTAGCCTA 53 miRNA
tagccaaggacgactagcctatt 1
tagccaaggacgacta 1
taggcagtctcctttggctatc 2
aggcagtctcctttggctatc 1
aggcagtctcctttggc 2
aggcagtctcctttggctatcc 1
ggcagtctcctttggc 1
ggcagtctcctttggctatcc 11
ggcagtctcctttggctatc 1
ptc-miR169z
ggtctaagagatttgcatgaagatgttgatagtagaatgCAGCCAAGAATGATTTGCCGGcgccggccagcacttgttgcaaagcaactaagcaagggcttcaaatgtttttggcaccccggcaagttgttcttggctacatttggatatcttcttctcatgtgaaactctatagacc 56
((((((((((.((..(((((.((....((((...(((((-<<<<<<<<<--<<<<<<<<<.(((((((....((((((((...))))).)))....))))............)))...))}}}}}}}==}}}}}}}}}=}})))...))))....)))))))..)).)))).))))))
cagccaagaatgatttgc 1
cagccaagaatgatttgccggc 2
cagccaagaatgattt 1
cagccaagaatgatttgccggcg 1
CAGCCAAGAATGATTTGCCGG 50 miRNA
ggcaagttgttcttggctaca 1
ptc-miR171a
gtttcttcagagaaaacgggatattggtacggttcaatcagaaagtaatgctcccaaaagtatagagtactattgttTGATTGAGCCGTGCCAATATCacgtacactcatcttcctctcgaggaac 244
(((((((.((((.(((((={{{{{{{{{{{{{{{{{{{{(((.((((.(((((...........))))).)))).))>>>>>>>>>>>>>>>>>>>>>.))).........)).)))).)))))))
ggatattggtacggttcaat 1
ggatattggtacggttcaatc 3
tgattgagccgtgccaa 9
tgattgagccgtgccaat 2
tgattgagccgtgcca 11
TGATTGAGCCGTGCCAATATC 207 miRNA
gattgagccgtgccaatatc 3
ttgagccgtgccaatatcacgt 2
ttgagccgtgccaatatcac 2
ttgagccgtgccaatatcacg 2
tgagccgtgccaatatc 1
tgagccgtgccaatatcacgt 1
ptc-miR171b
gtcaacataattatatataacgagatattggtgcggttcaatcagatagtaatgctccataagcatagagctctattgttTGATTGAGCCGTGCCAATATCacgtatatgttgc 242
(.(((((((..........(((.((((((((..((((((((((((((((((..((((.((....)).))))..)))))))>>>>>>>>>>>-->>>>>>>>.))).))))))))
tgcggttcaatcagatagtaatgc 1
tctattgtttgattgagccgtgcc 1
tgattgagccgtgccaa 9
tgattgagccgtgccaat 2
tgattgagccgtgcca 11
TGATTGAGCCGTGCCAATATC 207 miRNA
gattgagccgtgccaatatc 3
ttgagccgtgccaatatcacgt 2
ttgagccgtgccaatatcac 2
ttgagccgtgccaatatcacg 2
tgagccgtgccaatatc 1
tgagccgtgccaatatcacgt 1
ptc-miR171c
gctggatgctaaggaggcaaaagaaagcgatgttggtgaggttcaatccgaagacggatttacacgtgaaagtaattgtaaaatacgatctcagaTTGAGCCGCGCCAATATCACTttctcagggttatttgctttcccagc 14
(((((.......(((((((((((((((={{{{{{{{{{={{{{{{{{{.((.((((..((((((.((.......))))))))...)).)))).))>>>>>>>->>>>>>>>>>->>))))........))))))))))))))
cgatgttggtgaggttcaatc 2
TTGAGCCGCGCCAATATCACT 7 miRNA
ttgagccgcgccaatatcactt 5
ptc-miR171d
gaaagcgatgttggtgaggttcaatccgaagacagatttacacgagtgaaagtaaaatccgatctcagaTTGAGCCGCGCCAATATCACTttt 14
(((((={{{{{{{{{{={{{{{{{{{.((.(((.(((((..((........)).))))).).)))).))>>>>>>>->>>>>>>>>>->>)))
cgatgttggtgaggttcaatc 2
TTGAGCCGCGCCAATATCACT 7 miRNA
ttgagccgcgccaatatcactt 5
ptc-miR171e
aatttgatgttggcagagctcaatcaaatcaaagcactcaatggttgggttctttcatcTGATTGAGCCGTGCCAATATCgcatt 238
(((.(((((((((((..(((((((((.((.((((.(((((.....))))).)))).)).>>>>>>>>>-->>>>>>>>>>).)))
tctgattgagccgtgccaatatc 4
ctgattgagccgtgccaatat 1
tgattgagccgtgccaa 9
tgattgagccgtgccaat 2
tgattgagccgtgcca 11
TGATTGAGCCGTGCCAATATC 207 miRNA
gattgagccgtgccaatatc 3
tgagccgtgccaatatc 1
ptc-miR171f
gtgcttgaaagtgtcattgcgatgttggcccggttcactcagagaaaagacaccattttttttcaagaagatcatcaaagcttgaaagaataatggtggtcggtcgtctcTGATTGAGCCGTGCCAATATCttagtgctctttcatttat 246
(((..((((((.(.(((((.(({{{{{{{={{{{{{{={{{{{((...(((((((((((((((((((..(.....)....)))))))))).)))))).))).....))))>>>->>>>>>>->>>>>>>>>.)))))).))))))..)))
tgttggcccggttcactcaga 4
ctctgattgagccgtgccaatatc 2
ctctgattgagccgtgcca 1
tctgattgagccgtgccaatatc 4
ctgattgagccgtgccaatat 1
tgattgagccgtgccaa 9
tgattgagccgtgccaat 2
tgattgagccgtgcca 11
TGATTGAGCCGTGCCAATATC 207 miRNA
gattgagccgtgccaatatc 3
tgagccgtgccaatatc 1
gccgtgccaatatcttagtgctctttca 1
ptc-miR171l
ggagaagtagacacggtgtgatattggtccggctcatcttctgtgcataagcatctgaagttcttcactcatgaagaCGAGCCGAATCAATATCACTCttgtatgcttcttc 814
(((((((((.(((.((={{{{{{{{{{{={{{{{{==((((.((((....))))..)))).((((((....))))))->>>>>>->>>>>>>>>>>->)))).)))))))))
cggtgtgatattggtccggctc 1
tgtgatattggtccggctcatct 16
tgtgatattggtccggctcat 2
tgtgatattggtccggctcatc 20
tgtgatattggtccgg 1
tgtgatattggtccggctcatctt 1
tgtgatattggtccggct 1
tgtgatattggtccggctc 1
tgatattggtccggctcatct 1
gacgagccgaatcaatatcactc 1
cgagccgaatcaatat 12
cgagccgaatcaatatc 1
cgagccgaatcaatatcactct 12
CGAGCCGAATCAATATCACTC 736 miRNA
cgagccgaatcaatatcact 5
cgagccgaatcaatatca 3
ptc-miR171m
ggagaagcagacatggcgtggtattgatccggctcatcttctgtatttgcatcagaagttcttcgctgaagaCGAGCCGAATCAATATCACTCttgtacgcttcattc 815
((((((((..(((.((={{{{{{{{{{{={{{{{{==((((((.........)))))).(((((...)))))->>>>>>->>>>>>>>>>>->))))..))))).)))
cgtggtattgatccggctcat 2
cgtggtattgatccggctcatctt 5
cgtggtattgatccggctcatct 21
cgtggtattgatccggctcatc 16
cgtggtattgatccgg 1
gacgagccgaatcaatatcactc 1
cgagccgaatcaatat 12
cgagccgaatcaatatc 1
cgagccgaatcaatatcactct 12
CGAGCCGAATCAATATCACTC 736 miRNA
cgagccgaatcaatatcact 5
cgagccgaatcaatatca 3
ptc-miR171n
ttggagaagcagacatggcgtggtattgatccggctcttcttctgtatttgcatcagaagtttttcgctgaagaCGAGCCGAATCAATATCACTCttgtacgcttcattctctaa 772
((((((((((..(((.((.(((((((((((.((((((.(((((.((....((.......)).....)).)))))->>>>>>->>>>>>>>>>>->))))..)))....)))))))
cgtggtattgatccggctcttc 1
cgtggtattgatccgg 1
gacgagccgaatcaatatcactc 1
cgagccgaatcaatat 12
cgagccgaatcaatatc 1
cgagccgaatcaatatcactct 12
CGAGCCGAATCAATATCACTC 736 miRNA
cgagccgaatcaatatcact 5
cgagccgaatcaatatca 3
ptc-miR172f
gtcgttgtttgcgggtgctgcatcaccaagattcacatgcaaatgcatggccgatgatatatgttagaaattttttttatataaaaaagatatctttctttctttctgatcatctgccaaagttctttggaagtgAGAATCTTGATGATGCTGCATcggcaataaacgac 339
((((((..((((.(((((.((((((.((((((((.(((.((((.((.((((.((((((....(..(((((((((((((....)))))))))....))))..)......)))))).))))..))..))))...)))->>>>>>>>->>>>>>->>>>).))))..))))))
gtgagaatcttgatgatgctgcat 8
gtgagaatcttgatgatgctgcatc 1
tgagaatcttgatgatgctgc 2
agaatcttgatgatgctgcatc 45
agaatcttgatgatgctgca 1
agaatcttgatgatgct 3
agaatcttgatgatgctg 3
agaatcttgatgatgctgc 12
agaatcttgatgatgc 15
AGAATCTTGATGATGCTGCAT 249 miRNA
ptc-miR172g
agtcactgtttgcctatGGAGCATCATCAAGATTCACAagctttattagggctagtgtgtggtgatgatggtggcttttggtggtccctttttttcaatccaatagccctttgaattgggaatcttgatgatgctgcagcggcaataaatggct 327
(((((....(((((..(<-<<<<<<<<<<<<<<<<-<<(..((((..(((((((.....((((((.((.((.((((......))))))...)).)))..))).))))))).)))))))=}}}}}}}}}}}}}}}}=}}=.)))))....)))))
ggagcatcatcaagattca 1
GGAGCATCATCAAGATTCACA 256 miRNA
ggagcatcatcaagat 6
ggagcatcatcaagattcacaa 1
ggagcatcatcaagattcac 52
gggaatcttgatgatgctgcagc 1
ggaatcttgatgatgctgc 1
ggaatcttgatgatgct 1
ggaatcttgatgatgctgcagc 3
ggaatcttgatgatgctgcag 4
gaatcttgatgatgctgcagc 1
ptc-miR390a
ttgtacacacaagtacgggagaatctgttAAGCTCAGGAGGGATAGCGCCatgagcatgacaaagtctatgtttgagttaatctcaacaaaatcaatccagtcatcagtggcgctatctatcctgagttctatgggttctccttactattctggtgcag 274
((((((.....((((.((((((((((((.-<<<<<<<<<-<<<<<<<<<<((..(.(((((........((((.(((.....)))))))...........)))))).))))}}}}}}}}=}}}}}}}}}==})))))))))))))))......))))))
taagctcaggagggatag 13
taagctcaggagggatagcgcc 13
taagctcaggagggatagcgc 39
aagctcaggagggatag 38
aagctcaggagggatagcgcca 1
aagctcaggagggata 2
aagctcaggagggatagcgc 10
AAGCTCAGGAGGGATAGCGCC 126 miRNA
agctcaggagggatag 1
cgctatctatcctgagttcta 21
cgctatctatcctgagttct 8
gctatctatcctgagttcta 1
ctatctatcctgagttcta 1
ptc-miR390b
agtatggaagaatctgttAAGCTCAGGAGGGATAGCGCCctaaggataatcatgggctctttttatgtggtttttgattctcagtggcgctatccatcctgagtttcattgcttcttcttgct 269
((((.(((((((.(.((.<<<<<<<<<<-<<<<<<<<<<((.((((...(((..(((((.......).))))..))))))).)).))}}}}}}}}=}}}}}}}}}}=}).).)))))))))))
taagctcaggagggatag 13
taagctcaggagggatagcgcc 13
taagctcaggagggatagcgc 39
aagctcaggagggatag 38
aagctcaggagggata 2
aagctcaggagggatagcgc 10
AAGCTCAGGAGGGATAGCGCC 126 miRNA
aagctcaggagggatagcgccc 5
agctcaggagggatag 1
cgctatccatcctgagtttc 2
cgctatccatcctgag 4
cgctatccatcctgagtttca 15
cgctatccatcctgagttt 1
ptc-miR390c
gatatgtgcataagtatgggaggatctgttAAGCTCAGGAGGGATAGCGCCatgagctgatgataagttgatgtttgatgggttaatctcaacataatcaatctagtcattagtggcgctatctatcctgagttctataggttctccttgctattccggtacagtttc 274
((..(((((...((((.((((((((((((.-<<<<<<<<<-<<<<<<<<<<....(((((((((.(((((((...((.((((.....)))).))..))))).)).)))))))))))}}}}}}}}=}}}}}}}}}==})))))))))))))))......)))))...))
taagctcaggagggatag 13
taagctcaggagggatagcgcc 13
taagctcaggagggatagcgc 39
aagctcaggagggatag 38
aagctcaggagggatagcgcca 1
aagctcaggagggata 2
aagctcaggagggatagcgc 10
AAGCTCAGGAGGGATAGCGCC 126 miRNA
agctcaggagggatag 1
cgctatctatcctgagttcta 21
cgctatctatcctgagttct 8
gctatctatcctgagttcta 1
ctatctatcctgagttcta 1
ptc-miR394a
tcatgtgggttttgcaaagggtttcttacagagttttTTGGCATTCTGTCCACCTCCatctgtagaaactacaagttgttctactttctggaggtgggcatactgccaactgagctctgttggtctctctttgtaaaaccctcgtga 62
(((((.(((((((((((((((...((.(((((((((.<<<<<<-<-<<<<<<<<<<<(...((((((.(........)))))))....)))))))))))).).))))))..))))))))).))...))))))))))))))).)))))
tgcaaagggtttcttacagag 1
aagggtttcttacagagttt 1
aagggtttcttacagagtttt 5
ttggcattctgtccac 2
TTGGCATTCTGTCCACCTCC 44 miRNA
ttggcattctgtccacctccatc 1
tggcattctgtccacctcc 1
gcattctgtccacctccatctgt 1
tgggcatactgccaactgagct 1
agctctgttggtctctctttg 4
ctgttggtctctctttgtaaaacc 1
ptc-miR394b
tcatgtggatttagcaaagggtttcttacagagtttaTTGGCATTCTGTCCACCTCCtatctttagaaattagaatatctctttcatatggaggtgggcatactgccaaccgagctctgttggtctctctttgtaaaaccctcgtga 80
(((((.((.(((.((((((((...((.(((((((((.<<<<<<-<-<<<<<<<<<<<.......(((.((......)).))).......))))))))))).).))))))..))))))))).))...)))))))).))).)).)))))
aagggtttcttacagagttta 12
aagggtttcttacagagttt 1
agagtttattggcattctgtccacc 6
agagtttattggcattctgtcca 2
gagtttattggcattctgtccacc 1
gagtttattggcattctgtccacct 1
gtttattggcattctgtccac 1
tattggcattctgtccacctcc 1
attggcattctgtccacctcc 3
ttggcattctgtccac 2
TTGGCATTCTGTCCACCTCC 44 miRNA
tggcattctgtccacctcc 1
agctctgttggtctctctttg 4
ctgttggtctctctttgtaaaacc 1
ptc-miR395b
tgcaatggtgcatagatcaagtgtcccctagagttcccttgagcacttcactgggacccttcagaccgaaagagtattatctttcccaCTGAAGTGTTTGGGGGAACTCctggtgtcatttgatgttaataattagttaattgca 107
((((((...((..(.((((((((.(.((..(({{{{{{{=={{{{{{{{{={{(((........(((....).))........)))))->>>>>>>>>-->>>>>>>>>..)).).)))))))).).........))..))))))
gttcccttgagcacttcactgg 1
gttcccttgagcacttcact 8
gttcccttgagcactt 3
gttcccttgagcacttcactg 31
actgaagtgtttgggggaact 1
CTGAAGTGTTTGGGGGAACTC 42 miRNA
ctgaagtgtttgggggaactcc 20
tgaagtgtttgggggaactc 1
ptc-miR395c
tagcatagatcaagtgtcccctagagttcctctgagcacttcattgggaatcttcgattaaatgaaagagtattatcattcctaCTGAAGTGTTTGGGGGAACTCctggtgtcatttgatgtta 77
(((((....(((((((.(.((..(({{{{{{{=={{{{{{{{{={{((((..((((......)))).((......)).))))))->>>>>>>>>-->>>>>>>>>..)).).))))))))))))
tcccctagagttcctctgagc 1
gttcctctgagcacttcattg 9
gttcctctgagcacttcatt 2
gttcctctgagcactt 1
actgaagtgtttgggggaact 1
CTGAAGTGTTTGGGGGAACTC 42 miRNA
ctgaagtgtttgggggaactcc 20
tgaagtgtttgggggaactc 1
ptc-miR395d
agcatgccatagatcaagtgtcccctagagttcctctgagcacttcactgggaatttccgatcaaatgaaagagtattatcattcctaCTGAAGTGTTTGGGGGAACTCctggtgtcatttgatgtttacaagct 72
(((.((....(.((((((((.(.((..(({{{{{{{=={{{{{{{{{={{(((((......((........))........)))))))->>>>>>>>>-->>>>>>>>>..)).).)))))))).)...)).)))
tcccctagagttcctctgagc 1
gttcctctgagcacttcact 1
gttcctctgagcactt 1
gttcctctgagcacttcactg 5
actgaagtgtttgggggaact 1
CTGAAGTGTTTGGGGGAACTC 42 miRNA
ctgaagtgtttgggggaactcc 20
tgaagtgtttgggggaactc 1
ptc-miR395e
gaaacgcaaagaacgttagctgtcccccggagtttccctgaccacttcactggggctataattctactcttcgtgtttaagggtagaggcaacccttcctcaCTGAAGTGTTTGGGGGAACTCtgggtggcatttaacactgtttagctgtc 56
((...(((((.(..(((((.((((.(({{{{{{{{{{{=={={{{{{{(.(((((......((((((((((.......)))))))))).........)))))->>>>>>>->-->>>>>>>>>)))).)))).)))))..).))).))..))
cggagtttccctgaccacttc 1
gtttccctgaccacttcactg 3
gtttccctgaccacttcact 8
actgaagtgtttgggggaact 1
CTGAAGTGTTTGGGGGAACTC 42 miRNA
tgaagtgtttgggggaactc 1
ptc-miR395g
atcaagtgtcccctagagttcctctgagcacttcattggggatcttccatcgacctgaaagagtattatcattcctaCTGAAGTGTTTGGGGGAACTCctggtgtcatttgat 77
((((((((.(.((..(({{{{{{{=={{{{{{{{{={{((((((((.((......)).)))).........))))))->>>>>>>>>-->>>>>>>>>..)).).))))))))
tcccctagagttcctctgagc 1
gttcctctgagcacttcattg 9
gttcctctgagcacttcatt 2
gttcctctgagcactt 1
actgaagtgtttgggggaact 1
CTGAAGTGTTTGGGGGAACTC 42 miRNA
ctgaagtgtttgggggaactcc 20
tgaagtgtttgggggaactc 1
ptc-miR395h
atcaagtgtcccctagagttcctctgagcacttcattggggatcttccatcgacctgaaagagtattatcattcctaCTGAAGTGTTTGGGGGAACTCctggtgtcatttgat 77
((((((((.(.((..(({{{{{{{=={{{{{{{{{={{((((((((.((......)).)))).........))))))->>>>>>>>>-->>>>>>>>>..)).).))))))))
tcccctagagttcctctgagc 1
gttcctctgagcacttcattg 9
gttcctctgagcacttcatt 2
gttcctctgagcactt 1
actgaagtgtttgggggaact 1
CTGAAGTGTTTGGGGGAACTC 42 miRNA
ctgaagtgtttgggggaactcc 20
tgaagtgtttgggggaactc 1
ptc-miR395i
ttattttttgttttcgttaattgttgatagcacagatcaagtgtcccctagagttcctctgagcacttcaatggggatcttccatcgacctgaaagagtattatcattcctaCTGAAGTGTTTGGGGGAACTCctggtgtcatttgatgttacaagctcagaaaacacagtaa 67
(((((...(((((((.......(((..(((((....(((((((.(.((..(({{{{{{{=={{{{{{{{{={{((((((((.((......)).)))).........))))))->>>>>>>>>-->>>>>>>>>..)).).))))))))))))..)))...))))))).)))))
tcccctagagttcctctgagc 1
gttcctctgagcacttcaatg 1
gttcctctgagcactt 1
actgaagtgtttgggggaact 1
CTGAAGTGTTTGGGGGAACTC 42 miRNA
ctgaagtgtttgggggaactcc 20
tgaagtgtttgggggaactc 1
ptc-miR396a
tcttggtattcTTCCACAGCTTTCTTGAACTGcacctatttgaatattgttgttgatgttgccgtgcatgtacatatgacattgtatttttgttgcggttcaataaagctgtgggaagatacaaacagga 2777
(((((((((..<<<<<<<<<<<<-<<<<<<<<((...((..((((((...((((((((((((...)))...)))).)))))..))))))..))))))}}}}}}=}}}}}}}}}}}}==))))...)))))
TTCCACAGCTTTCTTGAACTG 2570 miRNA
ttccacagctttcttgaact 25
ttccacagctttcttgaac 4
ttccacagctttcttgaactgcac 1
ttccacagctttcttg 77
ttccacagctttcttgaactgca 11
ttccacagctttcttgaactgc 51
tccacagctttcttgaact 1
tccacagctttcttgaactg 9
tccacagctttcttgaactgc 1
tccacagctttcttga 1
ccacagctttcttgaactgca 24
ggttcaataaagctgtgggaag 1
gttcaataaagctgtgggaag 1
ptc-miR396b
ggtgtggttgtacgtgaccctctttgtattcTTCCACAGCTTTCTTGAACTGcacctattagattaatgttgatgttgttgtgcgatatgccatgaccatatgacattgtattcatttttgctgcggttcaataaagctgtgggaagatacaaacaggatcaaagaaagttgctatgtc 2781
((..((((...((.(((.(((.(((((((..<<<<<<<<<<<<-<<<<<<<<((.(.....((.(((((((.((((.((..((.(.....)))..)).)))))))))))...))......).))))}}}}}}=}}}}}}}}}}}}==))))))).))).)))......)).))))..))
tctttgtattcttccacagct 4
TTCCACAGCTTTCTTGAACTG 2570 miRNA
ttccacagctttcttgaact 25
ttccacagctttcttgaac 4
ttccacagctttcttgaactgcac 1
ttccacagctttcttg 77
ttccacagctttcttgaactgca 11
ttccacagctttcttgaactgc 51
tccacagctttcttgaact 1
tccacagctttcttgaactg 9
tccacagctttcttgaactgc 1
tccacagctttcttga 1
ccacagctttcttgaactgca 24
ggttcaataaagctgtgggaag 1
gttcaataaagctgtgggaag 1
ptc-miR396c
ctgccatgtttTTCCACAGCTTTCTTGAACTTcctagagcctagaggtgctgctagctatacatataacttaagaagttcaagaaagccgtggaatagcatgaccag 2587
(((.((((((.<<<<<<-<<<<<<<<<<<<<<(((((.(((....)))....)))).................))))))))))))))).)))))).))))))..)))
TTCCACAGCTTTCTTGAACTT 2406 miRNA
ttccacagctttcttgaact 25
ttccacagctttcttgaac 4
ttccacagctttcttgaacttcct 1
ttccacagctttcttgaacttc 59
ttccacagctttcttg 77
ttccacagctttcttgaacttcc 1
tccacagctttcttgaact 1
tccacagctttcttga 1
tccacagctttcttgaactt 12
ptc-miR396e
gtcctggtcatgcttTTCCACAGCTTTCTTGAACTTctttgccttgcttaatctgtgtatatatagatcactacatgtacagctcctatatatataaatatatgtatgtatagcgccatggaagctcaagaaagctgtgggagaacatggcaattcaggat 2684
((((((((((((.((<<<<<<<<<<<<<<<<<-<<<((..((.............(((((((.(((....))).)))))))....(((((((((((......))))))))))).))...))))}=}}}}}}}}}}}}}}}}}}}.))))))....))))))
TTCCACAGCTTTCTTGAACTT 2406 miRNA
ttccacagctttcttgaact 25
ttccacagctttcttgaac 4
ttccacagctttcttgaacttc 59
ttccacagctttcttg 77
tccacagctttcttgaact 1
tccacagctttcttga 1
tccacagctttcttgaactt 12
gctcaagaaagctgtgggaga 71
gctcaagaaagctgtgggagaa 11
gctcaagaaagctgtg 1
ctcaagaaagctgtgggagaa 3
ctcaagaaagctgtgggaga 13
ptc-miR396f
gcacggcttgtagatatatatgggtctcttggtgattTTCCACGGCTTTCTTGAACTGtatatattatcaatggctttttacaagactggaagatggtttccatggagaagaattgtcacaaaaacagttcaagaaagccctgaaaaattatttagaggatctagtttatatatgtctatacaatggctggc 37
((.((((((((((((((((((((((((((..((((((<<-<<-<<<<<<<<<<<<<<<(.........((((..((((((.((....((((((....)))))))))))))).))))........)))))))))))))))).)).))))))))..))).))))).....)))))))))))))....)))))))
ttttccacggctttcttgaact 1
tttccacggctttcttgaact 12
ttccacggctttcttgaact 1
TTCCACGGCTTTCTTGAACTG 20 miRNA
ttccacggctttcttg 1
tccacggctttcttgaact 1
aagccctgaaaaatta 1
ptc-miR398a
gagtctcagtttcatacgacagccggtacaccccagaggagtggctccagagaacacagggggttggttttctagctgtaagctacaagatggacaaagcactcTGTGTTCTCAGGTCACCCCTTtggggcaccctgtggagatgactt 22
(((((...(((((.....((((..(((...((((((({{={{{{{{==={{{{{{{{{(((.(((.(((((.((((.....)))).))))).)))......)))>>>>>>>>>->>>>>>->>>>))))).))))))).))))))))))
ggagtggctccagagaacacagg 2
ggagtggctccagagaacaca 1
ggagtggctccagagaacacag 1
TGTGTTCTCAGGTCACCCCTT 17 miRNA
tgtgttctcaggtcac 1
ptc-miR399f
gatggagctaggcaatacatttatcatttatggctaaagaataacagggctttatcctcctttggcaaacagaacatggaaataaatgcctgcatatttctgtttTGCCAAAGGAGAATTGCCCTGccattcgattccacagttacttgaatgtgtctattgctcttc 132
((.((((((((((...(((((((....((.(((.....((((..((((((...((.((((((((((((((((((.((....))..(((....)))..))))).))>>>>>>>>>>>->>->>>>>>..))))....))).)).....))))))))))))..)))))))
tgccaaaggagaattgccctgc 3
TGCCAAAGGAGAATTGCCCTG 128 miRNA
gccaaaggagaattgccctgc 1
ptc-miR399g
gagtagtgatgaataactgtgcaattctcctttggcagacgtatatggcgttcggacaccaactttggacTGCCAAAGGAGAATTGCCCTGccattcaactacactgcc 139
(.((((((.(((((..(.{={{{{{{{{{{{{{{{{{{=((....(((.((....)).)))....))..)>>>>>>>>>>>>>>>>>->->..)))))....)))))))
gtgcaattctcctttggcagacgt 2
gtgcaattctcctttggcaga 4
gactgccaaaggagaattgccctg 1
tgccaaaggagaattgccctgc 3
TGCCAAAGGAGAATTGCCCTG 128 miRNA
gccaaaggagaattgccctgc 1
ptc-miR403a
ggaagaggcatatttcaggtttgtgcatgaatctaatatagctaaaaaaatcccatcaaacacaaattaaaatactagatagcaatcagcactagtttagtatagtaTTAGATTCACGCACAAACTCGtaatctgtctttttc 214
((((((((((.(((.(.={{{{{{{{={{{{{{{{{{{(.(((((............................(((((...((.....)).))))))))))...)))>>>>>>>>>->>>>>>>>-->.))).))))))))))
ggtttgtgcatgaatctaatatagct 2
ggtttgtgcatgaatctaata 29
tattagattcacgcacaaact 1
ttagattcacgcacaaactcgt 15
ttagattcacgcacaaact 2
TTAGATTCACGCACAAACTCG 160 miRNA
ttagattcacgcacaa 2
tagattcacgcacaaactcg 3
ptc-miR403a
ggaagaggcatatttcaggtttgtgcatgaatctaatatagctaaaaaaatcccatcaaacacaaattaaaatactagatagcaatcagcactagtttagtatagtaTTAGATTCACGCACAAACTCGtaatctgtctttttc 214
((((((((((.(((.(.={{{{{{{{={{{{{{{{{{{(.(((((............................(((((...((.....)).))))))))))...)))>>>>>>>>>->>>>>>>>-->.))).))))))))))
ggtttgtgcatgaatctaatatagct 2
ggtttgtgcatgaatctaata 29
tattagattcacgcacaaact 1
ttagattcacgcacaaactcgt 15
ttagattcacgcacaaact 2
TTAGATTCACGCACAAACTCG 160 miRNA
ttagattcacgcacaa 2
tagattcacgcacaaactcg 3
ptc-miR403b
agaggactcatatctctagtttgttcgtggatctgacgccatcacaaccgttcatttcacgaccatccaatggcgTTAGATTCACGCACAAACTCGcgatctgtctcctct 169
((((((..((.(((.(.{{{{{{{={{{{{{{{{{{{{((((......(((.......)))........))))))>>>>>>>>>>>->>>>>>>->.))).))..))))))
agtttgttcgtggatctgacg 1
ttagattcacgcacaaact 2
TTAGATTCACGCACAAACTCG 160 miRNA
ttagattcacgcacaaactcgc 1
ttagattcacgcacaa 2
tagattcacgcacaaactcg 3
ptc-miR403c
tcttctcccctaacaagaggagtcctatctctggtttgtgcgtggatctgaggccatcacaaccgtccactacacgaccacccaatggctTTAGATTCACGCACAAACTCGcgatctgtctcctctactacaccgaataga 172
(((..((........(((((((.(..(((.(.(((((((((((((((((((((((((.......(((........)))......))))))>>>>>>>>>>>>>>>>>>>->.)))..).)))))))........))..)))
ggtttgtgcgtggatctgaggcc 2
ctttagattcacgcacaaact 2
ttagattcacgcacaaact 2
TTAGATTCACGCACAAACTCG 160 miRNA
ttagattcacgcacaaactcgc 1
ttagattcacgcacaa 2
tagattcacgcacaaactcg 3
ptc-miR472a
agttaacacatatgggaggaatggagagggagtaggattttcggaaggttatcgggtgggtgagcggggaagataactttggtttttgagatagtacttgttaTTTTCCCTACTCCACCCATCCCataggtttccgatcattcctccctctcctcatcactctgcttctcatggcctgtttatct 4366
((..((((..(((((((((...((((((((((..((((..(((((((.((({={{{{{{{{{{{=={{{{{{{((((...(((.((......)).))).))))>>>>>>>-->>->>>>>>>>>-)))).)))))))..))))))))))))))...........)))))))))...))))...))
gagagggagtaggattttcggaa 1
gagggagtaggattttcggaagg 3
gagggagtaggattttcggaaggt 1
gagtaggattttcggaaggttat 12
gagtaggattttcggaaggttatcgg 3
gagtaggattttcgga 2
gagtaggattttcggaaggttatcg 2
gagtaggattttcggaaggtta 5
agtaggattttcggaaggttatcg 837
agtaggattttcggaaggttatcggg 1
agtaggattttcggaaggttatcgg 24
agtaggattttcggaa 19
agtaggattttcggaaggttat 37
agtaggattttcggaaggtta 2
aggattttcggaaggttatcg 1
ggattttcggaaggttatcg 1
ggttatcgggtgggtgagcgggga 2
tcgggtgggtgagcggggaaga 13
cgggtgggtgagcggggaaga 16
cgggtgggtgagcggggaagata 14
cgggtgggtgagcggggaagataa 9
cgggtgggtgagcggg 2
cgggtgggtgagcggggaagat 2
cgggtgggtgagcggggaagataac 2
ggtgggtgagcggggaagat 1
ggtgggtgagcggggaag 7
ggtgggtgagcgggga 1
ggtgggtgagcggggaagata 26
ggtgggtgagcggggaaga 1
cttgttattttccctactccacccatccc 3
ttgttattttccctactccacccat 1
tgttattttccctactccacccatc 1
tgttattttccctactccacccatcc 4
tgttattttccctactccacccatccc 1
tattttccctactccacccatccc 3
attttccctactccac 3
attttccctactccacccatccca 7
attttccctactccacccatcccat 26
attttccctactccacccatcc 4
attttccctactccacccatccc 1
ttttccctactccacccatcc 90
ttttccctactccacccatcccat 9
ttttccctactccacccatcccata 7
ttttccctactccacccatc 3
TTTTCCCTACTCCACCCATCCC 1805 miRNA
ttttccctactccaccc 2
ttttccctactccacccatccca 1
ttttccctactccacc 39
tttccctactccacccatccca 6
tttccctactccacccatcccat 8
tttccctactccacccatccc 46
tttccctactccacccatcccata 7
tttccctactccacccatcc 4
ttccctactccacccatccca 5
ttccctactccacccatcc 1
ttccctactccacccatcccata 274
ttccctactccacccatcccat 286
ttccctactccacccatccc 1
ttccctactccaccca 8
tccctactccacccatccca 1
tccctactccacccatcccat 26
tccctactccacccatcccata 303
tccctactccacccatcc 1
tccctactccacccat 5
ccctactccacccatcccat 2
ccctactccacccatcccata 4
cctactccacccatcccataggt 1
acccatcccataggtttccga 1
cccatcccataggtttccgatc 1
ccatcccataggtttc 1
ccatcccataggtttccgatcattcct 1
catcccataggtttccgatcattcctc 1
catcccataggtttccgatcattcctcc 3
atcccataggtttccgatcattcctcc 5
atcccataggtttccgatcattc 2
cccataggtttccgatcattcctcc 1
ccataggtttccgatc 1
ccataggtttccgatcattcctc 3
ccataggtttccgatcattcctcc 13
cataggtttccgatcattcct 4
cataggtttccgatcattcctc 49
cataggtttccgatcattcctcc 19
cataggtttccgatca 3
ataggtttccgatcattcctcc 175
ataggtttccgatcat 5
ataggtttccgatcattcctc 6
taggtttccgatcattcctcc 3
taggtttccgatcattcctccct 1
aggtttccgatcattc 1
aggtttccgatcattcctccc 4
aggtttccgatcattcctccct 2
ggtttccgatcattcctccct 1
ggtttccgatcattcctccc 1
ttccgatcattcctccctctc 2
tccgatcattcctccctctcc 10
ccgatcattcctccctctcct 1
ptc-miR472b
gcagacagccgccttgaagttgatgttggatgggaggaaatggagagggagtagggttttcggaaggttactggatgggtgagtggggaagataactaagctctgtttgttaTTTTCCCAACTCCACCCATCCCataggtttccgatcattcctccctctcctcatcacctcacctctgctcctctctctttacaagtatgcttggtttgc 4294
(((((((((...(((((((..((.(..(((.((((((....((((((((((..((((..(((((((.(((..((((((((((((.(((((((((((.((((...))))))))>>>>>>>->>>->>>>>>>>>-.))).)))))))..))))))))))))))......)))).)))))...).))...)))..))))...)))..))))))
cagacagccgccttgaagttg 1
agagggagtagggttttcggaaggtta 1
agagggagtagggttttcggaag 2
gagtagggttttcggaaggttactgg 2
gagtagggttttcggaaggttac 2
agtagggttttcggaaggttactgg 11
agtagggttttcggaaggttact 1
agtagggttttcggaaggttactg 37
agtagggttttcggaa 1
gtagggttttcggaaggttactgg 1
ctggatgggtgagtggggaagata 1
ctggatgggtgagtggggaagat 1
tggatgggtgagtggg 1
tggatgggtgagtggggaagataa 4
tggatgggtgagtggggaaga 2
tggatgggtgagtggggaagata 2
gatgggtgagtggggaagata 27
gatgggtgagtggggaagataact 4
gatgggtgagtggggaag 16
gatgggtgagtggggaaga 2
gatgggtgagtgggga 1
gatgggtgagtggggaagat 7
gatgggtgagtggggaagataacta 1
gatgggtgagtggggaagataac 1
atgggtgagtggggaagataa 1
atgggtgagtggggaagataact 1
atgggtgagtggggaagata 2
tgggtgagtggggaagataacta 27
tgggtgagtggggaagataactaa 12
tgggtgagtggggaagataac 2
gggtgagtggggaagata 1
gggtgagtggggaagataactaa 2
gagtggggaagataactaagct 1
agtggggaagataactaagct 1
gggaagataactaagctctgtttgt 1
aagataactaagctctgtttgttattttcc 1
taagctctgtttgttattttcccaactcca 1
aagctctgtttgttattttcccaactcc 1
agctctgtttgttattttcccaactc 1
ctgtttgttattttcccaactcc 3
tgttattttcccaactccaccc 1
tgttattttcccaact 4
tgttattttcccaactccacccat 9
tgttattttcccaactccacccatc 27
gttattttcccaactccacccat 1
gttattttcccaactccacccatc 3
ttattttcccaactccacccat 1
ttattttcccaactccacccatccc 18
ttattttcccaactccacccatc 1
ttattttcccaactccacccatcc 1
tattttcccaactcca 1
tattttcccaactccacccatc 3
tattttcccaactccacccat 1
tattttcccaactccacccatccc 3
attttcccaactccacccatccc 1
attttcccaactccac 4
attttcccaactccacccatcc 43
attttcccaactccacccatcccata 1
attttcccaactccacccatcccat 32
ttttcccaactccacccatcccata 12
ttttcccaactccacccatcccat 14
ttttcccaactccacccat 3
TTTTCCCAACTCCACCCATCCC 2997 miRNA
ttttcccaactccacccatc 2
ttttcccaactccacccatcc 222
ttttcccaactccacccatccca 4
ttttcccaactccacc 45
tttcccaactccacccatccca 1
tttcccaactccaccc 3
tttcccaactccacccatcccat 2
tttcccaactccacccatccc 56
tttcccaactccacccatcccata 1
tttcccaactccacccatcc 5
ttcccaactccacccatcccat 184
ttcccaactccacccatccc 1
ttcccaactccacccatccca 2
ttcccaactccaccca 4
ttcccaactccacccatcc 1
ttcccaactccacccatcccata 36
tcccaactccacccat 1
tcccaactccacccatcccat 11
tcccaactccacccatcccata 10
cccaactccacccatccc 1
cccaactccacccatcccat 5
cccaactccacccatc 1
cccaactccacccatcccata 5
ccaactccacccatcccat 2
caactccacccatcccataggtt 1
acccatcccataggtttccga 1
cccatcccataggtttccgatc 1
ccatcccataggtttc 1
ccatcccataggtttccgatcattcct 1
catcccataggtttccgatcattcctc 1
catcccataggtttccgatcattcctcc 3
atcccataggtttccgatcattcctcc 5
atcccataggtttccgatcattc 2
cccataggtttccgatcattcctcc 1
ccataggtttccgatc 1
ccataggtttccgatcattcctc 3
ccataggtttccgatcattcctcc 13
cataggtttccgatcattcct 4
cataggtttccgatcattcctc 49
cataggtttccgatcattcctcc 19
cataggtttccgatca 3
ataggtttccgatcattcctcc 175
ataggtttccgatcat 5
ataggtttccgatcattcctc 6
taggtttccgatcattcctcc 3
taggtttccgatcattcctccct 1
aggtttccgatcattc 1
aggtttccgatcattcctccc 4
aggtttccgatcattcctccct 2
ggtttccgatcattcctccct 1
ggtttccgatcattcctccc 1
ttccgatcattcctccctctc 2
tccgatcattcctccctctcc 10
ccgatcattcctccctctcct 1
ptc-miR475b
cttctggctttcatagtcataacatcttgatcaatggccattgtaagagtagaaggatccatgaagcaataactctctttgctgaaatgtgcgaccaaatagactcttgatatttcattcTTACAGTGCCCATTGATTAAGatgttataacattgttctcaaagg 133
(((.(((....((..((.(((((((((((((((((((.((((((((((((.((((.((((((..(((((.........)))))...)))...................))).))))))))>>>>>>>>->>>>>>>>>>>>))))))).))..))...))).)))
tcataacatcttgatcaatgg 1
ataacatcttgatcaatggcc 3
ataacatcttgatcaatggcca 2
taacatcttgatcaatggcca 6
taacatcttgatcaatggcc 3
cattcttacagtgcccattg 1
cattcttacagtgcccattga 28
tcttacagtgcccattgatta 1
cttacagtgcccattgat 2
ttacagtgcccattga 2
ttacagtgcccattgatt 1
ttacagtgcccattgat 2
ttacagtgcccattgattaaga 4
TTACAGTGCCCATTGATTAAG 57 miRNA
ttacagtgcccattgattaa 2
tacagtgcccattgattaag 1
tacagtgcccattgattaaga 2
acagtgcccattgattaagat 1
gtgcccattgattaagatgt 2
gtgcccattgattaagatgtt 6
cccattgattaagatgttata 6
ptc-miR475c
gcatttgatcttcatagtcataacatcttgaacaatggccattgtaagagtaagtggtccatgagtcaataactctctttgcagaaatgcatgacaaagcattgactcctatttcacccTTACAATGTCCATTGATTAAGaggttataacattgttatcaaggggt 24
((.((((((...((..((.(((((.((((((.((((((.(((((((((.((((((((.....((((((((.........((((....)))).........)))))))))))))).)).)>>>>>>>>->>>>>>->>>>>).))))).))..))..))))))..))
caaagcattgactcctatttcaccc 1
cacccttacaatgtccattga 3
ccttacaatgtccattgatt 1
ccttacaatgtccattgatta 1
TTACAATGTCCATTGATTAAG 13 miRNA
ttacaatgtccattgattaaga 1
ttacaatgtccattgatta 1
atgtccattgattaagaggtt 3
ptc-miR530a
gaccagcatgccaacatgttgcctttatcTGCATTTGCACCTGCACCTTActtgtttctttcttttgtttttgactccaaaaccaaaagtaagtttgaaacattaaaacaagcttgaggtgcaggtgcaggtgcaggtgaatgccatgttggtgttttgacacttgtc 229
((((((.(((((((((((..((.((((((<<<<<<<<<<<<<<<<<<<<<((((((((((.((((((.(((((....))))).)))))).)))............)))))))..))}}}}}}}}}}}}}}}}}}}}})))).))))))))))))).)))......)))
atctgcatttgcacctgcacc 4
tctgcatttgcacctgcacc 1
tgcatttgcacctgca 1
tgcatttgcacctgcaccttact 1
tgcatttgcacctgcaccttac 5
TGCATTTGCACCTGCACCTTA 202 miRNA
gcatttgcacctgcacctta 6
ttgaggtgcaggtgcaggtgcagg 1
aggtgcaggtgcaggtgcagg 6
tgcaggtgcaggtgcaggtga 2
ptc-miR827
ttgcaaccatgaatatatttgttgatagtcatctagtgaacattgaaagtcataTTAGATGACCATCAACGAAAAcattcatgatattgcaa 36
((((((.(((((((.(.{{{{{{{{{={{{{{{{{{{{.((.......))..))>>>>>>>>>->>>>>>>>>->.)))))))...))))))
tttgttgatagtcatctagtgaac 1
tttgttgatagtcatctagtg 2
atattagatgaccatcaacgaaaa 1
TTAGATGACCATCAACGAAAA 32 miRNA
ptc-miRX107
ggggaaattagcttaaacaccctattgtttgagcgtgaggatacttttcgccctgatttttcataaaattgctctttgaccacgctcaaaagatcttgcaaggaatgtaagtattttcACGCTCAAATATATAAGGTGTTtaacgtaatttatct 5
((..((((((..(((((((((.((((((((((((((((((((((((....((.(((....))).....(((((((((((......)).)))))....)))))).....))))))))))>>>>>>>>>>>->>>->>>>>>)))..))))))..))
ACGCTCAAATATATAAGGTGTT 5 miRNA
ptc-miRX109
gggttaaaactcgaaatcagtcacactcggtcaaactcgtaaaatcagtccgattttaccgattttaaccGAGTTTGATCGATTTCGAGTTttaacct 17
((((((((((((((((((.((((.(((((((.(((.((((((((((.....))))))).))).))).)))>>>>->>>>->>>>>>>>>>>)))))))
ccgagtttgatcgatttcgag 7
ccgagtttgatcgatttcgagt 1
gagtttgatcgatttc 1
GAGTTTGATCGATTTCGAGTT 8 miRNA
ptc-miRX110
tgcagagtagaagtcgAGCTCAAGCACAAATTCGATCttgcttaacaaggtaccggcaaagtcagatcgaatttgggcttgagattgtcttcttcgttgca 209
(((((...(((((.((<-<<<<<<<-<<<<<<<<<<<(.((((.....(....)....)))).)))}}}}}}}}}=}}}}}}}=}}}.)))))...)))))
agctcaagcacaaattcgatct 2
agctcaagcacaaatt 2
agctcaagcacaaattcgat 1
agctcaagcacaaattcg 1
AGCTCAAGCACAAATTCGATC 130 miRNA
agatcgaatttgggcttgagatt 1
tcgaatttgggcttgagat 1
tcgaatttgggcttgagattgt 3
tcgaatttgggcttgagattg 42
tcgaatttgggcttgagatt 22
tcgaatttgggcttgag 1
tcgaatttgggcttga 2
cgaatttgggcttgagattg 1
ptc-miRX117
atggatgggatcagcaaggggcaaagatgcataagagagatgtacaagggtagggaaggggaagagaaagatcgatatcgactacccttcttttTCTCTTATGCATTTTTGTCCCtcgctagtctcacccat 37
((((.((((((.(((.((({{{{{{{{{{{{{{{{{{{{{.....((((((((....((....((......))....))..))))))))...))>>>>>>>>>>>>>>>>>>>>>).))).)))))).))))
ggcaaagatgcataagagaga 2
TCTCTTATGCATTTTTGTCCC 17 miRNA
ctcttatgcatttttgtccct 5
tcttatgcatttttgtccct 2
cttatgcatttttgtccct 1
ttatgcatttttgtccctcgct 1
ttatgcatttttgtccctcgc 6
ttatgcatttttgtccct 2
ttatgcatttttgtcc 1
ptc-miRX12
ggacccatgcatggcgaacaagttgagctgtagggttatgatgaacatgctaattacaagctattgtcttccatggaataggcagtgatggcatttgttttattttcctgaggtggagaaaaacaaatagaccataacactgttatTCCATGGAAGATAATGACTCGtggttgacacttgatctctccagtccagttcagattcaagctagctgctgtct 7
((((....((.((((.......((((((((...((....(((.((..((.(((((((.{{={{{{{{{{{{{{{{{{{{((.(((((((((((((((((((..(((((......)))))))))))))).).))))..)))))))))>>>>>>>>>>>>>>>>->>->)))))).)).)).)))...))....))))))))......))))))....))))
agctattgtcttccatggaat 1
TCCATGGAAGATAATGACTCG 6 miRNA
ptc-miRX124
gtgcatatatatacatgaatgtgcctcatgtctggtatgagcatttgatgattgataatttcaatttgtttacatcttttttctgcaatcctaataccgcgtactttcaaatgtaaagaaattgaaatTATCAATCATCAAATGTTCGTaccatacgtaaggcacactcgtatgtataattgtat 15
(((((..((((((.((((.(((((((.((((.((((((({{{{{{{{{{{{{{{{{{{{{(((((((.(((((((........(((............))).........))))))).))))))))))>>>>>>>>>>>>>>>>>>>>>)))).)))).))))))).)))).))))))..)))))
tctggtatgagcatttgatga 1
agcatttgatgattgataatt 1
gcatttgatgattgataattt 3
catttgatgattgataatttc 3
attatcaatcatcaaatgttc 1
ttatcaatcatcaaatgttcg 1
TATCAATCATCAAATGTTCGT 5 miRNA
ptc-miRX128
cttggttactgatattattttgaaccgtcatgtcaattattggttatatatcgactgaaaatgaaagctatttcactattctgtgcacacaatgcttgaaacattaatcatggtttttgaaagtattggagcaTTGTACACAGAATAGGTGAAATaactttcattttcattcgatacgcaactaaaattgtaaatatagttcagtctcatcttggaagccaag 98
(((((((.(..(.......((((((..(.....(((((.((((((.(.((((((.((((((((((((.((({{{{{{{{{{{{{{==={{{{{((((.((((.....(((.......)))..)).)).)))))>>>>->>>>>>>>>->>>>>>>).)))))))))))).)))))).).))))))))))).....)..)))))).......)..).)))))))
tcgactgaaaatgaaagctat 2
aaagctatttcactattctgt 10
ttcactattctgtgcacacaat 1
attgtacacagaataggtgaaat 1
ttgtacacagaatagg 6
TTGTACACAGAATAGGTGAAAT 56 miRNA
tacacagaataggtgaaataac 1
cagaataggtgaaataactttc 4
aataactttcattttcattcg 1
ataactttcattttcattcgatac 2
taactttcattttcattcgat 2
aactttcattttcattcgata 6
aactttcattttcattcgatac 1
actttcattttcattcgatac 2
tttcattttcattcgatacgc 1
ttcattttcattcgatacgca 2
ptc-miRX13
ggactcatgcatggcgaacaagttgagctgtagggttatgatgaacatgctaattacaagctattgtcttccatggaataggcagtgatggcatttgttttattttcctgaggtggagaaaaacaaggagaccataacactgttatTCCATGGAAGATAATGACTCGtggttgacacttgatctctccagtccagttcagattcaagctagctgctgtct 7
((((....((.((((.......((((((((...((....(((.((..((.(((((((.{{={{{{{{{{{{{{{{{{{{((.((((((((((.((((((((..(((((......)))))))))))))..).))))..)))))))))>>>>>>>>>>>>>>>>->>->)))))).)).)).)))...))....))))))))......))))))....))))
agctattgtcttccatggaat 1
TCCATGGAAGATAATGACTCG 6 miRNA
ptc-miRX130
ccGAGTTTGATCGATTTCGAGTTtttaacccgatttcacacgtactcgtaaaatcgtacgattttacgagttaactcgtaatttgacaacattgg 18
((<<--<<<-<<<<-<<<<<<<<....................((((((((((((....)))))))))))).)))))).)).)))))))..))))
ccgagtttgatcgatttcgag 7
ccgagtttgatcgatttcgagt 1
gagtttgatcgatttc 1
GAGTTTGATCGATTTCGAGTT 8 miRNA
gagtttttaacccgat 1
ptc-miRX133
gtaatgctaaaagccccaaaagttggaacccaaatgttttccctgaatcactcccaccattgattggtgggctccatgcaccaattaaacagtgGGAGTGATTCAGGGAACCCATtcaggctcatcggactcttaggtttgattagtatgc 13
(((.(((((((((((..((.((((.((.((..((({=={{{{{{{{{{{{{{{{{{(..((((((((((.(.....).))))))))))...)))>>>>>>>>>>>>>>>>-->>>)..))....)).)))).)).)))))..)))))))))
gttttccctgaatcactccca 4
ggagtgattcagggaaccc 1
ggagtgattcagggaaccca 2
GGAGTGATTCAGGGAACCCAT 5 miRNA
ggagtgattcagggaacccatt 1
ptc-miRX137
atggatgggatcagcgaggggcaaaaatggcataagagagatgtacagcggttgggaaggggaagagaaagatcgatatctactacccttcctttTCTCTTATGCATTTTTGTCCCtcgccagtctcgcccat 34
((((.((((((..((((((((((((((((.(((((((((((............((((((((....(((.(......).)))....))))))))))>>>>>>>>>>>>>>>>>>>>>))))..)))))).))))
TCTCTTATGCATTTTTGTCCC 17 miRNA
ctcttatgcatttttgtccct 5
tcttatgcatttttgtccct 2
cttatgcatttttgtccct 1
ttatgcatttttgtccctcgc 6
ttatgcatttttgtccct 2
ttatgcatttttgtcc 1
ptc-miRX139
atggatgcgaccggcaagggacaaaaatggcataagagagatgtacaggggtagggaaggggaagagaaagatcgatatctacgccccttcttttTCTCTTATGCATTTTTGTCCCtcgccagtctcgcccat 41
((((.((.(((.(((.(({{{{{{{{{{{={{{{{{{{{((..(((....))).((((((((...(((.(......).)))...)))))))).))>>>>>>>>>>>>>>>>>>>>>).))).))).)).))))
aagggacaaaaatggc 2
aagggacaaaaatggcataaga 2
ggacaaaaatggcataagaga 1
gacaaaaatggcataagagaga 2
TCTCTTATGCATTTTTGTCCC 17 miRNA
ctcttatgcatttttgtccct 5
tcttatgcatttttgtccct 2
cttatgcatttttgtccct 1
ttatgcatttttgtccctcgc 6
ttatgcatttttgtccct 2
ttatgcatttttgtcc 1
ptc-miRX14
ggactcatgcatggcgaacaagttgagctgtagggttatgatgaacatgctaattacaagctattgtcttccatggaataggcagtgatggcatttgttttattttcctgaggtggagaaaaacaaggagaccataacactgttatTCCATGGAAGATAATGACTCGtggttgacacttgatctctccagtccagttcagattcaagctagctgctgtct 7
((((....((.((((.......((((((((...((....(((.((..((.(((((((.{{={{{{{{{{{{{{{{{{{{((.((((((((((.((((((((..(((((......)))))))))))))..).))))..)))))))))>>>>>>>>>>>>>>>>->>->)))))).)).)).)))...))....))))))))......))))))....))))
agctattgtcttccatggaat 1
TCCATGGAAGATAATGACTCG 6 miRNA
ptc-miRX147
ccatttgaaaattagtcgtatatgttcctaaattttgacgggattgtggatccgaccaggtatgacacattgtggtgagaagtacctctatcttcatttttcatgtagatcatcaagtgaaggtatagttactatatcgtaccattgtgcttcatacttgtcagaTCCACAATCCCATCAAGACTTtggagcacatatgacaggttctcagaatgg 14
((((((((.(((..(((((((.((((((.((.((((((.(((((((((((((.(((.((((((((..(((.((((((.((((((.((.(((((((((((...(((.....))).))))))))))).)).))))...)).)))))).)))..))))))))))).))>>>>>>>>>>>->>>>>>->>.)))))).)))))))..))).)))).))))
tgacgggattgtggatccga 1
TCCACAATCCCATCAAGACTT 9 miRNA
tccacaatcccatcaagact 3
ccatcaagactttggagcaca 1
ptc-miRX15
ggactcatgcatggcgaacaagttgagctgtagggttatgatgaacatgctaattacaagctattgtcttccatggaataggcagtgatggcatttgttttattttcctgaggtggagaaaaacaaggagaccataacactgttatTCCATGGAAGATAATGACTCGtggttgacacttgatctctccagtccagttcagattcaagctagctgctgtct 7
((((....((.((((.......((((((((...((....(((.((..((.(((((((.{{={{{{{{{{{{{{{{{{{{((.((((((((((.((((((((..(((((......)))))))))))))..).))))..)))))))))>>>>>>>>>>>>>>>>->>->)))))).)).)).)))...))....))))))))......))))))....))))
agctattgtcttccatggaat 1
TCCATGGAAGATAATGACTCG 6 miRNA
ptc-miRX158
aCCGACCTTAGCTCAGTTGGTGgagcggagggctgtaggtcgctggttggattccggcaaggtcggatttcaattttgtaatttcttttctcaccgaccttagttcagaagttgcattgttttgtctgttgaggtggt 64
(<<-<<<<<<<<-<<<-<<<<<.(((...((((((.((((((.((((((((.((((((...)))))).)))))).................)).))))))))))))....))).)))))..)))...)))))))))))
CCGACCTTAGCTCAGTTGGTG 64 miRNA
ptc-miRX162
atggatgggatcagcgaggggcaaaaatggcataagagagatgtacaagggtgtggaaggggaagagaaagatcgatatctactaccctacttttTCTCTTATGCATTTTTGTCCCtcgccagtctcgcccat 34
((((.((((((..((((((((((((((((.(((((((((((.((...((((((((((.......((......))....))))).)))))))..))>>>>>>>>>>>>>>>>>>>>>))))..)))))).))))
TCTCTTATGCATTTTTGTCCC 17 miRNA
ctcttatgcatttttgtccct 5
tcttatgcatttttgtccct 2
cttatgcatttttgtccct 1
ttatgcatttttgtccctcgc 6
ttatgcatttttgtccct 2
ttatgcatttttgtcc 1
ptc-miRX164
gttaaaactcgaaatcaatcaaactcggtcaaactcgtaaaatcgatctgattttaccgattttaactgagtttgaccGAGTTTGATCGATTTCGAGTTttaac 19
[truncated: 751 more rows]
