# Supplementary material for: Deep Annotation of Populus trichocarpa microRNAs from Diverse Tissue Sets
Source: PLoS One. 2012 Mar 19;7(3):e33034. doi: 10.1371/journal.pone.0033034 (PMC3307732; doi:10.1371/journal.pone.0033034)
Supplement: Table S2 — miRNAs annotated from Leaf sRNA library. (XLSX) [file pone.0033034.s002.xlsx]

## Sheet: Sheet1
Supplemental Table S2
Leaf miRNAs
Alignments of all smallRNA reads and precursor are shown below annotation
miRNA	Sequence	Abundance	Precision	Chromosome	Start	End	Precursor	miRNA*	Orientation	sRNA length	Hairpin Length	Minimum Free Energy	Adjusted MFE	Randfold p-value
ptc-miR1444a	TCCACATTCGGTCAATGTTCC	1093	91.93	scaffold_8	9316683	9316703	TTCGAGTTTATCACTTGAATGTTGACCGAATATGGATGAAAAGTTGTTTTCTGTTTCCTTTCCTCCACATTCGGTCAATGTTCCAGTGATGAGCATGAA((((.((((((((((={{{{{{{{{{{{{{{={{{{.((((.(..(........)..))))).>>>>->>>>>>>>>>>>>>>-)))))))))).))))	TGAATGTTGACCGAATATGGA(44) GAATGTTGACCGAATATGGAT(2) AATGTTGACCGAATATGGATG(55) ATGTTGACCGAATATGGATGA(3) TGTTGACCGAATATGGATGAA(9)	-	21	99	-43.9	-44.3434	0.009901
ptc-miR1444b	CACATTCGGTCAACGTTCGAG	3693	80.88	scaffold_1646	4001	4021	TCGAATATTTCCTTGTTTATCCCTCGAATATTGATCGAATATGTATGAAATATGATGGTTATATGTTTCATTCACATTCGGTCAACGTTCGAGTGATAAACAGAAATAATTGG((((.((((((..(((((({{={{{{{{=={{{{{{{{{{.((.((((((((((.......)))))))))).>>->>>>>>>>>>-->>>>>>.)))))))))))))).))))	TCCCTCGAATATTGATCGAAT(4) CCTCGAATATTGATCGAATAT(5) CTCGAATATTGATCGAATATG(5) TCGAATATTGATCGAATATGT(3) CGAATATTGATCGAATATGTA(771)	-	21	113	-46.4	-41.0619	0.009901
ptc-miR1444c	CACATTCGGTCAACGTTCGAG	3693	80.88	scaffold_10	11417656	11417676	TCGAATATTTCCATTTTTATCCCTCGAATATTGATCGAATATGTATGAAATATGATGGTTAAATGTTTCATTCACATTCGGTCAACGTTCGAGTGATAAACAGAAATAATTGG((((.((((((....(((({{={{{{{{=={{{{{{{{{{.((.(((((((((.........))))))))).>>->>>>>>>>>>-->>>>>>.))))))..)))))).))))	TCCCTCGAATATTGATCGAAT(4) CCTCGAATATTGATCGAATAT(5) CTCGAATATTGATCGAATATG(5) TCGAATATTGATCGAATATGT(3) CGAATATTGATCGAATATGTA(771)	+	21	113	-41.8	-36.9911	0.009901
ptc-miR1446a	TTCTGAACTCTCTCCCTCAAC	323	77.83	scaffold_12	11674484	11674504	GGATGTTGAAGATCCAACTTCTTCTGAACTCTCTCCCTCAACCGCTACTCTAGAGCTTGGCAATCCTTGTCGATTGTTTCTGTGTAGCGGTTGAGGTGAGGGGTTCAGAACATGTTGGCTTCGATGATTC(((((((((((..(((((...<<<<<<<<<<-<<<<<<<<<<((((((.(..((((((((((.....))))))..))))..).))))))))))))).)))))))))))))...)))))))))))).))))	NO	-	21	130	-66.3	-51	0.009901
ptc-miR1446b	TTCTGAACTCTCTCCCTCAAC	323	91.76	scaffold_12	11669855	11669875	TTGAAGATCCAATTTCTTCTGAACTCTCTCCCTCAACCGCCACTCTAGAGGTTGGCACCTTGTCAATTGTTTCTGTGTAGCGGTCGAGGTGAGGGGTTCAGAACATGTTGGCTTTGA(..(((..(((((...<<<<<<<<<<-<<<<<<<-<<(((.((.(.((((((((((.....))))))...))))).)).))))).)))).)))))))))))))...))))))))..)	NO	-	21	117	-50.9	-43.5043	0.009901
ptc-miR1446c	TTCTGAACTCTCTCCCTCAAC	323	93.35	scaffold_12	11790908	11790928	GAATGTTGGAAATCCAACTTTTTCTGAACTCTCTCCCTCAACTGCTATTCTAGAGCTTCCTGAGCTAACCCTTGTGTTTCTGTGTAGCAGTCAAGGTGGGAGGCTCAGAAAATGTTGGTTTCTTAGCTTTTC(((.((((((((.(((((.((<<<<<<-<-<<<<<<<<--<<((((((.(..((((....((((......)))).))))..).))))))))..))).)))))).)))))))).))))))))).))))..)))	NO	+	21	132	-47.2	-35.7576	0.009901
ptc-miR1446e	TTCTGAACTCTCTCCCTCAAC	323	93.35	scaffold_15	12482374	12482394	GTATCAGAATGTTGGTGATCCAACTTTTTCTGAACTCTCTCCCTCAACTGCTATTCTAGAGCTTGTTAATCCTTGTCAAGTGTTTCCCTGTAGCAGTCGAGGCGAGGGGGTTTCGGAAAATGTTGGCTCCTCAGCTCTTAATTAC(((.......(((((.((.(((((.((<<<<<<<<<<<<<<<<<<-<<((((((......(((((...........)))))........)))))))).)))).))))))).))))))))).))))).)).))))).......)))	NO	+	21	145	-57.48	-39.6414	0.009901
ptc-miR1447	CAGAATTGCAGTGCCTTGATT	762	96.46	scaffold_13	14548657	14548677	GTGAACGAAGGAGGCCCTAATCAGGGCACTGCAATTCTAAATGTCTGTTGGCAAGTGGCGATGCCAGACGTTTGAAATTTACTTATCATTTATTAGTCAGAATTGCAGTGCCTTGATTTGGGCTTTGTCTGTTCC(.(((((.(.(((((((.({{{{{{{{{{{{{{{{{{{{{((((((...((((........)))))))))))).......(((...........)))->>>>>>>>>>>>>>>>>>>>.))))))).).))))))	ATCAGGGCACTGCAATTCTAA(1) TCAGGGCACTGCAATTCTAAA(209)	+	21	135	-61.3	-45.4074	0.009901
ptc-miR156a	TGACAGAAGAGAGTGAGCAC	21041	94.74	scaffold_6	19089485	19089504	GAGGGACACAAAAGAAAGACTGACAGAAGAGAGTGAGCACACACGAAAGTATATGGTATGAAGGCATTCCATTGCAGGGTGTGTGCTCACATCTCTTCTGTCAGCTTCCACTTCCAAGTGTTTCCTC(((((((((..(((.(((.(<<<<<<<<<<<<<<<<<<<<((((....(((.((((.(((....))).)))))))...)))))))))))).))))))))))))))))...)))....))).))))))	NO	-	20	127	-62.7	-49.3701	0.009901
ptc-miR156b	TGACAGAAGAGAGTGAGCAC	21041	97.15	scaffold_6	22869970	22869989	AGAATCGAGGGTTTTAAGGGTAAGGGAGGTGACAGAAGAGAGTGAGCACACAGGGTACTTTCTTGCATGACATCCATGCTTGAAACTTTGCGTGCTCACTCTCTATCTGTCACCCCACCACCATCTCTCTCTCTTTCTCTTCCCCTTTCCCTGTCT(((....((((....(((((.((((((((<<<<<<<<<<<<<<<<<<<<.((((((...(((..(((((.....)))))..))))))))).))))))))))))).))))))))).....................)))))).))))).)))).)))	NO	-	20	156	-73.49	-47.109	0.009901
ptc-miR156c	TGACAGAAGAGAGTGAGCAC	21041	94.6	scaffold_6	25766678	25766697	TTCTGGACATTAGAAACTGACAGAAGAGAGTGAGCACACAGAGGCATATTTGTATAAATCTATACCATTGCTTTTGCGTGCTCACTTCTCATTCTGTCAGCTTCCAGAG(((((((....((...(<<<<<<<<<<<<<<<<<<<<.((((((((.....(((((....)))))...)))))))).)))))))).)))).))))))))))))))))))	NO	+	20	109	-53.5	-49.0826	0.009901
ptc-miR156d	TGACAGAAGAGAGTGAGCAC	21041	76.88	scaffold_18	8350113	8350132	GATTCGAGGGTTTTAAGGGTAAGTGAGTTGACAGAAGAGAGTGAGCACACAGGGTACTTTCTTGCATGACGTTCATGCTTGAAGCTTTGCGTGCCCACCCTCTATCTGTCACCCCATCACCATCTCTCCTTCTCTTCCCCTTTCCTTGCCTGTC(((.((((((....(((((.(((.(((.<<<<<<<<<<<-<<<-<<<<.((((((...(((..(((((.....)))))..))))))))).)))).))).)))).)))))))..................))).))).)))))))))))...)))	NO	+	20	154	-54.61	-35.461	0.009901
ptc-miR156e	TGACAGAAGAGAGTGAGCAC	21041	76.87	scaffold_18	2189701	2189720	TTCCAGCTTCTGGGACATTAGAAATTGACAGAAGAGAGTGAGCACACAGAGGCATATTTGTATAAAATTATACCATTGCTTTTGCGTGCTCATTTCTCTTTCTGTCACTTCCAGAGCCGGAA((((.(((.((((((..........<<<<<<<<<<<<<<<<<<<<.((((((((.....(((((....)))))...)))))))).))))))).))))).)))))))).))))))))).))))	NO	+	20	122	-55	-45.082	0.009901
ptc-miR156f	TGACAGAAGAGAGTGAGCAC	21041	94.74	scaffold_18	12448555	12448574	GAGGGTCACAAGAGAAAGACTGACAGAAGAGAGTGAGCACACACGAAAGCTAATTGTATGAAAGCATACCATTGCAGGGTGTGTGCTCACTTCTCTTCTGTCAGCTTACATTTGCCAGTGTTTCCTC(((((.(((.(((..(((.(<<<<<<<<<<<<<<<<<<<<((((....((.(((.(((((....))))).)))))...)))))))))))).))))))))))))))))...)))....)))..)))))	NO	-	20	127	-61.6	-48.5039	0.009901
ptc-miR156g	TTGACAGAAGATAGAGAGCAC	56612	95.76	scaffold_5	11875605	11875625	TTGAATTATGTGAGGAGGCACTGGTGATGTTGTTGACAGAAGATAGAGAGCACAGATGATGAAATGCATGGAGCTTAATTGCATCTCACTCCTTTGTGCTCTCTAGTCTTCTGTCATCACCTTCAGCCCCTCACTCCGTTTAA((((((...((((((.(((...(((((.....-<<<<<<<<<<<<<<<<<<<<(((.(((((.(((((...........))))).))).)).)))))))))))).))))))))))))))))....)))))))))...))))))	NO	-	21	143	-68.7	-48.042	0.009901
ptc-miR156h	TTGACAGAAGATAGAGAGCAC	56612	94.65	scaffold_4	7938904	7938924	GTGAAGGAGGCACTGGTGATGCTGTTGACAGAAGATAGAGAGCACTGACGATGAAATGCATGGAGCTTAATTGCATCTCACTCCTTTGTGCTCTCTAGTCTTCTGTCATCACCTTCAGCCCTTCAC(((((((..((...(((((.....-<<<<<<<<<<<<<<<<<<<<.((.(((((.(((((...........))))).))).)).)).))))))))).))))))))))))))))....)))))))))	NO	-	21	126	-57.1	-45.3175	0.009901
ptc-miR156i	TTGACAGAAGATAGAGAGCAC	56612	95.76	scaffold_12	4332130	4332150	GGGAGTTGTGTGGAGAGGAGGCACTTGTGATGTTGTTGACAGAAGATAGAGAGCACAGATGATGTTTTGCAGTAGACTCTGGATCTCACTCCTTTGTGCTCTCTATGCTTCTGCCATCACCTTCAGCCCCGACCCCCAGTCCCC(((..(((.(.((...((.(((....((((((...--<-<<<<<<<<<<<<<<<<<(((.((((...(.(((......))).)...)).)).)))))))))))))).))))))))))))).....)))))...))))))..)))	NO	-	21	144	-57.7	-40.0694	0.009901
ptc-miR156j	TTGACAGAAGATAGAGAGCAC	56612	95.75	scaffold_15	4013709	4013729	GGGGGAGAAGGAGGCACTGGTGATGTTGTTGACAGAAGATAGAGAGCACAGATGATGATATGCAATGGACTCTGCATCCCACTCCTTTGTGCTCTCTATGCTTCTGTCATCACTTTCAGCCCCGACCCCCTCCTCCTCCTCCTCC(((((((.((((((....((((..((((-<<<<<<<<<<<<<<<<<<<<(((.((((..(((((........)))))..)).)).)))))}}}}}}}}}=}}}}}}}}}==.....))))..).)))....)))))).)))))))	GCTCTCTATGCTTCTGTCATC(3)	+	21	145	-71.4	-49.2414	0.009901
ptc-miR156k	TGACAGAAGAGAGGGAGCAC	62	92.54	scaffold_11	11956186	11956205	TAGGGCTTGAATGAGAGGGAGAGAAGAAGAGAAGAGGTGTGAGGTTATGCATGCTGACAGAAGAGAGGGAGCACAACCCTGTAATAGCTAAAGAGAGTCTTTGCTTTTGTTGGACTGTGCTTTCTCTTCTTCTGTCACCAACCAACACAGTATCTTCTCTCTGATCTGATGTGATCCACTA(((((.(((.((.(((.((((((((((.........((((..(((......((.<<<<<<<<<<<<<--<<<<<(..((..(((.(((.((((.....))))))).)))..))..))))))..))).)))))))))).))))).))))....))))))))))..))).)).))).)).)))	NO	-	20	181	-70.12	-38.7403	0.009901
ptc-miR159b	TTTGGATTGAAGGGAGCTCTA	518	46.75	scaffold_15	4261837	4261857	TGGAGCTCCTTGAAGTCCAATAGAAGCTCCTGCTGGGTAGATCGAGCTGCTGAGCTATGAATCCCACAGCCCTATCACCATCAGTCATTTTGATGGGCCTGCGGCTTGCATATCTCAGGAGCTTTATTACCTAATGTTAGATCTTTTTTTGGATTGAAGGGAGCTCTA(((((((((((..(((((((.(((((.((..(((((((((...(((((.(((((.((((....((.(((.(((((((.............))))))).))).))....)))).))))).)))))..)))))))..))..)).)))))->>>>>>>-->>>>>>>>>>>	NO	+	21	168	-74.32	-44.2381	0.009901
ptc-miR160a	TGCCTGGCTCCCTGTATGCCA	13	86.67	scaffold_1	43414069	43414089	AGAAGAAGGTGACATGGGTTATGCCTGGCTCCCTGTATGCCACAAGCAAAGACCAATCTTTTGTTTTAGATTGGCTGTTGCCGGTGGCGTGCGAGGAGCCAAGCATACTCTCTCTTTCTCT(((.(((((.((...((((.(<<<-<<<<<<<-<<<<<<<<<(..((((((.(((((((........))))))))).))))..)))}}}}}}}=}}}}}}}=}}}}}))))).))))))))	GCGTGCGAGGAGCCAAGCATA(3)	+	21	121	-62.4	-51.5702	0.009901
ptc-miR160b	TGCCTGGCTCCCTGTATGCCA	13	100	scaffold_8	2253438	2253458	ACCATGCATCCATATATATTATATGTGCCTGGCTCCCTGTATGCCATTTGCAGAGCCCAACGGATCCTCGATGGCCTCCGTGGATGGCGTATGAGGAGCCATGCATATTCGCATGTATATTATACATGGT((((((.....((((((((...(((<<<-<<<<<<<--<<<<<<<<((..(.(((.(((.(((....))).))).))).)..))}}}}}}}}==}}}}}}}=}}})))....))))))))....))))))	TGGCGTATGAGGAGCCATGCA(1) GCGTATGAGGAGCCATGCATA(3)	-	21	130	-63.1	-48.5385	0.009901
ptc-miR160c	TGCCTGGCTCCCTGTATGCCA	13	100	scaffold_10	19585222	19585242	CCATCATGCATCCATATATATTATATGTGCCTGGCTCCCTGTATGCCATTTGCAGAGCCCACCGGTTCTTCGATGGCCTCCGTGGATGGCGTATGAGGAGCCATGCATATTCACATGTATATATCCATGGTTTTCACTTGCAGATGG(((((.((((.((((((((((...(((<<<-<<<<<<<--<<<<<<<<((..(.(((.(((.(((....))).))).))).)..))}}}}}}}}==}}}}}}}=}}})))......)))))))....)))........)))))))))	TGGCGTATGAGGAGCCATGCA(1) GCGTATGAGGAGCCATGCATA(3)	+	21	147	-66.6	-45.3061	0.009901
ptc-miR160d	TGCCTGGCTCCCTGTATGCCA	13	92.86	scaffold_11	17793905	17793925	GCATCGAAGAAGGAGGTGAAATGGGTTATGCCTGGCTCCCTGTATGCCACAGCAAAGACCAATCTCTTCTGTCTTAGATTGGCTGCTGCCGGTGGCGTGCGAGGAGCCAAGCATACTCTCTCCTTTCTATCTCTATGT((((.((.((((((((.((...((((.(<<<-<<<<<<<-<<<<<<<<<(.(((.((.(((((((..........)))))))))..)))..)))}}}}}}}=}}}}}}}=}}}}})))..)))))))).)))).))))	GCGTGCGAGGAGCCAAGCATA(3)	-	21	138	-63.4	-45.942	0.009901
ptc-miR162a	TCGATAAACCTCTGCATCCAG	585	98.98	scaffold_12	5079402	5079422	GGTGGTTGGGAAGACACTGGAGGCAGCGGTTCATCGATCTCTTCCTGGCCAATTTTTTGTTTAGCACGAAAAACATGAACCGATCGATAAACCTCTGCATCCAGCGCTTCCTTTATTCCCC((.((..((((((.(.(((((.((((.((((.(((((((..(((.((.....((((((((.....)))))))))).)))..))>>>>>->>>>->>>>->>>>>.))))))).....))))	NO	+	21	121	-48.4	-40	0.019802
ptc-miR162b	TCGATAAACCTCTGCATCCAG	585	98.82	scaffold_15	6727328	6727348	ATGTAAAGAAGAGATTGCTTTTGAGTTTGGTTGAGAAGACACTGGAGGCAGCGGTTCATCGATCTTTTCCTGAAGATTTTTTTGTTTTACACGAACAACACGAACCGATCGATAAACCTCTGCATCCAGTGCTTCCCTTACTCCACTTTTTTTTCTTTTCAT(((.((((((((((..(.....((((..((....((((.(((((((.((((.((((.(((((((..(((.((.........((((((.....)))))))).)))..))>>>>>->>>>->>>>->>>>>))))))))..))))..)..)))))))))).)))	NO	+	21	162	-56.2	-34.6914	0.009901
ptc-miR164a	TGGAGAAGCAGGGCACGTGCA	2490	99.12	scaffold_2	16570537	16570557	GGGCGAGCGGTTCCTTGCTGGAGAAGCAGGGCACGTGCAAAATCCTGATGAAGTGCTTACACTTTGCACGCGCTCTTCTTCTCCAACACGGGCTCCTCACCT(((.(((.(((.((.((.<<<<<<<<-<<<<<-<<<<<<(...........((((....)))))))}}}}=}}}}}=}}}}}}}}=}).))))).))).)))	CACGCGCTCTTCTTCTCCAAC(1)	+	21	102	-46.9	-45.9804	0.009901
ptc-miR164d	TGGAGAAGCAGGGCACGTGCA	2490	99.12	scaffold_14	9081121	9081141	GCCAACCAAGGGAATGGAATTCTGATGGGTGGGTGGCTCACGCTGGAGAAGCAGGGCACGTGCAAAATCCTTCTCGGCTTCCAGATGCTGATGAAGCACTCTTTGCACGTGCTCCCCTCCTCCAACATGAGTTCCTCACCCCTGTCTCTCTTCAGTCTCCATTGCTGAAAGC((.......((.((((((...((((.(((((((..(((((.(.<<<<<-<<--<<<<<<<<<<<((...(((((((((........))))).)))).....)))))))))))))..)).))))).).)))))..)))))))..........))))..)))))).))....))	NO	+	21	172	-75	-43.6047	0.009901
ptc-miR164e	TGGAGAAGCAGGGCACGTGCA	2490	97.92	scaffold_16	12933933	12933953	AGGTGTGTGTGAGCAAGATGGAGAAGCAGGGCACGTGCATTACTAACTCATGCACACAGAGTGAGAGAGACATTTCTTGCTGGAGTTATGACTCTTACCTACTATAGATTGTGTTGGCTTCAGCGAGTTAGTTCTTCATGTGCCTGTCTTCCCCATCATGATCACTACCACACCT(((((((.((((.((.((<<<-<<<<--<<<<<<<<<--..((((((((.............((((((....))))))((((((((((..(((((..........)))..))..))))))))))))))))))....}}}}}}}}}==}}}}=}}}}}.)).))))...)))))))	CATGTGCCTGTCTTCCCCATC(1)	+	21	175	-71.3	-40.7429	0.009901
ptc-miR166a	TCGGACCAGGCTTCATTCCCC	140119	97.91	scaffold_1	8837365	8837385	GAAATGGAAGCTATTTCTTTTGAGGGGAATGTTGTCTGGCTCGAGGTCACTAATGGGATCTATGATTTTATCTCAATTGATTGATTTTCTTTTAAATTCTAGTAAATTGAATTGAGAGATATCATGATCAACTTATATTTAATGATGTCGGACCAGGCTTCATTCCCCCCAATTGTTTCTTCCTTTC((((.(((((......(..(((.(({{{{{{=={{{{{{=={{{={(((..((((.((((.(((((....(((((((...(..((((.((..........)).))))..))))))))...)))))))))......))))...)))).>>>-->>>>>>-->>>>>>>>.)))..)...)))))))))	GGAATGTTGTCTGGCTCGAGG(343)	+	21	187	-63.8	-34.1176	0.009901
ptc-miR166b	TCGGACCAGGCTTCATTCCCC	140119	97.15	scaffold_2	2744865	2744885	TCTTTCTCCTCTTTCGCATGTATTAACTGTTGAGGGGATTGCTGTCTGGTTCGATGTCATTCATGTGAAGCTTTAACATTAATGTAGTATTGAGTGATTTCGGACCAGGCTTCATTCCCCCCAACTATATTTGTTTAGCATTCGGAGGGTGTAATAAGA((((...(.(((((((.((((...(((.((((.(((((.((..(((((((((((.((((((((.(((..((.(((....))).))..))))))))))).>>>>>>>>>>>-->>->>>>>.)))).......)))..)))).))))))).)....))))	NO	+	21	159	-57.8	-36.3522	0.009901
ptc-miR166c	TCGGACCAGGCTTCATTCCCC	140119	97.92	scaffold_2	13513596	13513616	GGGAGCATCTTTTTTTGAGGGGAATGTTGTCTGGCTCGAGGACTCTTTCTTGATCAGTCTGATCAAGTGTTCTATCTTTAGATCTAATATCTTAGATCATGTGTTAGGGTCGTCGGACCAGGCTTCATTCCCCCCAATTATTGCTTCC(((((((....(..(((.(({{{{{{=={{{{{{=={{{={(((((..(((((((.....))))))).............(((((((....))))))).......)))))).>>>-->>>>>>-->>>>>>>>.)))..).)))))))	GGAATGTTGTCTGGCTCGAGG(343) GAATGTTGTCTGGCTCGAGGA(1)	+	21	148	-67.1	-45.3378	0.009901
ptc-miR166d	TCGGACCAGGCTTCATTCCCC	140119	97.09	scaffold_5	4841700	4841720	GATATGCATGTGCGTGAGTTGAGGGGAATGTTGGCTGGCTCGAAGCTTAAGCAAAGAGTTTTCTCTCAAGAAACAACTGTTAAGGCTTCGGACCAGGCTTCATTCCCCTCAACCAATAAACTTATGTATGCATTTT((.((((((..((((((((((((({{{{{{=={={{{{=={{{{{(((.((((....(((((.......)))))...)))).)))))>>>-->>>>->-->>>>>>>>)))........)))))))))))))).))	GGAATGTTGGCTGGCTCGAAG(9)	-	21	136	-59.1	-43.4559	0.009901
ptc-miR166e	TCGGACCAGGCTTCATTCCCC	140119	97.15	scaffold_5	22785321	22785341	CCTCACCCCATCTCTCCCTCTCGCGTATTAACTGTTGAGGGGATTGTCGTCTGGTTCGATGTCATTCATGAGAAGCTCAAACATAAACGTAATATTGAATGATTTCGGACCAGGCTTCATTCCCCCCAACAATGTTTGATTAGCGTTCACAGAATGGATTGAGG(((((..((((.(((......(((.....((((((((.(({{{={{=={{{{{{{{{{{={(((((((.(((...)))..((......)).....)))))))).>>>>>>>>>>>-->>->>>>>.)))))..)))......))).....)))))))..)))))	GGATTGTCGTCTGGTTCGATG(1) GATTGTCGTCTGGTTCGATGT(2)	-	21	164	-63.8	-38.9024	0.009901
ptc-miR166f	TCGGACCAGGCTTCATTCCCC	140119	97.09	scaffold_7	3117092	3117112	AAGGTGTGTGGGTGTGTTGAGGGGAATGTTGGCTGGCTCGAAGCTTAAGCAAAGAGTTTCCTAACATGAAACAACTGTTAAGGCTTCGGACCAGGCTTCATTCCCCTCAAACATACAAGCTTATTTT((((((.((..((((((((((({{{{{{=={={{{{=={{{{{(((.((((....(((((.......)))))...)))).)))))>>>-->>>>->-->>>>>>>>)).)))))))..)).))))))	GGAATGTTGGCTGGCTCGAAG(9)	-	21	127	-60.1	-47.3228	0.009901
ptc-miR166h	TCGGACCAGGCTTCATTCCCC	140119	86.74	scaffold_10	9569716	9569736	TGATTGCTACACAGTTGAGGGGAATGCTGTCTGATTCGAGACCATTCACTTTAAGCACACATTCATCTTTCGAATGATCTCGGACCAGGCTTCATTCCCCCCAACTCAAAATCA(((((.......(((((.((((((((..(((((.(((((((.(((((........................))))).))>>>>>->>>>>-->>>>>>>>.)))))...)))))	NO	+	21	114	-43.06	-37.7719	0.009901
ptc-miR166i	TCGGACCAGGCTTCATTCCCC	140119	97.77	scaffold_12	2466425	2466445	GGAAGCTTGTCTTTTGAGGGGAATGTTGTTTGGTTCAAGGCCTGGCCACCCCATGTCTTGGAATTTAAAATATCATGTCCTCGGACCAGGCTTCATTCCCCTCAATTACTGCTTCC((((((..((...(((((({{{{{{=={{{{{{{{{={{{(.(((.....))).)))).(((...............)))-->>>>>>>>>-->>>>>>>>))))..)).))))))	GGAATGTTGTTTGGTTCAAGG(1)	-	21	116	-50.16	-43.2414	0.009901
ptc-miR166j	TCGGACCAGGCTTCATTCCCC	140119	97.91	scaffold_14	7398300	7398320	GGTAGCTTCTTTTTTGAGGGGAATGTTGTCTGGCTCGAGGACTTTTTGTTCATCAATCTAATCGAACTTTCTACCTGTAGATCTAGTATCTTATTTAAGATTGATCACGTATTAGGGTTGTCGGACCAGGCTTCATTCCCCCCAATCATTGCTTCC((.(((.......(((.(({{{{{{=={{{{{{=={{{={(((((.(((..((((((((((..(((((.((((....))))...))).))....)).)))))))).)))....)))))).>>>-->>>>>>-->>>>>>>>.))).....))).))	GGAATGTTGTCTGGCTCGAGG(343) GAATGTTGTCTGGCTCGAGGA(1)	+	21	156	-55.3	-35.4487	0.009901
ptc-miR166k	TCGGACCAGGCTTCATTCCCC	140119	97.91	scaffold_14	7412333	7412353	GGTAGCTTCTTTTTTGAGGGGAATGTTGTCTGGCTCGAGGACTTTTTGTTCATCAATCTAATCGAACTTTCTACCTGTAGATCTAGTATCTTATTTAAGATTGATCACGTATTAGGGTTGTCGGACCAGGCTTCATTCCCCCCAATCATTGCTTCC((.(((.......(((.(({{{{{{=={{{{{{=={{{={(((((.(((..((((((((((..(((((.((((....))))...))).))....)).)))))))).)))....)))))).>>>-->>>>>>-->>>>>>>>.))).....))).))	GGAATGTTGTCTGGCTCGAGG(343) GAATGTTGTCTGGCTCGAGGA(1)	+	21	156	-55.3	-35.4487	0.009901
ptc-miR166l	TCGGACCAGGCTTCATTCCCC	140119	97.77	scaffold_15	541786	541806	GCTAGCTAGGAAGCTTAACTTTTGTGGTGAATGTTGTCTGGTTCAAGGCATGGCCACCACATCTCTTGGTGAATATATGTCCTCGGACCAGGCTTCATTCCCCTCAATTAATGCTTCCATACATGC((......((((((((((...(((.((.(((((..(((((((((.(((((((..(((((.......)))))....)))).))>->>>>>>>>>-->>>>>->>.))))))).))))))......))	NO	-	21	126	-49.2	-39.0476	0.009901
ptc-miR166m	TCGGACCAGGCTTCATTCCCC	140119	86.67	scaffold_15	5751475	5751495	AAGGGCGTGTTGTTTTAGGAAAGTGAGGATGTGGGGGAATGTCGTCTGACTCGAGACAACAGGTAAACTGAAGGAATGGCCGGAGTTTAAGAGTTCTCTCGGACCAGGCTTCATTCCCCTCATCCACACCTTCTCCTCCTCGACCTT((((.((.(..(.....((((.(((.(((((.(((({{{{{=={{{{{=={{{{{{=(((...((((((...((.....))..))))))...))).))>>>>-->>>>>-->>>>>>>>)))))).))).)))).)..).)).))))	GAATGTCGTCTGACTCGAGAC(1)	-	21	147	-57.8	-39.3197	0.029703
ptc-miR167a	TGAAGCTGCCAGCATGATCTAA	1167	69.18	scaffold_2	3062255	3062276	TCGTGCACCACTAGCAGTTGAAGCTGCCAGCATGATCTAACTTCCTTGCTTCTTTATCAAGGATGGATTTAGATCATGTGGTGGTTTCACCTGTTGATGGCACCACGG(((((..(((.((((((.<<<<<<--<<<-<<<<<<<<<<((((((((.........)))))).))..}}}}}}}}}}}}}==}}}}}}.)))))).)))...)))))	TTAGATCATGTGGTGGTTTCA(1)	-	22	108	-49.4	-45.7407	0.009901
ptc-miR167b	TGAAGCTGCCAGCATGATCTA	416	74.42	scaffold_2	3064853	3064873	GTTCACTAGGGAAAAAGTGAAGCTGCCAGCATGATCTATCTTTGGTTAGAGAAAGAAAGGACTAACCCTAGCTAGGTCATGCTGTGACAGCCTCACTCCTTCCTATTTGGGGAC((((.((((((((..((<<<-<<<<<<<<<<<<<<<<<.((..((((((............))))))..)).)))))))))))).).)))).)))))..)))))...)))))))	NO	-	21	114	-49.9	-43.7719	0.009901
ptc-miR167c	TGAAGCTGCCAGCATGATCTAA	1167	69.09	scaffold_5	22458172	22458193	GTTGATCATCTCTCGTGCACCACTAGCAGTTGAAGCTGCCAGCATGATCTAAATTAACCTCCTTCTTTATCAAGGATGGATTAGATCATGTGGTAGTTTCACCTGCTGATGGCATCACGAAAAAACCCTAGC((((........(((((..(((.((((((.<<<<<<<<<<<-<<<<<<<<<<.....(((((((.......))))).)).}}}}}}}}}}}}}}}}}}}}}.)))))).)))...)))))........))))	TTAGATCATGTGGTAGTTTCA(2) AGATCATGTGGTAGTTTCACC(2)	+	22	132	-53.7	-40.6818	0.009901
ptc-miR167d	TGAAGCTGCCAGCATGATCTA	416	74.42	scaffold_5	22447930	22447950	GTGGTTAAAAGAAGTTCACAAGGGAAAAGGTGAAGCTGCCAGCATGATCTATCTTTGGTTAGAGAAGGATAGAAGCGAAAGAACTAACCCTAGCTAGGTCATGCTCTGACAGCCTCACTCCTTCCTATTTGGGGACCCAT((((.........((((.((((((((..((<<<-<<<<<-<<<<<<<<<<<.((..((((((.............(....)..))))))..)).)))))))))))..).)))).)))))..)))))..))).))))))))	NO	+	21	140	-47.76	-34.1143	0.019802
ptc-miR167e	TGAAGCTGCCAGCATGATCTGA	802	46.63	scaffold_5	3575889	3575910	GAGCGGATAGACCTAATCATGCACCACTAGTAGTTGAAGCTGCCAGCATGATCTGAACTTTCCTTAATTTTCCTATACGGGAAAGACTAGATCATGTGGTAGTTTCATCTATTGATGGTAGCATGGGAAACCCTAATCAGCTT((((.(((((......((((((((((.((((((.<<<<<<<<<<<-<<<<<<<<<-.(((((((..............)))))))==}}}}}}}}}}}}}}}}}}}}.)))))).)))).))))))......)).))).))))	ACTAGATCATGTGGTAGTTTCA(1) CTAGATCATGTGGTAGTTTC(2) CTAGATCATGTGGTAGTTTCA(5) AGATCATGTGGTAGTTTCATC(5)	+	22	143	-61.64	-43.1049	0.009901
ptc-miR167f	TGAAGCTGCCAGCATGATCTTA	2471	88.85	scaffold_10	10015971	10015992	TCGTGCACCTCTATCAGTTGAAGCTGCCAGCATGATCTTAGCCTTCCTCCTTTGTTGAGGAAAGAAACAGATCATGTGGCAGTTTCACCTGTTGTTGGTATCACGA(((((.(((..((.(((.<<<<<<<<<<<-<<<<<<<<--.(.((((((.......)))))).)..==}}}}}}}}}}}}}}}}}}).))).))..)))..)))))	ACAGATCATGTGGCAGTTTC(1) AGATCATGTGGCAGTTTCACCT(1) AGATCATGTGGCAGTTTCAC(1) AGATCATGTGGCAGTTTCACC(39)	-	22	106	-49.1	-46.3208	0.009901
ptc-miR167g	TGAAGCTGCCAGCATGATCTTA	2471	88.79	scaffold_8	10561914	10561935	TCGTGCACCACTATCAGTTGAAGCTGCCAGCATGATCTTAACCTCCCTCCTTTGTCGAGGAAAGAACAGATCATGTGGCAGTTTCACCTGAAGTTGGTATCACGA(((((.((((((.((((.<<<<<<<<<<<-<<<<<<<<--.....((((.......)))).....==}}}}}}}}}}}}}}}}}}).)))))).))))..)))))	ACAGATCATGTGGCAGTTTC(1) AGATCATGTGGCAGTTTCACCT(1) AGATCATGTGGCAGTTTCAC(1) AGATCATGTGGCAGTTTCACC(39)	+	22	105	-48.74	-46.419	0.009901
ptc-miR168a	TCGCTTGGTGCAGGTCGGGAA	2680	98.89	scaffold_3	4412399	4412419	TTACCGGCGGTCTCTGATTCGCTTGGTGCAGGTCGGGAACTGATTCGGCGATTTGATTGCCAGATGGCTCGACATGACTGGTTGTTGTGGAAAAAGAAAAGGAAGGAAACAGGAAAAAAAACAAAGAATAGCGAATTGGATCCCGCCTTGCATCAACTGAATCGGAGGCCGCGGTGA((((((.(((((((((((<<<-<<<<<<<<<<-<<<<<-(..(((((.(..((((...(((....)))....((..((.....))..))...............(....)...........)))).....))))))==}=}}}}}=}}}}}}}}}}=))))))))))))))))))))	TGGATCCCGCCTTGCATCAAC(1) CCCGCCTTGCATCAACTGAAT(69)	-	21	177	-78.6	-44.4068	0.009901
ptc-miR168b	TCGCTTGGTGCAGGTCGGGAA	2680	98.82	scaffold_4	22942314	22942334	TTACCGGCGGTCTCTAATTCGCTTGGTGCAGGTCGGGAACTGATTCGGCGATTTGATTGCCAGATGGCTAAACACGATTGGCTGTGAGGCAAATTATAAAAAGAAAGAGAATTGGATCCCGCCTTGCATCAACTGAATCGGAGACCGCGGTGA((((((.(((((((..((<<<-<<<<<<<<<<-<<<<<-(..((((..(....((((((((..((((((((......))))))))..))).)))))......).....))))==}=}}}}}=}}}}}}}}}}=)))))..)))))))))))))	TGGATCCCGCCTTGCATCAAC(1) CCCGCCTTGCATCAACTGAAT(69)	-	21	153	-72.8	-47.5817	0.009901
ptc-miR169a	CAGCCAAGGATGACTTGCCGA	79	90.8	scaffold_1	3089924	3089944	GCACAAAGTGGTATGCAGCCAAGGATGACTTGCCGACTTAACTGATCTGTATAAATTAATGCATGTGTAGTCAAAATTACTACTACTATATATTAATCTGATCTGTGACCACAAATTAACTAACTACTAGCTAGTAATTAGTTGGCAAGTTGTCCATGGCTACATGCTGCTTTTTGC(((.((((..(((((-<<<<<-<<<--<<<<<<<<<((..((((....(((...(((((((.(((((((((.......))))).)).)).))))))).((((.(((....))).))))......)))....))))....)))))))))))..))).))))).)))))..)))).)))	NO	-	21	177	-63.3	-35.7627	0.009901
ptc-miR169aa	TCGAGCCAAGAATGACTTGTCG	172	49.86	scaffold_18	14336835	14336856	TCTTGAGTGTCTTCCATGAAAACATAAAGAGTAGAGATCGAGCCAAGAATGACTTGTCGGCAGGCTAGCAATTGCTACGTATAGAGCAATATGTATGCTAGAATGAGTATTCCGCCAGGTCGTTCTTGGCTCAACTTTGCTCTTCGTTTTCTCATGCGAGCCTCTCAAGA(((((((.(.(((.(((((.((.(..((((((((((.--<<<<<<<<<<<<<<<<<-<<(((..((((((((((((.(.....))))))).....))))))..))......))).)))))))))))))))))..))))))))))..).)).))))).))).).)))))))	NO	-	22	170	-77.8	-45.7647	0.009901
ptc-miR169c	CAGCCAAGGATGACTTGCCGA	79	89.77	scaffold_19	4971730	4971750	GCCTTGCATGGAGGCTCATAAAGTTTGATGCAGCCAAGGATGACTTGCCGACGACTCAATTTTTGCTTCCATATGGTAGAAGAGATGAATAGGTTGGCAGGTTTTCCTTGGCTACATTTTCCTTTCTGCTCCTCCTGCTAGGT((((.(((.(((((..((.((((...((((-<<<<<<<<<-<<<<<<<<<<(.(.(((.(((((.((.((....)).))))))).))).)..))))))))))).))))))))).))))...)))).))..)))))))).))))	NO	-	21	143	-65.6	-45.8741	0.009901
ptc-miR169d	CAGCCAAGGATGACTTGCCGG	8	53.33	scaffold_6	5569370	5569390	GGTCTAGGAGTTTTGCATGAAGAGGTAGAGAGTCGAATGCAGCCAAGGATGACTTGCCGGCATTTCCTCCTAAGTAGCGAGCCCGGCAAGGCTTCTATTTGGCACGCCCGGCCGGCGGGTTGTCCTTGGCTATATTTGGTTCCCTTCTTCTCATGTGAAACTCCAGGCC(((((.(((((((..(((((.((((.((.((..((((((-<<<<<<<<<--<<<<<<<<<(........((((((((.(((((......)))))))))))))........))))))))))..))))))))).))))))..)).)).)))))))))..))))))))))))	NO	-	21	169	-98.69	-58.3965	0.009901
ptc-miR169g	CAGCCAAGGATGACTTGCCGG	8	53.33	scaffold_414	13080	13100	GGTGTAGGGGTTTTGCATGAAGAGGTAGAGAGTAGAATGCAGCCAAGGATGACTTGCCGGCATTTCCTCCTAGGTAGCTAGCAAGCCTTCTATTTGGCATGCCTGTCCGGCAGGTTGTCCTTGGCTAAATTTTGTTCTCTTCTTCTCATGTGAGACTCCAGGCC(((.(.(((((((..(((((.((((.((((((((((((.-<<<<<<<<<--<<<<<<<<<((...((.....))......(((.(((........))).))).)).)))))))))..)))))))))..)))))))))))).)))))))))..)))))))).)))	NO	+	21	164	-88.2	-53.7805	0.009901
ptc-miR169i	TAGCCAAGGATGACTTGCCTG	17	94.44	scaffold_1	31302535	31302555	GAGGAAGAGAGGCCTAGCATGAAGGTAAAGAGTCTTGTTTGGTAGCCAAGGATGACTTGCCTGCTCCATTGTAGGAGGTTTCCGAAAAAATGCAGACATGTATAATTTCGAAACCCCTGTTTCGTTTCAGGCAGTCTCCTTGGCTAACTTGACTGGCTCTTTCCTGCCATGCTATGCCCTTCTCTTCTTC(((((((((((((.(((((((.(((.((((((((..(((.((<<<<<<<<<<-<<<<-<<<<<........((((.((((((.((((..(((((....)))))..))))))))))))))........))}}}}}}}}}}}}}}}}=}}}.))).)))))))))))..))))))).)))..))))))))))	GGCAGTCTCCTTGGCTAACT(1)	-	21	190	-97.09	-51.1	0.009901
ptc-miR169n	TGAGCCAAGGATGACTTGCCG	73	63.48	scaffold_18	14341657	14341677	ATCTTGCATGAAGTGATAGAGAGTGGATTTGAGCCAAGGATGACTTGCCGCAGATGCATGGTCCTTGCTGCTGATCACATACCAAGGGGGGTTTTGGGTGGCAAGCATCCTTGGTTCTCCTTCGCTCTGTATTTCCTCATGCGAGAT(((((((((((.(.((((.((((((((..-<<<<<<<<<<<<-<<<<<<<(.((.((....((((((.((.((....)))).))))))..)).))..))))))))))))))))))))...)))))))).)))).).)))))))))))	NO	-	21	147	-73.5	-50	0.009901
ptc-miR169q	TAGCCAAGGACGACTTGCCTG	13	46.43	scaffold_1	27741721	27741741	GAGACCTAACATGAAAATAAGAGTCTTGTTAGTTAGCCAAGGACGACTTGCCTGTTCCTAGCAATTTGGGATTTGCCCTGGACTAAGAGGCAGGACCCTCATTCCGGGTTTCAGGCAGTCTCCTTGGCTAGGTTGACAGGCTCTTCTTTGTCATGCCAGGCCTT(((.(((..((((((((.((((((((.((((.(<<<<<<<<<<-<<<<-<<<<<..((..(.(((..(((.((((((((......)).)))))).)))..))))..))...)))))))))))))))))))).).))))))))))).))).)))))..))).)))	NO	+	21	164	-75.9	-46.2805	0.009901
ptc-miR169s	CAGCCAAGGATGACTTGCCGG	8	36.36	scaffold_18	3350295	3350315	TTGCCTTGGGGGCTTGCATGAAGAGGTAGAGAGTGTGATTCAGCCAAGGATGACTTGCCGGCAGCAGGTAAGAGCAAAGCTCCGTTTTTGGAAGTTCAAGGATATCTTAACTTTTCCGGCCGGCAAGCTGTCCTTGGCTACATTGTACTCTCTTCTTCTCATGCAAGAACTACTTGGTAA(((((...((..(((((((((.((((.((((((((..((.-<<<<<<<<<<--<<<<<<<<(....((.(((((..(((....((((((((....))))))))..)))..))))))).)))}}}}}}==}}}}}}}}}}==))..)))))))).)))))))))))))..))....)))))	GGCAAGCTGTCCTTGGCTAC(2)	-	21	180	-91	-50.5556	0.009901
ptc-miR169u	TAGCCAAGGACGACTAGCCTA	1762	95.6	scaffold_15	12079420	12079440	GGAAGAGAGGTCTTGTATGAAGATGAAGAGGTAGAGAGTTTGGTAGCCAAGGACGACTAGCCTATTTCCTCCATTGGGTTCTCAAAAGAATGAAATGTCGTTCAGAGCTCACTGGTAGGGTTCATAGGCAGTCTCCTTTGGCTATCCTAACTGGCTCTCATTTTTCATGCTAGACCTACATCTCTTCT(((((((((((((.((((((((((((.(((.(((..((...((<<<<<<<<<<-<<<<-<<<<<(.(((((((.((((((((.....((((((....)))))))))))))).))).))))...))}}}}}}}}}}}=}}}}}}}}}))..))).)))))).))))))))).)))))....))))))))	AGGCAGTCTCCTTTGGCTATC(2)	+	21	188	-89.4	-47.5532	0.009901
ptc-miR171a	TGATTGAGCCGTGCCAATATC	59	92.19	scaffold_4	764814	764834	GTTTCTTCAGAGAAAACGGGATATTGGTACGGTTCAATCAGAAAGTAATGCTCCCAAAAGTATAGAGTACTATTGTTTGATTGAGCCGTGCCAATATCACGTACACTCATCTTCCTCTCGAGGAAC(((((((.((((.(((((={{{{{{{{{{{{{{{{{{{{(((.((((.(((((...........))))).)))).))>>>>>>>>>>>>>>>>>>>>>.))).........)).)))).)))))))	GGATATTGGTACGGTTCAATC(17)	+	21	126	-54.3	-43.0952	0.009901
ptc-miR171b	TGATTGAGCCGTGCCAATATC	59	90.77	scaffold_21	325798	325818	GTCAACATAATTATATATAACGAGATATTGGTGCGGTTCAATCAGATAGTAATGCTCCATAAGCATAGAGCTCTATTGTTTGATTGAGCCGTGCCAATATCACGTATATGTTGC(.(((((((..........(((.((((((((..((((((((((((((((((..((((.((....)).))))..)))))))>>>>>>>>>>>-->>>>>>>>.))).))))))))	NO	+	21	114	-53.5	-46.9298	0.009901
ptc-miR171e	TGATTGAGCCGTGCCAATATC	59	93.65	scaffold_1	31797196	31797216	AATTTGATGTTGGCAGAGCTCAATCAAATCAAAGCACTCAATGGTTGGGTTCTTTCATCTGATTGAGCCGTGCCAATATCGCATT(((.(((((((((((..(((((((((.((.((((.(((((.....))))).)))).)).>>>>>>>>>-->>>>>>>>>>).)))	NO	-	21	85	-37.8	-44.4706	0.009901
ptc-miR171f	TGATTGAGCCGTGCCAATATC	59	89.39	scaffold_2	908913	908933	GTGCTTGAAAGTGTCATTGCGATGTTGGCCCGGTTCACTCAGAGAAAAGACACCATTTTTTTTCAAGAAGATCATCAAAGCTTGAAAGAATAATGGTGGTCGGTCGTCTCTGATTGAGCCGTGCCAATATCTTAGTGCTCTTTCATTTAT(((..((((((.(.(((((.(((((((((.(((((((.(((((((...(((((((((((((((((((..(.....)....)))))))))).)))))).))).....))))>>>->>>>>>>->>>>>>>>>.)))))).))))))..)))	NO	+	21	150	-67.5	-45	0.009901
ptc-miR171l	CGAGCCGAATCAATATCACTC	52	94.55	scaffold_15	654676	654696	GGAGAAGTAGACACGGTGTGATATTGGTCCGGCTCATCTTCTGTGCATAAGCATCTGAAGTTCTTCACTCATGAAGACGAGCCGAATCAATATCACTCTTGTATGCTTCTTC(((((((((.(((.((={{{{{{{{{{{={{{{{{==((((.((((....))))..)))).((((((....))))))->>>>>>->>>>>>>>>>>->)))).)))))))))	TGTGATATTGGTCCGGCTCAT(3)	+	21	112	-52.5	-46.875	0.009901
ptc-miR171m	CGAGCCGAATCAATATCACTC	52	94.55	scaffold_12	2197369	2197389	GGAGAAGCAGACATGGCGTGGTATTGATCCGGCTCATCTTCTGTATTTGCATCAGAAGTTCTTCGCTGAAGACGAGCCGAATCAATATCACTCTTGTACGCTTCATTC((((((((..(((.((.(((((((((((.((((((..((((((.........)))))).(((((...)))))->>>>>>->>>>>>>>>>>->))))..))))).)))	NO	-	21	108	-45.8	-42.4074	0.009901
ptc-miR171n	CGAGCCGAATCAATATCACTC	52	94.55	scaffold_12	2201537	2201557	TTGGAGAAGCAGACATGGCGTGGTATTGATCCGGCTCTTCTTCTGTATTTGCATCAGAAGTTTTTCGCTGAAGACGAGCCGAATCAATATCACTCTTGTACGCTTCATTCTCTAA((((((((((..(((.((.(((((((((((.((((((.(((((.((....((.......)).....)).)))))->>>>>>->>>>>>>>>>>->))))..)))....)))))))	NO	-	21	115	-45.2	-39.3043	0.009901
ptc-miR172b	AGAATCTTGATGATGCTGCAT	9265	98.82	scaffold_9	1730129	1730149	TCGTTGTTTGCGGGTGGAGCATCATCAAGATTCACATGCAAATGCACGGCCGGTGATGTTAAGAGTTAAATCTTTCTTTGTTTCTGTTCATCTGCCAAAGTTCTTTGGAAGTGAGAATCTTGATGATGCTGCATCGGCAATAAACGA(((((..((((.((({={{{{{{{{{{{{{{{{={{(.((((.((..(((.(((((.....((((.((((......)))).))))..))))).)))...))..))))...)))->>>>>>>>>>>>>>>>->>>).))))..)))))	GGAGCATCATCAAGATTCACA(1) GAGCATCATCAAGATTCACAT(1)	-	21	147	-60.6	-41.2245	0.009901
ptc-miR172c	AGAATCTTGATGATGCTGCAT	9265	98.83	scaffold_10	19900051	19900071	AGTCATTGTTTGCAGGTGCAGCATCATCAAGATTCACATTCAAACAGATGTACGGCAGCTAGCTAGCTAGATAGATAGACAGCAATGTATTTCTTTGAAGGTGAGAATCTTGATGATGCTGCATCAGCCATAAATGACT(((((((....((.((({{{{{{{{{{{{{{{{{{{{=(((((..(((.(((((...(((..(((.((....)).)))..)))..))))).)))))))).)))>-->>>>>>>>>>>>>>>>>>).))....)))))))	GCAGCATCATCAAGATTCACA(5) CAGCATCATCAAGATTCACAT(3)	-	21	139	-62.1	-44.6763	0.009901
ptc-miR172f	AGAATCTTGATGATGCTGCAT	9265	98.82	scaffold_4	21285315	21285335	GTCGTTGTTTGCGGGTGCTGCATCACCAAGATTCACATGCAAATGCATGGCCGATGATATATGTTAGAAATTTTTTTTATATAAAAAAGATATCTTTCTTTCTTTCTGATCATCTGCCAAAGTTCTTTGGAAGTGAGAATCTTGATGATGCTGCATCGGCAATAAACGAC((((((..((((.(((((.((((((.((((((((.(((.((((.((.((((.((((((....(..(((((((((((((....)))))))))....))))..)......)))))).))))..))..))))...)))->>>>>>>>->>>>>>->>>>).))))..))))))	NO	+	21	170	-64.2	-37.7647	0.009901
ptc-miR390a	TAAGCTCAGGAGGGATAGCGC	228	60.32	scaffold_1	27693960	27693980	TTGTACACACAAGTACGGGAGAATCTGTTAAGCTCAGGAGGGATAGCGCCATGAGCATGACAAAGTCTATGTTTGAGTTAATCTCAACAAAATCAATCCAGTCATCAGTGGCGCTATCTATCCTGAGTTCTATGGGTTCTCCTTACTATTCTGGTGCAG((((((.....((((.((((((((((((--<<<<<<<<<-<<<<<<<<<(((..(.(((((........((((.(((.....)))))))...........)))))).)))))))))))).)))))))))..))))))))))))))))......))))))	NO	+	21	159	-69.71	-43.8428	0.009901
ptc-miR390b	TAAGCTCAGGAGGGATAGCGC	228	60.32	scaffold_6	7867994	7868014	AGTATGGAAGAATCTGTTAAGCTCAGGAGGGATAGCGCCCTAAGGATAATCATGGGCTCTTTTTATGTGGTTTTTGATTCTCAGTGGCGCTATCCATCCTGAGTTTCATTGCTTCTTCTTGCT((((.(((((((.(.((-<<<<<<<<<<-<<<<<<<<<(((.((((...(((..(((((.......).))))..))))))).)).)))))))))).)))))))))).)).).)))))))))))	NO	+	21	123	-53.5	-43.4959	0.009901
ptc-miR390c	TAAGCTCAGGAGGGATAGCGC	228	60.32	scaffold_9	7516341	7516361	TGATATGTGCATAAGTATGGGAGGATCTGTTAAGCTCAGGAGGGATAGCGCCATGAGCTGATGATAAGTTGATGTTTGATGGGTTAATCTCAACATAATCAATCTAGTCATTAGTGGCGCTATCTATCCTGAGTTCTATAGGTTCTCCTTGCTATTCCGGTACAGTTTCA(((..(((((...((((.((((((((((((--<<<<<<<<<-<<<<<<<<<(....(((((((((.(((((((...((.((((.....)))).))..))))).)).))))))))))))))))))).)))))))))..))))))))))))))))......)))))...)))	NO	+	21	170	-80.6	-47.4118	0.009901
ptc-miR390d	TAAGCTCAGGAGGGATAGCGC	228	60.32	scaffold_16	12564444	12564464	TTGATATATAGAAGTATGGAAGAATCTGTTAAGCTCAGGAGGGATAGCGCCCTAAGGATAACCATGGGCTCTTTTTATTTGGTTTTTGACTATCAGTGGCGCTATCCATCCTGAGTTTTACTGGTTCTTCTTGCTACGATCAG(((((.....(.((((.(((((((((.((-<<<<<<<<<<-<<<<<<<<<(((...((((..((..((((..........))))..))..)))))).)))))))))).)))))))))).)).))))))))))))).).)))))	NO	+	21	143	-59.6	-41.6783	0.009901
ptc-miR393c	TCCAAAGGGATCGCATTGATCT	31	91.18	scaffold_15	13166766	13166787	TAGTGCAGCTGGAGTGTTCCAAAGGGATCGCATTGATCTAATGACTCTCGATGTCTAAATCATATTAATGTTTAGTTTTTTCGTTGGATCATGCGATCCCTTAGGAATTTTCCAGCATTCAGCTCTA(((.((.(((((((.((<<<-<<<<<<<<<<<<-<<<<<(((((.....((...(((((.(((....))))))))...)))))))))}}}}}}}}}}}}}}}=}}}}}.))))))).....)).)))	ATCATGCGATCCCTTAGGAAT(6)	+	22	127	-56.3	-44.3307	0.009901
ptc-miR394a	TTGGCATTCTGTCCACCTCC	1106	97.79	scaffold_2	831824	831843	TCATGTGGGTTTTGCAAAGGGTTTCTTACAGAGTTTTTTGGCATTCTGTCCACCTCCATCTGTAGAAACTACAAGTTGTTCTACTTTCTGGAGGTGGGCATACTGCCAACTGAGCTCTGTTGGTCTCTCTTTGTAAAACCCTCGTGA(((((.(((((((((((((((...((.(((((((((.<<<<<<-<-<<<<<<<<<<<(...((((((.(........)))))))....)))}}}}}}}}}=}=}}}}}}==))))))))).))...))))))))))))))).)))))	AGGTGGGCATACTGCCAACT(2)	-	20	147	-80.3	-54.6258	0.009901
ptc-miR394b	TTGGCATTCTGTCCACCTCC	1106	98.05	scaffold_5	24701313	24701332	TCATGTGGATTTAGCAAAGGGTTTCTTACAGAGTTTATTGGCATTCTGTCCACCTCCTATCTTTAGAAATTAGAATATCTCTTTCATATGGAGGTGGGCATACTGCCAACCGAGCTCTGTTGGTCTCTCTTTGTAAAACCCTCGTGA(((((.((.(((.((((((((...((.(((((((((.<<<<<<-<-<<<<<<<<<<<.......(((.((......)).))).......))))))))))).).))))))..))))))))).))...)))))))).))).)).)))))	NO	+	20	147	-63.74	-43.3605	0.009901
ptc-miR395b	CTGAAGTGTTTGGGGGAACTC	80	95.24	scaffold_6	7424478	7424498	TGCAATGGTGCATAGATCAAGTGTCCCCTAGAGTTCCCTTGAGCACTTCACTGGGACCCTTCAGACCGAAAGAGTATTATCTTTCCCACTGAAGTGTTTGGGGGAACTCCTGGTGTCATTTGATGTTAATAATTAGTTAATTGCA((((((...((..(.((((((((.(.((..(((((((((..(((((((((.(((((........(((....).))........)))))->>>>>>>>>-->>>>>>>>>..)).).)))))))).).........))..))))))	NO	+	21	145	-62.29	-42.9586	0.009901
ptc-miR395c	CTGAAGTGTTTGGGGGAACTC	80	95.24	scaffold_6	8406772	8406792	TAGCATAGATCAAGTGTCCCCTAGAGTTCCTCTGAGCACTTCATTGGGAATCTTCGATTAAATGAAAGAGTATTATCATTCCTACTGAAGTGTTTGGGGGAACTCCTGGTGTCATTTGATGTTA(((((....(((((((.(.((..(((((((((..(((((((((.((((((..((((......)))).((......)).))))))->>>>>>>>>-->>>>>>>>>..)).).))))))))))))	NO	+	21	124	-52.5	-42.3387	0.009901
ptc-miR395d	CTGAAGTGTTTGGGGGAACTC	80	95.24	scaffold_6	8410893	8410913	AGCATGCCATAGATCAAGTGTCCCCTAGAGTTCCTCTGAGCACTTCACTGGGAATTTCCGATCAAATGAAAGAGTATTATCATTCCTACTGAAGTGTTTGGGGGAACTCCTGGTGTCATTTGATGTTTACAAGCT(((.((....(.((((((((.(.((..(((((((((..(((((((((.(((((((......((........))........)))))))->>>>>>>>>-->>>>>>>>>..)).).)))))))).)...)).)))	NO	+	21	135	-56.04	-41.5111	0.009901
ptc-miR395e	CTGAAGTGTTTGGGGGAACTC	80	95.24	scaffold_16	13792287	13792307	GAAACGCAAAGAACGTTAGCTGTCCCCCGGAGTTTCCCTGACCACTTCACTGGGGCTATAATTCTACTCTTCGTGTTTAAGGGTAGAGGCAACCCTTCCTCACTGAAGTGTTTGGGGGAACTCTGGGTGGCATTTAACACTGTTTAGCTGTC((...(((((.(..(((((.((((.((((((({{{{{{=={={{{{{{{={{{((......((((((((((.......)))))))))).........)))))->>>>>>>->-->>>>>>>>>)))).)))).)))))..).))).))..))	TTTCCCTGACCACTTCACTGG(1)	-	21	152	-65.96	-43.3947	0.009901
ptc-miR395g	CTGAAGTGTTTGGGGGAACTC	80	95.24	scaffold_16	13793518	13793538	ATCAAGTGTCCCCTAGAGTTCCTCTGAGCACTTCATTGGGGATCTTCCATCGACCTGAAAGAGTATTATCATTCCTACTGAAGTGTTTGGGGGAACTCCTGGTGTCATTTGAT((((((((.(.((..(((((((((..(((((((((.((((((((((.((......)).)))).........))))))->>>>>>>>>-->>>>>>>>>..)).).))))))))	NO	+	21	113	-51.6	-45.6637	0.009901
ptc-miR395h	CTGAAGTGTTTGGGGGAACTC	80	95.24	scaffold_761	8244	8264	ATCAAGTGTCCCCTAGAGTTCCTCTGAGCACTTCATTGGGGATCTTCCATCGACCTGAAAGAGTATTATCATTCCTACTGAAGTGTTTGGGGGAACTCCTGGTGTCATTTGAT((((((((.(.((..(((((((((..(((((((((.((((((((((.((......)).)))).........))))))->>>>>>>>>-->>>>>>>>>..)).).))))))))	NO	+	21	113	-51.6	-45.6637	0.009901
ptc-miR395i	CTGAAGTGTTTGGGGGAACTC	80	95.24	scaffold_16	13797943	13797963	TTATTTTTTGTTTTCGTTAATTGTTGATAGCACAGATCAAGTGTCCCCTAGAGTTCCTCTGAGCACTTCAATGGGGATCTTCCATCGACCTGAAAGAGTATTATCATTCCTACTGAAGTGTTTGGGGGAACTCCTGGTGTCATTTGATGTTACAAGCTCAGAAAACACAGTAA(((((...(((((((.......(((..(((((....(((((((.(.((..(((((((((..(((((((((.((((((((((.((......)).)))).........))))))->>>>>>>>>-->>>>>>>>>..)).).))))))))))))..)))...))))))).)))))	NO	+	21	173	-61.4	-35.4913	0.009901
ptc-miR396a	TTCCACAGCTTTCTTGAACTG	979	64.41	scaffold_6	4636177	4636197	TCTTGGTATTCTTCCACAGCTTTCTTGAACTGCACCTATTTGAATATTGTTGTTGATGTTGCCGTGCATGTACATATGACATTGTATTTTTGTTGCGGTTCAATAAAGCTGTGGGAAGATACAAACAGGA(((((((((..<<<<<<<<<<<<-<<<<<<<<((...((..((((((...((((((((((((...)))...)))).)))))..))))))..))))}}}}}}}}=}}}}}}}}}}}}..))))...)))))	CGGTTCAATAAAGCTGTGGGA(8) GGTTCAATAAAGCTGTGGGAA(1) GTTCAATAAAGCTGTGGGAAG(454) GTTCAATAAAGCTGTGGGAA(4) TTCAATAAAGCTGTGGGAAGA(51) TTCAATAAAGCTGTGGGAAG(102)	+	21	130	-49.6	-38.1538	0.009901
ptc-miR396b	TTCCACAGCTTTCTTGAACTG	979	64.41	scaffold_18	13217005	13217025	GGTGTGGTTGTACGTGACCCTCTTTGTATTCTTCCACAGCTTTCTTGAACTGCACCTATTAGATTAATGTTGATGTTGTTGTGCGATATGCCATGACCATATGACATTGTATTCATTTTTGCTGCGGTTCAATAAAGCTGTGGGAAGATACAAACAGGATCAAAGAAAGTTGCTATGTC((..((((...((.(((.(((.(((((((..<<<<<<<<<<<<-<<<<<<<<((.(.....((.(((((((.((((.((..((.(.....)))..)).)))))))))))...))......).))}}}}}}}}=}}}}}}}}}}}}..))))))).))).)))......)).))))..))	CGGTTCAATAAAGCTGTGGGA(8) GGTTCAATAAAGCTGTGGGAA(1) GTTCAATAAAGCTGTGGGAAG(454) GTTCAATAAAGCTGTGGGAA(4) TTCAATAAAGCTGTGGGAAGA(51) TTCAATAAAGCTGTGGGAAG(102)	+	21	179	-65.4	-36.5363	0.009901
ptc-miR396f	TTTCCACGGCTTTCTTGAACT	251	65.03	scaffold_6	25199498	25199518	GCACGGCTTGTAGATATATATGGGTCTCTTGGTGATTTTCCACGGCTTTCTTGAACTGTATATATTATCAATGGCTTTTTACAAGACTGGAAGATGGTTTCCATGGAGAAGAATTGTCACAAAAACAGTTCAAGAAAGCCCTGAAAAATTATTTAGAGGATCTAGTTTATATATGTCTATACAATGGCTGGC((.((((((((((((((((((((((((((..(((((<<<-<<-<<<<<<<<<<<<<<((.........((((..((((((.((....((((((....)))))))))))))).))))........)))))))))))))))).)).))))))))..))).))))).....)))))))))))))....)))))))	NO	-	21	192	-70.23	-36.5781	0.009901
ptc-miR396g	TTCCACGGCTTTCTTGAACTT	557	54.34	scaffold_7	6411771	6411791	GAGAAGAAACTAAGGTCGTTGCATGCTTTTCCACGGCTTTCTTGAACTTGGCACTCAAGAGACATGAGAGTAAAGGGCTAGGCTTTCTTTTCTATTCCTTTCGTTCTTTGAAATTTTCCTGTTCAAAGAATCCATACATATCAGTCTCTTTAGTACAAAGCTCAAGAAAGCCGTGGGAAAATATGAAAGGATTTTGTGGTGTAATCTT((((....((((.((((.((.((((.((<<<<<<<<<<<<<<<<<-<<<.(.(((.(((((((.(((....(((((..((((........))))..))))).((((((((((.........)))))))))).........)))))))))).))).).}}}=}}}}}}}}}}}}}}}}})).)))).)).))…	AAGCTCAAGAAAGCCGTGGGA(9) GCTCAAGAAAGCCGTGGGAAA(6) CTCAAGAAAGCCGTGGGAAAA(73) CTCAAGAAAGCCGTGGGAAA(57)	-	21	208	-75	-36.0577	0.009901
ptc-miR397a	TCATTGAGTGCAGCGTTGATG	272	93.47	scaffold_11	4146740	4146760	GTGGAGGCTTCCTGGATTGGAGAACCATCATTGAGTGCAGCGTTGATGAAATCCTCCATTTTGTGCTATTAAACTGTTACCAACCCTTTATGGGGCATGGCATCATTTCACCAGCGCTGCATTCAATCATGTTTTTCTAACTCTTCCGGGCATGGTTTTGC(..(((.(..((((((((((((((.((<-<<<<<<<<<<<<<<<<-<<((((...((((...((........)).........(((.....)))..))))....))))))=}}}}}}}}}}}}}}}}=}}}.))))))))....))))))...).)))..)	CCAGCGCTGCATTCAATCATG(1)	+	21	161	-60.6	-37.6398	0.009901
ptc-miR399f	TGCCAAAGGAGAATTGCCCTG	19	100	scaffold_4	4599727	4599747	GATGGAGCTAGGCAATACATTTATCATTTATGGCTAAAGAATAACAGGGCTTTATCCTCCTTTGGCAAACAGAACATGGAAATAAATGCCTGCATATTTCTGTTTTGCCAAAGGAGAATTGCCCTGCCATTCGATTCCACAGTTACTTGAATGTGTCTATTGCTCTTC((.((((((((((...(((((((....((.(((.....((((..((((((...((.((((((((((((((((((.((....))..(((....)))..))))).))>>>>>>>>>>>->>->>>>>>..))))....))).)).....))))))))))))..)))))))	NO	+	21	168	-57.9	-34.4643	0.009901
ptc-miR399g	TGCCAAAGGAGAATTGCCCTG	19	100	scaffold_4	4640170	4640190	GAGTAGTGATGAATAACTGTGCAATTCTCCTTTGGCAGACGTATATGGCGTTCGGACACCAACTTTGGACTGCCAAAGGAGAATTGCCCTGCCATTCAACTACACTGCC(.((((((.(((((..(.{={{{{{{{{{{{{{{{{{{=((....(((.((....)).)))....))..)>>>>>>>>>>>>>>>>>->->..)))))....)))))))	GTGCAATTCTCCTTTGGCAGA(1)	-	21	109	-46.4	-42.5688	0.009901
ptc-miR403a	TTAGATTCACGCACAAACTCG	152	86.86	scaffold_1419	5251	5271	GGAAGAGGCATATTTCAGGTTTGTGCATGAATCTAATATAGCTAAAAAAATCCCATCAAACACAAATTAAAATACTAGATAGCAATCAGCACTAGTTTAGTATAGTATTAGATTCACGCACAAACTCGTAATCTGTCTTTTTC((((((((((.(((.(..((((((((.((((((((((((.(((((............................(((((...((.....)).))))))))))...)))>>>>>>>>>->>>>>>>>-->.))).))))))))))	NO	-	21	143	-43.78	-30.6154	0.009901
ptc-miR403a	TTAGATTCACGCACAAACTCG	152	86.86	scaffold_2	15394890	15394910	GGAAGAGGCATATTTCAGGTTTGTGCATGAATCTAATATAGCTAAAAAAATCCCATCAAACACAAATTAAAATACTAGATAGCAATCAGCACTAGTTTAGTATAGTATTAGATTCACGCACAAACTCGTAATCTGTCTTTTTC((((((((((.(((.(..((((((((.((((((((((((.(((((............................(((((...((.....)).))))))))))...)))>>>>>>>>>->>>>>>>>-->.))).))))))))))	NO	+	21	143	-43.78	-30.6154	0.009901
ptc-miR403b	TTAGATTCACGCACAAACTCG	152	89.41	scaffold_10	14828063	14828083	AGAGGACTCATATCTCTAGTTTGTTCGTGGATCTGACGCCATCACAACCGTTCATTTCACGACCATCCAATGGCGTTAGATTCACGCACAAACTCGCGATCTGTCTCCTCT((((((..((.(((.(.(((((((.(((((((((((((((((......(((.......)))........))))))>>>>>>>>>>>->>>>>>>->.))).))..))))))	NO	-	21	111	-49.24	-44.3604	0.009901
ptc-miR472a	TTTTCCCTACTCCACCCATCCC	140	93.96	scaffold_5	119685	119706	AGTTAACACATATGGGAGGAATGGAGAGGGAGTAGGATTTTCGGAAGGTTATCGGGTGGGTGAGCGGGGAAGATAACTTTGGTTTTTGAGATAGTACTTGTTATTTTCCCTACTCCACCCATCCCATAGGTTTCCGATCATTCCTCCCTCTCCTCATCACTCTGCTTCTCATGGCCTGTTTATCT((..((((..(((((((((...((((((((((..((((..(((((((.((((.(((((((((((..(((((((((((...(((.((......)).))).))))>>>>>>>-->>->>>>>>>>>-)))).)))))))..))))))))))))))...........)))))))))...))))...))	NO	+	22	185	-83.94	-45.373	0.009901
ptc-miR827	TTAGATGACCATCAACGAAAA	122	97.6	scaffold_7	120963	120983	TTGCAACCATGAATATATTTGTTGATAGTCATCTAGTGAACATTGAAAGTCATATTAGATGACCATCAACGAAAACATTCATGATATTGCAA((((((.(((((((.(.{{{{{{{{{={{{{{{{{{{{.((.......))..))>>>>>>>>>->>>>>>>>>->.)))))))...))))))	TTTGTTGATAGTCATCTAGTG(1)	+	21	92	-33.9	-36.8478	0.009901
ptc-miRX1	TAGAGCAGATTGTAAGGGAAG	41612	96.51	scaffold_1	5198875	5198895	TGAAATCCAAGTGGACTTCCCTTACAATCTACTCTTTCAGTTTCACAGAAGATCCAGATTAGATTTTAAGGCAAACAAATTGATAGAGCAGATTGTAAGGGAAGCCCACATGGATTTCA(((((((((.((((.(({{{{{{{{{{{{{={{{{={{(((((..(..((((((.......))))))..)......)))))))->>>>->>>>>>>>>>>>>>>.)))).)))))))))	TCCCTTACAATCTACTCTTTC(3)	-	21	119	-56.8	-47.7311	0.009901
ptc-miRX105	TGACCTTGTGGAGCCGGCGTT	6	35.29	scaffold_2046	988	1008	GGGAGATGCTGTGTGACCTTGTGGAGCCGGCGTTGATGGAGATCGGTCTGTCCGTTGACCCGGAGGGAAGTGGGGGGTCGGTTGAGAGAGACCCGGCTGTGGGTTACTGCTGCTGCTGCC((.((..((.(((<<<<<<---<-<<<<<<-<<<......(((((..((.((((((..((....))..))))))))..)))))......))))))))).)))))))).)).))..)).))	NO	-	21	120	-46.6	-38.8333	0.09901
ptc-miRX111	TCGAATTTGGGCTTGAGATTG	966	91.91	scaffold_3	9383355	9383375	TGCAGAGTAGAAGTCGAGCTCAAGCACAAATTCGATCTTGCTTAACAAGGTACCGGCAAAGTCAGATCGAATTTGGGCTTGAGATTGTCTTCTTCGTTGCA(((((...(((((={{{={{{{{{{={{{{{{{{((((.((((.....(....)....)))).)))>>>>>>>>>->>>>>>>->>>.)))))...)))))	TCGAGCTCAAGCACAAATTCG(1) AGCTCAAGCACAAATTCGATC(17)	+	21	101	-45.9	-45.4455	0.009901
ptc-miRX112	TGATATGTGGCATTCAATCGA	95	84.07	scaffold_3	14915843	14915863	GATATCTCATTCATATATCATTTATTCCAGCATTCTTGATTGAATGCCACATATCATTCATTCCTGCTTTTTATATGAAAAGTCGGAATGAATGATATGTGGCATTCAATCGAGAATGCTGGAATAAATGATATCTGAACAATTGATC(((......((((.((((((((((((((((((((((((((((((((((((((((((((((((((.(((((((....))))))).))))))))>>>>>>>>>>>>>>>>>>>>>))))))))))))))))))))).))))......)))	NO	+	21	148	-93.7	-63.3108	0.009901
ptc-miRX119	TGGATGATCATGTTGGCAACC	22	70.97	scaffold_4	6132778	6132798	CATTGTAGGACATTCGTCGGCAACCATTTAGTCATGTTTGCTAACATGACCGTCCAAGTTATCAATTATGTCAGGTTACATTAAGGAAGCTGGCATGAGCATGCCATCAAAGTTGTTGACATGTTTGTCATCTTGGATGATCATGTTGGCAACCATGTTGATGTGGTAGATCATGTGCTGCGTATG((((((((.((((..(((....(((((((((.((((.{{{{{{{{{{{{={{{{{{{{....(((.(((((((....(((.....((...((((((....)))))))).....)))))))))).)))....))>>>>>>->>>>>>>>>>>>->))))))).))))).))).)))).))))).)))	TTGCTAACATGACCGTCCAAG(8)	+	21	186	-71.4	-38.3871	0.009901
ptc-miRX12	TCCATGGAAGATAATGACTCG	24	92.31	scaffold_1	20468231	20468251	GGACCCATGCATGGCGAACAAGTTGAGCTGTAGGGTTATGATGAACATGCTAATTACAAGCTATTGTCTTCCATGGAATAGGCAGTGATGGCATTTGTTTTATTTTCCTGAGGTGGAGAAAAACAAATAGACCATAACACTGTTATTCCATGGAAGATAATGACTCGTGGTTGACACTTGATCTCTCCAGTCCAGTTCAGATTCAAGCTAGCTGCTGTCT((((....((.((((.......((((((((...((....(((.((..((.(((((((.((.((((((((((((((((((((.(((((((((((((((((((..(((((......)))))))))))))).).))))..)))))))))>>>>>>>>>>>>>>>>->>->)))))).)).))…	NO	-	21	220	-82.82	-37.6455	0.009901
ptc-miRX120	TGATTGCTTGTTGGATATTAT	7	58.33	scaffold_4	6850872	6850892	AGATGATATTTTTTTATTTTGAAAATTATGATTGCTTGTTGGATATTATACATATTATATAATATGTATAATATCCAACAAGCAATCATAATTTCTTGCAAAGCGATGAGAATTCACT((.(((.(((((((..(((((.((((((<<<<<<<<<<<<<<<<<<<<<(((((((....))))))))))))))))))))))))))))))))))....)))))..).)))))))))))	NO	+	21	118	-51.7	-43.8136	0.009901
ptc-miRX121	TTAAAGCAGGGGGTCTAGTAGT	8	47.06	scaffold_4	8528118	8528139	AAGGCTCTTTAACTTTATTAAAGCAGGGGGTCTAGTAGTTTAACTATTTAGAAGATAGATTTTAAATAAGGCTCTTTAACTTATGATATATTTAAAAGCTATCTTCTAACTAGTTAAACTACCAGACCCCTGCTTTAATATAAAGTAATAATCACCCTT((((....(((((((((<<<<<<<<<<<<-<<<-<<<<<(((((((.(((((((((((.(((((((((...(............)...))))))))).))))))))))).)))))))))))).))))))))))))))..)))))))..)))....))))	NO	+	22	159	-64.2	-40.3774	0.009901
ptc-miRX123	TCTGGTATGAGCATTTGATGA	134	93.71	scaffold_4	11447563	11447583	GGTGCATATATATACATGAATGTGCCTCATGTCTGGTATGAGCATTTGATGATTGATAATTTCAATTTGTTTACATCTTTTTTCTGCAATCCTAATACCGCGTACTTTCAAATGTAAAGAAATTGAAATTATCAATCATCAAATGTTCGTACCATACGTAAGGCACACTCGTATGTATAATTGTATT((((((..((((((.((((.(((((((.(((<-<<<<<<<<<<<<<<<<<<<((((((((((((((((.(((((((........(((............))).........))))))).))))))))))))))))))))))))))))))))))).)))).))))))).)))).))))))..))))))	NO	+	21	187	-85.83	-45.8984	0.009901
ptc-miRX126	ATAAGCTGTCGAGCGTTTTGT	14	66.67	scaffold_4	16387964	16387984	TCTTCAGATGATTCTCAATGATAAGCTGTCGAGCGTTTTGTCTCAAGCTGCAAATGACAAAACGCTCGACAGCTTATCATTGAGAACCATGCTGTACGGA(((.((((((.(((((((((<<<<<<<<<<<<<<<<<<<<<(.............))))))))))))))))))))))))))))))).))).)))...)))	NO	+	21	100	-59.72	-59.72	0.009901
ptc-miRX128	TTGTACACAGAATAGGTGAAAT	278	96.86	scaffold_5	1237722	1237743	CTTGGTTACTGATATTATTTTGAACCGTCATGTCAATTATTGGTTATATATCGACTGAAAATGAAAGCTATTTCACTATTCTGTGCACACAATGCTTGAAACATTAATCATGGTTTTTGAAAGTATTGGAGCATTGTACACAGAATAGGTGAAATAACTTTCATTTTCATTCGATACGCAACTAAAATTGTAAATATAGTTCAGTCTCATCTTGGAAGCCAAG(((((((.(..(.......((((((..(.....(((((.((((((.(.((((((.((((((((((((.(((((((((((((((((...(((((((((.((((.....(((.......)))..)).)).)))))>>>>->>>>>>>>>->>>>>>>).)))))))))))).))))))…	NO	+	22	223	-76.94	-34.5022	0.009901
ptc-miRX13	TCCATGGAAGATAATGACTCG	24	92.31	scaffold_1	20471501	20471521	GGACTCATGCATGGCGAACAAGTTGAGCTGTAGGGTTATGATGAACATGCTAATTACAAGCTATTGTCTTCCATGGAATAGGCAGTGATGGCATTTGTTTTATTTTCCTGAGGTGGAGAAAAACAAGGAGACCATAACACTGTTATTCCATGGAAGATAATGACTCGTGGTTGACACTTGATCTCTCCAGTCCAGTTCAGATTCAAGCTAGCTGCTGTCT((((....((.((((.......((((((((...((....(((.((..((.(((((((.((.((((((((((((((((((((.((((((((((.((((((((..(((((......)))))))))))))..).))))..)))))))))>>>>>>>>>>>>>>>>->>->)))))).)).))…	NO	-	21	220	-82.02	-37.2818	0.009901
ptc-miRX134	TGGCAGAAAAGGATTCGTTTA	28	68.29	scaffold_5	22463579	22463599	GGTATAGGCCGAGTAGTATTCCAAAGAAGCTTCAGATAATAGCACGTTGCATACTGAGCATCAGAAGCAATTTACTCTTGATCCCAGTTCACGAATCCTCTTTTGCCAGATTCACGCCACTAAAGATTCATTGGGACATGAATGTGGCAGAAAAGGATTCGTTTATTGAGATAAGCTTAGAGTAATTTTCTATGGCACTGGCGCGACGCACTCTTAAGCAAGCCACTTTCAGCATACTACTCTTCCAATGCC(((((.((..(((((((((.(.((((..((((....(((.((..((((((.((.((..(((.(((((....(((((((..(((.((((..(((((((((.((((((((.(((((.(((.(............))).).))))).>>>…	NO	-	21	252	-83.4	-33.0952	0.009901
ptc-miRX136	TTAGTTTGGCAGCCTCTTCTC	60	90.91	scaffold_5	24262398	24262418	AATGAGAGAAGAGTCGAGCAAAACTAAAAGAGGAAACTAATCTATCTCCCTGCAAAATGCTGCCAAGCAACATCGTCTAGATCTTAAATATAAGATCAAGCCGAAGTTGGTTTGCTGCACTTTGCTGGGAGATTAGATTAGTTTCCTCTTTTAGTTTGGCAGCCTCTTCTCTTATT(((((((((((((.(..((.((((((((((((((((((((((((((((((.(((((.(((.((.((.((((.(((.((.(((((((....))))))).)).))).)))).)).)).))).))))).)))))).)))))))))))))))))>>>>>>>->>->->>>>>>>>)))))	NO	+	21	176	-98.5	-55.9659	0.009901
ptc-miRX138	AAGGGACAAAAATGGCATAAGA	9	69.23	scaffold_5	24280125	24280146	ATGGATGCGACCGGCAAGGGACAAAAATGGCATAAGAGAGATGTACAGGGGTAGGGAAGGGGAAGAGAAAGATCGATATCTACGCCCCTTCTTTTTCTCTTATGCATTTTTGTCCCTCGCCAGTCTCGCCCAT((((.((.(((.(((-<<<<<<<<<<<<<-<<<<<<<((((..(((....))).((((((((...(((.(......).)))...)))))))).)))))))))))))))))))))))).))).))).)).))))	NO	+	22	133	-64.6	-48.5714	0.009901
ptc-miRX14	TCCATGGAAGATAATGACTCG	24	92.31	scaffold_1	20476200	20476220	GGACTCATGCATGGCGAACAAGTTGAGCTGTAGGGTTATGATGAACATGCTAATTACAAGCTATTGTCTTCCATGGAATAGGCAGTGATGGCATTTGTTTTATTTTCCTGAGGTGGAGAAAAACAAGGAGACCATAACACTGTTATTCCATGGAAGATAATGACTCGTGGTTGACACTTGATCTCTCCAGTCCAGTTCAGATTCAAGCTAGCTGCTGTCT((((....((.((((.......((((((((...((....(((.((..((.(((((((.((.((((((((((((((((((((.((((((((((.((((((((..(((((......)))))))))))))..).))))..)))))))))>>>>>>>>>>>>>>>>->>->)))))).)).))…	NO	-	21	220	-82.02	-37.2818	0.009901
ptc-miRX142	CTCTGATATCATATTAAAAAA	6	85.71	scaffold_6	19553283	19553303	TTCATGATTGTTTGGTTATTGAAGCTCTGATATCATATTAAAAAATTATCTTGATCTAAAATCAATTAAGCTTTTAAGTTTTTAAGTTGAGATGGTTTTTTGACATGATATCAGAGTTTGTTGACCAAGTAATTAGAA(((.((((((((((((((...(((<<<<<<<<<<<<-<<<<<<<<((((((..(..(((((....((((....))))..)))))..)..)))))))))))))).)))))))))))))))..)))))))))))))))))	NO	-	21	138	-52.8	-38.2609	0.009901
ptc-miRX143	TTTGGGATCATCAGGACAGCC	30	56.6	scaffold_6	21307806	21307826	ATCTTTTAGCATTTTCCAAGCAAATTGAATTTGTATCTTTGGGATCATCAGGACAGCCCCTGCATCGAGAATTATGCAGAACTCTACTGAAATGAAACGGGGAAAAAAAAATTATTTCAACCTTTGCCACAACTGACGCAGGGGCTGCCCCGATAATTCCAAAGATCCAGTGCAATCTGCTTGTTAAATTGCTACTGGAT((((..((((((((..((((((.((((...(((.(((<<<<<<<<-<<<-<<-<<<<<(((((.((.((......(((((.......((((((((................))))))))...))))).....)))).)))))))))).)).))).))))))))))).)))..)))).))))))..))).)))))..))))	NO	+	21	200	-74.09	-37.045	0.009901
ptc-miRX144	TGAAGAGGTAGAGAGTGTAATT	10	41.67	scaffold_6	26618417	26618438	GCCTTGGGGGCTTACATGAAGAGGTAGAGAGTGTAATTCAGCCAAGGATGACTTGCCGGCAGCACGGGATCTCAGAGCTTAATAACTAGAAGATCAAGGCTGTCATTACTTTTCCGGCCGGCAAGTTGCCCTTGGCTACATTGTACTCTCTTCTTCTCATGTAAGGCCTACTTGGC(((...(((.((((((<<<-<<<<-<<<<<<<<<<<<-.((((((((..((((((((((((((.(..(((((...((........))...)))))..))))...............)))))))))))..))))))))..)}}}}}}}}}}}=}}}}}}}}})))).)))....)))	TTGTACTCTCTTCTTCTCATG(1)	+	22	176	-86.76	-49.2955	0.009901
ptc-miRX145	TAGTGAATTCTAGGTCTCAATC	11	91.67	scaffold_7	4183917	4183938	AGCCTAGTGAATTCTAGGTCTCAATCCTTTTCATTCAATCCTTTTAATCTATTCTACATCAATTGATATTGGTCCAACATCTGTTGGTATCACAGTTTGACTTGATTTAAATCCTAAACAACCATAAAAAGAAGAAGCCTGTTCTAAGTTTATGGGTCAAGGTTTAAGATGTTGTTTAGTGTTTGAATTGAGGTTAAGCTATGATATTAATTGATGCAGCACCAATATCAATTGATGTAAAACCGGCAAAAGGAGTTAAGAGAAAGGATAGAGAACCTAGAATCTACTAGGCT((((<<<<<-<<<<<<<<<<<<-<<<(((((..((...(((((((..((..((.(((((((((((((((((((.(..((((.((((((((((.(((((((((((((…	NO	+	22	293	-123.6	-42.1843	0.009901
ptc-miRX146	GTTGAGATGGCCGAGTTGGT	53	35.57	scaffold_7	4940817	4940836	GAAACAACAACGAGTTGAGATGGCCGAGTTGGTCTAAGGCGCCAGATTAAGGTTCTGGTCCGAAAGGGCGTGGGTTCAAATCCCACTCTCAACAAATCCAATTTTTTTAATATTATACTTGCAAGTCTTAGCCCTTATGTTCAGTTTC(((((((((..(.<<<<<<<<---<<<<<<<<<....((.((((((.......))))))))....(((.(((((.......))))).))).....................)))).)))))...)))))))).)...))))..)))))	NO	-	20	148	-39.4	-26.6216	0.039604
ptc-miRX15	TCCATGGAAGATAATGACTCG	24	92.31	scaffold_1	20479454	20479474	GGACTCATGCATGGCGAACAAGTTGAGCTGTAGGGTTATGATGAACATGCTAATTACAAGCTATTGTCTTCCATGGAATAGGCAGTGATGGCATTTGTTTTATTTTCCTGAGGTGGAGAAAAACAAGGAGACCATAACACTGTTATTCCATGGAAGATAATGACTCGTGGTTGACACTTGATCTCTCCAGTCCAGTTCAGATTCAAGCTAGCTGCTGTCT((((....((.((((.......((((((((...((....(((.((..((.(((((((.((.((((((((((((((((((((.((((((((((.((((((((..(((((......)))))))))))))..).))))..)))))))))>>>>>>>>>>>>>>>>->>->)))))).)).))…	NO	-	21	220	-82.02	-37.2818	0.009901
ptc-miRX150	TCTTGAGAAGTAAAGAACGAC	13	56.52	scaffold_8	6251425	6251445	CTTGTAAATGCTCTTATCTATTCGGTGGTCTTGAGAAGTAAAGAACGACGATAGAGAAATGTTGTTTTGCAAGTAATTAAATAGAGAAGCCGCATGTTAATTTTAAAATGAAAATGAATGGCTTTTAGTGTGATAATATGGATGCCTATCTAAATCCTCATACTTGAAACAAGAGGGCTTGCATGAAATTAACCTCGTCGTTCTTTACTTCTCAAGACCACCGCATAGATAAGAGCATTATTTCCATACTACCTTCTTAAATTTCCATACAAG(((((((((((((((((((((.((((((<<<<<<<<<<<<<<<<<<<<<((.........(((....(((((((..((......(((((((.(((....(((....)))....)))...)))))))…	NO	+	21	273	-104.52	-38.2857	0.009901
ptc-miRX154	TGAACAGTAGACGTGAATTAT	46	80.7	scaffold_8	15318231	15318251	CCCTTTCTTCTTCTTCGTTGTCTACTGAGTGAACAGTAGACGTGAATTATAGTTAACGTCCTACTATTCACACATGGGCGTGAATTATAATTCACGTTCACTGTTCATGCAGTGAATATTGGG(((...............(((.(((((.(<<<<<<<<--<<<<<<<<<<<((((.((((((..............)))))).)))))))))))))))..))))))))).))))).)))..)))	NO	+	21	123	-50.24	-40.8455	0.009901
ptc-miRX156	TTGTCTTCCATGGAATAGGCAG	19	61.29	scaffold_8	16262404	16262425	CTGAGAATTGGACTCATGCATGGCGAACAAGTTGAGCTGTAGGGTTATGATGAACATGCTAATTACAAGCCATTGTCTTCCATGGAATAGGCAGTGATGGCATTTGTTTTATTTTCCTGAGTTGGAGAAAAACAAATAGACCATAACACTGTTATTCCTTGGAAGATAATGACTCGTGGTTGACACTTGATCTCTCCAGTCCAGTTCAGATTCAAGCTAGCTGCTGTCTGTAAATTCTTTG(.(((((((((((....((.((((.......((((((((...((....(((.((..((.(((((((.((.((<<<<<<<<<<-<<<<<<<-<<<((((((((((((((((..(((((......)))))))))))))).).))))..))))))))))))…	NO	+	22	241	-85.82	-35.61	0.009901
ptc-miRX16	GTGGAGACATGGAAGTGAAGA	8	38.1	scaffold_1	22403658	22403678	TTTTTTCTTCTTCTTCTGCACTTCCATGTCTCCACTGTTCACGTGAACAGTGGAGACATGGAAGTGAAGAAGAAGGAGAATGAG(((.(((((((((((((.((((((((((((((((((((((....)))))>>>>>>>>>>>>>>>>>->>>)))))))))).)))	NO	-	21	84	-61.2	-72.8571	0.009901
ptc-miRX161	TTGCTGAAACGATTGAACTAT	238	94.44	scaffold_9	10835061	10835081	CTCGCAACCTCTGTCTCGGAACAATAGTTCAATCTTTTCAGCAACCTTAAATAGTGGGCTATTTAAGGTTGCTGAAACGATTGAACTATTGTGACTTGTGAG(((((((.....(((.....((((((((((((((.(((((((((((((((((((....))))))))))>>>>>>>>>->>>>>>>>>>>)))))))))))))	NO	+	21	102	-55.1	-54.0196	0.009901
ptc-miRX163	TCACGGACGGCGGCTCCAAGCA	8	26.67	scaffold_103	37214	37235	GTGGAGGTGCTGGTGCTGCTGGAGGCTGCTGGCGGTGTCTTGGCTCACGGACGGCGGCTCCAAGCAGCGGCGGCGGTGCTAC((((.(.(((((.(((((((((((.((((((.(.(((.......->>>->->>>>>>>>>>->>>>))).))))).).))))	NO	+	22	82	-45.7	-55.7317	0.019802
ptc-miRX20	TAGTAGAAATGCATTGACTAG	6	100	scaffold_1	24231017	24231037	ATAACTTCATTATAGATAGTTAACTCATCACCAGTCAATGCATCACTGCTAGCACATGCAAGCTTTCAGTTGACATTTCCTGTTATATAAAGAATTCCTCAGAAGAAAAGCTAGTAGAAATGCATTGACTAGTGATGAGTTAATTTCAGTTGATTTGCTGTTAT(((((..((...(((..((((((((((((((.(((((((((((..((((((((.........((((....(((((.....)))))...))))..(((....))).....))>>>>>>-->>>>>>>>>>>->)))))))))))))....)))...))..)))))	NO	-	21	164	-55.7	-33.9634	0.009901
ptc-miRX22	TGATGATTAATTGACTGCAAA	12	85.71	scaffold_1	34025520	34025540	CCAATCTTAGCTTCTTGTTGTTTAGCTTGATGATTAATTGACTGCAAAAGCAACTCTCTTCTTTTTTTAGGAGAGGAGTTGCCTTTGCAGTCAAGTAATCATCAAGCTAAATACCATAACTGAGGACTGAGGTAGAAGG((.(((((((((((.((.(((((((((<<<<<<<<<-<<<<<<<<<<<.(((((((((((((......)))))).))))))).}}}}}}}}}}}=}}}}}}}}}))))))))).)).....)))).)))))))....))	TTTGCAGTCAAGTAATCATCA(1) TGCAGTCAAGTAATCATCAAG(1)	+	21	139	-72.2	-51.9424	0.009901
ptc-miRX26	TTATGTGGCATAAAAGAATCAA	5	62.5	scaffold_1	47209839	47209860	GATTTTGATTCTTTTATGTGGCATAAAAGAATCAAAATCGAGTTGGAATCTACCAATTTGATTTTGATTCTTTTATGCCCATAATAAAATCAACGGTC((((((((((...<<<<<-<<<<<<<<<<<<<<<<(((((((((((......))))))))))))))))))))))))))))))))...)))))).))))	NO	-	22	98	-48.5	-49.4898	0.009901
ptc-miRX28	CGGCTCTAGAGAAAAAGATGG	5	83.33	scaffold_10	11331575	11331595	GGCGGCGGCTCTAGAGAAAAAGATGGGTTTAGGGTTAGGTATTTTTTGTATTTTTTTTTTGATGTTGTCAAAATTCCCCCCCCTCTTTTGTTTGAGTTGTGGACC(((.(<<<<<<-<<<--<<<<<<-<<(....(((..((((((.....))))))...(((((((...)))))))..))).))).)))))).)))))))))).).))	NO	+	21	105	-28.2	-26.8571	0.089109
ptc-miRX3	TGTGATAATGAAGGCTATGGT	17	100	scaffold_1	5942036	5942056	GTATAATGCCAACCATAGCCTCCATTATCACACTATTTTGTTTGGTATTTTACCAAACAAAATGGTGTGATAATGAAGGCTATGGTTGGCATTATTGC(((((((((((((((((((((.(((((((((((((((((((((((((...)))))))))))))))>>>>>>>>>>->>>>>>>>>>)))))))).)))	NO	+	21	98	-69	-70.4082	0.009901
ptc-miRX30	GATGGAGGACGAGGAAGTTTCT	32	35.56	scaffold_10	12814800	12814821	AGAAGAGGGGAAAGAGATGGAGGACGAGGAAGTTTCTGGACATGGGTTGGTTTGCAAGAAAATAAGATTTTTGAACTCTCTGATATTGTTCATGGAAAACAGTTTTCTTGCCGACCCCACCCATGCCAATGATTTCCTCAGCTTCCTCTCTCTCCCTGTTTCCTTCT(((((.(((((.(((<<-<<<<<--<<<<<<<<<--<((.(((((((.((((.((((((((((....((..(((((...........)))))..)).....)))))))))).))))..))))))))))..)))))))))..)))))))))).))))).....)))))	NO	-	22	167	-76.7	-45.9281	0.009901
ptc-miRX31	CTATGTATGCTTGACCAATCA	5	100	scaffold_10	15332776	15332796	GGAGGAAAAAATGTTTCATAGACTCGGTCTATGTATGCTTGACCAATCAAGTTAGTCAGTGCAATTGATCCACCATCAGAGTTGGTTAATGCAGGGCTTACATGATTTGATTGGTCTGGTTTACATAGACTAAGTCTATGCCACAGTTGAACTTGC(.(((......(((..((((((((..((<<<<<<<-<<<-<<<<<<<<<((((((((..((((.((((((.(((....).)).)))))))))).)))).....)))))))}}}}}}=}}}=}}}}}}}}}=.))))))))..)))......))).)	TTGGTCTGGTTTACATAGACT(1)	-	21	156	-63.22	-40.5256	0.009901
ptc-miRX34	TCACGGACGGCGGCTCCAAGCA	8	26.67	scaffold_103	24625	24646	GTGGAGGTGCTGGTGCTGCTGGAGGCTGCTGGCGGTGTCTTGGCTCACGGACGGCGGCTCCAAGCAGCGGCGGCGGTGCTAC((((.(.(((((.(((((((((((.((((((.(.(((.......->>>->->>>>>>>>>>->>>>))).))))).).))))	NO	+	22	82	-45.7	-55.7317	0.009901
ptc-miRX40	AAGTTGACGGAAGGACTACAT	114	74.03	scaffold_11	18360534	18360554	CAGCAATGTAGTCCTTCCGTCAACTTTGAGATACGTGTTACACTTCTGCATGTCACGTGACCACGCTGTCAAAGTTGACGGAAGGACTACATTGCTG(((((((((((((((((((((((((((((.(..((((((((((........))...)))).)))).).)))>>>>>>>>>>>>>>>>>>>>>)))))	NO	-	21	97	-58.2	-60	0.009901
ptc-miRX44	TGAGTATTCCAACAGCAGTAG	5	50	scaffold_12	2050508	2050528	TCTCTTTTTAATGTTTCTTGCTCAAATGAGTATTCCAACAGCAGTAGCCTTATGCAACAAGAGCATATATTTTTTACTTGTATCACTGTAATATGATGTTGCTGGAATGCTACTGTTTCTGAGATGCTCATTTGAGCAAGTAATATTAGAAGATGA((..(((((((((((.((((((((((<<<<<<<--<<--<<<<<<<<(.((..((((((....(((((......(((..........)))))))).))))))...)).)))))))))..))..))))))))))))))))).)))))))))))..))	NO	-	21	156	-61.4	-39.359	0.009901
ptc-miRX46	TAGGAAAATTAGAGATTATGT	12	100	scaffold_12	6317234	6317254	AAGGTGCAAGGGAGAATAAATGGAATCACAATAGAGTTATCTTAGGAAAATTAGAGATTATGTTTTATTTTATATTATATCTTAATTAGAAATCTACTTATTTTAGGTCTTCATACATGAGTTGTAGATAATTATAATCTCTAATTTTCCTAAGATAATTATACTGCAAATCTTCCATTTATTCTCCATCAGATGCTCCTT((((.(((..(((((((((((((((...((.((.((((((((<<<<<<<<<<<<<<<<<<<<-................(((.....))).((((((..((((...((......))..)))).))))))...)))))))))))))))))))))))))))).)).))......)))))))))))))))......))).)…	NO	+	21	201	-70.6	-35.1244	0.009901
ptc-miRX47	TTCATTCCTCTTCCTAAAATGG	191	92.27	scaffold_12	7706256	7706277	TCTCTTTGCCACGTTGTTCATTCCTCTTCCTAAAATGGCTTCTCCTTCAATTTTAAAAAAAATAAAAATTAAAGGAGAATCCAATATGAAATGAGAAGCTATTTTAGGAAGGGAATGAATACGGTGTCGGTGTTATAAGAGA((((((.((((((..(<<<<<<<<-<<<<<<<<<<<<<((((((.((((.(((((.......)))))......((.....))....))))..)))))))}}}}}}}}}}}}}}}}}}}==))..))).))).....))))))	TATTTTAGGAAGGGAATGAAT(1) ATTTTAGGAAGGGAATGAATA(71) TTTTAGGAAGGGAATGAATA(36)	-	22	142	-55.2	-38.8732	0.009901
ptc-miRX48	TAAGGACAACAACATCATTAC	6	26.09	scaffold_12	10996291	10996311	GACAAAACACTGTGAATTGAAGCAGTGTAATGATGTGGTTGTCCTTGTTAAAGAAACTTGCTAGTCATGCAGTTGGGGGTGAGGTTGTCTTTTTCATAGGATACATTTGACATAGAAAGGATGATTCCCCCATAATGGTCCGTTCGAGTTTTTTGGGTCTGCTGCTGGGGAATGGGCGCCTAACAAGTTTTTTTGGTAAGGACAACAACATCATTACACTGCTTCAATTTATTGTACTTTGTGTC((((....((.(((((((((((((((((((((((((.((((((((((..(((((((((((.(((.....((..((((((...(((..((((((..((.(...........)))..))))))..)))))))))...))((((((((.(((.....…	NO	-	21	245	-103.94	-42.4245	0.009901
ptc-miRX58	TTGACGAAATGTGACGACTAC	5	55.56	scaffold_14	5281887	5281907	GGCCGGGTTTCAAAACTATGAGGTCAAATTTTCTTATATTCGTCACTTTTTGTCAATTCGATCCAATTGGACTGAACAATGTAGTATCCTTGAAGCACTTGGTCATACTTTGTTTACAAATAAGTCTAATTAGTCTGAATTGACGAAATGTGACGACTACAAGGTGATATTGATGAAATTTTATTCTTTGGAGCTTGTTTGCC((((((((((((((...(((((((((((((.((((.((.(((((((.(((((((((((((..(.(((((((((((((((.(((....((..(.....)..))...))).)))))).......))))))))).)..))))>>>>>>>>>->>>>>>>->>-)))).))).))))).....)))))..))))))))))…	NO	-	21	203	-63.21	-31.1379	0.009901
ptc-miRX63	TGAGGCCTTTGGGGGAGAGTGG	767	98.21	scaffold_14	6873257	6873278	CTCTATGCATGGTCTCAGGGTGGCAATCATTGTTCACTCTCCCTCAAGGCTTCCAACGCAATAACCAGCTACGTACATGTAACTGTGTTACGGCTGCAGGCTTGAGGCCTTTGGGGGAGAGTGGTCAAAAGTTGTCATGATTTTGGCAGACGAG(((..(((..((((.....((((((((..(((..(((((((((((((((((((.((.((......((((..(((((((......))).))))))))...)))>>>>>>>->>>>>>>>>>>>>-.)))..))))))))))))...)))...)))	NO	+	22	154	-62.4	-40.5195	0.009901
ptc-miRX64	TAGGCACAGAATTAACAAGGC	161	50.47	scaffold_14	7160402	7160422	TTCTAGAGGTAATTAACATCTAACATCTGCAGACTACTTGCCTTGTTACTGCCGTGCCTATTTTGAATATATATATTCAAAATAGGCACAGAATTAACAAGGCAAGTATTCAGTAGATGTTAGATAGGATGAGCTAAGGCTGGAG((((((.(((.(((...(((((((((((((.((.(((({{{{{{{{{{==={={{{{{{((((((((((....)))))))))>>>>>>>->--->>>>>>>>>))))).)).)))))))))))))..)))..)))....))))))	TGCCTTGTTACTGCCGTGCCT(4)	+	21	145	-71.4	-49.2414	0.009901
ptc-miRX70	CATGATTCTGAATAACGGTTT	7	58.33	scaffold_15	678130	678150	AAAACCGTTATTCAGAATAATGGTTTTGATTTAAACCATGATTCAGAATAGCGGTTGTGTTAAAACCATGATTCTGAATAACGGTTTT((((((((((((((((((.(((((((((((...((((...............))))..))))))))>>>->>>>>>>>>>>>>>>>>)	NO	+	21	88	-39.96	-45.4091	0.009901
ptc-miRX71	TCATTCGAGCAAGAAATATTA	10	90.91	scaffold_15	776168	776188	AGGATTGGAGCTCGCATGGCCTCTTTGTAATGTTTCTTGCTCAAATGAGTATTCCAACAACAGTAGCCTTTTGAACAAGAACATATGTTTTTGCCTTGTATGGTTATGATGTTGCTGGTATTTACTGTTTCTGAGATGCTCATTCGAGCAAGAAATATTAGAAGAGGATATTTTTCTACTAGGGTCTT((((((..((.........(((((((.(((((((((((((((.(((((((((..((..((((((((((.......(((((((....)))))))((......)).............)))...)))))))..))..))))>>>>>->>>>>>>>>>>>>>>)))))))...........))..))))))	NO	+	21	188	-62.95	-33.484	0.009901
ptc-miRX74	TTCATTCCTCTTCCTAAAATGG	191	91.83	scaffold_15	8556726	8556747	GGCTGCTTCTTTTTCTCTCTGGGCACGTTGTTCATTCCTCTTCCTAAAATGGCTTCTTCTCCTTTAGTTGTTGCAATTATAGGAGAGGAGAATCCATTTTAGGAAGGGAATGAATACTGTGTCGGTTTTACGAGGGAGACAATC(..(((((((((......((((.((((.((<<<<<<<<-<<<<<<<<<<<<<.((((((((((.((((((...)))))).))))))))))...}}}}}}}}}}}}}}}}}}}}})).))))))))......))))))).))..)	CCATTTTAGGAAGGGAATGAA(1) ATTTTAGGAAGGGAATGAATA(71)	+	22	144	-66.7	-46.3194	0.009901
ptc-miRX76	TGGACTCCTTTGGGGAGATGG	5	100	scaffold_15	12480617	12480637	ATGCTACTACATGGATGGAGAAGCTTCCGATCTCCCTCAAAGGCTTCCTCTATAATTGCCTTACATGATGGCATTAGTGGACTCCTTTGGGGAGATGGAGAGCTTACTCCCCATAACTCAATGGCAT((((((....((((..(((((((((..(.{{{{{{{={{{{{{=={{{={((....((((.........)))).)))->>>-->>>>>>>>>>>>>->..))))).)))))))).......))))))	ATCTCCCTCAAAGGCTTCCTC(1)	+	21	127	-56.6	-44.5669	0.009901
ptc-miRX78	GTGGAGACATGGAAGTGAAGA	8	38.1	scaffold_16	11016545	11016565	CGCGTTTTTTCTTCTTCTTCTTCTGCACTTCCATGTCTCTATTGTTCACGTGAACAGTGGAGACATGGAAGTGAAGAAGAAGAAGAAGAAGGAGAATG((..((((((((((((((((((((.((((((((((((((((((((((....)))))>>>>>>>>>>>>>>>>>->>>)))))))))))))))))..))	NO	-	21	98	-65.7	-67.0408	0.009901
ptc-miRX79	TAACATCTTGATCAATGGCCA	347	37.51	scaffold_17	1876684	1876704	TGGCTTTCATAGTTATAACATCTTGATCAATGGCCATTGTAAGAGTAGAAGGATCCATGAAGCAATAATTCTCTTTGCTAAAATGTGTGATAAAACATTGACTCCTGGTATTTCACTCTTACAGTGCCCATTGATTAAGATGGTATAATGTTGTTATCA(((.(..((..((((<<-<<<<<<<<<<<<<<<-<<((((((((((.((((...(((.(((((((.........)))))..(((((........)))))...)).)))..)))))))))))))))).))))))))))))))).))))))..))..))))	NO	+	21	159	-57.2	-35.9748	0.009901
ptc-miRX84	TCTGTCGCTGGAAAGATGGTAC	42	70	scaffold_17	10902839	10902860	GGTTTGGGGAGGGGAGTTCTGTCGCTGGAAAGATGGTACCTAGGGCTGCATATTAATGTGTATAGCAAGCAATAGGCACCATCTTCCCGCGACGGAACTCCCCTCTAACCTCTACC(((..((((((((((((<<<<<<<<-<<<<-<<<<<<-<(((..(((((((((......)))).)).)))..)))).)))))))))).)))))))))))))))))...)))..)))	NO	+	22	116	-70.5	-60.7759	0.009901
ptc-miRX85	TATGGGAGAGGCGGGAATGACT	17	80.95	scaffold_17	13549484	13549505	TGTTGGAAAGGAAAGGGAGACTGCTTTACTGGAAGCTTCCGGTATGGGAGAGGCGGGAATGACTCTGAAAGAACTTAGAAGAGTCTTTCCGAGTCCTCCCATACCGCAGATTTCCAGTAGTTCCTCCCTTTACTTATCTTCACTATTCCAGCA(((((((((((((((((((...(((..((((((((((..(((<<<<<<<<-<<<-<<<<-<<<<((.............))))}}=}}}}==}}}}}}}}}}}}}).)).)))))))))))..)))))))).)))..........))))))))	TCTTTCCGAGTCCTCCCATACC(12)	-	22	153	-71.62	-46.8105	0.009901
ptc-miRX99	TAATCTCTCTGCAGAATGCTG	7	36.84	scaffold_2	1273586	1273606	AGGAAGTAAGAGTAGAGTTGGAAGAAATAAGAGAAGAGTCGAGCCAAACTAAAAGAGGAAACTAATATAATCTCTCTGCAGAATGCTGCAAAGCAACATCGTCTAGATCTGAAACATAAGATCAAGCAGAAGTTGGTTTGCTGCACTCTGCTGGGAGATTAGATTAGTTTCCTCTTCTAGTTTGACAGCCTCTTCTCTTATTTCCTCAAACTTCTCCCTGACTTCCT(((((((.((.(..(((((.((.(((((((((((((((.(..(.(((((((.((((((((((((((.<<<<<<<<<-<<<<<-<<<-<((((.((((.((..((.(((((........))))).))..)).)))).))}}}=}}}=}}}}}=}}}}}}})).))))))))))…	TGCTGCACTCTGCTGGGAGAT(1) TGCACTCTGCTGGGAGATTAG(1)	-	21	227	-114.7	-50.5286	0.009901
ptc-miRXX156	TTGACAGAAGATGGAGAGCAC	31	96.88	scaffold_1	34445912	34445932	GTTGACAGAAGATGGAGAGCACAGCTACATGTAATCGAGAATTAGTCCTGTAGAAGTGCAGTTTGTGCTTTGTGTTTTCTTTTCTTCTTTAAAC(<<---<<<<<<-<<<<<<<<<(.(((((.(....(........).).))))).((..(.....)..)).))))))))))..))))))...)))	NO	-	21	94	-24.9	-26.4894	0.029703
ptc-miRXX160e*	GCATGAGGGGAGTCGAGCAGG	7	87.5	scaffold_6	167696	167716	TGGCCTGCCTGGCTCCCTGAATGCCATCTAGGAAGCTTGTCAAAGAGTGTTGGCAACCTTTCTATTTGGCATGAGGGGAGTCGAGCAGGCCA((((({{{={{{{{{{{{=={{{{{{..(((((((.(((((((......))))))).)))))))..))>>>>-->>>>>>>>>->>>>>)))	TGCCTGGCTCCCTGAATGCCA(3)	+	21	92	-59.7	-64.8913	0.009901
ptc-miRXX164	TGGAGAAGCAGGGCACGTGCA	2490	99.24	scaffold_13	945104	945124	GCGGTTTACAATTGGGTGTGTAGCTCTTGCTGGAGAAGCAGGGCACGTGCAAGCTCTCTCCTCAGGCTTTCCTTGCACGTGCTCCCCTTCTCCAACATGGGTTTCTCACCTTTCCTC(.((.........(((((.(.(((((.((.<<<<<<<<--<<<<<<<<<<<((......((...)).....)))))))))))))..)))))))).)).))))).).)))))..)).)	NO	-	21	117	-50.7	-43.3333	0.009901
ptc-miRXX166	TCGGACCAGGCTTCATTCCCC	140119	86.74	scaffold_8	10886861	10886881	AGTTGAGGGGAATGCTGTCTGGTTCGAGACCATTCACCTGAAGCGCACGCATTCATCTTTTGAGTGATCTCGGACCAGGCTTCATTCCCCCCAACT(((((.((((((((..(((((((((((((.((((((..((((((....)).)))).....)))))).))>>>>>>>>>>>-->>>>>>>>.)))))	NO	-	21	96	-54.3	-56.5625	0.009901
ptc-miRXX167h*	AGATCATGTGGCAGTTTCACC	39	95.12	scaffold_13	2408460	2408480	TCATGCACCGCTATTAGTTGAAGCTGCCAACATGATCTGAGCTTTCCTTAATTTTCCTATACAGGAAAGACTAGATCATGTGGCAGTTTCACCTATTGATGGTAGTATGG((((((((((.((.(((.{{{{{{{{{{{={{{{{{{{{..(((((((..............)))))))..)>>>>>>>>>>>>>>>>>>>->)).)).)))).))))))	TGAAGCTGCCAACATGATCTG(1)	+	21	110	-52.24	-47.4909	0.009901
ptc-miRXX169a	AGCCAAGGACGACTTGCCCA	17	34	scaffold_5	6551960	6551979	GAGATGATGGCCTTACATGAAGATAAGAGTCTTGTTTGTAGCCAAGGACGACTTGCCCACAATATGTATCGTGAGCGTTTCCAATTTGCAACCTCATACTTGGTTGTTTTGGGCAGTCTCCTTGGCTATGCAGATGGACTCTTCTCAGTCATGATAGGCATCTTCTC((((.((((.(((..(((((.((.((((((((.((((((<<<<<<<<<-<<<<-<<<<<..........(....)............((((((........)))))).=}}}}}}}}}}}}}}}}}}=.)))))))))))))).))..)))))..))))))).))))	TTGGGCAGTCTCCTTGGCTA(1)	+	20	167	-71.82	-43.006	0.009901
ptc-miRXX169b	AGCCAAGGACGACTTGCCCA	17	34	scaffold_7	6019711	6019730	GAGATGATGGTCTTGCATGAAGATAAGAGTGTTGTTCGGTAGCCAAGGACGACTTGCCCACACTATGAGACAAGTGGTTAGAATTAGCAACTTCTTAATTGGTTATGGGAAGTCTCCTTGGCTATGCTGACAGACTCTTCTCGATCATGCCAGGCATCTTCTT((((.((((.(((.((((((.((.((((((.((((.((((<<<<<<<<<-<<<<<-<<<<.(((((((((..(((.((((....)))).))))))))..))))..))))))))))))))))))..)))))))))))))).))..)))))).))))))).))))	NO	-	20	163	-69	-42.3313	0.009901
ptc-miRXX169d	CAGCCAAGGATGACTTGCCGG	8	53.33	scaffold_18	14350505	14350525	GGTGTAGGAGTTTTGCATGAAGAGGTAGAGAGTAGAATGCAGCCAAGGATGACTTGCCGGCATTTCCTCCCAGCTAGCTAGCAAGCCTTCTATTTGGCATGCCTGGCCGGCAGGATGTCCTTGGCTATATTTTGTTCTCTTCTTCTCATGTGAGACTCCAGGCC(((.(.(((((((..(((((.((((.(((((((((((((-<<<<<<<<<<<-<<<<<<<<(..........((....)).(((.(((........))).)))...))))))))).))))))))))).))))))))))))).)))))))))..)))))))).)))	NO	-	21	164	-87.8	-53.5366	0.009901
ptc-miRXX169e	CAGCCAAGGATGACTTGCCGA	79	81.44	scaffold_13	4145229	4145249	TCACTGTAACAGCCTTGCATGGAGGATCATAAAGATTGATGCAGCCAAGGATGACTTGCCGACGACTCGTTTTTGCTTCCATCAATATACGCATAATTAAGAAGAGATGAATCCGTTGGCAGGTTGTTCTTGGCTACATTTTTCTTTCTGCTCCTCATGCCAGGCTTATGGTGA((((((((..(((((.(((((.((((.((.(((((..((((-<<<<<<<<<--<<<<<<<<<((..((((((((.(((....................))).))))))))...))}}}}}}}}}==}}}}}}}}}=))))..))))).)).))))))))).)))))))))))))	TTGGCAGGTTGTTCTTGGCTA(1) TGGCAGGTTGTTCTTGGCTAC(42) GGCAGGTTGTTCTTGGCTACA(6) GGCAGGTTGTTCTTGGCTAC(62)	+	21	174	-80.85	-46.4655	0.009901
ptc-miRXX171	TGATTGAGCCGTGCCAATATC	59	93.65	scaffold_5	7776956	7776976	GGGATTGTTTACCGTGTTGAAATCATGTGGAAGAGTGACTATGATATTGGCCTGGTTCACTCAGATCACGACTTCAGAGCAAAGTGTCTTTCTTCTTCTTCTTTTTCTTCTTCTTCTTGTTTTATGTTCGTTTGATTTGATTGAGCCGTGCCAATATCTCAGTACTCTTTCATGTCTCTCCAAGTCGATCTCCAGAAACACTATTCC((((((((((.....(((((....(((((((((((((.((..(({{{{{{{={{{{{{{={{{{{((((((.(..(((((((..................................)))))))..).))))..))))>>>->>>>>>>->>>>>>>>>..))))))))))))))).........)))))...…	TATTGGCCTGGTTCACTCAGA(2)	+	21	207	-60.5	-29.2271	0.009901
ptc-miRXX171g*	TGATTGAGCCGTGCCAATATC	59	92.19	scaffold_12	11044679	11044699	GAGAAAGTGGGGGATGTTGGGATGGCTCAATCATGTCAAATCTCCCAAATTATGATGTTGGGTCTTTTAATCTGATTGAGCCGTGCCAATATCACACTTCTT(((((.(((...(({{{{{{={{{{{{{{{{{{={(.(((...(((((.........)))))...))).)).>>>>>>>>>>>>->>>>>>>>.))))))))	TGTTGGGATGGCTCAATCATG(1) GTTGGGATGGCTCAATCATGT(1)	+	21	102	-46.1	-45.1961	0.009901
ptc-miRXX171h*	TGATTGAGCCGTGCCAATATC	59	92.19	scaffold_15	11748131	11748151	GGTAAGTTCGGAGAAAGTGGGGGATGTTGGGATGGCTCAATCATATCAAATCTCCCAAACTATGATGTTGGGTCGTTTAATCTGATTGAGCCGTGCCAATATCACACTAACTATATATGATCC((...((....((..((((...((((((((.((((((((((((.((.((((..(((((.(......))))))..)))).)).>>>>>>>>>>>>->>>>>>>>.))))..))....))...))	NO	+	21	123	-48	-39.0244	0.009901
ptc-miRXX2111a	TTACCAATACCTCTCATGCCAA	45	95.74	scaffold_5	11901582	11901603	GAGAAGAGCCGGAGGGGGAGACTGAGACCTACTGGAAGTTGTGGGCATGAGGTGTTTGGCAAGAAAATGGATCTTTTCCTTATGATGATTTCTTACCAATACCTCTCATGCCAATGATTTCCAGCAGTTCCTCCCTTTCCCTTCTTTCTC((((((((..((((((((((((((.......((((((((..(.(((((((((.((((((.((((((..(((.....))).........))))>>->>>>->>->>>>>>>>>->..))))))))))))..)))))))))).))).)))))	NO	-	22	150	-62.71	-41.8067	0.009901
ptc-miRXX393*	ATCATGCTATCCCTTTGGATT	7	87.5	scaffold_10	17888043	17888063	GCAACTAGAGGAGGCATCCAAAGGGATCGCATTGATCCCGAGTGTCCCTGGCCATAATTTTGGATCATGCTATCCCTTTGGATTCCTCCTTTGGTGGC((.(((((((((((.({{{{{{{{{{{={{{{={{{{(.((((.............)))).))>>>>>>>->>>>>>>>>>>>-))))))))))).))	TCCAAAGGGATCGCATTGATC(2)	-	21	98	-54.32	-55.4286	0.009901
ptc-miRXX393a*	ATCATGCTATCCCTTTGGATT	7	87.5	scaffold_8	3747134	3747154	ATGTTTTTACTGCAACTAGAGGAGGCATCCAAAGGGATCGCATTGATCCCAAGTGTCTGTCCCCCATAATTTTGGATCATGCTATCCCTTTGGATTCCTCCTTTGGTGGCTTCTATAACAT(((((......((.(((((((((((.({{{{{{{{{{{={{{{={{{{(.((((...((.....))..)))).))>>>>>>>->>>>>>>>>>>>-))))))))))).))......)))))	TCCAAAGGGATCGCATTGATC(2)	+	21	121	-58	-47.9339	0.009901
ptc-miRXX395	CTGAAGTGTTTGGGGGAACTC	80	95.24	scaffold_761	162	182	ATCAAGTGTCCCCTAGAGTTCCTCTGAGCACTTCATTGGGGATCTTCCATCGACCTGAGAGAGTATTATCATTCCTACTGAAGTGTTTGGGGGAACTCCTGGTGTCATTTGAT((((((((.(.((..(((((((((..(((((((((.(((((((((..((......))..))).........))))))->>>>>>>>>-->>>>>>>>>..)).).))))))))	NO	+	21	113	-52.8	-46.7257	0.009901
ptc-miRXX395a	CTGAAGTGTTTGGGGGAACTC	80	95.24	scaffold_761	7013	7033	GAAACGCAAAGAACGTTAGCTGTCCCCCGGAGTTTCCCTGACCACTTCACTGGGGCTATAATTCTACTCTTCGTGTTCAAGGGTAGTGGCAACCCTTCCTCACTGAAGTGTTTGGGGGAACTCTGGGTGGCATTTGACACTGTTTAGCAGTC((...(((((.(..(((((.((((.((((((({{{{{{=={={{{{{{{={{{((........((((((((.......)))))))).(....)....)))))->>>>>>>->-->>>>>>>>>)))).)))).)))))..).))).))..))	TTTCCCTGACCACTTCACTGG(1)	-	21	152	-64.4	-42.3684	0.009901
ptc-miRXX395b	CTGAAGTGTTTGGGGGAACTC	80	95.24	scaffold_792	1141	1161	GAAACGCAAAGAACGTTAGCTGTCCCCCGGAGTTTCCCTGACCACTTCACTGGGGCTATAATTCTACTCTTCGTGTTTAAGGGTAGAGGCAACCCTTCCTCACTGAAGTGTTTGGGGGAACTCTGGGAGGCATTTGACACTGTTTAGCATTC(((..(((((.(..(((((.((((.((((((({{{{{{=={={{{{{{{={{{((......((((((((((.......)))))))))).........)))))->>>>>>>->-->>>>>>>>>)))).)))).)))))..).))).)).)))	TTTCCCTGACCACTTCACTGG(1)	+	21	152	-66.76	-43.9211	0.009901
ptc-miRXX396	TTCCACAGCTTTCTTGAACTT	1845	78.44	scaffold_6	4643011	4643031	GAAAGTCCTGGTCATGCTTTTCCACAGCTTTCTTGAACTTCCTTGCCATGCTTAACTTGTGTGTGTGTATAGATCACTATATATCTGTATAGTTATACACATTTAGCTAGCTAGCACCATTGAAGCTCAAGAAAGCCGTGGGAGAACATGGCAACTCAGGATTTTT((((((((((((((((.((<<<<<<-<<<<<<<<<<-<<<(..((...((((...((.((..(((((((((....(((((((....))))))))))))))))...)).))..)))).))==}}}}=}}}}}}}}}}=}}}))))).))))))....))))))))))	TTGAAGCTCAAGAAAGCCGTG(1) GAAGCTCAAGAAAGCCGTGGG(1) AAGCTCAAGAAAGCCGTGGGA(9) GCTCAAGAAAGCCGTGGGAGA(12) CTCAAGAAAGCCGTGGGAGA(110)	-	21	166	-70.5	-42.4699	0.009901
ptc-miRXX396*	CTCAAGAAAGCTGTGGGAGA	10248	68.67	scaffold_18	13223920	13223939	CTCGCAAGTCCTGGTCATGCTTTTCCACAGCTTTCTTGAACTTCTTTGCCTTGCTTAATCTGTGTATATATAGATCACTACATGTACAGCTCCTATATATATAAATATATGTATGTATAGCGCCATGGAAGCTCAAGAAAGCTGTGGGAGAACATGGCAATTCAGGATTTTTTTGGG((((.((((((((((((((.(({{{{{{{{{{{{{{{{{={{(((..((.............(((((((.(((....))).)))))))....(((((((((((......))))))))))).))...)))))->>>>>>>>>>>>>>>>>>>.))))))....))))))))...))))	TTCCACAGCTTTCTTGAACT(31) TCCACAGCTTTCTTGAACTT(2)	-	20	177	-71.1	-40.1695	0.009901
ptc-miRXX398	TGTGTTCTCAGGTCGCCCCTG	62	72.94	scaffold_1	26837937	26837957	TGTAAAAGGGTTCCGACAGGAGCGGCCTTGGCTCACATGTGGCGGCATCCAATGTACTTCATGTGTTCTCAGGTCGCCCCTGCCGGGCTTCCTCTACA((((..((((.((((.((((.(((((((.((..((((((.((..((((...)))).)).))>>>>-->>->>>>>>>->>>>.))))..)))).))))	NO	-	21	98	-42.5	-43.3673	0.019802
ptc-miRXX403c*	TTTGTGCGTGGATCTGAGGCC	625	95.71	scaffold_8	6485435	6485455	TCTTCTCCCCTAACAAGAGGAGTCCTATCTCTGGTTTGTGCGTGGATCTGAGGCCATCACAACCGTCCACTACACGACCACCCAATGGCTTTAGATTCACGCACAAACTCGCGATCTGTCTCCTCTACTACACCGAATAGA(((..((........(((((((.(..(((.(.((<<<<<<<<<<<<<<<<<<<<<((.......(((........)))......))))))))))))))))))))))))).).)))..).)))))))........))..)))	NO	+	21	141	-58.41	-41.4255	0.009901
ptc-miRXX408*	CGGGGAACAGGCAGAGCATGG	4394	77.33	scaffold_2	14802211	14802231	AGGGATCGTGGGGAGAGGGAGCAGAGACAGATGAAGACGGGGAACAGGCAGAGCATGGATGGAGCTACTAACAGAAGTACTTGTTTTGGCTCTACCCATGCACTGCCTCTTCCCTGGCTTGTGGCTCTTCCTTTTCTCCTCCCT(((((....(((((((((((..((((.((.(.(....<<<<<<<-<<<<<<-<<<<<<.((((((((..(((((......))))).)))))))).)}}}}}=}}}}}}=}}}}}}}=).).)).))))))))))))))))))))	CATGCACTGCCTCTTCCCTGG(1) ATGCACTGCCTCTTCCCTGGC(762) ATGCACTGCCTCTTCCCTGG(4) TGCACTGCCTCTTCCCTGGCT(99) TGCACTGCCTCTTCCCTGGC(25)	+	21	144	-76.2	-52.9167	0.009901
ptc-miRXX475b*	TAACATCTTGATCAATGGCCA	347	37.55	scaffold_8	14223580	14223600	GTCATAACATCTTGATCAATGGCCATTGTAAGAGTAGAAGGATCCATGAAGCAATAACTCTCTTTGCTGAAATGTGCGACCAAATAGACTCTTGATATTTCATTCTTACAGTGCCCATTGATTAAGATGTTATAAC((.(<<<<<<<<<<<<<<<<<<-<<((((((((((.((((.((((((..(((((.........)))))...)))...................))).)))))))))))))}}}=}}}}}}}}}}}}}}}}})).))	GTGCCCATTGATTAAGATGTT(4)	-	21	136	-49.9	-36.6912	0.009901
Alignment of all leaf smallRNA reads and miRNA hairpins.
Schematic of folding structure as produce by RNAfold is shown below hairpin. Location of miRNA in hairpin is indicatd by '<' or '>' symbol. Brackets '{' or '}' indicate the position of matched nucleotides in miRNA*. '-' and '=' are mismatches in miRNA and miRNA*, respectively. Dots '.' are mismatches in non-miRNA portion of hairpin.
ptc-miR1444a
ttcgagtttatcacttgaatgttgaccgaatatggatgaaaagttgttttctgtttcctttccTCCACATTCGGTCAATGTTCCagtgatgagcatgaa 1401
((((.((((((((((={{{{{{{{{{{{{{{={{{{.((((.(..(........)..))))).>>>>->>>>>>>>>>>>>>>-)))))))))).))))
gagtttatcacttgaatgttgacc 2
tttatcacttgaatgttgacc 1
tatcacttgaatgttgaccga 1
tcacttgaatgttgaccgaat 2
tcacttgaatgttgaccgaa 1
tgaatgttgaccgaatatggat 2
tgaatgttgaccgaatatgga 44
tgaatgttgaccgaatatggatg 3
tgaatgttgaccgaatatggatga 18
gaatgttgaccgaatatggatg 5
gaatgttgaccgaatatggat 2
gaatgttgaccgaatatggatgaa 17
aatgttgaccgaatatggatg 55
aatgttgaccgaatatggatga 1
aatgttgaccgaatatggatgaa 4
aatgttgaccgaatatggatgaaa 20
atgttgaccgaatatggatg 2
atgttgaccgaatatggatga 3
tgttgaccgaatatggatgaaaa 1
tgttgaccgaatatggatgaaaagt 1
tgttgaccgaatatggatgaaaag 5
tgttgaccgaatatggatgaa 9
tgttgaccgaatatggatg 1
ttgaccgaatatggatgaaaa 11
tgaccgaatatggatgaaaag 1
cctttcctccacattcggtca 1
ttcctccacattcggtcaatg 2
tcctccacattcggtcaatgttcc 3
cctccacattcggtcaatgttcca 3
ctccacattcggtcaatgttccag 2
ctccacattcggtcaatgttc 25
tccacattcggtcaatgt 7
tccacattcggtcaatgttc 5
tccacattcggtcaatgtt 4
tccacattcggtcaatgttcca 34
TCCACATTCGGTCAATGTTCC 1093 miRNA
ccacattcggtcaatgttcca 1
cacattcggtcaatgttcca 1
cacattcggtcaatgttcc 7
ttcggtcaatgttccagtgat 1
ptc-miR1444b
tcgaatatttccttgtttatccctcgaatattgatcgaatatgtatgaaatatgatggttatatgtttcattCACATTCGGTCAACGTTCGAGtgataaacagaaataattgg 5587
((((.((((((..(((((({{={{{{{{=={{{{{{{{{{.((.((((((((((.......)))))))))).>>->>>>>>>>>>-->>>>>>.)))))))))))))).))))
ttatccctcgaatattgatcg 1
tccctcgaatattgatcgaat 4
cctcgaatattgatcgaata 1
cctcgaatattgatcgaatat 5
ctcgaatattgatcgaatatgt 1
ctcgaatattgatcgaatatg 5
ctcgaatattgatcgaatat 2
tcgaatattgatcgaatatgt 3
tcgaatattgatcgaatatgta 2
cgaatattgatcgaatatg 7
cgaatattgatcgaatatgt 7
cgaatattgatcgaatatgtat 2
cgaatattgatcgaatatgta 771
cgaatattgatcgaatat 1
cgaatattgatcgaatatgtatgaa 1
gaatattgatcgaatatgta 3
aatattgatcgaatatgtatgaaa 1
tattgatcgaatatgtatgaa 1
attgatcgaatatgtatgaaat 2
ttgatcgaatatgtatgaaat 199
ttgatcgaatatgtatgaaa 2
tgtttcattcacattcggtcaacg 2
tttcattcacattcggtcaacgt 2
ttcattcacattcggtcaacg 74
tcattcacattcggtcaacgt 2
cattcacattcggtcaacgttcgag 1
attcacattcggtcaacg 1
attcacattcggtcaacgttcgag 589
attcacattcggtcaacgttcg 2
ttcacattcggtcaacgttcg 1
tcacattcggtcaacgttcgag 8
tcacattcggtcaacgttcga 15
cacattcggtcaacgttcgagt 2
cacattcggtcaacgttcg 2
cacattcggtcaacgttc 1
CACATTCGGTCAACGTTCGAG 3693 miRNA
acattcggtcaacgttcgag 25
acattcggtcaacgttcgagtg 2
acattcggtcaacgttcgagt 22
cattcggtcaacgttcgagtg 47
cattcggtcaacgttcgag 7
cattcggtcaacgttcgagt 10
attcggtcaacgttcgag 3
attcggtcaacgttcgagtga 11
attcggtcaacgttcgagtg 2
ttcggtcaacgttcgagtgat 41
tcggtcaacgttcgagtgata 1
ptc-miR1444c
tcgaatatttccatttttatccctcgaatattgatcgaatatgtatgaaatatgatggttaaatgtttcattCACATTCGGTCAACGTTCGAGtgataaacagaaataattgg 5587
((((.((((((....(((({{={{{{{{=={{{{{{{{{{.((.(((((((((.........))))))))).>>->>>>>>>>>>-->>>>>>.))))))..)))))).))))
ttatccctcgaatattgatcg 1
tccctcgaatattgatcgaat 4
cctcgaatattgatcgaata 1
cctcgaatattgatcgaatat 5
ctcgaatattgatcgaatatgt 1
ctcgaatattgatcgaatatg 5
ctcgaatattgatcgaatat 2
tcgaatattgatcgaatatgt 3
tcgaatattgatcgaatatgta 2
cgaatattgatcgaatatg 7
cgaatattgatcgaatatgt 7
cgaatattgatcgaatatgtat 2
cgaatattgatcgaatatgta 771
cgaatattgatcgaatat 1
cgaatattgatcgaatatgtatgaa 1
gaatattgatcgaatatgta 3
aatattgatcgaatatgtatgaaa 1
tattgatcgaatatgtatgaa 1
attgatcgaatatgtatgaaat 2
ttgatcgaatatgtatgaaat 199
ttgatcgaatatgtatgaaa 2
tgtttcattcacattcggtcaacg 2
tttcattcacattcggtcaacgt 2
ttcattcacattcggtcaacg 74
tcattcacattcggtcaacgt 2
cattcacattcggtcaacgttcgag 1
attcacattcggtcaacg 1
attcacattcggtcaacgttcgag 589
attcacattcggtcaacgttcg 2
ttcacattcggtcaacgttcg 1
tcacattcggtcaacgttcgag 8
tcacattcggtcaacgttcga 15
cacattcggtcaacgttcgagt 2
cacattcggtcaacgttcg 2
cacattcggtcaacgttc 1
CACATTCGGTCAACGTTCGAG 3693 miRNA
acattcggtcaacgttcgag 25
acattcggtcaacgttcgagtg 2
acattcggtcaacgttcgagt 22
cattcggtcaacgttcgagtg 47
cattcggtcaacgttcgag 7
cattcggtcaacgttcgagt 10
attcggtcaacgttcgag 3
attcggtcaacgttcgagtga 11
attcggtcaacgttcgagtg 2
ttcggtcaacgttcgagtgat 41
tcggtcaacgttcgagtgata 1
ptc-miR1446a
ggatgttgaagatccaacttcTTCTGAACTCTCTCCCTCAACcgctactctagagcttggcaatccttgtcgattgtttctgtgtagcggttgaggtgaggggttcagaacatgttggcttcgatgattc 421
(((((((((((..(((((...<<<<<<<<<<-<<<<<<<<<<((((((.(..((((((((((.....))))))..))))..).))))))))))))).)))))))))))))...)))))))))))).))))
tcttctgaactctctccctca 1
TTCTGAACTCTCTCCCTCAAC 323 miRNA
ttctgaactctctccctcaa 3
ttctgaactctctccctcaacc 2
tctgaactctctccctcaac 2
ctgaactctctccctcaaccgct 1
tgaactctctccctcaaccgct 80
tgaactctctccctcaac 1
tgaactctctccctcaaccgc 2
cggttgaggtgaggggttcaga 6
ptc-miR1446b
ttgaagatccaatttcTTCTGAACTCTCTCCCTCAACcgccactctagaggttggcaccttgtcaattgtttctgtgtagcggtcgaggtgaggggttcagaacatgttggctttga 380
(..(((..(((((...<<<<<<<<<<-<<<<<<<-<<(((.((.(.((((((((((.....))))))...))))).)).))))).)))).)))))))))))))...))))))))..)
tcttctgaactctctccctca 1
TTCTGAACTCTCTCCCTCAAC 323 miRNA
ttctgaactctctccctcaa 3
ttctgaactctctccctcaacc 2
tctgaactctctccctcaac 2
tgaactctctccctcaac 1
tgaactctctccctcaaccgcca 1
tgaactctctccctcaaccgcc 17
tgaactctctccctcaaccgc 2
ttgtcaattgtttctgtgtagcgg 1
ttgtcaattgtttctgtgtagcggt 5
tgtcaattgtttctgtgtagcggt 2
tgtcaattgtttctgtgtagcgg 1
caattgtttctgtgtagcgg 1
caattgtttctgtgtagcggt 16
cggtcgaggtgaggggttcaga 2
ptc-miR1446c
gaatgttggaaatccaactttTTCTGAACTCTCTCCCTCAACtgctattctagagcttcctgagctaacccttgtgtttctgtgtagcagtcaaggtgggaggctcagaaaatgttggtttcttagcttttc 346
(((.((((((((.(((((.((<<<<<<-<-<<<<<<<<--<<((((((.(..((((....((((......)))).))))..).))))))))..))).)))))).)))))))).))))))))).))))..)))
ttctgaactctctccctcaact 17
TTCTGAACTCTCTCCCTCAAC 323 miRNA
ttctgaactctctccctcaa 3
tctgaactctctccctcaac 2
tgaactctctccctcaac 1
ptc-miR1446e
gtatcagaatgttggtgatccaactttTTCTGAACTCTCTCCCTCAACtgctattctagagcttgttaatccttgtcaagtgtttccctgtagcagtcgaggcgagggggtttcggaaaatgttggctcctcagctcttaattac 346
(((.......(((((.((.(((((.((<<<<<<<<<<<<<<<<<<-<<((((((......(((((...........)))))........)))))))).)))).))))))).))))))))).))))).)).))))).......)))
ttctgaactctctccctcaact 17
TTCTGAACTCTCTCCCTCAAC 323 miRNA
ttctgaactctctccctcaa 3
tctgaactctctccctcaac 2
tgaactctctccctcaac 1
ptc-miR1447
gtgaacgaaggaggccctaatcagggcactgcaattctaaatgtctgttggcaagtggcgatgccagacgtttgaaatttacttatcatttattagtCAGAATTGCAGTGCCTTGATTtgggctttgtctgttcc 1158
(.(((((.(.(((((((.({{{{{{{{{{{{{{{{{{{{{((((((...((((........)))))))))))).......(((...........)))->>>>>>>>>>>>>>>>>>>>.))))))).).))))))
atcagggcactgcaattctaa 1
tcagggcactgcaattct 1
tcagggcactgcaattctaaa 209
tcagggcactgcaattctaaat 51
tcagggcactgcaattctaa 103
cagggcactgcaattctaa 1
agggcactgcaattctaaa 1
agggcactgcaattctaaat 1
cagaattgcagtgccttg 1
cagaattgcagtgccttgattt 1
cagaattgcagtgccttgat 5
cagaattgcagtgccttga 12
CAGAATTGCAGTGCCTTGATT 762 miRNA
agaattgcagtgccttgatt 9
ptc-miR156a
gagggacacaaaagaaagacTGACAGAAGAGAGTGAGCACacacgaaagtatatggtatgaaggcattccattgcagggtgtgtgctcacatctcttctgtcagcttccacttccaagtgtttcctc 22209
(((((((((..(((.(((.(<<<<<<<<<<<<<<<<<<<<((((....(((.((((.(((....))).)))))))...)))))))))))).))))))))))))))))...)))....))).))))))
actgacagaagagagtgagcac 3
ctgacagaagagagtgagcaca 2
ctgacagaagagagtgagcac 545
ctgacagaagagagtgagca 2
tgacagaagagagtgagc 21
tgacagaagagagtgagca 66
TGACAGAAGAGAGTGAGCAC 21041 miRNA
tgacagaagagagtgagcaca 493
gacagaagagagtgagcacac 1
gacagaagagagtgagcac 11
gacagaagagagtgagcaca 1
acagaagagagtgagcac 6
acagaagagagtgagcaca 4
acagaagagagtgagcacac 12
cagaagagagtgagcacac 1
ptc-miR156b
agaatcgagggttttaagggtaagggaggTGACAGAAGAGAGTGAGCACacagggtactttcttgcatgacatccatgcttgaaactttgcgtgctcactctctatctgtcaccccaccaccatctctctctctttctcttcccctttccctgtct 21659
(((....((((....(((((.((((((((<<<<<<<<<<<<<<<<<<<<.((((((...(((..(((((.....)))))..))))))))).))))))))))))).))))))))).....................)))))).))))).)))).)))
gtgacagaagagagtgagcac 2
tgacagaagagagtgagc 21
tgacagaagagagtgagca 66
TGACAGAAGAGAGTGAGCAC 21041 miRNA
tgacagaagagagtgagcaca 493
gacagaagagagtgagcacac 1
gacagaagagagtgagcac 11
gacagaagagagtgagcaca 1
acagaagagagtgagcac 6
acagaagagagtgagcaca 4
acagaagagagtgagcacac 12
cagaagagagtgagcacac 1
ptc-miR156c
ttctggacattagaaacTGACAGAAGAGAGTGAGCACacagaggcatatttgtataaatctataccattgcttttgcgtgctcacttctcattctgtcagcttccagag 22246
(((((((....((...(<<<<<<<<<<<<<<<<<<<<.((((((((.....(((((....)))))...)))))))).)))))))).)))).))))))))))))))))))
gaaactgacagaagagagtgagcac 2
aactgacagaagagagtgagcac 31
actgacagaagagagtgagcac 3
ctgacagaagagagtgagcaca 2
ctgacagaagagagtgagcac 545
ctgacagaagagagtgagca 2
tgacagaagagagtgagc 21
tgacagaagagagtgagca 66
TGACAGAAGAGAGTGAGCAC 21041 miRNA
tgacagaagagagtgagcaca 493
gacagaagagagtgagcacac 1
gacagaagagagtgagcac 11
gacagaagagagtgagcaca 1
acagaagagagtgagcac 6
acagaagagagtgagcaca 4
acagaagagagtgagcacac 12
cagaagagagtgagcacac 1
gctcacttctcattctgtcagc 4
ptc-miR156d
gattcgagggttttaagggtaagtgagtTGACAGAAGAGAGTGAGCACacagggtactttcttgcatgacgttcatgcttgaagctttgcgtgcccaccctctatctgtcaccccatcaccatctctccttctcttcccctttccttgcctgtc 27368
(((.((((((....(((((.(((.(((.<<<<<<<<<<<-<<<-<<<<.((((((...(((..(((((.....)))))..))))))))).)))).))).)))).)))))))..................))).))).)))))))))))...)))
ttgacagaagagagtgagcac 5685
ttgacagaagagagtgagcaca 1
ttgacagaagagagtgag 1
ttgacagaagagagtgagca 11
ttgacagaagagagtgagc 13
tgacagaagagagtgagc 21
tgacagaagagagtgagca 66
TGACAGAAGAGAGTGAGCAC 21041 miRNA
tgacagaagagagtgagcaca 493
gacagaagagagtgagcacac 1
gacagaagagagtgagcaca 1
gacagaagagagtgagcac 11
acagaagagagtgagcac 6
acagaagagagtgagcaca 4
acagaagagagtgagcacac 12
cagaagagagtgagcacac 1
ptc-miR156e
ttccagcttctgggacattagaaatTGACAGAAGAGAGTGAGCACacagaggcatatttgtataaaattataccattgcttttgcgtgctcatttctctttctgtcacttccagagccggaa 27373
((((.(((.((((((..........<<<<<<<<<<<<<<<<<<<<.((((((((.....(((((....)))))...)))))))).))))))).))))).)))))))).))))))))).))))
aattgacagaagagagtgagcac 2
attgacagaagagagtgagcac 1
ttgacagaagagagtgagcac 5685
ttgacagaagagagtgagcaca 1
ttgacagaagagagtgag 1
ttgacagaagagagtgagca 11
ttgacagaagagagtgagc 13
tgacagaagagagtgagc 21
tgacagaagagagtgagca 66
TGACAGAAGAGAGTGAGCAC 21041 miRNA
tgacagaagagagtgagcaca 493
gacagaagagagtgagcacac 1
gacagaagagagtgagcac 11
gacagaagagagtgagcaca 1
acagaagagagtgagcac 6
acagaagagagtgagcaca 4
acagaagagagtgagcacac 12
cagaagagagtgagcacac 1
gctcatttctctttctgtcact 2
ptc-miR156f
gagggtcacaagagaaagacTGACAGAAGAGAGTGAGCACacacgaaagctaattgtatgaaagcataccattgcagggtgtgtgctcacttctcttctgtcagcttacatttgccagtgtttcctc 22220
(((((.(((.(((..(((.(<<<<<<<<<<<<<<<<<<<<((((....((.(((.(((((....))))).)))))...)))))))))))).))))))))))))))))...)))....)))..)))))
actgacagaagagagtgagcac 3
ctgacagaagagagtgagcaca 2
ctgacagaagagagtgagcac 545
ctgacagaagagagtgagca 2
tgacagaagagagtgagc 21
tgacagaagagagtgagca 66
TGACAGAAGAGAGTGAGCAC 21041 miRNA
tgacagaagagagtgagcaca 493
gacagaagagagtgagcacac 1
gacagaagagagtgagcac 11
gacagaagagagtgagcaca 1
acagaagagagtgagcac 6
acagaagagagtgagcaca 4
acagaagagagtgagcacac 12
cagaagagagtgagcacac 1
gtgctcacttctcttctgtcag 2
tgctcacttctcttctgtcagc 8
gctcacttctcttctgtcagc 1
ptc-miR156g
ttgaattatgtgaggaggcactggtgatgttgTTGACAGAAGATAGAGAGCACagatgatgaaatgcatggagcttaattgcatctcactcctttgtgctctctagtcttctgtcatcaccttcagcccctcactccgtttaa 59121
((((((...((((((.(((...(((((.....-<<<<<<<<<<<<<<<<<<<<(((.(((((.(((((...........))))).))).)).)))))))))))).))))))))))))))))....)))))))))...))))))
tgttgttgacagaagatagagagc 1
ttgttgacagaagatagagag 9
ttgttgacagaagatagaga 1
tgttgacagaagatagagagc 11
tgttgacagaagatagagag 4
tgttgacagaagatagagagca 1
tgttgacagaagatagaga 1
tgttgacagaagatagagagcaca 2
tgttgacagaagatagagagcac 1
ttgacagaagatagagagcacag 2
ttgacagaagatagagagcaca 38
ttgacagaagatagagagca 211
ttgacagaagatagagagcacagat 1
ttgacagaagatagagag 4
ttgacagaagatagagagc 70
TTGACAGAAGATAGAGAGCAC 56612 miRNA
tgacagaagatagagagc 4
tgacagaagatagagagca 5
tgacagaagatagagagcaca 90
tgacagaagatagagagcac 2026
gacagaagatagagagcac 20
acagaagatagagagcac 3
acagaagatagagagcacag 3
cagaagatagagagcacagat 1
ptc-miR156h
gtgaaggaggcactggtgatgctgTTGACAGAAGATAGAGAGCACtgacgatgaaatgcatggagcttaattgcatctcactcctttgtgctctctagtcttctgtcatcaccttcagcccttcac 59811
(((((((..((...(((((.....-<<<<<<<<<<<<<<<<<<<<.((.(((((.(((((...........))))).))).)).)).))))))))).))))))))))))))))....)))))))))
ctgttgacagaagatagagagcac 1
tgttgacagaagatagagagc 11
tgttgacagaagatagagag 4
tgttgacagaagatagagagca 1
tgttgacagaagatagaga 1
tgttgacagaagatagagagcac 1
ttgacagaagatagagagca 211
ttgacagaagatagagag 4
ttgacagaagatagagagc 70
TTGACAGAAGATAGAGAGCAC 56612 miRNA
ttgacagaagatagagagcact 777
ttgacagaagatagagagcactg 3
tgacagaagatagagagc 4
tgacagaagatagagagca 5
tgacagaagatagagagcact 57
tgacagaagatagagagcac 2026
gacagaagatagagagcac 20
acagaagatagagagcac 3
ptc-miR156i
gggagttgtgtggagaggaggcacttgtgatgttgTTGACAGAAGATAGAGAGCACagatgatgttttgcagtagactctggatctcactcctttgtgctctctatgcttctgccatcaccttcagccccgacccccagtcccc 59123
(((..(((.(.((...((.(((....((((((...--<-<<<<<<<<<<<<<<<<<(((.((((...(.(((......))).)...)).)).)))))))))))))).))))))))))))).....)))))...))))))..)))
tgttgttgacagaagatagagagc 1
ttgttgacagaagatagagag 9
ttgttgacagaagatagaga 1
tgttgacagaagatagagagc 11
tgttgacagaagatagagag 4
tgttgacagaagatagagagca 1
tgttgacagaagatagaga 1
tgttgacagaagatagagagcaca 2
tgttgacagaagatagagagcac 1
ttgacagaagatagagagcacag 2
ttgacagaagatagagagcaca 38
ttgacagaagatagagagca 211
ttgacagaagatagagagcacagat 1
ttgacagaagatagagag 4
ttgacagaagatagagagc 70
TTGACAGAAGATAGAGAGCAC 56612 miRNA
tgacagaagatagagagc 4
tgacagaagatagagagca 5
tgacagaagatagagagcaca 90
tgacagaagatagagagcac 2026
gacagaagatagagagcac 20
acagaagatagagagcac 3
acagaagatagagagcacag 3
cagaagatagagagcacagat 1
gctctctatgcttctgccatc 2
ptc-miR156j
gggggagaaggaggcactggtgatgttgTTGACAGAAGATAGAGAGCACagatgatgatatgcaatggactctgcatcccactcctttgtgctctctatgcttctgtcatcactttcagccccgaccccctcctcctcctcctcc 59126
(((((((.((((((....((((..((((-<<<<<<<<<<<<<<<<<<<<(((.((((..(((((........)))))..)).)).)))))}}}}}}}}}=}}}}}}}}}==.....))))..).)))....)))))).)))))))
tgttgttgacagaagatagagagc 1
ttgttgacagaagatagagag 9
ttgttgacagaagatagaga 1
tgttgacagaagatagagagc 11
tgttgacagaagatagagag 4
tgttgacagaagatagagagca 1
tgttgacagaagatagaga 1
tgttgacagaagatagagagcaca 2
tgttgacagaagatagagagcac 1
ttgacagaagatagagagcacag 2
ttgacagaagatagagagcaca 38
ttgacagaagatagagagca 211
ttgacagaagatagagagcacagat 1
ttgacagaagatagagag 4
ttgacagaagatagagagc 70
TTGACAGAAGATAGAGAGCAC 56612 miRNA
tgacagaagatagagagc 4
tgacagaagatagagagca 5
tgacagaagatagagagcaca 90
tgacagaagatagagagcac 2026
gacagaagatagagagcac 20
acagaagatagagagcac 3
acagaagatagagagcacag 3
cagaagatagagagcacagat 1
gatagagagcacagatgatgatat 1
gctctctatgcttctgtcatc 3
gctctctatgcttctgtcatca 1
ptc-miR156k
tagggcttgaatgagagggagagaagaagagaagaggtgtgaggttatgcatgcTGACAGAAGAGAGGGAGCACaaccctgtaatagctaaagagagtctttgcttttgttggactgtgctttctcttcttctgtcaccaaccaacacagtatcttctctctgatctgatgtgatccacta 67
(((((.(((.((.(((.((((((((((.........((((..(((......((.<<<<<<<<<<<<<--<<<<<(..((..(((.(((.((((.....))))))).)))..))..))))))..))).)))))))))).))))).))))....))))))))))..))).)).))).)).)))
ctgacagaagagagggagcac 1
tgacagaagagagggagcaca 3
TGACAGAAGAGAGGGAGCAC 62 miRNA
gacagaagagagggagcac 1
ptc-miR159b
tggagctccttgaagtccaatagaagctcctgctgggtagatcgagctgctgagctatgaatcccacagccctatcaccatcagtcattttgatgggcctgcggcttgcatatctcaggagctttattacctaatgttagatcttttTTTGGATTGAAGGGAGCTCTA 1114
(((((((((((..(((((((.(((((.((..(((((((((...(((((.(((((.((((....((.(((.(((((((.............))))))).))).))....)))).))))).)))))..)))))))..))..)).)))))->>>>>>>-->>>>>>>>>>>
agctccttgaagtccaatag 2
agctgctgagctatgaatcc 2
agctgctgagctatgaatccc 2
cttgcatatctcaggagcttt 6
ttgcatatctcaggagcttt 17
ttttggattgaagggagctc 1
TTTGGATTGAAGGGAGCTCTA 518 miRNA
tttggattgaagggagctc 33
tttggattgaagggagctct 510
tttggattgaagggagct 15
ttggattgaagggagctct 4
ttggattgaagggagctcta 3
tggattgaagggagctcta 1
ptc-miR160a
agaagaaggtgacatgggttaTGCCTGGCTCCCTGTATGCCAcaagcaaagaccaatcttttgttttagattggctgttgccggtggcgtgcgaggagccaagcatactctctctttctct 18
(((.(((((.((...((((.(<<<-<<<<<<<-<<<<<<<<<(..((((((.(((((((........))))))))).))))..)))}}}}}}}=}}}}}}}=}}}}}))))).))))))))
tgcctggctccctgtatgccac 1
TGCCTGGCTCCCTGTATGCCA 13 miRNA
ctccctgtatgccacaagcaaa 1
gcgtgcgaggagccaagcata 3
ptc-miR160b
accatgcatccatatatattatatgTGCCTGGCTCCCTGTATGCCAtttgcagagcccaacggatcctcgatggcctccgtggatggcgtatgaggagccatgcatattcgcatgtatattatacatggt 19
((((((.....((((((((...(((<<<-<<<<<<<--<<<<<<<<((..(.(((.(((.(((....))).))).))).)..))}}}}}}}}==}}}}}}}=}}})))....))))))))....))))))
TGCCTGGCTCCCTGTATGCCA 13 miRNA
ccgtggatggcgtatgaggagc 2
tggcgtatgaggagccatgca 1
gcgtatgaggagccatgcata 3
ptc-miR160c
ccatcatgcatccatatatattatatgTGCCTGGCTCCCTGTATGCCAtttgcagagcccaccggttcttcgatggcctccgtggatggcgtatgaggagccatgcatattcacatgtatatatccatggttttcacttgcagatgg 19
(((((.((((.((((((((((...(((<<<-<<<<<<<--<<<<<<<<((..(.(((.(((.(((....))).))).))).)..))}}}}}}}}==}}}}}}}=}}})))......)))))))....)))........)))))))))
TGCCTGGCTCCCTGTATGCCA 13 miRNA
ccgtggatggcgtatgaggagc 2
tggcgtatgaggagccatgca 1
gcgtatgaggagccatgcata 3
ptc-miR160d
gcatcgaagaaggaggtgaaatgggttaTGCCTGGCTCCCTGTATGCCAcagcaaagaccaatctcttctgtcttagattggctgctgccggtggcgtgcgaggagccaagcatactctctcctttctatctctatgt 17
((((.((.((((((((.((...((((.(<<<-<<<<<<<-<<<<<<<<<(.(((.((.(((((((..........)))))))))..)))..)))}}}}}}}=}}}}}}}=}}}}})))..)))))))).)))).))))
tgcctggctccctgtatgccac 1
TGCCTGGCTCCCTGTATGCCA 13 miRNA
gcgtgcgaggagccaagcata 3
ptc-miR162a
ggtggttgggaagacactggaggcagcggttcatcgatctcttcctggccaattttttgtttagcacgaaaaacatgaaccgaTCGATAAACCTCTGCATCCAGcgcttcctttattcccc 591
((.((..((((((.(.(((((.((((.((((.(((((((..(((.((.....((((((((.....)))))))))).)))..))>>>>>->>>>->>>>->>>>>.))))))).....))))
TCGATAAACCTCTGCATCCAG 585 miRNA
tcgataaacctctgcatcca 1
cgataaacctctgcatccag 1
gataaacctctgcatccag 4
ptc-miR162b
atgtaaagaagagattgcttttgagtttggttgagaagacactggaggcagcggttcatcgatcttttcctgaagatttttttgttttacacgaacaacacgaaccgaTCGATAAACCTCTGCATCCAGtgcttcccttactccacttttttttcttttcat 592
(((.((((((((((..(.....((((..((....((((.(((((((.((((.((((.(((((((..(((.((.........((((((.....)))))))).)))..))>>>>>->>>>->>>>->>>>>))))))))..))))..)..)))))))))).)))
tcgataaacctctgcatccagt 1
TCGATAAACCTCTGCATCCAG 585 miRNA
tcgataaacctctgcatcca 1
cgataaacctctgcatccag 1
gataaacctctgcatccag 4
ptc-miR164a
gggcgagcggttccttgcTGGAGAAGCAGGGCACGTGCAaaatcctgatgaagtgcttacactttgcacgcgctcttcttctccaacacgggctcctcacct 2513
(((.(((.(((.((.((.<<<<<<<<-<<<<<-<<<<<<(...........((((....)))))))}}}}=}}}}}=}}}}}}}}=}).))))).))).)))
ctggagaagcagggcacgtgca 3
tggagaagcagggcacgtgc 11
TGGAGAAGCAGGGCACGTGCA 2490 miRNA
tggagaagcagggcacgtg 3
tggagaagcagggcacgtgcaaa 3
tggagaagcagggcacgt 1
ggagaagcagggcacgtgca 1
cacgcgctcttcttctccaac 1
ptc-miR164d
gccaaccaagggaatggaattctgatgggtgggtggctcacgcTGGAGAAGCAGGGCACGTGCAaaatccttctcggcttccagatgctgatgaagcactctttgcacgtgctcccctcctccaacatgagttcctcacccctgtctctcttcagtctccattgctgaaagc 2512
((.......((.((((((...((((.(((((((..(((((.(.<<<<<-<<--<<<<<<<<<<<((...(((((((((........))))).)))).....)))))))))))))..)).))))).).)))))..)))))))..........))))..)))))).))....))
ctggagaagcagggcacgtgca 3
tggagaagcagggcacgtgc 11
TGGAGAAGCAGGGCACGTGCA 2490 miRNA
tggagaagcagggcacgtg 3
tggagaagcagggcacgtgcaaa 3
tggagaagcagggcacgt 1
ggagaagcagggcacgtgca 1
ptc-miR164e
aggtgtgtgtgagcaagaTGGAGAAGCAGGGCACGTGCAttactaactcatgcacacagagtgagagagacatttcttgctggagttatgactcttacctactatagattgtgttggcttcagcgagttagttcttcatgtgcctgtcttccccatcatgatcactaccacacct 2544
(((((((.((((.((.((<<<-<<<<--<<<<<<<<<--..((((((((.............((((((....))))))((((((((((..(((((..........)))..))..))))))))))))))))))....}}}}}}}}}==}}}}=}}}}}.)).))))...)))))))
atggagaagcagggcacgtgc 1
tggagaagcagggcacgtgc 11
tggagaagcagggcacgtgcatt 7
tggagaagcagggcacgtgcat 25
TGGAGAAGCAGGGCACGTGCA 2490 miRNA
tggagaagcagggcacgtg 3
tggagaagcagggcacgt 1
ggagaagcagggcacgtgca 1
agcagggcacgtgcattactaact 3
ttactaactcatgcacacaga 1
catgtgcctgtcttccccatc 1
ptc-miR166a
gaaatggaagctatttcttttgaggggaatgttgtctggctcgaggtcactaatgggatctatgattttatctcaattgattgattttcttttaaattctagtaaattgaattgagagatatcatgatcaacttatatttaatgatgTCGGACCAGGCTTCATTCCCCccaattgtttcttcctttc 143457
((((.(((((......(..(((.(({{{{{{=={{{{{{=={{{={(((..((((.((((.(((((....(((((((...(..((((.((..........)).))))..))))))))...)))))))))......))))...)))).>>>-->>>>>>-->>>>>>>>.)))..)...)))))))))
tttgaggggaatgttgtctgg 1
ggaatgttgtctggctcgagg 343
ggaatgttgtctggctcgag 2
ggaatgttgtctggctcgaggt 2
gaatgttgtctggctcgagg 1
atgtcggaccaggcttcattcccc 5
tgtcggaccaggcttcat 1
tgtcggaccaggcttcattcc 1
gtcggaccaggcttcattcccc 1
tcggaccaggcttcattcc 1030
tcggaccaggcttcattcccccc 6
tcggaccaggcttcattccccc 88
tcggaccaggcttcattccc 761
tcggaccaggcttcattc 425
TCGGACCAGGCTTCATTCCCC 140119 miRNA
cggaccaggcttcattcccc 72
cggaccaggcttcattcc 2
ggaccaggcttcattcccc 589
ggaccaggcttcattccc 8
ptc-miR166b
tctttctcctctttcgcatgtattaactgttgaggggattgctgtctggttcgatgtcattcatgtgaagctttaacattaatgtagtattgagtgattTCGGACCAGGCTTCATTCCCCccaactatatttgtttagcattcggagggtgtaataaga 144229
((((...(.(((((((.((((...(((.((((.(((((.((..(((((((((((.((((((((.(((..((.(((....))).))..))))))))))).>>>>>>>>>>>-->>->>>>>.)))).......)))..)))).))))))).)....))))
gatttcggaccaggcttcattcc 1
gatttcggaccaggcttcattccc 4
atttcggaccaggcttcattcccc 31
tttcggaccaggcttcattccc 2
tttcggaccaggcttcattcc 20
ttcggaccaggcttcattc 2
ttcggaccaggcttcattcccc 422
ttcggaccaggcttcatt 1
ttcggaccaggcttcattcc 20
ttcggaccaggcttcattccc 626
tcggaccaggcttcattcc 1030
tcggaccaggcttcattcccccc 6
tcggaccaggcttcattccccc 88
tcggaccaggcttcattccc 761
tcggaccaggcttcattc 425
TCGGACCAGGCTTCATTCCCC 140119 miRNA
cggaccaggcttcattcccc 72
cggaccaggcttcattcc 2
ggaccaggcttcattcccc 589
ggaccaggcttcattccc 8
ptc-miR166c
gggagcatctttttttgaggggaatgttgtctggctcgaggactctttcttgatcagtctgatcaagtgttctatctttagatctaatatcttagatcatgtgttagggtcgTCGGACCAGGCTTCATTCCCCccaattattgcttcc 143462
(((((((....(..(((.(({{{{{{=={{{{{{=={{{={(((((..(((((((.....))))))).............(((((((....))))))).......)))))).>>>-->>>>>>-->>>>>>>>.)))..).)))))))
tttgaggggaatgttgtctgg 1
ggaatgttgtctggctcgagg 343
ggaatgttgtctggctcgag 2
ggaatgttgtctggctcgagga 11
ggaatgttgtctggctcgaggac 1
gaatgttgtctggctcgagga 1
gaatgttgtctggctcgagg 1
tcgtcggaccaggcttcattc 1
gtcggaccaggcttcattcccc 1
tcggaccaggcttcattcc 1030
tcggaccaggcttcattcccccc 6
tcggaccaggcttcattccccc 88
tcggaccaggcttcattccc 761
tcggaccaggcttcattc 425
TCGGACCAGGCTTCATTCCCC 140119 miRNA
cggaccaggcttcattcccc 72
cggaccaggcttcattcc 2
ggaccaggcttcattcccc 589
ggaccaggcttcattccc 8
ptc-miR166d
gatatgcatgtgcgtgagttgaggggaatgttggctggctcgaagcttaagcaaagagttttctctcaagaaacaactgttaaggctTCGGACCAGGCTTCATTCCCCtcaaccaataaacttatgtatgcatttt 144322
((.((((((..((((((((((((({{{{{{=={={{{{=={{{{{(((.((((....(((((.......)))))...)))).)))))>>>-->>>>->-->>>>>>>>)))........)))))))))))))).))
ggaatgttggctggctcgaagc 1
ggaatgttggctggctcgaag 9
cttcggaccaggcttcattcccc 1
cttcggaccaggcttcattcc 16
ttcggaccaggcttcattc 2
ttcggaccaggcttcattcccc 422
ttcggaccaggcttcatt 1
ttcggaccaggcttcattcc 20
ttcggaccaggcttcattccc 626
tcggaccaggcttcattcc 1030
tcggaccaggcttcattccc 761
tcggaccaggcttcattc 425
tcggaccaggcttcattcccct 216
TCGGACCAGGCTTCATTCCCC 140119 miRNA
cggaccaggcttcattcccc 72
cggaccaggcttcattcccct 1
cggaccaggcttcattcc 2
ggaccaggcttcattcccc 589
ggaccaggcttcattcccct 1
ggaccaggcttcattccc 8
ptc-miR166e
cctcaccccatctctccctctcgcgtattaactgttgaggggattgtcgtctggttcgatgtcattcatgagaagctcaaacataaacgtaatattgaatgattTCGGACCAGGCTTCATTCCCCccaacaatgtttgattagcgttcacagaatggattgagg 144237
(((((..((((.(((......(((.....((((((((.(({{{={{=={{{{{{{{{{{={(((((((.(((...)))..((......)).....)))))))).>>>>>>>>>>>-->>->>>>>.)))))..)))......))).....)))))))..)))))
ggattgtcgtctggttcgatg 1
ggattgtcgtctggttcgatgt 1
gattgtcgtctggttcgatgt 2
gattgtcgtctggttcgatgtcat 1
gattgtcgtctggttcgatg 1
gattgtcgtctggttcgatgtcatt 1
tgaatgatttcggaccaggct 1
gatttcggaccaggcttcattcc 1
gatttcggaccaggcttcattccc 4
atttcggaccaggcttcattcccc 31
tttcggaccaggcttcattccc 2
tttcggaccaggcttcattcc 20
ttcggaccaggcttcattc 2
ttcggaccaggcttcattcccc 422
ttcggaccaggcttcatt 1
ttcggaccaggcttcattcc 20
ttcggaccaggcttcattccc 626
tcggaccaggcttcattcc 1030
tcggaccaggcttcattcccccc 6
tcggaccaggcttcattccccc 88
tcggaccaggcttcattccc 761
tcggaccaggcttcattc 425
TCGGACCAGGCTTCATTCCCC 140119 miRNA
cggaccaggcttcattcccc 72
cggaccaggcttcattcc 2
ggaccaggcttcattcccc 589
ggaccaggcttcattccc 8
ptc-miR166f
aaggtgtgtgggtgtgttgaggggaatgttggctggctcgaagcttaagcaaagagtttcctaacatgaaacaactgttaaggctTCGGACCAGGCTTCATTCCCCtcaaacatacaagcttatttt 144323
((((((.((..((((((((((({{{{{{=={={{{{=={{{{{(((.((((....(((((.......)))))...)))).)))))>>>-->>>>->-->>>>>>>>)).)))))))..)).))))))
ggaatgttggctggctcgaagc 1
ggaatgttggctggctcgaag 9
tgaaacaactgttaaggcttcgga 1
cttcggaccaggcttcattcccc 1
cttcggaccaggcttcattcc 16
ttcggaccaggcttcattc 2
ttcggaccaggcttcattcccc 422
ttcggaccaggcttcatt 1
ttcggaccaggcttcattcc 20
ttcggaccaggcttcattccc 626
tcggaccaggcttcattcc 1030
tcggaccaggcttcattccc 761
tcggaccaggcttcattc 425
tcggaccaggcttcattcccct 216
TCGGACCAGGCTTCATTCCCC 140119 miRNA
cggaccaggcttcattcccc 72
cggaccaggcttcattcccct 1
cggaccaggcttcattcc 2
ggaccaggcttcattcccc 589
ggaccaggcttcattcccct 1
ggaccaggcttcattccc 8
ptc-miR166h
tgattgctacacagttgaggggaatgctgtctgattcgagaccattcactttaagcacacattcatctttcgaatgatcTCGGACCAGGCTTCATTCCCCccaactcaaaatca 161538
(((((.......(((((.((((((((..(((((.(((((((.(((((........................))))).))>>>>>->>>>>-->>>>>>>>.)))))...)))))
gatctcggaccaggcttcattcccc 1
atctcggaccaggcttcat 1
atctcggaccaggcttcattcccc 2
atctcggaccaggcttcattc 4
atctcggaccaggcttcattcc 8
tctcggaccaggcttcattcccc 1
tctcggaccaggcttcattcc 18066
tctcggaccaggcttcattc 162
tctcggaccaggcttcatt 41
tctcggaccaggcttcat 66
tctcggaccaggcttcattccc 1
ctcggaccaggcttcattcccc 69
ctcggaccaggcttcatt 1
ctcggaccaggcttcattcc 5
ctcggaccaggcttcattccc 10
tcggaccaggcttcattcc 1030
tcggaccaggcttcattcccccc 6
tcggaccaggcttcattccccc 88
tcggaccaggcttcattccc 761
tcggaccaggcttcattc 425
TCGGACCAGGCTTCATTCCCC 140119 miRNA
cggaccaggcttcattcccc 72
cggaccaggcttcattcc 2
ggaccaggcttcattcccc 589
ggaccaggcttcattccc 8
ptc-miR166i
ggaagcttgtcttttgaggggaatgttgtttggttcaaggcctggccaccccatgtcttggaatttaaaatatcatgtccTCGGACCAGGCTTCATTCCCCtcaattactgcttcc 143316
((((((..((...(((((({{{{{{=={{{{{{{{{={{{(.(((.....))).)))).(((...............)))-->>>>>>>>>-->>>>>>>>))))..)).))))))
ggaatgttgtttggttcaagg 1
cctcggaccaggcttcattcc 6
ctcggaccaggcttcattcccc 69
ctcggaccaggcttcatt 1
ctcggaccaggcttcattcc 5
ctcggaccaggcttcattccc 10
tcggaccaggcttcattcc 1030
tcggaccaggcttcattccc 761
tcggaccaggcttcattc 425
tcggaccaggcttcattcccct 216
TCGGACCAGGCTTCATTCCCC 140119 miRNA
cggaccaggcttcattcccc 72
cggaccaggcttcattcccct 1
cggaccaggcttcattcc 2
ggaccaggcttcattcccc 589
ggaccaggcttcattcccct 1
ggaccaggcttcattccc 8
ptc-miR166j
ggtagcttcttttttgaggggaatgttgtctggctcgaggactttttgttcatcaatctaatcgaactttctacctgtagatctagtatcttatttaagattgatcacgtattagggttgTCGGACCAGGCTTCATTCCCCccaatcattgcttcc 143463
((.(((.......(((.(({{{{{{=={{{{{{=={{{={(((((.(((..((((((((((..(((((.((((....))))...))).))....)).)))))))).)))....)))))).>>>-->>>>>>-->>>>>>>>.))).....))).))
tttgaggggaatgttgtctgg 1
ggaatgttgtctggctcgagg 343
ggaatgttgtctggctcgag 2
ggaatgttgtctggctcgagga 11
ggaatgttgtctggctcgaggac 1
gaatgttgtctggctcgagga 1
gaatgttgtctggctcgagg 1
tgtcggaccaggcttcat 1
tgtcggaccaggcttcattcc 1
gtcggaccaggcttcattcccc 1
tcggaccaggcttcattcc 1030
tcggaccaggcttcattcccccc 6
tcggaccaggcttcattccccc 88
tcggaccaggcttcattccc 761
tcggaccaggcttcattc 425
TCGGACCAGGCTTCATTCCCC 140119 miRNA
cggaccaggcttcattcccc 72
cggaccaggcttcattcc 2
ggaccaggcttcattcccc 589
ggaccaggcttcattccc 8
ptc-miR166k
ggtagcttcttttttgaggggaatgttgtctggctcgaggactttttgttcatcaatctaatcgaactttctacctgtagatctagtatcttatttaagattgatcacgtattagggttgTCGGACCAGGCTTCATTCCCCccaatcattgcttcc 143463
((.(((.......(((.(({{{{{{=={{{{{{=={{{={(((((.(((..((((((((((..(((((.((((....))))...))).))....)).)))))))).)))....)))))).>>>-->>>>>>-->>>>>>>>.))).....))).))
tttgaggggaatgttgtctgg 1
ggaatgttgtctggctcgagg 343
ggaatgttgtctggctcgag 2
ggaatgttgtctggctcgagga 11
ggaatgttgtctggctcgaggac 1
gaatgttgtctggctcgagga 1
gaatgttgtctggctcgagg 1
tgtcggaccaggcttcat 1
tgtcggaccaggcttcattcc 1
gtcggaccaggcttcattcccc 1
tcggaccaggcttcattcc 1030
tcggaccaggcttcattcccccc 6
tcggaccaggcttcattccccc 88
tcggaccaggcttcattccc 761
tcggaccaggcttcattc 425
TCGGACCAGGCTTCATTCCCC 140119 miRNA
cggaccaggcttcattcccc 72
cggaccaggcttcattcc 2
ggaccaggcttcattcccc 589
ggaccaggcttcattccc 8
ptc-miR166l
gctagctaggaagcttaacttttgtggtgaatgttgtctggttcaaggcatggccaccacatctcttggtgaatatatgtccTCGGACCAGGCTTCATTCCCCtcaattaatgcttccatacatgc 143315
((......((((((((((...(((.((.(((((..(((((((((.(((((((..(((((.......)))))....)))).))>->>>>>>>>>-->>>>>->>.))))))).))))))......))
cctcggaccaggcttcattcc 6
ctcggaccaggcttcattcccc 69
ctcggaccaggcttcatt 1
ctcggaccaggcttcattcc 5
ctcggaccaggcttcattccc 10
tcggaccaggcttcattcc 1030
tcggaccaggcttcattccc 761
tcggaccaggcttcattc 425
tcggaccaggcttcattcccct 216
TCGGACCAGGCTTCATTCCCC 140119 miRNA
cggaccaggcttcattcccc 72
cggaccaggcttcattcccct 1
cggaccaggcttcattcc 2
ggaccaggcttcattcccc 589
ggaccaggcttcattcccct 1
ggaccaggcttcattccc 8
ptc-miR166m
aagggcgtgttgttttaggaaagtgaggatgtgggggaatgtcgtctgactcgagacaacaggtaaactgaaggaatggccggagtttaagagttctcTCGGACCAGGCTTCATTCCCCtcatccacaccttctcctcctcgacctt 161674
((((.((.(..(.....((((.(((.(((((.(((({{{{{=={{{{{=={{{{{{=(((...((((((...((.....))..))))))...))).))>>>>-->>>>>-->>>>>>>>)))))).))).)))).)..).)).))))
gaggatgtgggggaatgtcgtctga 1
gaggatgtgggggaatgtcgtc 6
aggatgtgggggaatgtcgtctg 1
aggatgtgggggaatgtcgtctgac 1
gaatgtcgtctgactcgagac 1
ctctcggaccaggcttcattc 1
ctctcggaccaggcttcattcc 17
tctcggaccaggcttcattcccc 1
tctcggaccaggcttcattcc 18066
tctcggaccaggcttcattc 162
tctcggaccaggcttcatt 41
tctcggaccaggcttcat 66
tctcggaccaggcttcattccc 1
ctcggaccaggcttcattcccc 69
ctcggaccaggcttcatt 1
ctcggaccaggcttcattcc 5
ctcggaccaggcttcattccc 10
tcggaccaggcttcattcc 1030
tcggaccaggcttcattccc 761
tcggaccaggcttcattc 425
tcggaccaggcttcattcccct 216
TCGGACCAGGCTTCATTCCCC 140119 miRNA
cggaccaggcttcattcccc 72
cggaccaggcttcattcccct 1
cggaccaggcttcattcc 2
ggaccaggcttcattcccc 589
ggaccaggcttcattcccct 1
ggaccaggcttcattccc 8
ptc-miR167a
tcgtgcaccactagcagtTGAAGCTGCCAGCATGATCTAActtccttgcttctttatcaaggatggatttagatcatgtggtggtttcacctgttgatggcaccacgg 1688
(((((..(((.((((((.<<<<<<--<<<-<<<<<<<<<<((((((((.........)))))).))..}}}}}}}}}}}}}==}}}}}}.)))))).)))...)))))
tgaagctgccagcatgatct 39
TGAAGCTGCCAGCATGATCTAA 1167 miRNA
tgaagctgccagcatgatc 36
tgaagctgccagcatgatcta 416
tgaagctgccagcatgat 28
gaagctgccagcatgatctaa 1
ttagatcatgtggtggtttca 1
ptc-miR167b
gttcactagggaaaaagTGAAGCTGCCAGCATGATCTAtctttggttagagaaagaaaggactaaccctagctaggtcatgctgtgacagcctcactccttcctatttggggac 561
((((.((((((((..((<<<-<<<<<<<<<<<<<<<<<.((..((((((............))))))..)).)))))))))))).).)))).)))))..)))))...)))))))
tgaagctgccagcatgatctat 40
tgaagctgccagcatgatct 39
tgaagctgccagcatgatc 36
TGAAGCTGCCAGCATGATCTA 416 miRNA
tgaagctgccagcatgat 28
cctagctaggtcatgctgtgacagc 1
ggtcatgctgtgacagcctcact 1
ptc-miR167c
gttgatcatctctcgtgcaccactagcagtTGAAGCTGCCAGCATGATCTAAattaacctccttctttatcaaggatggattagatcatgtggtagtttcacctgctgatggcatcacgaaaaaaccctagc 1696
((((........(((((..(((.((((((.<<<<<<<<<<<-<<<<<<<<<<.....(((((((.......))))).)).}}}}}}}}}}}}}}}}}}}}}.)))))).)))...)))))........))))
tgaagctgccagcatgatct 39
TGAAGCTGCCAGCATGATCTAA 1167 miRNA
tgaagctgccagcatgatctaaa 2
tgaagctgccagcatgatc 36
tgaagctgccagcatgatcta 416
tgaagctgccagcatgat 28
gaagctgccagcatgatctaa 1
attagatcatgtggtagtttcacc 1
ttagatcatgtggtagtttca 2
agatcatgtggtagtttcacc 2
gatcatgtggtagtttca 1
tcatgtggtagtttcacctgc 1
ptc-miR167d
gtggttaaaagaagttcacaagggaaaaggTGAAGCTGCCAGCATGATCTAtctttggttagagaaggatagaagcgaaagaactaaccctagctaggtcatgctctgacagcctcactccttcctatttggggacccat 559
((((.........((((.((((((((..((<<<-<<<<<-<<<<<<<<<<<.((..((((((.............(....)..))))))..)).)))))))))))..).)))).)))))..)))))..))).))))))))
tgaagctgccagcatgatctat 40
tgaagctgccagcatgatct 39
tgaagctgccagcatgatc 36
TGAAGCTGCCAGCATGATCTA 416 miRNA
tgaagctgccagcatgat 28
ptc-miR167e
gagcggatagacctaatcatgcaccactagtagtTGAAGCTGCCAGCATGATCTGAactttccttaattttcctatacgggaaagactagatcatgtggtagtttcatctattgatggtagcatgggaaaccctaatcagctt 1754
((((.(((((......((((((((((.((((((.<<<<<<<<<<<-<<<<<<<<<-.(((((((..............)))))))==}}}}}}}}}}}}}}}}}}}}.)))))).)))).))))))......)).))).))))
tgaagctgccagcatgatctgaac 27
tgaagctgccagcatgatct 39
tgaagctgccagcatgatctg 737
tgaagctgccagcatgatc 36
tgaagctgccagcatgatctgaa 28
tgaagctgccagcatgat 28
TGAAGCTGCCAGCATGATCTGA 802 miRNA
aagctgccagcatgatctgaact 2
aagctgccagcatgatctgaac 21
actagatcatgtggtagtttcatc 9
actagatcatgtggtagtttca 1
ctagatcatgtggtagtt 1
ctagatcatgtggtagtttc 2
ctagatcatgtggtagtttca 5
agatcatgtggtagtttcatc 5
gatcatgtggtagtttca 1
gatcatgtggtagtttcatc 10
ptc-miR167f
tcgtgcacctctatcagtTGAAGCTGCCAGCATGATCTTAgccttcctcctttgttgaggaaagaaacagatcatgtggcagtttcacctgttgttggtatcacga 2823
(((((.(((..((.(((.<<<<<<<<<<<-<<<<<<<<--.(.((((((.......)))))).)..==}}}}}}}}}}}}}}}}}}).))).))..)))..)))))
ttgaagctgccagcatgatctta 1
ttgaagctgccagcatgatctt 1
tgaagctgccagcatgatctt 205
tgaagctgccagcatgatct 39
tgaagctgccagcatgatc 36
tgaagctgccagcatgat 28
TGAAGCTGCCAGCATGATCTTA 2471 miRNA
acagatcatgtggcagtttc 1
agatcatgtggcagtttcacc 39
agatcatgtggcagtttcac 1
agatcatgtggcagtttcacct 1
ptc-miR167g
tcgtgcaccactatcagtTGAAGCTGCCAGCATGATCTTAacctccctcctttgtcgaggaaagaacagatcatgtggcagtttcacctgaagttggtatcacga 2825
(((((.((((((.((((.<<<<<<<<<<<-<<<<<<<<--.....((((.......)))).....==}}}}}}}}}}}}}}}}}}).)))))).))))..)))))
ttgaagctgccagcatgatctta 1
ttgaagctgccagcatgatctt 1
tgaagctgccagcatgatctt 205
tgaagctgccagcatgatct 39
tgaagctgccagcatgatcttaa 2
tgaagctgccagcatgatc 36
tgaagctgccagcatgat 28
TGAAGCTGCCAGCATGATCTTA 2471 miRNA
acagatcatgtggcagtttc 1
agatcatgtggcagtttcacc 39
agatcatgtggcagtttcac 1
agatcatgtggcagtttcacct 1
ptc-miR168a
ttaccggcggtctctgatTCGCTTGGTGCAGGTCGGGAActgattcggcgatttgattgccagatggctcgacatgactggttgttgtggaaaaagaaaaggaaggaaacaggaaaaaaaacaaagaatagcgaattggatcccgccttgcatcaactgaatcggaggccgcggtga 2790
((((((.(((((((((((<<<-<<<<<<<<<<-<<<<<-(..(((((.(..((((...(((....)))....((..((.....))..))...............(....)...........)))).....))))))==}=}}}}}=}}}}}}}}}}=))))))))))))))))))))
tcgcttggtgcaggtcgggaac 1
tcgcttggtgcaggtcggga 5
TCGCTTGGTGCAGGTCGGGAA 2680 miRNA
cgcttggtgcaggtcgggaa 13
gcttggtgcaggtcgggaa 9
cttggtgcaggtcgggaactg 2
ttggatcccgccttgcatcaa 1
tggatcccgccttgcatcaac 1
gatcccgccttgcatcaactgaat 5
cccgccttgcatcaactgaat 69
cgccttgcatcaactgaatcgg 3
ccttgcatcaactgaatcgg 1
ptc-miR168b
ttaccggcggtctctaatTCGCTTGGTGCAGGTCGGGAActgattcggcgatttgattgccagatggctaaacacgattggctgtgaggcaaattataaaaagaaagagaattggatcccgccttgcatcaactgaatcggagaccgcggtga 2792
((((((.(((((((..((<<<-<<<<<<<<<<-<<<<<-(..((((..(....((((((((..((((((((......))))))))..))).)))))......).....))))==}=}}}}}=}}}}}}}}}}=)))))..)))))))))))))
aattcgcttggtgcaggtcggg 1
aattcgcttggtgcaggtcgg 1
tcgcttggtgcaggtcgggaac 1
tcgcttggtgcaggtcggga 5
TCGCTTGGTGCAGGTCGGGAA 2680 miRNA
cgcttggtgcaggtcgggaa 13
gcttggtgcaggtcgggaa 9
cttggtgcaggtcgggaactg 2
ttggatcccgccttgcatcaa 1
tggatcccgccttgcatcaac 1
gatcccgccttgcatcaactgaat 5
cccgccttgcatcaactgaat 69
cgccttgcatcaactgaatcgg 3
ccttgcatcaactgaatcgg 1
ptc-miR169a
gcacaaagtggtatgCAGCCAAGGATGACTTGCCGActtaactgatctgtataaattaatgcatgtgtagtcaaaattactactactatatattaatctgatctgtgaccacaaattaactaactactagctagtaattagttggcaagttgtccatggctacatgctgctttttgc 87
(((.((((..(((((-<<<<<-<<<--<<<<<<<<<((..((((....(((...(((((((.(((((((((.......))))).)).)).))))))).((((.(((....))).))))......)))....))))....)))))))))))..))).))))).)))))..)))).)))
tgcagccaaggatgacttgcc 1
tgcagccaaggatgacttgccgac 1
cagccaaggatgacttgccg 5
CAGCCAAGGATGACTTGCCGA 79 miRNA
agccaaggatgacttgcc 1
ptc-miR169aa
tcttgagtgtcttccatgaaaacataaagagtagagaTCGAGCCAAGAATGACTTGTCGgcaggctagcaattgctacgtatagagcaatatgtatgctagaatgagtattccgccaggtcgttcttggctcaactttgctcttcgttttctcatgcgagcctctcaaga 511
(((((((.(.(((.(((((.((.(..((((((((((.--<<<<<<<<<<<<<<<<<-<<(((..((((((((((((.(.....))))))).....))))))..))......))).)))))))))))))))))..))))))))))..).)).))))).))).).)))))))
tgaaaacataaagagtagag 1
ataaagagtagagatcgagccaag 2
aaagagtagagatcgagccaag 1
aagagtagagatcgagccaaga 2
agagtagagatcgagccaag 2
agagtagagatcgagccaagaatga 1
gagtagagatcgagccaagaatgac 1
gagtagagatcgagccaagaatg 1
gagtagagatcgagccaagaat 3
agtagagatcgagccaagaatg 1
agagatcgagccaagaatgact 1
gatcgagccaagaatgacttgt 4
atcgagccaagaatgacttgt 3
tcgagccaagaatgacttgt 3
tcgagccaagaatgacttgtcgg 9
TCGAGCCAAGAATGACTTGTCG 172 miRNA
tcgagccaagaatgactt 1
tcgagccaagaatgacttgtc 3
tcgagccaagaatgacttgtcggc 19
tcgagccaagaatgacttg 9
tcgagccaagaatgacttgtcggca 1
cgagccaagaatgacttgtcgg 1
cgagccaagaatgacttgt 1
cgagccaagaatgacttgtcg 3
cgagccaagaatgacttgtcggc 1
gagccaagaatgacttgtcg 3
agccaagaatgacttgtcggc 2
agccaagaatgacttgtcggca 34
gccaagaatgacttgtcggca 45
gccaagaatgacttgtcggc 1
ccaagaatgacttgtcggcaggc 1
ccaagaatgacttgtcggca 3
caagaatgacttgtcggcagg 1
aagaatgacttgtcggcaggc 2
agaatgacttgtcggcaggct 5
agaatgacttgtcggcaggc 2
ccaggtcgttcttggctcaa 1
ccaggtcgttcttggctcaac 130
ccaggtcgttcttggctcaact 33
caggtcgttcttggctcaac 1
cttggctcaactttgctcttc 1
ptc-miR169c
gccttgcatggaggctcataaagtttgatgCAGCCAAGGATGACTTGCCGAcgactcaatttttgcttccatatggtagaagagatgaataggttggcaggttttccttggctacattttcctttctgctcctcctgctaggt 89
((((.(((.(((((..((.((((...((((-<<<<<<<<<-<<<<<<<<<<(.(.(((.(((((.((.((....)).))))))).))).)..))))))))))).))))))))).))))...)))).))..)))))))).))))
tgcagccaaggatgacttgcc 1
tgcagccaaggatgacttgccgac 1
cagccaaggatgacttgccg 5
CAGCCAAGGATGACTTGCCGA 79 miRNA
cagccaaggatgacttgccgacg 1
agccaaggatgacttgcc 1
gcaggttttccttggctac 1
ptc-miR169d
ggtctaggagttttgcatgaagaggtagagagtcgaatgCAGCCAAGGATGACTTGCCGGcatttcctcctaagtagcgagcccggcaaggcttctatttggcacgcccggccggcgggttgtccttggctatatttggttcccttcttctcatgtgaaactccaggcc 15
(((((.(((((((..(((((.((((.((.((..((((((-<<<<<<<<<--<<<<<<<<<(........((((((((.(((((......)))))))))))))........))))))))))..))))))))).))))))..)).)).)))))))))..))))))))))))
tgcagccaaggatgacttgcc 1
cagccaaggatgacttgccg 5
CAGCCAAGGATGACTTGCCGG 8 miRNA
agccaaggatgacttgcc 1
ptc-miR169g
ggtgtaggggttttgcatgaagaggtagagagtagaatgCAGCCAAGGATGACTTGCCGGcatttcctcctaggtagctagcaagccttctatttggcatgcctgtccggcaggttgtccttggctaaattttgttctcttcttctcatgtgagactccaggcc 15
(((.(.(((((((..(((((.((((.((((((((((((.-<<<<<<<<<--<<<<<<<<<((...((.....))......(((.(((........))).))).)).)))))))))..)))))))))..)))))))))))).)))))))))..)))))))).)))
tgcagccaaggatgacttgcc 1
cagccaaggatgacttgccg 5
CAGCCAAGGATGACTTGCCGG 8 miRNA
agccaaggatgacttgcc 1
ptc-miR169i
gaggaagagaggcctagcatgaaggtaaagagtcttgtttggTAGCCAAGGATGACTTGCCTGctccattgtaggaggtttccgaaaaaatgcagacatgtataatttcgaaacccctgtttcgtttcaggcagtctccttggctaacttgactggctctttcctgccatgctatgcccttctcttcttc 19
(((((((((((((.(((((((.(((.((((((((..(((.((<<<<<<<<<<-<<<<-<<<<<........((((.((((((.((((..(((((....)))))..))))))))))))))........))}}}}}}}}}}}}}}}}=}}}.))).)))))))))))..))))))).)))..))))))))))
TAGCCAAGGATGACTTGCCTG 17 miRNA
agccaaggatgacttgcc 1
ggcagtctccttggctaact 1
ptc-miR169n
atcttgcatgaagtgatagagagtggattTGAGCCAAGGATGACTTGCCGcagatgcatggtccttgctgctgatcacataccaaggggggttttgggtggcaagcatccttggttctccttcgctctgtatttcctcatgcgagat 122
(((((((((((.(.((((.((((((((..-<<<<<<<<<<<<-<<<<<<<(.((.((....((((((.((.((....)))).))))))..)).))..))))))))))))))))))))...)))))))).)))).).)))))))))))
tgaagtgatagagagtggatt 23
tgaagtgatagagagtggat 1
tagagagtggatttgagccaa 1
agagagtggatttgagccaag 3
gtggatttgagccaaggatga 3
tgagccaaggatgacttgccgc 10
TGAGCCAAGGATGACTTGCCG 73 miRNA
agccaaggatgacttgcc 1
gcaagcatccttggttctcct 1
gcaagcatccttggttctcc 5
gcaagcatccttggttctc 1
ptc-miR169q
gagacctaacatgaaaataagagtcttgttagtTAGCCAAGGACGACTTGCCTGttcctagcaatttgggatttgccctggactaagaggcaggaccctcattccgggtttcaggcagtctccttggctaggttgacaggctcttctttgtcatgccaggcctt 28
(((.(((..((((((((.((((((((.((((.(<<<<<<<<<<-<<<<-<<<<<..((..(.(((..(((.((((((((......)).)))))).)))..))))..))...)))))))))))))))))))).).))))))))))).))).)))))..))).)))
tagccaaggacgacttgcctgt 9
TAGCCAAGGACGACTTGCCTG 13 miRNA
tagccaaggacgacttgcc 2
tagccaaggacgacttgcct 4
ptc-miR169s
ttgccttgggggcttgcatgaagaggtagagagtgtgattCAGCCAAGGATGACTTGCCGGcagcaggtaagagcaaagctccgtttttggaagttcaaggatatcttaacttttccggccggcaagctgtccttggctacattgtactctcttcttctcatgcaagaactacttggtaa 27
(((((...((..(((((((((.((((.((((((((..((.-<<<<<<<<<<--<<<<<<<<(....((.(((((..(((....((((((((....))))))))..)))..))))))).)))}}}}}}==}}}}}}}}}}==))..)))))))).)))))))))))))..))....)))))
atgaagaggtagagagtgtgat 1
tgaagaggtagagagtgtg 1
tgaagaggtagagagtgtgatt 5
tgaagaggtagagagtgtga 1
cagccaaggatgacttgccg 5
CAGCCAAGGATGACTTGCCGG 8 miRNA
agccaaggatgacttgcc 1
ggcaagctgtccttggctac 2
tggctacattgtactctcttc 2
ttgtactctcttcttctcatg 1
ptc-miR169u
ggaagagaggtcttgtatgaagatgaagaggtagagagtttggTAGCCAAGGACGACTAGCCTAtttcctccattgggttctcaaaagaatgaaatgtcgttcagagctcactggtagggttcataggcagtctcctttggctatcctaactggctctcatttttcatgctagacctacatctcttct 1865
(((((((((((((.((((((((((((.(((.(((..((...((<<<<<<<<<<-<<<<-<<<<<(.(((((((.((((((((.....((((((....)))))))))))))).))).))))...))}}}}}}}}}}}=}}}}}}}}}))..))).)))))).))))))))).)))))....))))))))
tagccaaggacgactagcc 31
tagccaaggacgactagcctatt 4
tagccaaggacgactagcct 13
tagccaaggacgactagcctattt 3
tagccaaggacgactagcctat 28
TAGCCAAGGACGACTAGCCTA 1762 miRNA
agccaaggacgactagccta 1
gccaaggacgactagccta 1
cagagctcactggtagggttc 1
taggcagtctcctttggctatc 19
aggcagtctcctttggctatc 2
ptc-miR171a
gtttcttcagagaaaacgggatattggtacggttcaatcagaaagtaatgctcccaaaagtatagagtactattgttTGATTGAGCCGTGCCAATATCacgtacactcatcttcctctcgaggaac 85
(((((((.((((.(((((={{{{{{{{{{{{{{{{{{{{(((.((((.(((((...........))))).)))).))>>>>>>>>>>>>>>>>>>>>>.))).........)).)))).)))))))
acgggatattggtacggttcaatc 2
acgggatattggtacggttcaa 1
ggatattggtacggttcaa 1
ggatattggtacggttcaatc 17
tgattgagccgtgccaata 4
TGATTGAGCCGTGCCAATATC 59 miRNA
ttgagccgtgccaatatcac 1
ptc-miR171b
gtcaacataattatatataacgagatattggtgcggttcaatcagatagtaatgctccataagcatagagctctattgttTGATTGAGCCGTGCCAATATCacgtatatgttgc 67
(.(((((((..........(((.((((((((..((((((((((((((((((..((((.((....)).))))..)))))))>>>>>>>>>>>-->>>>>>>>.))).))))))))
acgagatattggtgcggttcaatc 1
agatattggtgcggttcaatca 1
tctattgtttgattgagccgtgcc 1
tgattgagccgtgccaata 4
TGATTGAGCCGTGCCAATATC 59 miRNA
ttgagccgtgccaatatcac 1
ptc-miR171e
aatttgatgttggcagagctcaatcaaatcaaagcactcaatggttgggttctttcatcTGATTGAGCCGTGCCAATATCgcatt 63
(((.(((((((((((..(((((((((.((.((((.(((((.....))))).)))).)).>>>>>>>>>-->>>>>>>>>>).)))
tgattgagccgtgccaata 4
TGATTGAGCCGTGCCAATATC 59 miRNA
ptc-miR171f
gtgcttgaaagtgtcattgcgatgttggcccggttcactcagagaaaagacaccattttttttcaagaagatcatcaaagcttgaaagaataatggtggtcggtcgtctcTGATTGAGCCGTGCCAATATCttagtgctctttcatttat 71
(((..((((((.(.(((((.(((((((((.(((((((.(((((((...(((((((((((((((((((..(.....)....)))))))))).)))))).))).....))))>>>->>>>>>>->>>>>>>>>.)))))).))))))..)))
tgttggcccggttcactcagagaa 4
tgttggcccggttcactcag 1
tctctgattgagccgtgccaa 3
tgattgagccgtgccaata 4
TGATTGAGCCGTGCCAATATC 59 miRNA
ptc-miR171l
ggagaagtagacacggtgtgatattggtccggctcatcttctgtgcataagcatctgaagttcttcactcatgaagaCGAGCCGAATCAATATCACTCttgtatgcttcttc 83
(((((((((.(((.((={{{{{{{{{{{={{{{{{==((((.((((....))))..)))).((((((....))))))->>>>>>->>>>>>>>>>>->)))).)))))))))
tgtgatattggtccggctcatct 2
tgtgatattggtccggctcat 3
tgtgatattggtccggctcatc 21
tgtgatattggtccggctca 2
cgagccgaatcaatatcac 2
cgagccgaatcaatatcactct 1
CGAGCCGAATCAATATCACTC 52 miRNA
ptc-miR171m
ggagaagcagacatggcgtggtattgatccggctcatcttctgtatttgcatcagaagttcttcgctgaagaCGAGCCGAATCAATATCACTCttgtacgcttcattc 59
((((((((..(((.((.(((((((((((.((((((..((((((.........)))))).(((((...)))))->>>>>>->>>>>>>>>>>->))))..))))).)))
cgtggtattgatccggctcatct 1
cgtggtattgatccggctcatc 1
ttgatccggctcatcttctgt 1
tttgcatcagaagttcttcgct 1
cgagccgaatcaatatcac 2
cgagccgaatcaatatcactct 1
CGAGCCGAATCAATATCACTC 52 miRNA
ptc-miR171n
ttggagaagcagacatggcgtggtattgatccggctcttcttctgtatttgcatcagaagtttttcgctgaagaCGAGCCGAATCAATATCACTCttgtacgcttcattctctaa 55
((((((((((..(((.((.(((((((((((.((((((.(((((.((....((.......)).....)).)))))->>>>>>->>>>>>>>>>>->))))..)))....)))))))
cgagccgaatcaatatcac 2
cgagccgaatcaatatcactct 1
CGAGCCGAATCAATATCACTC 52 miRNA
ptc-miR172b
tcgttgtttgcgggtggagcatcatcaagattcacatgcaaatgcacggccggtgatgttaagagttaaatctttctttgtttctgttcatctgccaaagttctttggaagtgAGAATCTTGATGATGCTGCATcggcaataaacga 9387
(((((..((((.((({={{{{{{{{{{{{{{{{={{(.((((.((..(((.(((((.....((((.((((......)))).))))..))))).)))...))..))))...)))->>>>>>>>>>>>>>>>->>>).))))..)))))
tttgcgggtggagcatcatca 4
tgcgggtggagcatcatcaag 1
ggagcatcatcaagattca 1
ggagcatcatcaagattcaca 1
ggagcatcatcaagattcac 2
gagcatcatcaagattcacat 1
agcatcatcaagattcacat 1
gtgagaatcttgatgatgctgcat 17
tgagaatcttgatgatgctgcat 4
gagaatcttgatgatgctgca 10
gagaatcttgatgatgctgcat 3
agaatcttgatgatgctgcatc 1
agaatcttgatgatgctgc 3
AGAATCTTGATGATGCTGCAT 9265 miRNA
agaatcttgatgatgctgca 66
gaatcttgatgatgctgcat 4
cttgatgatgctgcatcggca 1
ttgatgatgctgcatcggcaa 2
ptc-miR172c
agtcattgtttgcaggtgcagcatcatcaagattcacattcaaacagatgtacggcagctagctagctagatagatagacagcaatgtatttctttgaaggtgAGAATCTTGATGATGCTGCATcagccataaatgact 9395
(((((((....((.((({{{{{{{{{{{{{{{{{{{{=(((((..(((.(((((...(((..(((.((....)).)))..)))..))))).)))))))).)))>-->>>>>>>>>>>>>>>>>>).))....)))))))
gcagcatcatcaagattcac 10
gcagcatcatcaagattcaca 5
cagcatcatcaagattcaca 1
cagcatcatcaagattcacat 3
agcatcatcaagattcacat 1
aggtgagaatcttgatgatgctgc 1
aggtgagaatcttgatgatgctg 1
gtgagaatcttgatgatgctgcat 17
tgagaatcttgatgatgctgcat 4
gagaatcttgatgatgctgca 10
gagaatcttgatgatgctgcat 3
agaatcttgatgatgctgcatc 1
agaatcttgatgatgctgc 3
AGAATCTTGATGATGCTGCAT 9265 miRNA
agaatcttgatgatgctgca 66
gaatcttgatgatgctgcat 4
ptc-miR172f
gtcgttgtttgcgggtgctgcatcaccaagattcacatgcaaatgcatggccgatgatatatgttagaaattttttttatataaaaaagatatctttctttctttctgatcatctgccaaagttctttggaagtgAGAATCTTGATGATGCTGCATcggcaataaacgac 9376
((((((..((((.(((((.((((((.((((((((.(((.((((.((.((((.((((((....(..(((((((((((((....)))))))))....))))..)......)))))).))))..))..))))...)))->>>>>>>>->>>>>>->>>>).))))..))))))
gtgagaatcttgatgatgctgcat 17
tgagaatcttgatgatgctgcat 4
gagaatcttgatgatgctgca 10
gagaatcttgatgatgctgcat 3
agaatcttgatgatgctgcatc 1
agaatcttgatgatgctgc 3
AGAATCTTGATGATGCTGCAT 9265 miRNA
agaatcttgatgatgctgca 66
gaatcttgatgatgctgcat 4
cttgatgatgctgcatcggca 1
ttgatgatgctgcatcggcaa 2
ptc-miR390a
ttgtacacacaagtacgggagaatctgtTAAGCTCAGGAGGGATAGCGCcatgagcatgacaaagtctatgtttgagttaatctcaacaaaatcaatccagtcatcagtggcgctatctatcctgagttctatgggttctccttactattctggtgcag 378
((((((.....((((.((((((((((((--<<<<<<<<<-<<<<<<<<<(((..(.(((((........((((.(((.....)))))))...........)))))).)))))))))))).)))))))))..))))))))))))))))......))))))
atctgttaagctcaggaggga 1
taagctcaggagggatagcgcc 72
taagctcaggagggatagcg 1
TAAGCTCAGGAGGGATAGCGC 228 miRNA
taagctcaggagggatagc 1
aagctcaggagggatagcgcca 2
aagctcaggagggatagcgc 3
aagctcaggagggatagcgcc 70
ptc-miR390b
agtatggaagaatctgtTAAGCTCAGGAGGGATAGCGCcctaaggataatcatgggctctttttatgtggtttttgattctcagtggcgctatccatcctgagtttcattgcttcttcttgct 378
((((.(((((((.(.((-<<<<<<<<<<-<<<<<<<<<(((.((((...(((..(((((.......).))))..))))))).)).)))))))))).)))))))))).)).).)))))))))))
aagaatctgttaagctcaggaggg 2
atctgttaagctcaggaggga 1
taagctcaggagggatagcgcc 72
taagctcaggagggatagcg 1
TAAGCTCAGGAGGGATAGCGC 228 miRNA
taagctcaggagggatagc 1
aagctcaggagggatagcgc 3
aagctcaggagggatagcgcc 70
ptc-miR390c
tgatatgtgcataagtatgggaggatctgtTAAGCTCAGGAGGGATAGCGCcatgagctgatgataagttgatgtttgatgggttaatctcaacataatcaatctagtcattagtggcgctatctatcctgagttctataggttctccttgctattccggtacagtttca 378
(((..(((((...((((.((((((((((((--<<<<<<<<<-<<<<<<<<<(....(((((((((.(((((((...((.((((.....)))).))..))))).)).))))))))))))))))))).)))))))))..))))))))))))))))......)))))...)))
atctgttaagctcaggaggga 1
taagctcaggagggatagcgcc 72
taagctcaggagggatagcg 1
TAAGCTCAGGAGGGATAGCGC 228 miRNA
taagctcaggagggatagc 1
aagctcaggagggatagcgcca 2
aagctcaggagggatagcgc 3
aagctcaggagggatagcgcc 70
ptc-miR390d
ttgatatatagaagtatggaagaatctgtTAAGCTCAGGAGGGATAGCGCcctaaggataaccatgggctctttttatttggtttttgactatcagtggcgctatccatcctgagttttactggttcttcttgctacgatcag 378
(((((.....(.((((.(((((((((.((-<<<<<<<<<<-<<<<<<<<<(((...((((..((..((((..........))))..))..)))))).)))))))))).)))))))))).)).))))))))))))).).)))))
aagaatctgttaagctcaggaggg 2
atctgttaagctcaggaggga 1
taagctcaggagggatagcgcc 72
taagctcaggagggatagcg 1
TAAGCTCAGGAGGGATAGCGC 228 miRNA
taagctcaggagggatagc 1
aagctcaggagggatagcgc 3
aagctcaggagggatagcgcc 70
ptc-miR393c
tagtgcagctggagtgtTCCAAAGGGATCGCATTGATCTaatgactctcgatgtctaaatcatattaatgtttagttttttcgttggatcatgcgatcccttaggaattttccagcattcagctcta 40
(((.((.(((((((.((<<<-<<<<<<<<<<<<-<<<<<(((((.....((...(((((.(((....))))))))...)))))))))}}}}}}}}}}}}}}}=}}}}}.))))))).....)).)))
TCCAAAGGGATCGCATTGATCT 31 miRNA
tccaaagggatcgcattgatc 2
caaagggatcgcattgatct 1
atcatgcgatcccttaggaat 6
ptc-miR394a
tcatgtgggttttgcaaagggtttcttacagagttttTTGGCATTCTGTCCACCTCCatctgtagaaactacaagttgttctactttctggaggtgggcatactgccaactgagctctgttggtctctctttgtaaaaccctcgtga 1137
(((((.(((((((((((((((...((.(((((((((.<<<<<<-<-<<<<<<<<<<<(...((((((.(........)))))))....)))}}}}}}}}}=}=}}}}}}==))))))))).))...))))))))))))))).)))))
aagggtttcttacagagtttt 2
agagttttttggcattctgtccacc 5
ttttttggcattctgtccacc 2
ttggcattctgtccacct 1
ttggcattctgtccacctcca 8
TTGGCATTCTGTCCACCTCC 1106 miRNA
ttggcattctgtccacctc 3
tggcattctgtccacctcc 3
ggcattctgtccacctcc 1
actttctggaggtgggcatactg 1
tttctggaggtgggcatactgcca 1
aggtgggcatactgccaact 2
gctctgttggtctctctttgt 1
ctgttggtctctctttgtaaa 1
ptc-miR394b
tcatgtggatttagcaaagggtttcttacagagtttaTTGGCATTCTGTCCACCTCCtatctttagaaattagaatatctctttcatatggaggtgggcatactgccaaccgagctctgttggtctctctttgtaaaaccctcgtga 1130
(((((.((.(((.((((((((...((.(((((((((.<<<<<<-<-<<<<<<<<<<<.......(((.((......)).))).......))))))))))).).))))))..))))))))).))...)))))))).))).)).)))))
aagggtttcttacagagttta 3
agagtttattggcattctgtccacc 6
tttattggcattctgtccacc 2
attggcattctgtccacctcc 2
ttggcattctgtccacct 1
ttggcattctgtccacctcct 1
TTGGCATTCTGTCCACCTCC 1106 miRNA
ttggcattctgtccacctc 3
tggcattctgtccacctcc 3
ggcattctgtccacctcc 1
gctctgttggtctctctttgt 1
ctgttggtctctctttgtaaa 1
ptc-miR395b
tgcaatggtgcatagatcaagtgtcccctagagttcccttgagcacttcactgggacccttcagaccgaaagagtattatctttcccaCTGAAGTGTTTGGGGGAACTCctggtgtcatttgatgttaataattagttaattgca 84
((((((...((..(.((((((((.(.((..(((((((((..(((((((((.(((((........(((....).))........)))))->>>>>>>>>-->>>>>>>>>..)).).)))))))).).........))..))))))
CTGAAGTGTTTGGGGGAACTC 80 miRNA
ctgaagtgtttgggggaa 1
ctgaagtgtttgggggaac 1
tgaagtgtttgggggaactc 2
ptc-miR395c
tagcatagatcaagtgtcccctagagttcctctgagcacttcattgggaatcttcgattaaatgaaagagtattatcattcctaCTGAAGTGTTTGGGGGAACTCctggtgtcatttgatgtta 84
(((((....(((((((.(.((..(((((((((..(((((((((.((((((..((((......)))).((......)).))))))->>>>>>>>>-->>>>>>>>>..)).).))))))))))))
CTGAAGTGTTTGGGGGAACTC 80 miRNA
ctgaagtgtttgggggaa 1
ctgaagtgtttgggggaac 1
tgaagtgtttgggggaactc 2
ptc-miR395d
agcatgccatagatcaagtgtcccctagagttcctctgagcacttcactgggaatttccgatcaaatgaaagagtattatcattcctaCTGAAGTGTTTGGGGGAACTCctggtgtcatttgatgtttacaagct 84
(((.((....(.((((((((.(.((..(((((((((..(((((((((.(((((((......((........))........)))))))->>>>>>>>>-->>>>>>>>>..)).).)))))))).)...)).)))
CTGAAGTGTTTGGGGGAACTC 80 miRNA
ctgaagtgtttgggggaa 1
ctgaagtgtttgggggaac 1
tgaagtgtttgggggaactc 2
ptc-miR395e
gaaacgcaaagaacgttagctgtcccccggagtttccctgaccacttcactggggctataattctactcttcgtgtttaagggtagaggcaacccttcctcaCTGAAGTGTTTGGGGGAACTCtgggtggcatttaacactgtttagctgtc 85
((...(((((.(..(((((.((((.((((((({{{{{{=={={{{{{{{={{{((......((((((((((.......)))))))))).........)))))->>>>>>>->-->>>>>>>>>)))).)))).)))))..).))).))..))
tttccctgaccacttcactgg 1
CTGAAGTGTTTGGGGGAACTC 80 miRNA
ctgaagtgtttgggggaa 1
ctgaagtgtttgggggaac 1
tgaagtgtttgggggaactc 2
ptc-miR395g
atcaagtgtcccctagagttcctctgagcacttcattggggatcttccatcgacctgaaagagtattatcattcctaCTGAAGTGTTTGGGGGAACTCctggtgtcatttgat 84
((((((((.(.((..(((((((((..(((((((((.((((((((((.((......)).)))).........))))))->>>>>>>>>-->>>>>>>>>..)).).))))))))
CTGAAGTGTTTGGGGGAACTC 80 miRNA
ctgaagtgtttgggggaa 1
ctgaagtgtttgggggaac 1
tgaagtgtttgggggaactc 2
ptc-miR395h
atcaagtgtcccctagagttcctctgagcacttcattggggatcttccatcgacctgaaagagtattatcattcctaCTGAAGTGTTTGGGGGAACTCctggtgtcatttgat 84
((((((((.(.((..(((((((((..(((((((((.((((((((((.((......)).)))).........))))))->>>>>>>>>-->>>>>>>>>..)).).))))))))
CTGAAGTGTTTGGGGGAACTC 80 miRNA
ctgaagtgtttgggggaa 1
ctgaagtgtttgggggaac 1
tgaagtgtttgggggaactc 2
ptc-miR395i
ttattttttgttttcgttaattgttgatagcacagatcaagtgtcccctagagttcctctgagcacttcaatggggatcttccatcgacctgaaagagtattatcattcctaCTGAAGTGTTTGGGGGAACTCctggtgtcatttgatgttacaagctcagaaaacacagtaa 84
(((((...(((((((.......(((..(((((....(((((((.(.((..(((((((((..(((((((((.((((((((((.((......)).)))).........))))))->>>>>>>>>-->>>>>>>>>..)).).))))))))))))..)))...))))))).)))))
CTGAAGTGTTTGGGGGAACTC 80 miRNA
ctgaagtgtttgggggaa 1
ctgaagtgtttgggggaac 1
tgaagtgtttgggggaactc 2
ptc-miR396a
tcttggtattcTTCCACAGCTTTCTTGAACTGcacctatttgaatattgttgttgatgttgccgtgcatgtacatatgacattgtatttttgttgcggttcaataaagctgtgggaagatacaaacagga 2178
(((((((((..<<<<<<<<<<<<-<<<<<<<<((...((..((((((...((((((((((((...)))...)))).)))))..))))))..))))}}}}}}}}=}}}}}}}}}}}}..))))...)))))
cttccacagctttcttgaact 1
ttccacagctttcttgaact 31
ttccacagctttcttgaac 388
TTCCACAGCTTTCTTGAACTG 979 miRNA
ttccacagctttcttgaa 68
ttccacagctttcttgaactgcac 1
ttccacagctttcttgaactgca 2
ttccacagctttcttgaactgc 1
tccacagctttcttgaac 1
tccacagctttcttgaactg 3
tccacagctttcttgaactgca 1
ccacagctttcttgaactgca 34
cacagctttcttgaactg 10
gcggttcaataaagctgtgggaag 1
cggttcaataaagctgtgggaaga 2
cggttcaataaagctgtggga 8
ggttcaataaagctgtgggaa 1
ggttcaataaagctgtgggaag 3
gttcaataaagctgtgggaag 454
gttcaataaagctgtgggaa 4
gttcaataaagctgtgggaaga 1
ttcaataaagctgtgggaag 102
ttcaataaagctgtgggaa 1
ttcaataaagctgtgggaagat 1
ttcaataaagctgtgggaaga 51
tcaataaagctgtgggaaga 3
tcaataaagctgtgggaagat 3
tcaataaagctgtgggaagata 2
tcaataaagctgtgggaagataca 2
taaagctgtgggaagatacaaa 9
taaagctgtgggaagatacaaaca 1
aaagctgtgggaagatacaaacag 2
aagctgtgggaagatacaaacagg 3
ctgtgggaagatacaaacagg 1
ctgtgggaagatacaaacag 1
tgtgggaagatacaaacagga 2
ptc-miR396b
ggtgtggttgtacgtgaccctctttgtattcTTCCACAGCTTTCTTGAACTGcacctattagattaatgttgatgttgttgtgcgatatgccatgaccatatgacattgtattcatttttgctgcggttcaataaagctgtgggaagatacaaacaggatcaaagaaagttgctatgtc 2178
((..((((...((.(((.(((.(((((((..<<<<<<<<<<<<-<<<<<<<<((.(.....((.(((((((.((((.((..((.(.....)))..)).)))))))))))...))......).))}}}}}}}}=}}}}}}}}}}}}..))))))).))).)))......)).))))..))
cttccacagctttcttgaact 1
ttccacagctttcttgaact 31
ttccacagctttcttgaac 388
TTCCACAGCTTTCTTGAACTG 979 miRNA
ttccacagctttcttgaa 68
ttccacagctttcttgaactgcac 1
ttccacagctttcttgaactgca 2
ttccacagctttcttgaactgc 1
tccacagctttcttgaac 1
tccacagctttcttgaactg 3
tccacagctttcttgaactgca 1
ccacagctttcttgaactgca 34
cacagctttcttgaactg 10
gcggttcaataaagctgtgggaag 1
cggttcaataaagctgtgggaaga 2
cggttcaataaagctgtggga 8
ggttcaataaagctgtgggaa 1
ggttcaataaagctgtgggaag 3
gttcaataaagctgtgggaag 454
gttcaataaagctgtgggaa 4
gttcaataaagctgtgggaaga 1
ttcaataaagctgtgggaag 102
ttcaataaagctgtgggaa 1
ttcaataaagctgtgggaagat 1
ttcaataaagctgtgggaaga 51
tcaataaagctgtgggaaga 3
tcaataaagctgtgggaagat 3
tcaataaagctgtgggaagata 2
tcaataaagctgtgggaagataca 2
taaagctgtgggaagatacaaa 9
taaagctgtgggaagatacaaaca 1
aaagctgtgggaagatacaaacag 2
aagctgtgggaagatacaaacagg 3
ctgtgggaagatacaaacagg 1
ctgtgggaagatacaaacag 1
tgtgggaagatacaaacagga 2
ptc-miR396f
gcacggcttgtagatatatatgggtctcttggtgatTTTCCACGGCTTTCTTGAACTgtatatattatcaatggctttttacaagactggaagatggtttccatggagaagaattgtcacaaaaacagttcaagaaagccctgaaaaattatttagaggatctagtttatatatgtctatacaatggctggc 386
((.((((((((((((((((((((((((((..(((((<<<-<<-<<<<<<<<<<<<<<((.........((((..((((((.((....((((((....)))))))))))))).))))........)))))))))))))))).)).))))))))..))).))))).....)))))))))))))....)))))))
ttttccacggctttcttgaac 1
TTTCCACGGCTTTCTTGAACT 251 miRNA
tttccacggctttcttgaa 1
tttccacggctttcttgaac 40
ttccacggctttcttgaact 54
ttccacggctttcttgaactg 3
ttccacggctttcttgaac 28
ttccacggctttcttgaa 8
ptc-miR396g
gagaagaaactaaggtcgttgcatgcttTTCCACGGCTTTCTTGAACTTggcactcaagagacatgagagtaaagggctaggctttcttttctattcctttcgttctttgaaattttcctgttcaaagaatccatacatatcagtctctttagtacaaagctcaagaaagccgtgggaaaatatgaaaggattttgtggtgtaatctt 1176
((((....((((.((((.((.((((.((<<<<<<<<<<<<<<<<<-<<<.(.(((.(((((((.(((....(((((..((((........))))..))))).((((((((((.........)))))))))).........)))))))))).))).).}}}=}}}}}}}}}}}}}}}}})).)))).)).))))...))))....))))
ttttccacggctttcttgaac 1
tttccacggctttcttgaact 251
tttccacggctttcttgaa 1
tttccacggctttcttgaactt 59
tttccacggctttcttgaac 40
ttccacggctttcttgaact 54
TTCCACGGCTTTCTTGAACTT 557 miRNA
ttccacggctttcttgaac 28
ttccacggctttcttgaa 8
tccacggctttcttgaactt 1
ccacggctttcttgaacttgg 6
cacggctttcttgaactt 9
acggctttcttgaacttggca 5
cggctttcttgaacttggca 4
cggctttcttgaacttggcac 1
aaagctcaagaaagccgtgggaaa 1
aagctcaagaaagccgtgggaaa 2
aagctcaagaaagccgtg 1
aagctcaagaaagccgtggga 9
gctcaagaaagccgtgggaaa 6
ctcaagaaagccgtgggaaa 57
ctcaagaaagccgtgggaaaa 73
tcaagaaagccgtgggaaaa 1
agaaagccgtgggaaaatatgaaa 1
ptc-miR397a
gtggaggcttcctggattggagaaccaTCATTGAGTGCAGCGTTGATGaaatcctccattttgtgctattaaactgttaccaaccctttatggggcatggcatcatttcaccagcgctgcattcaatcatgtttttctaactcttccgggcatggttttgc 292
(..(((.(..((((((((((((((.((<-<<<<<<<<<<<<<<<<-<<((((...((((...((........)).........(((.....)))..))))....))))))=}}}}}}}}}}}}}}}}=}}}.))))))))....))))))...).)))..)
tcattgagtgcagcgttgat 6
tcattgagtgcagcgttga 6
tcattgagtgcagcgttgatgaa 2
TCATTGAGTGCAGCGTTGATG 272 miRNA
cattgagtgcagcgttgatg 1
attgagtgcagcgttgatg 4
ccagcgctgcattcaatcatg 1
ptc-miR399f
gatggagctaggcaatacatttatcatttatggctaaagaataacagggctttatcctcctttggcaaacagaacatggaaataaatgcctgcatatttctgtttTGCCAAAGGAGAATTGCCCTGccattcgattccacagttacttgaatgtgtctattgctcttc 19
((.((((((((((...(((((((....((.(((.....((((..((((((...((.((((((((((((((((((.((....))..(((....)))..))))).))>>>>>>>>>>>->>->>>>>>..))))....))).)).....))))))))))))..)))))))
TGCCAAAGGAGAATTGCCCTG 19 miRNA
ptc-miR399g
gagtagtgatgaataactgtgcaattctcctttggcagacgtatatggcgttcggacaccaactttggacTGCCAAAGGAGAATTGCCCTGccattcaactacactgcc 20
(.((((((.(((((..(.{={{{{{{{{{{{{{{{{{{=((....(((.((....)).)))....))..)>>>>>>>>>>>>>>>>>->->..)))))....)))))))
gtgcaattctcctttggcaga 1
TGCCAAAGGAGAATTGCCCTG 19 miRNA
ptc-miR403a
ggaagaggcatatttcaggtttgtgcatgaatctaatatagctaaaaaaatcccatcaaacacaaattaaaatactagatagcaatcagcactagtttagtatagtaTTAGATTCACGCACAAACTCGtaatctgtctttttc 178
((((((((((.(((.(..((((((((.((((((((((((.(((((............................(((((...((.....)).))))))))))...)))>>>>>>>>>->>>>>>>>-->.))).))))))))))
tttgtgcatgaatctaatata 3
ttagattcacgcacaaactcgt 5
ttagattcacgcacaaact 1
ttagattcacgcacaaac 17
TTAGATTCACGCACAAACTCG 152 miRNA
ptc-miR403a
ggaagaggcatatttcaggtttgtgcatgaatctaatatagctaaaaaaatcccatcaaacacaaattaaaatactagatagcaatcagcactagtttagtatagtaTTAGATTCACGCACAAACTCGtaatctgtctttttc 178
((((((((((.(((.(..((((((((.((((((((((((.(((((............................(((((...((.....)).))))))))))...)))>>>>>>>>>->>>>>>>>-->.))).))))))))))
tttgtgcatgaatctaatata 3
ttagattcacgcacaaactcgt 5
ttagattcacgcacaaact 1
ttagattcacgcacaaac 17
TTAGATTCACGCACAAACTCG 152 miRNA
ptc-miR403b
agaggactcatatctctagtttgttcgtggatctgacgccatcacaaccgttcatttcacgaccatccaatggcgTTAGATTCACGCACAAACTCGcgatctgtctcctct 170
((((((..((.(((.(.(((((((.(((((((((((((((((......(((.......)))........))))))>>>>>>>>>>>->>>>>>>->.))).))..))))))
ttagattcacgcacaaact 1
ttagattcacgcacaaac 17
TTAGATTCACGCACAAACTCG 152 miRNA
ptc-miR472a
agttaacacatatgggaggaatggagagggagtaggattttcggaaggttatcgggtgggtgagcggggaagataactttggtttttgagatagtacttgttaTTTTCCCTACTCCACCCATCCCataggtttccgatcattcctccctctcctcatcactctgcttctcatggcctgtttatct 672
((..((((..(((((((((...((((((((((..((((..(((((((.((((.(((((((((((..(((((((((((...(((.((......)).))).))))>>>>>>>-->>->>>>>>>>>-)))).)))))))..))))))))))))))...........)))))))))...))))...))
gagggagtaggattttcggaagg 1
agggagtaggattttcggaaggt 1
gagtaggattttcggaaggttat 2
gagtaggattttcggaaggtta 1
agtaggattttcggaaggttatc 2
agtaggattttcggaagg 1
agtaggattttcggaaggttatcg 417
agtaggattttcggaaggttatcggg 1
agtaggattttcggaaggttat 12
agtaggattttcggaaggttatcgg 58
agtaggattttcggaaggtta 12
gtaggattttcggaaggttatcg 3
gtaggattttcggaaggttatcgg 2
gtaggattttcggaaggttatcggg 1
gattttcggaaggttatcgggtgg 1
tatcgggtgggtgagcggggaa 1
cgggtgggtgagcggggaagata 1
ggtgggtgagcggggaagata 3
tgggtgagcggggaagataac 3
ttttccctactccacccatcc 7
TTTTCCCTACTCCACCCATCCC 140 miRNA
tttccctactccacccatccc 2
ptc-miR827
ttgcaaccatgaatatatttgttgatagtcatctagtgaacattgaaagtcataTTAGATGACCATCAACGAAAAcattcatgatattgcaa 126
((((((.(((((((.(.{{{{{{{{{={{{{{{{{{{{.((.......))..))>>>>>>>>>->>>>>>>>>->.)))))))...))))))
tttgttgatagtcatctagtg 1
TTAGATGACCATCAACGAAAA 122 miRNA
ttagatgaccatcaacgaaa 3
ptc-miRX1
tgaaatccaagtggacttcccttacaatctactctttcagtttcacagaagatccagattagattttaaggcaaacaaattgaTAGAGCAGATTGTAAGGGAAGcccacatggatttca 43460
(((((((((.((((.(({{{{{{{{{{{{{={{{{={{(((((..(..((((((.......))))))..)......)))))))->>>>->>>>>>>>>>>>>>>.)))).)))))))))
atccaagtggacttcccttacaat 3
tccaagtggacttcccttacaatc 2
tccaagtggacttcccttaca 2
caagtggacttcccttacaat 13
aagtggacttcccttacaatct 20
aagtggacttcccttacaa 8
aagtggacttcccttacaatctac 23
aagtggacttcccttacaatc 100
aagtggacttcccttacaat 4
agtggacttcccttacaat 1
agtggacttcccttacaatc 14
agtggacttcccttacaa 1
agtggacttcccttacaatct 143
agtggacttcccttacaatctac 1
tggacttcccttacaatctac 3
tcccttacaatctactctttc 3
ttacaatctactctttcagtt 1
tacaatctactctttcagttt 1
ttgatagagcagattgtaagg 7
tgatagagcagattgtaagggaag 86
tgatagagcagattgtaagggaa 2
tgatagagcagattgtaaggg 53
gatagagcagattgtaaggga 2
atagagcagattgtaagggaag 7
atagagcagattgtaagggaa 18
tagagcagattgtaagggaagccc 3
TAGAGCAGATTGTAAGGGAAG 41612 miRNA
tagagcagattgtaagggaa 64
tagagcagattgtaagggaagc 3
tagagcagattgtaagggaagcc 1
tagagcagattgtaaggga 12
tagagcagattgtaaggg 4
agagcagattgtaagggaag 15
agagcagattgtaagggaagccca 9
gagcagattgtaagggaag 5
gagcagattgtaagggaagcc 1
agcagattgtaagggaag 1
agcagattgtaagggaagccc 2
gcagattgtaagggaagccca 167
cagattgtaagggaagccca 35
agattgtaagggaagccca 1
agattgtaagggaagcccaca 1
agattgtaagggaagcccacatgg 1
attgtaagggaagcccacatg 2
ttgtaagggaagcccacatg 110
ttgtaagggaagcccacat 72
ttgtaagggaagcccaca 7
ttgtaagggaagcccacatgg 810
ttgtaagggaagcccacatgga 3
tgtaagggaagcccacatgg 1
ptc-miRX105
gggagatgctgtgTGACCTTGTGGAGCCGGCGTTgatggagatcggtctgtccgttgacccggagggaagtggggggtcggttgagagagacccggctgtgggttactgctgctgctgcc 17
((.((..((.(((<<<<<<---<-<<<<<<-<<<......(((((..((.((((((..((....))..))))))))..)))))......))))))))).)))))))).)).))..)).))
tgctgtgtgaccttgtggagccgg 1
tgtgtgaccttgtggagccgg 1
gtgtgaccttgtggagccggcgtt 3
gtgtgaccttgtggagccggc 1
tgtgaccttgtggagccggcg 3
tgaccttgtggagccggcgt 1
TGACCTTGTGGAGCCGGCGTT 6 miRNA
cttgtggagccggcgttgatgg 1
ptc-miRX111
tgcagagtagaagtcgagctcaagcacaaattcgatcttgcttaacaaggtaccggcaaagtcagaTCGAATTTGGGCTTGAGATTGtcttcttcgttgca 1070
(((((...(((((={{{={{{{{{{={{{{{{{{((((.((((.....(....)....)))).)))>>>>>>>>>->>>>>>>->>>.)))))...)))))
tcgagctcaagcacaaattcg 1
agctcaagcacaaattcgatc 17
agctcaagcacaaattcga 1
tcgaatttgggcttgagat 3
tcgaatttgggcttgagattgt 31
TCGAATTTGGGCTTGAGATTG 966 miRNA
tcgaatttgggcttgagatt 35
tcgaatttgggcttgaga 1
gaatttgggcttgagattg 4
gaatttgggcttgagatt 1
gaatttgggcttgagattgt 1
tttgggcttgagattgtcttc 9
ptc-miRX112
gatatctcattcatatatcatttattccagcattcttgattgaatgccacatatcattcattcctgctttttatatgaaaagtcggaatgaaTGATATGTGGCATTCAATCGAgaatgctggaataaatgatatctgaacaattgatc 114
(((......((((.((((((((((((((((((((((((((((((((((((((((((((((((((.(((((((....))))))).))))))))>>>>>>>>>>>>>>>>>>>>>))))))))))))))))))))).))))......)))
ttattccagcattcttgattg 1
tcggaatgaatgatatgtggcatt 3
cggaatgaatgatatgtggca 2
atgatatgtggcattcaatcg 8
atgatatgtggcattcaatcgaga 3
tgatatgtggcattcaatcgagaa 2
TGATATGTGGCATTCAATCGA 95 miRNA
ptc-miRX119
cattgtaggacattcgtcggcaaccatttagtcatgtttgctaacatgaccgtccaagttatcaattatgtcaggttacattaaggaagctggcatgagcatgccatcaaagttgttgacatgtttgtcatctTGGATGATCATGTTGGCAACCatgttgatgtggtagatcatgtgctgcgtatg 39
((((((((.((((..(((....(((((((((.((((.{{{{{{{{{{{{={{{{{{{{....(((.(((((((....(((.....((...((((((....)))))))).....)))))))))).)))....))>>>>>>->>>>>>>>>>>>->))))))).))))).))).)))).))))).)))
ttgctaacatgaccgtccaag 8
tcttggatgatcatgttggca 3
cttggatgatcatgttggcaa 4
TGGATGATCATGTTGGCAACC 22 miRNA
tggatgatcatgttggcaacca 2
ptc-miRX12
ggacccatgcatggcgaacaagttgagctgtagggttatgatgaacatgctaattacaagctattgtcttccatggaataggcagtgatggcatttgttttattttcctgaggtggagaaaaacaaatagaccataacactgttatTCCATGGAAGATAATGACTCGtggttgacacttgatctctccagtccagttcagattcaagctagctgctgtct 57
((((....((.((((.......((((((((...((....(((.((..((.(((((((.((.((((((((((((((((((((.(((((((((((((((((((..(((((......)))))))))))))).).))))..)))))))))>>>>>>>>>>>>>>>>->>->)))))).)).)).)))...))....))))))))......))))))....))))
ttgtcttccatggaataggcag 19
ttgtcttccatggaataggc 2
ttgtcttccatggaataggca 9
ttccatggaataggcagtgatg 1
TCCATGGAAGATAATGACTCG 24 miRNA
tccatggaagataatgac 2
ptc-miRX120
agatgatatttttttattttgaaaattaTGATTGCTTGTTGGATATTATacatattatataatatgtataatatccaacaagcaatcataatttcttgcaaagcgatgagaattcact 12
((.(((.(((((((..(((((.((((((<<<<<<<<<<<<<<<<<<<<<(((((((....))))))))))))))))))))))))))))))))))....)))))..).)))))))))))
attatgattgcttgttggata 3
tatgattgcttgttggatatt 1
tgattgcttgttggatattata 1
TGATTGCTTGTTGGATATTAT 7 miRNA
ptc-miRX121
aaggctctttaactttaTTAAAGCAGGGGGTCTAGTAGTttaactatttagaagatagattttaaataaggctctttaacttatgatatatttaaaagctatcttctaactagttaaactaccagacccctgctttaatataaagtaataatcaccctt 19
((((....(((((((((<<<<<<<<<<<<-<<<-<<<<<(((((((.(((((((((((.(((((((((...(............)...))))))))).))))))))))).)))))))))))).))))))))))))))..)))))))..)))....))))
ttattaaagcagggggtctagt 1
attaaagcagggggtctagtag 1
TTAAAGCAGGGGGTCTAGTAGT 8 miRNA
ttaaagcagggggtctagtag 2
ttaaagcagggggtctagtagttt 1
aaagcagggggtctagtagtttaac 1
aagcagggggtctagtagttta 1
aagcagggggtctagtagtttaa 1
agcagggggtctagtagtttaa 1
tatcttctaactagttaaact 1
tcttctaactagttaaactac 1
ptc-miRX123
ggtgcatatatatacatgaatgtgcctcatgTCTGGTATGAGCATTTGATGAttgataatttcaatttgtttacatcttttttctgcaatcctaataccgcgtactttcaaatgtaaagaaattgaaattatcaatcatcaaatgttcgtaccatacgtaaggcacactcgtatgtataattgtatt 143
((((((..((((((.((((.(((((((.(((<-<<<<<<<<<<<<<<<<<<<((((((((((((((((.(((((((........(((............))).........))))))).))))))))))))))))))))))))))))))))))).)))).))))))).)))).))))))..))))))
tgtctggtatgagcatttgatgat 1
gtctggtatgagcatttgatg 1
tctggtatgagcatttgatgat 1
TCTGGTATGAGCATTTGATGA 134 miRNA
tggtatgagcatttgatga 4
gcatttgatgattgataattt 2
ptc-miRX126
tcttcagatgattctcaatgATAAGCTGTCGAGCGTTTTGTctcaagctgcaaatgacaaaacgctcgacagcttatcattgagaaccatgctgtacgga 21
(((.((((((.(((((((((<<<<<<<<<<<<<<<<<<<<<(.............))))))))))))))))))))))))))))))).))).)))...)))
tctcaatgataagctgtcgag 1
tcaatgataagctgtcgagcg 2
aatgataagctgtcgagcgttttg 1
ATAAGCTGTCGAGCGTTTTGT 14 miRNA
aagctgtcgagcgttttgtctcaag 1
aagctgtcgagcgttttgtct 1
aagctgtcgagcgttttgtctca 1
ptc-miRX128
cttggttactgatattattttgaaccgtcatgtcaattattggttatatatcgactgaaaatgaaagctatttcactattctgtgcacacaatgcttgaaacattaatcatggtttttgaaagtattggagcaTTGTACACAGAATAGGTGAAATaactttcattttcattcgatacgcaactaaaattgtaaatatagttcagtctcatcttggaagccaag 300
(((((((.(..(.......((((((..(.....(((((.((((((.(.((((((.((((((((((((.(((((((((((((((((...(((((((((.((((.....(((.......)))..)).)).)))))>>>>->>>>>>>>>->>>>>>>).)))))))))))).)))))).).))))))))))).....)..)))))).......)..).)))))))
tcgactgaaaatgaaagcta 1
tcgactgaaaatgaaagctat 11
aaagctatttcactattctgt 1
ttgtacacagaataggtgaaata 1
ttgtacacagaataggtgaaa 1
TTGTACACAGAATAGGTGAAAT 278 miRNA
tgtacacagaataggtgaaat 1
cagaataggtgaaataactttc 6
ptc-miRX13
ggactcatgcatggcgaacaagttgagctgtagggttatgatgaacatgctaattacaagctattgtcttccatggaataggcagtgatggcatttgttttattttcctgaggtggagaaaaacaaggagaccataacactgttatTCCATGGAAGATAATGACTCGtggttgacacttgatctctccagtccagttcagattcaagctagctgctgtct 57
((((....((.((((.......((((((((...((....(((.((..((.(((((((.((.((((((((((((((((((((.((((((((((.((((((((..(((((......)))))))))))))..).))))..)))))))))>>>>>>>>>>>>>>>>->>->)))))).)).)).)))...))....))))))))......))))))....))))
ttgtcttccatggaataggcag 19
ttgtcttccatggaataggc 2
ttgtcttccatggaataggca 9
ttccatggaataggcagtgatg 1
TCCATGGAAGATAATGACTCG 24 miRNA
tccatggaagataatgac 2
ptc-miRX134
ggtataggccgagtagtattccaaagaagcttcagataatagcacgttgcatactgagcatcagaagcaatttactcttgatcccagttcacgaatcctcttttgccagattcacgccactaaagattcattgggacatgaatgTGGCAGAAAAGGATTCGTTTAttgagataagcttagagtaattttctatggcactggcgcgacgcactcttaagcaagccactttcagcatactactcttccaatgcc 41
(((((.((..(((((((((.(.((((..((((....(((.((..((((((.((.((..(((.(((((....(((((((..(((.((((..(((((((((.((((((((.(((((.(((.(............))).).))))).>>>>>>>>->>>>>>>>>-->))).)))......))))))).)))))))).)).))..))))))..)).)))...))))..))))..).)))))))))..)).)))))
gggacatgaatgtggcagaaaagg 1
atgtggcagaaaaggattcgttta 1
tggcagaaaaggattcgtt 1
tggcagaaaaggattcgttt 9
TGGCAGAAAAGGATTCGTTTA 28 miRNA
tggcagaaaaggattcgtttat 1
ptc-miRX136
aatgagagaagagtcgagcaaaactaaaagaggaaactaatctatctccctgcaaaatgctgccaagcaacatcgtctagatcttaaatataagatcaagccgaagttggtttgctgcactttgctgggagattagattagtttcctcttTTAGTTTGGCAGCCTCTTCTCttatt 66
(((((((((((((.(..((.((((((((((((((((((((((((((((((.(((((.(((.((.((.((((.(((.((.(((((((....))))))).)).))).)))).)).)).))).))))).)))))).)))))))))))))))))>>>>>>>->>->->>>>>>>>)))))
aagccgaagttggtttgctgcact 2
cctcttttagtttggcagcc 1
TTAGTTTGGCAGCCTCTTCTC 60 miRNA
tagtttggcagcctcttctct 3
ptc-miRX138
atggatgcgaccggcAAGGGACAAAAATGGCATAAGAgagatgtacaggggtagggaaggggaagagaaagatcgatatctacgccccttctttttctcttatgcatttttgtccctcgccagtctcgcccat 15
((((.((.(((.(((-<<<<<<<<<<<<<-<<<<<<<((((..(((....))).((((((((...(((.(......).)))...)))))))).)))))))))))))))))))))))).))).))).)).))))
caagggacaaaaatggcataag 4
AAGGGACAAAAATGGCATAAGA 9 miRNA
ttatgcatttttgtccctcgc 2
ptc-miRX14
ggactcatgcatggcgaacaagttgagctgtagggttatgatgaacatgctaattacaagctattgtcttccatggaataggcagtgatggcatttgttttattttcctgaggtggagaaaaacaaggagaccataacactgttatTCCATGGAAGATAATGACTCGtggttgacacttgatctctccagtccagttcagattcaagctagctgctgtct 57
((((....((.((((.......((((((((...((....(((.((..((.(((((((.((.((((((((((((((((((((.((((((((((.((((((((..(((((......)))))))))))))..).))))..)))))))))>>>>>>>>>>>>>>>>->>->)))))).)).)).)))...))....))))))))......))))))....))))
ttgtcttccatggaataggcag 19
ttgtcttccatggaataggc 2
ttgtcttccatggaataggca 9
ttccatggaataggcagtgatg 1
TCCATGGAAGATAATGACTCG 24 miRNA
tccatggaagataatgac 2
ptc-miRX142
ttcatgattgtttggttattgaagCTCTGATATCATATTAAAAAAttatcttgatctaaaatcaattaagcttttaagtttttaagttgagatggttttttgacatgatatcagagtttgttgaccaagtaattagaa 14
(((.((((((((((((((...(((<<<<<<<<<<<<-<<<<<<<<((((((..(..(((((....((((....))))..)))))..)..)))))))))))))).)))))))))))))))..)))))))))))))))))
CTCTGATATCATATTAAAAAA 6 miRNA
ctctgatatcatattaaaaaat 1
taagtttttaagttgagatgg 1
taagtttttaagttgagatggt 3
taagtttttaagttgagatggtt 1
gttgagatggttttttgacatgat 1
tatcagagtttgttgaccaag 1
ptc-miRX143
atcttttagcattttccaagcaaattgaatttgtatcTTTGGGATCATCAGGACAGCCcctgcatcgagaattatgcagaactctactgaaatgaaacggggaaaaaaaaattatttcaacctttgccacaactgacgcaggggctgccccgataattccaaagatccagtgcaatctgcttgttaaattgctactggat 53
((((..((((((((..((((((.((((...(((.(((<<<<<<<<-<<<-<<-<<<<<(((((.((.((......(((((.......((((((((................))))))))...))))).....)))).)))))))))).)).))).))))))))))).)))..)))).))))))..))).)))))..))))
tatctttgggatcatcaggacagc 13
tatctttgggatcatcaggaca 1
atctttgggatcatcaggaca 1
atctttgggatcatcaggacagc 1
atctttgggatcatcaggacagcc 2
tctttgggatcatcaggacag 1
tctttgggatcatcaggacagccc 1
ctttgggatcatcaggacagc 1
TTTGGGATCATCAGGACAGCC 30 miRNA
ttgggatcatcaggacagccc 2
ptc-miRX144
gccttgggggcttacaTGAAGAGGTAGAGAGTGTAATTcagccaaggatgacttgccggcagcacgggatctcagagcttaataactagaagatcaaggctgtcattacttttccggccggcaagttgcccttggctacattgtactctcttcttctcatgtaaggcctacttggc 27
(((...(((.((((((<<<-<<<<-<<<<<<<<<<<<-.((((((((..((((((((((((((.(..(((((...((........))...)))))..))))...............)))))))))))..))))))))..)}}}}}}}}}}}=}}}}}}}}})))).)))....)))
TGAAGAGGTAGAGAGTGTAATT 10 miRNA
cagccaaggatgacttgccg 5
cagccaaggatgacttgccgg 8
agccaaggatgacttgcc 1
tggctacattgtactctcttc 2
ttgtactctcttcttctcatg 1
ptc-miRX145
agccTAGTGAATTCTAGGTCTCAATCcttttcattcaatccttttaatctattctacatcaattgatattggtccaacatctgttggtatcacagtttgacttgatttaaatcctaaacaaccataaaaagaagaagcctgttctaagtttatgggtcaaggtttaagatgttgtttagtgtttgaattgaggttaagctatgatattaattgatgcagcaccaatatcaattgatgtaaaaccggcaaaaggagttaagagaaaggatagagaacctagaatctactaggct 12
((((<<<<<-<<<<<<<<<<<<-<<<(((((..((...(((((((..((..((.(((((((((((((((((((.(..((((.((((((((((.((((((((((((((((((..(((((((((.((.........((((((..((((......))))...))))))...)))))))))))..)))))))).)))))))))).)))))))))).))))..).))))))))))))))))))).))..)).)))))))...))..)))))))).))).))))))))).)))))))))
TAGTGAATTCTAGGTCTCAATC 11 miRNA
tagtgaattctaggtctcaatcct 1
ptc-miRX146
gaaacaacaacgaGTTGAGATGGCCGAGTTGGTctaaggcgccagattaaggttctggtccgaaagggcgtgggttcaaatcccactctcaacaaatccaatttttttaatattatacttgcaagtcttagcccttatgttcagtttc 149
(((((((((..(.<<<<<<<<---<<<<<<<<<....((.((((((.......))))))))....(((.(((((.......))))).))).....................)))).)))))...)))))))).)...))))..)))))
GTTGAGATGGCCGAGTTGGT 53 miRNA
gttgagatggccgagttgg 15
gttgagatggccgagttggtc 9
gttgagatggccgagttggtct 3
gttgagatggccgagttg 64
gttgagatggccgagttggtcta 5
ptc-miRX15
ggactcatgcatggcgaacaagttgagctgtagggttatgatgaacatgctaattacaagctattgtcttccatggaataggcagtgatggcatttgttttattttcctgaggtggagaaaaacaaggagaccataacactgttatTCCATGGAAGATAATGACTCGtggttgacacttgatctctccagtccagttcagattcaagctagctgctgtct 57
((((....((.((((.......((((((((...((....(((.((..((.(((((((.((.((((((((((((((((((((.((((((((((.((((((((..(((((......)))))))))))))..).))))..)))))))))>>>>>>>>>>>>>>>>->>->)))))).)).)).)))...))....))))))))......))))))....))))
ttgtcttccatggaataggcag 19
ttgtcttccatggaataggc 2
ttgtcttccatggaataggca 9
ttccatggaataggcagtgatg 1
TCCATGGAAGATAATGACTCG 24 miRNA
tccatggaagataatgac 2
ptc-miRX150
cttgtaaatgctcttatctattcggtggTCTTGAGAAGTAAAGAACGACgatagagaaatgttgttttgcaagtaattaaatagagaagccgcatgttaattttaaaatgaaaatgaatggcttttagtgtgataatatggatgcctatctaaatcctcatacttgaaacaagagggcttgcatgaaattaacctcgtcgttctttacttctcaagaccaccgcatagataagagcattatttccatactaccttcttaaatttccatacaag 23
(((((((((((((((((((((.((((((<<<<<<<<<<<<<<<<<<<<<((.........(((....(((((((..((......(((((((.(((....(((....)))....)))...))))))).((((((..((.(((((....))))).))..)))))).........))..)))))))...))).....))))))))))))))))))))))))))))).)))))))))))))))............................))))))
tggtcttgagaagtaaagaa 1
TCTTGAGAAGTAAAGAACGAC 13 miRNA
ttgagaagtaaagaacgacga 5
tgagaagtaaagaacgacgat 4
ptc-miRX154
ccctttcttcttcttcgttgtctactgagTGAACAGTAGACGTGAATTATagttaacgtcctactattcacacatgggcgtgaattataattcacgttcactgttcatgcagtgaatattggg 57
(((...............(((.(((((.(<<<<<<<<--<<<<<<<<<<<((((.((((((..............)))))).)))))))))))))))..))))))))).))))).)))..)))
tgagtgaacagtagacgtgaa 7
tgagtgaacagtagacgtgaat 1
tgaacagtagacgtgaatta 2
tgaacagtagacgtgaattatagt 1
TGAACAGTAGACGTGAATTAT 46 miRNA
ptc-miRX156
ctgagaattggactcatgcatggcgaacaagttgagctgtagggttatgatgaacatgctaattacaagccaTTGTCTTCCATGGAATAGGCAGtgatggcatttgttttattttcctgagttggagaaaaacaaatagaccataacactgttattccttggaagataatgactcgtggttgacacttgatctctccagtccagttcagattcaagctagctgctgtctgtaaattctttg 32
(.(((((((((((....((.((((.......((((((((...((....(((.((..((.(((((((.((.((<<<<<<<<<<-<<<<<<<-<<<((((((((((((((((..(((((......)))))))))))))).).))))..)))))))))))).)))))))))))).)).))))))).)).)).)))...))....))))))))......))))))....))))...))))))).)
TTGTCTTCCATGGAATAGGCAG 19 miRNA
ttgtcttccatggaataggc 2
ttgtcttccatggaataggca 9
ttccatggaataggcagtgatg 1
tccttggaagataatgactcg 1
ptc-miRX16
ttttttcttcttcttctgcacttccatgtctccactgttcacgtgaacaGTGGAGACATGGAAGTGAAGAagaaggagaatgag 24
(((.(((((((((((((.((((((((((((((((((((((....)))))>>>>>>>>>>>>>>>>>->>>)))))))))).)))
gttcacgtgaacagtggagacatg 1
tcacgtgaacagtggagacatgga 1
acgtgaacagtggagacatggaag 1
aacagtggagacatggaagtgaag 1
acagtggagacatggaagtgaaga 11
cagtggagacatggaagtgaa 1
GTGGAGACATGGAAGTGAAGA 8 miRNA
ptc-miRX161
ctcgcaacctctgtctcggaacaatagttcaatcttttcagcaaccttaaatagtgggctatttaaggTTGCTGAAACGATTGAACTATtgtgacttgtgag 252
(((((((.....(((.....((((((((((((((.(((((((((((((((((((....))))))))))>>>>>>>>>->>>>>>>>>>>)))))))))))))
taaggttgctgaaacgattga 1
ttgctgaaacgattgaac 3
TTGCTGAAACGATTGAACTAT 238 miRNA
ttgctgaaacgattgaacta 5
ttgctgaaacgattgaact 1
ttgctgaaacgattgaactatt 3
tgctgaaacgattgaactatt 1
ptc-miRX163
gtggaggtgctggtgctgctggaggctgctggcggtgtcttggcTCACGGACGGCGGCTCCAAGCAgcggcggcggtgctac 38
((((.(.(((((.(((((((((((.((((((.(.(((.......->>>->->>>>>>>>>>->>>>))).))))).).))))
gtcttggctcacggacggcggctc 1
tcttggctcacggacggcg 1
tcttggctcacggacggcggctcc 1
tcttggctcacggacggcggct 1
cttggctcacggacggcggct 1
ttggctcacggacggcggctc 1
ttggctcacggacggcggctcc 2
tggctcacggacggcggctccaag 2
tggctcacggacggcggctcc 2
gctcacggacggcggctccaagca 1
ctcacggacggcggctccaagcag 2
tcacggacggcggctccaagc 6
TCACGGACGGCGGCTCCAAGCA 8 miRNA
tcacggacggcggctccaagcagc 6
acggacggcggctccaagcagc 2
cggacggcggctccaagcagc 1
ptc-miRX20
ataacttcattatagatagttaactcatcaccagtcaatgcatcactgctagcacatgcaagctttcagttgacatttcctgttatataaagaattcctcagaagaaaagcTAGTAGAAATGCATTGACTAGtgatgagttaatttcagttgatttgctgttat 6
[truncated: 671 more rows]
