# Supplementary material for: Deep Annotation of Populus trichocarpa microRNAs from Diverse Tissue Sets
Source: PLoS One. 2012 Mar 19;7(3):e33034. doi: 10.1371/journal.pone.0033034 (PMC3307732; doi:10.1371/journal.pone.0033034)
Supplement: Table S4 — miRNAs annotated from MTX sRNA library. (XLSX) [file pone.0033034.s004.xlsx]

## Sheet: Sheet1
Supplemental Table S4
Mechanically Treated Xylem miRNAs
Alignments of all smallRNA reads and precursor are shown below annotation
miRNA	Sequence	Abundance	Precision	Chromosome	Start	End	Precursor	miRNA*	Orientation	sRNA length	Hairpin Length	Minimum Free Energy	Adjusted MFE
ptc-miR1444a	TCCACATTCGGTCAATGTTCC	152	88.37	scaffold_8	9316683	9316703	TTCGAGTTTATCACTTGAATGTTGACCGAATATGGATGAAAAGTTGTTTTCTGTTTCCTTTCCTCCACATTCGGTCAATGTTCCAGTGATGAGCATGAA((((.((((((((((={{{{{{{{{{{{{{{={{{{.((((.(..(........)..))))).>>>>->>>>>>>>>>>>>>>-)))))))))).))))	TGAATGTTGACCGAATATGGA(11) GAATGTTGACCGAATATGGAT(2) AATGTTGACCGAATATGGATG(2) TGTTGACCGAATATGGATGAA(1)	-	21	99	-43.9	-44.3434
ptc-miR1444b	CACATTCGGTCAACGTTCGAG	109	85.16	scaffold_1646	4001	4021	TCGAATATTTCCTTGTTTATCCCTCGAATATTGATCGAATATGTATGAAATATGATGGTTATATGTTTCATTCACATTCGGTCAACGTTCGAGTGATAAACAGAAATAATTGG((((.((((((..(((((({{={{{{{{=={{{{{{{{{{.((.((((((((((.......)))))))))).>>->>>>>>>>>>-->>>>>>.)))))))))))))).))))	TCCCTCGAATATTGATCGAAT(1) CGAATATTGATCGAATATGTA(14)	-	21	113	-46.4	-41.0619
ptc-miR1446a	TTCTGAACTCTCTCCCTCAAC	719	87.58	scaffold_12	11674484	11674504	GGATGTTGAAGATCCAACTTCTTCTGAACTCTCTCCCTCAACCGCTACTCTAGAGCTTGGCAATCCTTGTCGATTGTTTCTGTGTAGCGGTTGAGGTGAGGGGTTCAGAACATGTTGGCTTCGATGATTC(((((((((((..(((((...<<<<<<<<<<-<<<<<<<<<<((((((.(..((((((((((.....))))))..))))..).)))))}}}}}}}}=}}}}}}}}}}}})...)))))))))))).))))	GGTTGAGGTGAGGGGTTCAGA(1) TGAGGTGAGGGGTTCAGAAC(2)	-	21	130	-66.3	-51
ptc-miR1446b	TTCTGAACTCTCTCCCTCAAC	719	91.71	scaffold_12	11669855	11669875	TTGAAGATCCAATTTCTTCTGAACTCTCTCCCTCAACCGCCACTCTAGAGGTTGGCACCTTGTCAATTGTTTCTGTGTAGCGGTCGAGGTGAGGGGTTCAGAACATGTTGGCTTTGA(..(((..(((((...<<<<<<<<<<-<<<<<<<-<<(((.((.(.((((((((((.....))))))...))))).)).))))).)))).)))))))))))))...))))))))..)	NO	-	21	117	-50.9	-43.5043
ptc-miR1446c	TTCTGAACTCTCTCCCTCAAC	719	95.87	scaffold_12	11790908	11790928	GAATGTTGGAAATCCAACTTTTTCTGAACTCTCTCCCTCAACTGCTATTCTAGAGCTTCCTGAGCTAACCCTTGTGTTTCTGTGTAGCAGTCAAGGTGGGAGGCTCAGAAAATGTTGGTTTCTTAGCTTTTC(((.((((((((.(((((.((<<<<<<-<-<<<<<<<<--<<((((((.(..((((....((((......)))).))))..).))))))))..))).)))))).)))))))).))))))))).))))..)))	NO	+	21	132	-47.2	-35.7576
ptc-miR1446e	TTCTGAACTCTCTCCCTCAAC	719	95.87	scaffold_15	12482374	12482394	GTATCAGAATGTTGGTGATCCAACTTTTTCTGAACTCTCTCCCTCAACTGCTATTCTAGAGCTTGTTAATCCTTGTCAAGTGTTTCCCTGTAGCAGTCGAGGCGAGGGGGTTTCGGAAAATGTTGGCTCCTCAGCTCTTAATTAC(((.......(((((.((.(((((.((<<<<<<<<<<<<<<<<<<-<<((((((......(((((...........)))))........)))))))).)))).))))))).))))))))).))))).)).))))).......)))	NO	+	21	145	-57.48	-39.6414
ptc-miR1447	CAGAATTGCAGTGCCTTGATT	556	95.53	scaffold_13	14548657	14548677	GTGAACGAAGGAGGCCCTAATCAGGGCACTGCAATTCTAAATGTCTGTTGGCAAGTGGCGATGCCAGACGTTTGAAATTTACTTATCATTTATTAGTCAGAATTGCAGTGCCTTGATTTGGGCTTTGTCTGTTCC(.(((((.(.(((((((.(({{{{{{{{{{{{{{{{{{{{{(((((...((((........)))))))))))).......(((...........)))->>>>>>>>>>>>>>>>>>>>.))))))).).))))))	TCAGGGCACTGCAATTCTAAA(136)	+	21	135	-61.3	-45.4074
ptc-miR156a	TGACAGAAGAGAGTGAGCAC	5053	83.84	scaffold_6	19089485	19089504	GAGGGACACAAAAGAAAGACTGACAGAAGAGAGTGAGCACACACGAAAGTATATGGTATGAAGGCATTCCATTGCAGGGTGTGTGCTCACATCTCTTCTGTCAGCTTCCACTTCCAAGTGTTTCCTC(((((((((..(((.(((.(<<<<<<<<<<<<<<<<<<<<((((....(((.((((.(((....))).)))))))...)))))))))))).))))))))))))))))...)))....))).))))))	NO	-	20	127	-62.7	-49.3701
ptc-miR156b	TGACAGAAGAGAGTGAGCAC	5053	85.76	scaffold_6	22869970	22869989	AGAATCGAGGGTTTTAAGGGTAAGGGAGGTGACAGAAGAGAGTGAGCACACAGGGTACTTTCTTGCATGACATCCATGCTTGAAACTTTGCGTGCTCACTCTCTATCTGTCACCCCACCACCATCTCTCTCTCTTTCTCTTCCCCTTTCCCTGTCT(((....((((....(((((.((((((((<<<<<<<<<<<<<<<<<<<<.((((((...(((..(((((.....)))))..))))))))).))))))))))))).))))))))).....................)))))).))))).)))).)))	NO	-	20	156	-73.49	-47.109
ptc-miR156c	TGACAGAAGAGAGTGAGCAC	5053	83.84	scaffold_6	25766678	25766697	TTCTGGACATTAGAAACTGACAGAAGAGAGTGAGCACACAGAGGCATATTTGTATAAATCTATACCATTGCTTTTGCGTGCTCACTTCTCATTCTGTCAGCTTCCAGAG(((((((....((...(<<<<<<<<<<<<<<<<<<<<.((((((((.....(((((....)))))...)))))))).)))))))).)))).))))))))))))))))))	NO	+	20	109	-53.5	-49.0826
ptc-miR156d	TGACAGAAGAGAGTGAGCAC	5053	81.26	scaffold_18	8350113	8350132	GATTCGAGGGTTTTAAGGGTAAGTGAGTTGACAGAAGAGAGTGAGCACACAGGGTACTTTCTTGCATGACGTTCATGCTTGAAGCTTTGCGTGCCCACCCTCTATCTGTCACCCCATCACCATCTCTCCTTCTCTTCCCCTTTCCTTGCCTGTC(((.((((((....(((((.(((.(((.<<<<<<<<<<<-<<<-<<<<.((((((...(((..(((((.....)))))..))))))))).)))).))).)))).)))))))..................))).))).)))))))))))...)))	NO	+	20	154	-54.61	-35.461
ptc-miR156e	TGACAGAAGAGAGTGAGCAC	5053	81.25	scaffold_18	2189701	2189720	TTCCAGCTTCTGGGACATTAGAAATTGACAGAAGAGAGTGAGCACACAGAGGCATATTTGTATAAAATTATACCATTGCTTTTGCGTGCTCATTTCTCTTTCTGTCACTTCCAGAGCCGGAA((((.(((.((((((..........<<<<<<<<<<<<<<<<<<<<.((((((((.....(((((....)))))...)))))))).))))))).))))).)))))))).))))))))).))))	NO	+	20	122	-55	-45.082
ptc-miR156f	TGACAGAAGAGAGTGAGCAC	5053	83.84	scaffold_18	12448555	12448574	GAGGGTCACAAGAGAAAGACTGACAGAAGAGAGTGAGCACACACGAAAGCTAATTGTATGAAAGCATACCATTGCAGGGTGTGTGCTCACTTCTCTTCTGTCAGCTTACATTTGCCAGTGTTTCCTC(((((.(((.(((..(((.(<<<<<<<<<<<<<<<<<<<<((((....((.(((.(((((....))))).)))))...)))))))))))).))))))))))))))))...)))....)))..)))))	NO	-	20	127	-61.6	-48.5039
ptc-miR156g	TTGACAGAAGATAGAGAGCAC	83296	98.57	scaffold_5	11875605	11875625	TTGAATTATGTGAGGAGGCACTGGTGATGTTGTTGACAGAAGATAGAGAGCACAGATGATGAAATGCATGGAGCTTAATTGCATCTCACTCCTTTGTGCTCTCTAGTCTTCTGTCATCACCTTCAGCCCCTCACTCCGTTTAA((((((...((((((.(((...(((((.....-<<<<<<<<<<<<<<<<<<<<(((.(((((.(((((...........))))).))).)).)))))}}}}}}}=}}}}}}}}}}}}})))....)))))))))...))))))	GCTCTCTAGTCTTCTGTCATC(22)	-	21	143	-68.7	-48.042
ptc-miR156h	TTGACAGAAGATAGAGAGCAC	83296	98.34	scaffold_4	7938904	7938924	GTGAAGGAGGCACTGGTGATGCTGTTGACAGAAGATAGAGAGCACTGACGATGAAATGCATGGAGCTTAATTGCATCTCACTCCTTTGTGCTCTCTAGTCTTCTGTCATCACCTTCAGCCCTTCAC(((((((..((...(((((.....-<<<<<<<<<<<<<<<<<<<<.((.(((((.(((((...........))))).))).)).)).))}}}}}}}=}}}}}}}}}}}}})))....)))))))))	GCTCTCTAGTCTTCTGTCATC(22)	-	21	126	-57.1	-45.3175
ptc-miR156i	TTGACAGAAGATAGAGAGCAC	83296	98.57	scaffold_12	4332130	4332150	GGGAGTTGTGTGGAGAGGAGGCACTTGTGATGTTGTTGACAGAAGATAGAGAGCACAGATGATGTTTTGCAGTAGACTCTGGATCTCACTCCTTTGTGCTCTCTATGCTTCTGCCATCACCTTCAGCCCCGACCCCCAGTCCCC(((..(((.(.((...((.(((....((((((...--<-<<<<<<<<<<<<<<<<<(((.((((...(.(((......))).)...)).)).)))))))))))))).))))))))))))).....)))))...))))))..)))	NO	-	21	144	-57.7	-40.0694
ptc-miR156j	TTGACAGAAGATAGAGAGCAC	83296	98.57	scaffold_15	4013709	4013729	GGGGGAGAAGGAGGCACTGGTGATGTTGTTGACAGAAGATAGAGAGCACAGATGATGATATGCAATGGACTCTGCATCCCACTCCTTTGTGCTCTCTATGCTTCTGTCATCACTTTCAGCCCCGACCCCCTCCTCCTCCTCCTCC(((((((.((((((....((((..((((-<<<<<<<<<<<<<<<<<<<<(((.((((..(((((........)))))..)).)).)))))}}}}}}}}}=}}}}}}}}}==.....))))..).)))....)))))).)))))))	GCTCTCTATGCTTCTGTCATC(13)	+	21	145	-71.4	-49.2414
ptc-miR156k	TGACAGAAGAGAGGGAGCAC	16	84.21	scaffold_11	11956186	11956205	TAGGGCTTGAATGAGAGGGAGAGAAGAAGAGAAGAGGTGTGAGGTTATGCATGCTGACAGAAGAGAGGGAGCACAACCCTGTAATAGCTAAAGAGAGTCTTTGCTTTTGTTGGACTGTGCTTTCTCTTCTTCTGTCACCAACCAACACAGTATCTTCTCTCTGATCTGATGTGATCCACTA(((((.(((.((.(((.((((((((((.........((((..(((......((.<<<<<<<<<<<<<--<<<<<(..((..(((.(((.((((.....))))))).)))..))..))))))..))).)))))))))).))))).))))....))))))))))..))).)).))).)).)))	NO	-	20	181	-70.12	-38.7403
ptc-miR159b	TTTGGATTGAAGGGAGCTCT	671	50.72	scaffold_15	4261837	4261856	TGGAGCTCCTTGAAGTCCAATAGAAGCTCCTGCTGGGTAGATCGAGCTGCTGAGCTATGAATCCCACAGCCCTATCACCATCAGTCATTTTGATGGGCCTGCGGCTTGCATATCTCAGGAGCTTTATTACCTAATGTTAGATCTTTTTTTGGATTGAAGGGAGCTCTA(({{{{{{{{{=={{{{{{{={((((.((..(((((((((...(((((.(((((.((((....((.(((.(((((((.............))))))).))).))....)))).))))).)))))..)))))))..))..)).)))))->>>>>>>-->>>>>>>>>>)	GAGCTCCTTGAAGTCCAATA(1) AGCTCCTTGAAGTCCAATAG(1)	+	20	168	-74.32	-44.2381
ptc-miR159c	TTTGGATTGAAGGGAGCTCT	671	49.12	scaffold_12	4086345	4086364	GGGAGTGGAGCTCCTTGAAGTCCAATAGAGGTTCTTGCTGGGTAGATTAAGCTGCTAAGCTATGGATCCACAGTCCTATCTATCAACCGAAGGATAGGTTTGCGGCTTGCATATCTCAGGAGCTTTATTGCCTAATGTTAGATCCCTTTTTGGATTGAAGGGAGCTCTAAACCC(((..(({{{{{{{{{=={{{{{{{={((((.(((.(((((((((...(((((.((.((.((((.(.((.(((.(((((((.((....)).))))))).))).))..).)))).)).)).)))))..)))))))..)).)))..))))>>>>>>>>-->>>>>>>>>>)..)))	GAGCTCCTTGAAGTCCAATA(1) AGCTCCTTGAAGTCCAATAG(1)	-	20	174	-77.1	-44.3103
ptc-miR160a	TGCCTGGCTCCCTGTATGCCA	22	91.67	scaffold_1	43414069	43414089	AGAAGAAGGTGACATGGGTTATGCCTGGCTCCCTGTATGCCACAAGCAAAGACCAATCTTTTGTTTTAGATTGGCTGTTGCCGGTGGCGTGCGAGGAGCCAAGCATACTCTCTCTTTCTCT(((.(((((.((...((((.(<<<-<<<<<<<-<<<<<<<<<(..((((((.(((((((........))))))))).))))..)))}}}}}}}=}}}}}}}=}}}}}))))).))))))))	GCGTGCGAGGAGCCAAGCATA(12)	+	21	121	-62.4	-51.5702
ptc-miR160b	TGCCTGGCTCCCTGTATGCCA	22	95.65	scaffold_8	2253438	2253458	ACCATGCATCCATATATATTATATGTGCCTGGCTCCCTGTATGCCATTTGCAGAGCCCAACGGATCCTCGATGGCCTCCGTGGATGGCGTATGAGGAGCCATGCATATTCGCATGTATATTATACATGGT((((((.....((((((((...(((<<<-<<<<<<<--<<<<<<<<((..(.(((.(((.(((....))).))).))).)..))))}}}}}}==}}}}}}}=}}}}})....))))))))....))))))	GCGTATGAGGAGCCATGCATA(2)	-	21	130	-63.1	-48.5385
ptc-miR160c	TGCCTGGCTCCCTGTATGCCA	22	95.65	scaffold_10	19585222	19585242	CCATCATGCATCCATATATATTATATGTGCCTGGCTCCCTGTATGCCATTTGCAGAGCCCACCGGTTCTTCGATGGCCTCCGTGGATGGCGTATGAGGAGCCATGCATATTCACATGTATATATCCATGGTTTTCACTTGCAGATGG(((((.((((.((((((((((...(((<<<-<<<<<<<--<<<<<<<<((..(.(((.(((.(((....))).))).))).)..))))}}}}}}==}}}}}}}=}}}}})......)))))))....)))........)))))))))	GCGTATGAGGAGCCATGCATA(2)	+	21	147	-66.6	-45.3061
ptc-miR160d	TGCCTGGCTCCCTGTATGCCA	22	91.67	scaffold_11	17793905	17793925	GCATCGAAGAAGGAGGTGAAATGGGTTATGCCTGGCTCCCTGTATGCCACAGCAAAGACCAATCTCTTCTGTCTTAGATTGGCTGCTGCCGGTGGCGTGCGAGGAGCCAAGCATACTCTCTCCTTTCTATCTCTATGT((((.((.((((((((.((...((((.(<<<-<<<<<<<-<<<<<<<<<(.(((.((.(((((((..........)))))))))..)))..)))}}}}}}}=}}}}}}}=}}}}})))..)))))))).)))).))))	GCGTGCGAGGAGCCAAGCATA(12)	-	21	138	-63.4	-45.942
ptc-miR162a	TCGATAAACCTCTGCATCCAG	263	96.69	scaffold_12	5079402	5079422	GGTGGTTGGGAAGACACTGGAGGCAGCGGTTCATCGATCTCTTCCTGGCCAATTTTTTGTTTAGCACGAAAAACATGAACCGATCGATAAACCTCTGCATCCAGCGCTTCCTTTATTCCCC((.((..((((((.(.(((((.((((.((((.(((((((..(((.((.....((((((((.....)))))))))).)))..))>>>>>->>>>->>>>->>>>>.))))))).....))))	NO	+	21	121	-48.4	-40
ptc-miR162b	TCGATAAACCTCTGCATCCAG	263	95.29	scaffold_15	6727328	6727348	ATGTAAAGAAGAGATTGCTTTTGAGTTTGGTTGAGAAGACACTGGAGGCAGCGGTTCATCGATCTTTTCCTGAAGATTTTTTTGTTTTACACGAACAACACGAACCGATCGATAAACCTCTGCATCCAGTGCTTCCCTTACTCCACTTTTTTTTCTTTTCAT(((.((((((((((..(.....((((..((....((((.(((((((.((((.((((.(((((((..(((.((.........((((((.....)))))))).)))..))>>>>>->>>>->>>>->>>>>))))))))..))))..)..)))))))))).)))	NO	+	21	162	-56.2	-34.6914
ptc-miR164a	TGGAGAAGCAGGGCACGTGCA	2901	99.04	scaffold_2	16570537	16570557	GGGCGAGCGGTTCCTTGCTGGAGAAGCAGGGCACGTGCAAAATCCTGATGAAGTGCTTACACTTTGCACGCGCTCTTCTTCTCCAACACGGGCTCCTCACCT(((.(((.(((.((.((.<<<<<<<<-<<<<<-<<<<<<(...........((((....))))))))))).))))).)))))))).)).))))).))).)))	NO	+	21	102	-46.9	-45.9804
ptc-miR164d	TGGAGAAGCAGGGCACGTGCA	2901	99.04	scaffold_14	9081121	9081141	GCCAACCAAGGGAATGGAATTCTGATGGGTGGGTGGCTCACGCTGGAGAAGCAGGGCACGTGCAAAATCCTTCTCGGCTTCCAGATGCTGATGAAGCACTCTTTGCACGTGCTCCCCTCCTCCAACATGAGTTCCTCACCCCTGTCTCTCTTCAGTCTCCATTGCTGAAAGC((.......((.((((((...((((.(((((((..(((((.(.<<<<<-<<--<<<<<<<<<<<((...(((((((((........))))).)))).....)))))))))))))..)).))))).).)))))..)))))))..........))))..)))))).))....))	NO	+	21	172	-75	-43.6047
ptc-miR166a	TCGGACCAGGCTTCATTCCCC	150	85.23	scaffold_1	8837365	8837385	GAAATGGAAGCTATTTCTTTTGAGGGGAATGTTGTCTGGCTCGAGGTCACTAATGGGATCTATGATTTTATCTCAATTGATTGATTTTCTTTTAAATTCTAGTAAATTGAATTGAGAGATATCATGATCAACTTATATTTAATGATGTCGGACCAGGCTTCATTCCCCCCAATTGTTTCTTCCTTTC((((.(((((......(..(((.(({{{{{{=={{{{{{=={{{={(((..((((.((((.(((((....(((((((...(..((((.((..........)).))))..))))))))...)))))))))......))))...)))).>>>-->>>>>>-->>>>>>>>.)))..)...)))))))))	GGAATGTTGTCTGGCTCGAGG(4)	+	21	187	-63.8	-34.1176
ptc-miR166b	TCGGACCAGGCTTCATTCCCC	150	56.82	scaffold_2	2744865	2744885	TCTTTCTCCTCTTTCGCATGTATTAACTGTTGAGGGGATTGCTGTCTGGTTCGATGTCATTCATGTGAAGCTTTAACATTAATGTAGTATTGAGTGATTTCGGACCAGGCTTCATTCCCCCCAACTATATTTGTTTAGCATTCGGAGGGTGTAATAAGA((((...(.(((((((.((((...(((.((((.(((((.((..(((((((((((.((((((((.(((..((.(((....))).))..))))))))))).>>>>>>>>>>>-->>->>>>>.)))).......)))..)))).))))))).)....))))	NO	+	21	159	-57.8	-36.3522
ptc-miR166c	TCGGACCAGGCTTCATTCCCC	150	85.23	scaffold_2	13513596	13513616	GGGAGCATCTTTTTTTGAGGGGAATGTTGTCTGGCTCGAGGACTCTTTCTTGATCAGTCTGATCAAGTGTTCTATCTTTAGATCTAATATCTTAGATCATGTGTTAGGGTCGTCGGACCAGGCTTCATTCCCCCCAATTATTGCTTCC(((((((....(..(((.(({{{{{{=={{{{{{=={{{={(((((..(((((((.....))))))).............(((((((....))))))).......)))))).>>>-->>>>>>-->>>>>>>>.)))..).)))))))	GGAATGTTGTCTGGCTCGAGG(4)	+	21	148	-67.1	-45.3378
ptc-miR166e	TCGGACCAGGCTTCATTCCCC	150	56.82	scaffold_5	22785321	22785341	CCTCACCCCATCTCTCCCTCTCGCGTATTAACTGTTGAGGGGATTGTCGTCTGGTTCGATGTCATTCATGAGAAGCTCAAACATAAACGTAATATTGAATGATTTCGGACCAGGCTTCATTCCCCCCAACAATGTTTGATTAGCGTTCACAGAATGGATTGAGG(((((..((((.(((......(((.....((((((((.(((((.((..(((((((((((.((((((((.(((...)))..((......)).....)))))))).>>>>>>>>>>>-->>->>>>>.)))))..)))......))).....)))))))..)))))	NO	-	21	164	-63.8	-38.9024
ptc-miR166h	TCTCGGACCAGGCTTCATTCC	1490	86.08	scaffold_10	9569714	9569734	TGATTGCTACACAGTTGAGGGGAATGCTGTCTGATTCGAGACCATTCACTTTAAGCACACATTCATCTTTCGAATGATCTCGGACCAGGCTTCATTCCCCCCAACTCAAAATCA(((((.......(((((.((((((((..(((((.(((((((.(((((........................))))).>>>>>>>->>>>>-->>>>>>)).)))))...)))))	NO	+	21	114	-43.06	-37.7719
ptc-miR166i	TCGGACCAGGCTTCATTCCCC	150	74.63	scaffold_12	2466425	2466445	GGAAGCTTGTCTTTTGAGGGGAATGTTGTTTGGTTCAAGGCCTGGCCACCCCATGTCTTGGAATTTAAAATATCATGTCCTCGGACCAGGCTTCATTCCCCTCAATTACTGCTTCC((((((..((...(((({{{{{{{{=={{{{{{{{{={(((.(((.....))).)))).(((...............)))-->>>>>>>>>-->>>>>>>>))))..)).))))))	GGGGAATGTTGTTTGGTTCAA(1)	-	21	116	-50.16	-43.2414
ptc-miR166j	TCGGACCAGGCTTCATTCCCC	150	85.23	scaffold_14	7398300	7398320	GGTAGCTTCTTTTTTGAGGGGAATGTTGTCTGGCTCGAGGACTTTTTGTTCATCAATCTAATCGAACTTTCTACCTGTAGATCTAGTATCTTATTTAAGATTGATCACGTATTAGGGTTGTCGGACCAGGCTTCATTCCCCCCAATCATTGCTTCC((.(((.......(((.(({{{{{{=={{{{{{=={{{={(((((.(((..((((((((((..(((((.((((....))))...))).))....)).)))))))).)))....)))))).>>>-->>>>>>-->>>>>>>>.))).....))).))	GGAATGTTGTCTGGCTCGAGG(4)	+	21	156	-55.3	-35.4487
ptc-miR166k	TCGGACCAGGCTTCATTCCCC	150	85.23	scaffold_14	7412333	7412353	GGTAGCTTCTTTTTTGAGGGGAATGTTGTCTGGCTCGAGGACTTTTTGTTCATCAATCTAATCGAACTTTCTACCTGTAGATCTAGTATCTTATTTAAGATTGATCACGTATTAGGGTTGTCGGACCAGGCTTCATTCCCCCCAATCATTGCTTCC((.(((.......(((.(({{{{{{=={{{{{{=={{{={(((((.(((..((((((((((..(((((.((((....))))...))).))....)).)))))))).)))....)))))).>>>-->>>>>>-->>>>>>>>.))).....))).))	GGAATGTTGTCTGGCTCGAGG(4)	+	21	156	-55.3	-35.4487
ptc-miR166l	TCGGACCAGGCTTCATTCCCC	150	74.26	scaffold_15	541786	541806	GCTAGCTAGGAAGCTTAACTTTTGTGGTGAATGTTGTCTGGTTCAAGGCATGGCCACCACATCTCTTGGTGAATATATGTCCTCGGACCAGGCTTCATTCCCCTCAATTAATGCTTCCATACATGC((......((((((((((...(((.((.(((((..(((((((((.(((((((..(((((.......)))))....)))).))>->>>>>>>>>-->>>>>->>.))))))).))))))......))	NO	-	21	126	-49.2	-39.0476
ptc-miR166m	TCTCGGACCAGGCTTCATTCC	1490	86.43	scaffold_15	5751477	5751497	AAGGGCGTGTTGTTTTAGGAAAGTGAGGATGTGGGGGAATGTCGTCTGACTCGAGACAACAGGTAAACTGAAGGAATGGCCGGAGTTTAAGAGTTCTCTCGGACCAGGCTTCATTCCCCTCATCCACACCTTCTCCTCCTCGACCTT((((.((.(..(.....((((.(((.(((((.(({{{{{{{=={{{{{=={{{{{(.(((...((((((...((.....))..))))))...))).>>>>>>-->>>>>-->>>>>>)))))))).))).)))).)..).)).))))	GGGAATGTCGTCTGACTCGAG(1)	-	21	147	-57.8	-39.3197
ptc-miR166q	TCTCGGACCAGGCTTCATTCC	1490	95.64	scaffold_7	3116846	3116866	GTTGAGAGGAATGTTGTCTGGCTCGAGGTCATTGAGGCCATGATTATACAGACATGGCATTACCTGATGACAGCCGAGAAAATTCAAAGTCTGTGTGTATCTTGTACCTCGATGATTCTCGGACCAGGCTTCATTCCTTCCAAC((((..({{{{{{=={{{{{{=={{{{{(((((((((.((.((((((((((((..(((..............)))..((....))...))))))))).))).))..))))))))).>>>>>-->>>>>>-->>>>>>)..))))	GGAATGTTGTCTGGCTCGAGG(4)	-	21	144	-65.84	-45.7222
ptc-miR167a	TGAAGCTGCCAGCATGATCTA	54	91.53	scaffold_2	3062256	3062276	TCGTGCACCACTAGCAGTTGAAGCTGCCAGCATGATCTAACTTCCTTGCTTCTTTATCAAGGATGGATTTAGATCATGTGGTGGTTTCACCTGTTGATGGCACCACGG(((((..(((.((((((.<<<<<<--<<<-<<<<<<<<<(((((((((.........)))))).))..)))))))))))))..)))))).)))))).)))...)))))	NO	-	21	108	-49.4	-45.7407
ptc-miR167b	TGAAGCTGCCAGCATGATCTA	54	88.52	scaffold_2	3064853	3064873	GTTCACTAGGGAAAAAGTGAAGCTGCCAGCATGATCTATCTTTGGTTAGAGAAAGAAAGGACTAACCCTAGCTAGGTCATGCTGTGACAGCCTCACTCCTTCCTATTTGGGGAC((((.((((((((..((<<<-<<<<<<<<<<<<<<<<<.((..((((((............))))))..)).)))))))))))).).)))).)))))..)))))...)))))))	NO	-	21	114	-49.9	-43.7719
ptc-miR167c	TGAAGCTGCCAGCATGATCTA	54	91.53	scaffold_5	22458172	22458192	GTTGATCATCTCTCGTGCACCACTAGCAGTTGAAGCTGCCAGCATGATCTAAATTAACCTCCTTCTTTATCAAGGATGGATTAGATCATGTGGTAGTTTCACCTGCTGATGGCATCACGAAAAAACCCTAGC((((........(((((..(((.((((((.<<<<<<<<<<<-<<<<<<<<<(.....(((((((.......))))).)).))))))))))))))))))))).)))))).)))...)))))........))))	NO	+	21	132	-53.7	-40.6818
ptc-miR167d	TGAAGCTGCCAGCATGATCTA	54	90	scaffold_5	22447930	22447950	GTGGTTAAAAGAAGTTCACAAGGGAAAAGGTGAAGCTGCCAGCATGATCTATCTTTGGTTAGAGAAGGATAGAAGCGAAAGAACTAACCCTAGCTAGGTCATGCTCTGACAGCCTCACTCCTTCCTATTTGGGGACCCAT((((.........((((.((((((((..((<<<-<<<<<-<<<<<<<<<<<.((..((((((.............(....)..))))))..)).)))))))))))..).)))).)))))..)))))..))).))))))))	NO	+	21	140	-47.76	-34.1143
ptc-miR167e	TGAAGCTGCCAGCATGATCTGA	56	46.28	scaffold_5	3575889	3575910	GAGCGGATAGACCTAATCATGCACCACTAGTAGTTGAAGCTGCCAGCATGATCTGAACTTTCCTTAATTTTCCTATACGGGAAAGACTAGATCATGTGGTAGTTTCATCTATTGATGGTAGCATGGGAAACCCTAATCAGCTT((((.(((((......((((((((((.((((((.<<<<<<<<<<<-<<<<<<<<<-.(((((((..............))))))).=}}}}}}}}}}}}}}}}}}}}.)))))).)))).))))))......)).))).))))	CTAGATCATGTGGTAGTTTCA(1) AGATCATGTGGTAGTTTCATC(2)	+	22	143	-61.64	-43.1049
ptc-miR167f	TGAAGCTGCCAGCATGATCTT	6	54.55	scaffold_10	10015972	10015992	TCGTGCACCTCTATCAGTTGAAGCTGCCAGCATGATCTTAGCCTTCCTCCTTTGTTGAGGAAAGAAACAGATCATGTGGCAGTTTCACCTGTTGTTGGTATCACGA(((((.(((..((.(((.<<<<<<<<<<<-<<<<<<<<-..(.((((((.......)))))).)....))))))))))))))))))).))).))..)))..)))))	NO	-	21	106	-49.1	-46.3208
ptc-miR167g	TGAAGCTGCCAGCATGATCTT	6	54.55	scaffold_8	10561914	10561934	TCGTGCACCACTATCAGTTGAAGCTGCCAGCATGATCTTAACCTCCCTCCTTTGTCGAGGAAAGAACAGATCATGTGGCAGTTTCACCTGAAGTTGGTATCACGA(((((.((((((.((((.<<<<<<<<<<<-<<<<<<<<-......((((.......)))).......))))))))))))))))))).)))))).))))..)))))	NO	+	21	105	-48.74	-46.419
ptc-miR168a	TCGCTTGGTGCAGGTCGGGAA	2209	98.62	scaffold_3	4412399	4412419	TTACCGGCGGTCTCTGATTCGCTTGGTGCAGGTCGGGAACTGATTCGGCGATTTGATTGCCAGATGGCTCGACATGACTGGTTGTTGTGGAAAAAGAAAAGGAAGGAAACAGGAAAAAAAACAAAGAATAGCGAATTGGATCCCGCCTTGCATCAACTGAATCGGAGGCCGCGGTGA((((((.(((((((((((<<<-<<<<<<<<<<-<<<<<-(..(((((.(..((((...(((....)))....((..((.....))..))...............(....)...........)))).....))))))==}=}}}}}=}}}}}}}}}}=))))))))))))))))))))	TGGATCCCGCCTTGCATCAAC(4) TCCCGCCTTGCATCAACTGAA(2) CCCGCCTTGCATCAACTGAAT(240) CCCGCCTTGCATCAACTGAA(2) CCGCCTTGCATCAACTGAAT(1)	-	21	177	-78.6	-44.4068
ptc-miR168b	TCGCTTGGTGCAGGTCGGGAA	2209	98.57	scaffold_4	22942314	22942334	TTACCGGCGGTCTCTAATTCGCTTGGTGCAGGTCGGGAACTGATTCGGCGATTTGATTGCCAGATGGCTAAACACGATTGGCTGTGAGGCAAATTATAAAAAGAAAGAGAATTGGATCCCGCCTTGCATCAACTGAATCGGAGACCGCGGTGA((((((.(((((((..((<<<-<<<<<<<<<<-<<<<<-(..((((..(....((((((((..((((((((......))))))))..))).)))))......).....))))==}=}}}}}=}}}}}}}}}}=)))))..)))))))))))))	TGGATCCCGCCTTGCATCAAC(4) TCCCGCCTTGCATCAACTGAA(2) CCCGCCTTGCATCAACTGAAT(240) CCCGCCTTGCATCAACTGAA(2) CCGCCTTGCATCAACTGAAT(1)	-	21	153	-72.8	-47.5817
ptc-miR169a	CAGCCAAGGATGACTTGCCGA	53	94.64	scaffold_1	3089924	3089944	GCACAAAGTGGTATGCAGCCAAGGATGACTTGCCGACTTAACTGATCTGTATAAATTAATGCATGTGTAGTCAAAATTACTACTACTATATATTAATCTGATCTGTGACCACAAATTAACTAACTACTAGCTAGTAATTAGTTGGCAAGTTGTCCATGGCTACATGCTGCTTTTTGC(((.((((..(((((-<<<<<-<<<--<<<<<<<<<((..((((....(((...(((((((.(((((((((.......))))).)).)).))))))).((((.(((....))).))))......)))....))))....)))))))))))..))).))))).)))))..)))).)))	NO	-	21	177	-63.3	-35.7627
ptc-miR169c	CAGCCAAGGATGACTTGCCGA	53	94.64	scaffold_19	4971730	4971750	GCCTTGCATGGAGGCTCATAAAGTTTGATGCAGCCAAGGATGACTTGCCGACGACTCAATTTTTGCTTCCATATGGTAGAAGAGATGAATAGGTTGGCAGGTTTTCCTTGGCTACATTTTCCTTTCTGCTCCTCCTGCTAGGT((((.(((.(((((..((.((((...((((-<<<<<<<<<-<<<<<<<<<<(.(.(((.(((((.((.((....)).))))))).))).)..))))))))))).))))))))).))))...)))).))..)))))))).))))	NO	-	21	143	-65.6	-45.8741
ptc-miR169d	CAGCCAAGGATGACTTGCCGG	49	94.23	scaffold_6	5569370	5569390	GGTCTAGGAGTTTTGCATGAAGAGGTAGAGAGTCGAATGCAGCCAAGGATGACTTGCCGGCATTTCCTCCTAAGTAGCGAGCCCGGCAAGGCTTCTATTTGGCACGCCCGGCCGGCGGGTTGTCCTTGGCTATATTTGGTTCCCTTCTTCTCATGTGAAACTCCAGGCC(((((.(((((((..(((((.((((.((.((..((((((-<<<<<<<<<--<<<<<<<<<(........((((((((.(((((......)))))))))))))........)))}}}}}}}==}}}}}}}}}=}}))))..)).)).)))))))))..))))))))))))	GGCGGGTTGTCCTTGGCTATA(23) GGCGGGTTGTCCTTGGCTAT(22)	-	21	169	-98.69	-58.3965
ptc-miR169g	CAGCCAAGGATGACTTGCCGG	49	94.23	scaffold_414	13080	13100	GGTGTAGGGGTTTTGCATGAAGAGGTAGAGAGTAGAATGCAGCCAAGGATGACTTGCCGGCATTTCCTCCTAGGTAGCTAGCAAGCCTTCTATTTGGCATGCCTGTCCGGCAGGTTGTCCTTGGCTAAATTTTGTTCTCTTCTTCTCATGTGAGACTCCAGGCC(((.(.(((((((..(((((.((((.((((((((((((.-<<<<<<<<<--<<<<<<<<<((...((.....))......(((.(((........))).))).)).)))))))))..)))))))))..)))))))))))).)))))))))..)))))))).)))	NO	+	21	164	-88.2	-53.7805
ptc-miR169h	CAGCCAAGGATGACTTGCCGG	49	61.25	scaffold_6	26618439	26618459	GGGGCTTACATGAAGAGGTAGAGAGTGTAATTCAGCCAAGGATGACTTGCCGGCAGCACGGGATCTCAGAGCTTAATAACTAGAAGATCAAGGCTGTCATTACTTTTCCGGCCGGCAAGTTGCCCTTGGCTACATTGTACTCTCTTCTTCTCATGTAAGGCCT(((.(((((((((.((((.((((((((((((.-<<<<<<<<--<<<<<<<<<<((((.(..(((((...((........))...)))))..))))...............)))}}}}}}}}==}}}}}}}}==}))))))))))).))))))))))))).)))	GGCAAGTTGCCCTTGGCTACA(1) GGCAAGTTGCCCTTGGCTAC(1)	+	21	163	-81.16	-49.7914
ptc-miR169j	TAGCCAAGGATGACTTGCCTG	22	88	scaffold_1	31302265	31302285	TGAGAGGAAGGGAGGCCTTACATGAAGACAAGAGTCTTGTTTGATAGCCAAGGATGACTTGCCTGCTACTTGCAAGAGTTTCTGCAAAGAGATCAGAACCAAATATGCATGGAATTATATGTAATGAAACTCTTGTTTGATTGCCAGGCAGTCTCCTTGGCTAGCCTGACAGGCTCTTCTCTCTCATGCTAGGCCTTCTCTTCTTCCA((.(((((((((((((((..((((((((.((((((((.(((...<<<<<<<<<<-<<<<-<<<<<(..(..(((((((((((......(....)...........((((((......))))))..)))))))))))..)...).)))))))))))))))))))....))))))))))).))).)))))..)…	NO	-	21	208	-98	-47.1154
ptc-miR169n	TGAGCCAAGGATGACTTGCCG	278	91.15	scaffold_18	14341657	14341677	ATCTTGCATGAAGTGATAGAGAGTGGATTTGAGCCAAGGATGACTTGCCGCAGATGCATGGTCCTTGCTGCTGATCACATACCAAGGGGGGTTTTGGGTGGCAAGCATCCTTGGTTCTCCTTCGCTCTGTATTTCCTCATGCGAGAT(((((((((((.(.((((.((((((((..-<<<<<<<<<<<<-<<<<<<<(.((.((....((((((.((.((....)))).))))))..)).))..)}}}}}}}}}}}}}}}}}}}==.)))))))).)))).).)))))))))))	TGGCAAGCATCCTTGGTTCTC(1)	-	21	147	-73.5	-50
ptc-miR169q	TAGCCAAGGACGACTTGCCTGT	11	50	scaffold_1	27741721	27741742	GAGAGACCTAACATGAAAATAAGAGTCTTGTTAGTTAGCCAAGGACGACTTGCCTGTTCCTAGCAATTTGGGATTTGCCCTGGACTAAGAGGCAGGACCCTCATTCCGGGTTTCAGGCAGTCTCCTTGGCTAGGTTGACAGGCTCTTCTTTGTCATGCCAGGCCTTCTC(((((.(((..((((((((.((((((((.((((.(<<<<<<<<<<-<<<<-<<<<<-.((..(.(((..(((.((((((((......)).)))))).)))..))))..))...)))))))))))))))))))).).))))))))))).))).)))))..)))..)))))	NO	+	22	169	-78.4	-46.3905
ptc-miR169s	CAGCCAAGGATGACTTGCCGG	49	54.44	scaffold_18	3350295	3350315	TTGCCTTGGGGGCTTGCATGAAGAGGTAGAGAGTGTGATTCAGCCAAGGATGACTTGCCGGCAGCAGGTAAGAGCAAAGCTCCGTTTTTGGAAGTTCAAGGATATCTTAACTTTTCCGGCCGGCAAGCTGTCCTTGGCTACATTGTACTCTCTTCTTCTCATGCAAGAACTACTTGGTAA(((((...((..(((((((((.((((.((((((((..((.-<<<<<<<<<<--<<<<<<<<(....((.(((((..(((....((((((((....))))))))..)))..))))))).)))}}}}}}==}}}}}}}}}}==))..)))))))).)))))))))))))..))....)))))	GGCAAGCTGTCCTTGGCTAC(1)	-	21	180	-91	-50.5556
ptc-miR169u	TAGCCAAGGACGACTAGCCTA	1521	97	scaffold_15	12079420	12079440	GGAAGAGAGGTCTTGTATGAAGATGAAGAGGTAGAGAGTTTGGTAGCCAAGGACGACTAGCCTATTTCCTCCATTGGGTTCTCAAAAGAATGAAATGTCGTTCAGAGCTCACTGGTAGGGTTCATAGGCAGTCTCCTTTGGCTATCCTAACTGGCTCTCATTTTTCATGCTAGACCTACATCTCTTCT(((((((((((((.((((((((((((.(((.(((..((...((<<<<<<<<<<-<<<<-<<<<<(.(((((((.((((((((.....((((((....)))))))))))))).))).)))).==}}}}}}}}}}}}}=}}}}}))))))..))).)))))).))))))))).)))))....))))))))	TCATAGGCAGTCTCCTTTGGC(1) TAGGCAGTCTCCTTTGGCTA(1) AGGCAGTCTCCTTTGGCTATC(1) GGCAGTCTCCTTTGGCTATC(1)	+	21	188	-89.4	-47.5532
ptc-miR171a	TGATTGAGCCGTGCCAATATC	12	48	scaffold_4	764814	764834	GTTTCTTCAGAGAAAACGGGATATTGGTACGGTTCAATCAGAAAGTAATGCTCCCAAAAGTATAGAGTACTATTGTTTGATTGAGCCGTGCCAATATCACGTACACTCATCTTCCTCTCGAGGAAC(((((((.((((.(((((={{{{{{{{{{{{{{{{{{{{(((.((((.(((((...........))))).)))).))>>>>>>>>>>>>>>>>>>>>>.))).........)).)))).)))))))	GGATATTGGTACGGTTCAATC(9)	+	21	126	-54.3	-43.0952
ptc-miR171b	TGATTGAGCCGTGCCAATATC	12	48	scaffold_21	325798	325818	GTCAACATAATTATATATAACGAGATATTGGTGCGGTTCAATCAGATAGTAATGCTCCATAAGCATAGAGCTCTATTGTTTGATTGAGCCGTGCCAATATCACGTATATGTTGC(.(((((((..........(((={{{{{{{{=={{{{{{{{{{((((((((..((((.((....)).))))..)))))))>>>>>>>>>>>-->>>>>>>>.))).))))))))	AGATATTGGTGCGGTTCAATC(3)	+	21	114	-53.5	-46.9298
ptc-miR171c	TTGAGCCGCGCCAATATCACT	18	48.65	scaffold_6	4686636	4686656	GCTGGATGCTAAGGAGGCAAAAGAAAGCGATGTTGGTGAGGTTCAATCCGAAGACGGATTTACACGTGAAAGTAATTGTAAAATACGATCTCAGATTGAGCCGCGCCAATATCACTTTCTCAGGGTTATTTGCTTTCCCAGC(((((.......(((((((((((((((={{{{{{{{{{={{{{{{{{{.((.((((..((((((.((.......))))))))...)).)))).))>>>>>>>->>>>>>>>>>->>))))........))))))))))))))	CGATGTTGGTGAGGTTCAATC(15)	-	21	142	-56.41	-39.7254
ptc-miR171d	TTGAGCCGCGCCAATATCACT	18	48.65	scaffold_18	13263748	13263768	GAAAGCGATGTTGGTGAGGTTCAATCCGAAGACAGATTTACACGAGTGAAAGTAAAATCCGATCTCAGATTGAGCCGCGCCAATATCACTTTT(((((={{{{{{{{{{={{{{{{{{{.((.(((.(((((..((........)).))))).).)))).))>>>>>>>->>>>>>>>>>->>)))	CGATGTTGGTGAGGTTCAATC(15)	-	21	93	-37.7	-40.5376
ptc-miR171e	TGATTGAGCCGTGCCAATATC	12	92.31	scaffold_1	31797196	31797216	AATTTGATGTTGGCAGAGCTCAATCAAATCAAAGCACTCAATGGTTGGGTTCTTTCATCTGATTGAGCCGTGCCAATATCGCATT(((.(((((((((((..(((((((((.((.((((.(((((.....))))).)))).)).>>>>>>>>>-->>>>>>>>>>).)))	NO	-	21	85	-37.8	-44.4706
ptc-miR171f	TGATTGAGCCGTGCCAATATC	12	92.31	scaffold_2	908913	908933	GTGCTTGAAAGTGTCATTGCGATGTTGGCCCGGTTCACTCAGAGAAAAGACACCATTTTTTTTCAAGAAGATCATCAAAGCTTGAAAGAATAATGGTGGTCGGTCGTCTCTGATTGAGCCGTGCCAATATCTTAGTGCTCTTTCATTTAT(((..((((((.(.(((((.(((((((((.(((((((.(((((((...(((((((((((((((((((..(.....)....)))))))))).)))))).))).....))))>>>->>>>>>>->>>>>>>>>.)))))).))))))..)))	NO	+	21	150	-67.5	-45
ptc-miR171l	CGAGCCGAATCAATATCACTC	256	97.34	scaffold_15	654676	654696	GGAGAAGTAGACACGGTGTGATATTGGTCCGGCTCATCTTCTGTGCATAAGCATCTGAAGTTCTTCACTCATGAAGACGAGCCGAATCAATATCACTCTTGTATGCTTCTTC(((((((((.(((.((={{{{{{{{{{{={{{{{{==((((.((((....))))..)))).((((((....))))))->>>>>>->>>>>>>>>>>->)))).)))))))))	TGTGATATTGGTCCGGCTCAT(20) GTGATATTGGTCCGGCTCATC(2) TGATATTGGTCCGGCTCATCT(6)	+	21	112	-52.5	-46.875
ptc-miR171m	CGAGCCGAATCAATATCACTC	256	97.34	scaffold_12	2197369	2197389	GGAGAAGCAGACATGGCGTGGTATTGATCCGGCTCATCTTCTGTATTTGCATCAGAAGTTCTTCGCTGAAGACGAGCCGAATCAATATCACTCTTGTACGCTTCATTC((((((((..(((.((={{{{{{{{{{{={{{{{{==((((((.........)))))).(((((...)))))->>>>>>->>>>>>>>>>>->))))..))))).)))	CGTGGTATTGATCCGGCTCAT(5)	-	21	108	-45.8	-42.4074
ptc-miR171n	CGAGCCGAATCAATATCACTC	256	97.34	scaffold_12	2201537	2201557	TTGGAGAAGCAGACATGGCGTGGTATTGATCCGGCTCTTCTTCTGTATTTGCATCAGAAGTTTTTCGCTGAAGACGAGCCGAATCAATATCACTCTTGTACGCTTCATTCTCTAA((((((((((..(((.((.(((((((((((.((((((.(((((.((....((.......)).....)).)))))->>>>>>->>>>>>>>>>>->))))..)))....)))))))	NO	-	21	115	-45.2	-39.3043
ptc-miR172b	AGAATCTTGATGATGCTGCAT	2527	98.83	scaffold_9	1730129	1730149	TCGTTGTTTGCGGGTGGAGCATCATCAAGATTCACATGCAAATGCACGGCCGGTGATGTTAAGAGTTAAATCTTTCTTTGTTTCTGTTCATCTGCCAAAGTTCTTTGGAAGTGAGAATCTTGATGATGCTGCATCGGCAATAAACGA(((((..((({={{{{={{{{{{{{{{{{{{((.(((.((((.((..(((.(((((.....((((.((((......)))).))))..))))).)))...))..))))...)))->>>>>>>>>>>>>>>>->>>).))))..)))))	CGGGTGGAGCATCATCAAGAT(1) GGAGCATCATCAAGATTCACA(14)	-	21	147	-60.6	-41.2245
ptc-miR172c	AGAATCTTGATGATGCTGCAT	2527	98.87	scaffold_10	19900051	19900071	AGTCATTGTTTGCAGGTGCAGCATCATCAAGATTCACATTCAAACAGATGTACGGCAGCTAGCTAGCTAGATAGATAGACAGCAATGTATTTCTTTGAAGGTGAGAATCTTGATGATGCTGCATCAGCCATAAATGACT(((((((....((.((({{{{{{{{{{{{{{{{{{{{=(((((..(((.(((((...(((..(((.((....)).)))..)))..))))).)))))))).)))>-->>>>>>>>>>>>>>>>>>).))....)))))))	GCAGCATCATCAAGATTCACA(2)	-	21	139	-62.1	-44.6763
ptc-miR172f	AGAATCTTGATGATGCTGCAT	2527	98.83	scaffold_4	21285315	21285335	GTCGTTGTTTGCGGGTGCTGCATCACCAAGATTCACATGCAAATGCATGGCCGATGATATATGTTAGAAATTTTTTTTATATAAAAAAGATATCTTTCTTTCTTTCTGATCATCTGCCAAAGTTCTTTGGAAGTGAGAATCTTGATGATGCTGCATCGGCAATAAACGAC((((((..((((.(((((.((((((.((((((((.(((.((((.((.((((.((((((....(..(((((((((((((....)))))))))....))))..)......)))))).))))..))..))))...)))->>>>>>>>->>>>>>->>>>).))))..))))))	NO	+	21	170	-64.2	-37.7647
ptc-miR172g	GGAATCTTGATGATGCTGCAG	31	68.89	scaffold_10	18370008	18370028	AGTCACTGTTTGCCTATGGAGCATCATCAAGATTCACAAGCTTTATTAGGGCTAGTGTGTGGTGATGATGGTGGCTTTTGGTGGTCCCTTTTTTTCAATCCAATAGCCCTTTGAATTGGGAATCTTGATGATGCTGCAGCGGCAATAAATGGCT(((((....(((((..({={{{{{{{{{{{{{{{{={{(..((((..(((((((.....((((((.((.((.((((......))))))...)).)))..))).))))))).)))))))->>>>>>>>>>>>>>>>->>-.)))))....)))))	GGAGCATCATCAAGATTCACA(14)	-	21	154	-64.4	-41.8182
ptc-miR172h	GGAATCTTGATGATGCTGCAG	31	68.89	scaffold_8	3367227	3367247	AGTCACTGTTTGCCGATGGAGCACCATCAAGATTCACAAACTTTATTAGGGCTAATAAGTGGTGATGATGGTGGCTTTTGGTGGTCCCTTCGTTTCAACCCAATAGCCATTTGAATTGGGAATCTTGATGATGCTGCAGCGGCAATAAATGGCT(((((....((((((.{{={{{{={{{{{{{{{{{={((..((((....(((((....((...(((((.((.((((......)))))).)))))...))....)))))...)))))))->>>>>>>>>>>->>>>->>-))))))....)))))	TGGAGCACCATCAAGATTCAC(1) GGAGCACCATCAAGATTCACA(1)	+	21	154	-60.6	-39.3506
ptc-miR319b	TTGGACTGAAGGGAGCTCCC	90	67.16	scaffold_3	13875486	13875505	AAGAGAGCTTTTTTCGGTCCACTTATAGATAGTAATATGATTTAATTAGTTACCGACTCATTCATCCAAATACTGAGTTATGAGCTAAGATTACCCAGTAAATGAATGAGTGATGCGGGAGACAAATTAAATCTTAAACTTCCTATCATTGGACTGAAGGGAGCTCCCTT(((.(((((((((((((((((.(.((((..(((.....(((((((((.(((.(((..((((((((.((..(((((.((.((........)).)).)))))..)).))))))))..)))..))).)))))))))....)))..)))).)->>>>>>>>>>>>>>>>>->))	NO	+	20	170	-62.1	-36.5294
ptc-miR319c	TTGGACTGAAGGGAGCTCCC	90	49.72	scaffold_13	15551447	15551466	TCATGAGAAATGGTTTAAGAGAGCTTTCTTCAGTCCACTCATGGACGGGCGAAGGGTTTGGATTAGCTGCCGACTCATTCATTCAAACACAGTAGAAATTAAGGGAGCAGTATGGCTGCTATTGTGAATGTGTGAATGATGCGGGAGATAAATTTCATCCTTTTCTTCTCTGTGCTTGGACTGAAGGGAGCTCCCTTTAATCGTTTATTCACGA((.((((((((((((.(((.{{{{{=={{{{{{{{{{=={(((((..((.(((((((..(((((..((.(((..((((((((.((..((((((............(((((.....)))))))))))..)).))))))))..))).))...))))).))))))).))..)))))).->>>>>>>>>…	GAGCTTTCTTCAGTCCACTC(1)	+	20	214	-88.2	-41.215
ptc-miR390a	AAGCTCAGGAGGGATAGCGCC	524	73.8	scaffold_1	27693961	27693981	TTGTACACACAAGTACGGGAGAATCTGTTAAGCTCAGGAGGGATAGCGCCATGAGCATGACAAAGTCTATGTTTGAGTTAATCTCAACAAAATCAATCCAGTCATCAGTGGCGCTATCTATCCTGAGTTCTATGGGTTCTCCTTACTATTCTGGTGCAG((((((.....((((.((((((((((((.-<<<<<<<<<-<<<<<<<<<<((..(.(((((........((((.(((.....)))))))...........))))))=}}}}}}}}}}}}=}}}}}}}))..))))))))))))))))......))))))	AGTGGCGCTATCTATCCTGAG(19) CGCTATCTATCCTGAGTTCTA(10) CGCTATCTATCCTGAGTTCT(3)	+	21	159	-69.71	-43.8428
ptc-miR390b	AAGCTCAGGAGGGATAGCGCC	524	80.74	scaffold_6	7867995	7868015	AGTATGGAAGAATCTGTTAAGCTCAGGAGGGATAGCGCCCTAAGGATAATCATGGGCTCTTTTTATGTGGTTTTTGATTCTCAGTGGCGCTATCCATCCTGAGTTTCATTGCTTCTTCTTGCT((((.(((((((.(.((.<<<<<<<<<<-<<<<<<<<<<((.((((...(((..(((((.......).))))..))))))).)).))}}}}}}}}=}}}}}}}}}}=}).).)))))))))))	CGCTATCCATCCTGAGTTTCA(3)	+	21	123	-53.5	-43.4959
ptc-miR390c	AAGCTCAGGAGGGATAGCGCC	524	73.91	scaffold_9	7516342	7516362	GATATGTGCATAAGTATGGGAGGATCTGTTAAGCTCAGGAGGGATAGCGCCATGAGCTGATGATAAGTTGATGTTTGATGGGTTAATCTCAACATAATCAATCTAGTCATTAGTGGCGCTATCTATCCTGAGTTCTATAGGTTCTCCTTGCTATTCCGGTACAGTTTC((..(((((...((((.((((((((((((.-<<<<<<<<<-<<<<<<<<<<....(((((((((.(((((((...((.((((.....)))).))..))))).)).))))))}}}}}}}}}}}}}=}}}}}}}))..))))))))))))))))......)))))...))	AGTGGCGCTATCTATCCTGAG(19) CGCTATCTATCCTGAGTTCTA(10) CGCTATCTATCCTGAGTTCT(3)	+	21	168	-79	-47.0238
ptc-miR390d	AAGCTCAGGAGGGATAGCGCC	524	80.74	scaffold_16	12564445	12564465	TTGATATATAGAAGTATGGAAGAATCTGTTAAGCTCAGGAGGGATAGCGCCCTAAGGATAACCATGGGCTCTTTTTATTTGGTTTTTGACTATCAGTGGCGCTATCCATCCTGAGTTTTACTGGTTCTTCTTGCTACGATCAG(((((.....(.((((.(((((((((.((.<<<<<<<<<<-<<<<<<<<<<((...((((..((..((((..........))))..))..)))))).)))))))))).)))))))))).)).))))))))))))).).)))))	NO	+	21	143	-59.6	-41.6783
ptc-miR393c	TCCAAAGGGATCGCATTGATC	41	67.21	scaffold_15	13166766	13166786	TAGTGCAGCTGGAGTGTTCCAAAGGGATCGCATTGATCTAATGACTCTCGATGTCTAAATCATATTAATGTTTAGTTTTTTCGTTGGATCATGCGATCCCTTAGGAATTTTCCAGCATTCAGCTCTA(((.((.(((((((.((<<<-<<<<<<<<<<<<-<<<<((((((.....((...(((((.(((....))))))))...)))))))))))))))))))))))).))))).))))))).....)).)))	NO	+	21	127	-56.3	-44.3307
ptc-miR394b	TTGGCATTCTGTCCACCTCC	903	97.62	scaffold_5	24701313	24701332	TCATGTGGATTTAGCAAAGGGTTTCTTACAGAGTTTATTGGCATTCTGTCCACCTCCTATCTTTAGAAATTAGAATATCTCTTTCATATGGAGGTGGGCATACTGCCAACCGAGCTCTGTTGGTCTCTCTTTGTAAAACCCTCGTGA(((((.((.(((.((((((((...((.(((((((((.<<<<<<-<-<<<<<<<<<<<.......(((.((......)).))).......))))))))))).).))))))..))))))))).))...)))))))).))).)).)))))	NO	+	20	147	-63.74	-43.3605
ptc-miR395b	CTGAAGTGTTTGGGGGAACTC	22	91.67	scaffold_6	7424478	7424498	TGCAATGGTGCATAGATCAAGTGTCCCCTAGAGTTCCCTTGAGCACTTCACTGGGACCCTTCAGACCGAAAGAGTATTATCTTTCCCACTGAAGTGTTTGGGGGAACTCCTGGTGTCATTTGATGTTAATAATTAGTTAATTGCA((((((...((..(.((((((((.(.((..(((((((((..(((((((((.(((((........(((....).))........)))))->>>>>>>>>-->>>>>>>>>..)).).)))))))).).........))..))))))	NO	+	21	145	-62.29	-42.9586
ptc-miR395c	CTGAAGTGTTTGGGGGAACTC	22	91.67	scaffold_6	8406772	8406792	TAGCATAGATCAAGTGTCCCCTAGAGTTCCTCTGAGCACTTCATTGGGAATCTTCGATTAAATGAAAGAGTATTATCATTCCTACTGAAGTGTTTGGGGGAACTCCTGGTGTCATTTGATGTTA(((((....(((((((.(.((..(((((((((..(((((((((.((((((..((((......)))).((......)).))))))->>>>>>>>>-->>>>>>>>>..)).).))))))))))))	NO	+	21	124	-52.5	-42.3387
ptc-miR395d	CTGAAGTGTTTGGGGGAACTC	22	91.67	scaffold_6	8410893	8410913	AGCATGCCATAGATCAAGTGTCCCCTAGAGTTCCTCTGAGCACTTCACTGGGAATTTCCGATCAAATGAAAGAGTATTATCATTCCTACTGAAGTGTTTGGGGGAACTCCTGGTGTCATTTGATGTTTACAAGCT(((.((....(.((((((((.(.((..(((((((((..(((((((((.(((((((......((........))........)))))))->>>>>>>>>-->>>>>>>>>..)).).)))))))).)...)).)))	NO	+	21	135	-56.04	-41.5111
ptc-miR395e	CTGAAGTGTTTGGGGGAACTC	22	91.67	scaffold_16	13792287	13792307	GAAACGCAAAGAACGTTAGCTGTCCCCCGGAGTTTCCCTGACCACTTCACTGGGGCTATAATTCTACTCTTCGTGTTTAAGGGTAGAGGCAACCCTTCCTCACTGAAGTGTTTGGGGGAACTCTGGGTGGCATTTAACACTGTTTAGCTGTC((...(((((.(..(((((.((((.(((((((((((((..(.(((((((.(((((......((((((((((.......)))))))))).........)))))->>>>>>>->-->>>>>>>>>)))).)))).)))))..).))).))..))	NO	-	21	152	-65.96	-43.3947
ptc-miR395g	CTGAAGTGTTTGGGGGAACTC	22	91.67	scaffold_16	13793518	13793538	ATCAAGTGTCCCCTAGAGTTCCTCTGAGCACTTCATTGGGGATCTTCCATCGACCTGAAAGAGTATTATCATTCCTACTGAAGTGTTTGGGGGAACTCCTGGTGTCATTTGAT((((((((.(.((..(((((((((..(((((((((.((((((((((.((......)).)))).........))))))->>>>>>>>>-->>>>>>>>>..)).).))))))))	NO	+	21	113	-51.6	-45.6637
ptc-miR395h	CTGAAGTGTTTGGGGGAACTC	22	91.67	scaffold_761	8244	8264	ATCAAGTGTCCCCTAGAGTTCCTCTGAGCACTTCATTGGGGATCTTCCATCGACCTGAAAGAGTATTATCATTCCTACTGAAGTGTTTGGGGGAACTCCTGGTGTCATTTGAT((((((((.(.((..(((((((((..(((((((((.((((((((((.((......)).)))).........))))))->>>>>>>>>-->>>>>>>>>..)).).))))))))	NO	+	21	113	-51.6	-45.6637
ptc-miR395i	CTGAAGTGTTTGGGGGAACTC	22	91.67	scaffold_16	13797943	13797963	TTATTTTTTGTTTTCGTTAATTGTTGATAGCACAGATCAAGTGTCCCCTAGAGTTCCTCTGAGCACTTCAATGGGGATCTTCCATCGACCTGAAAGAGTATTATCATTCCTACTGAAGTGTTTGGGGGAACTCCTGGTGTCATTTGATGTTACAAGCTCAGAAAACACAGTAA(((((...(((((((.......(((..(((((....(((((((.(.((..(((((((((..(((((((((.((((((((((.((......)).)))).........))))))->>>>>>>>>-->>>>>>>>>..)).).))))))))))))..)))...))))))).)))))	NO	+	21	173	-61.4	-35.4913
ptc-miR396a	TTCCACAGCTTTCTTGAACTG	8854	88.46	scaffold_6	4636177	4636197	TCTTGGTATTCTTCCACAGCTTTCTTGAACTGCACCTATTTGAATATTGTTGTTGATGTTGCCGTGCATGTACATATGACATTGTATTTTTGTTGCGGTTCAATAAAGCTGTGGGAAGATACAAACAGGA(((((((((..<<<<<<<<<<<<-<<<<<<<<((...((..((((((...((((((((((((...)))...)))).)))))..))))))..))))}}}}}}}}=}}}}}}}}}}}}..))))...)))))	CGGTTCAATAAAGCTGTGGGA(14) GGTTCAATAAAGCTGTGGGAA(1) GTTCAATAAAGCTGTGGGAAG(119) TTCAATAAAGCTGTGGGAAGA(42) TTCAATAAAGCTGTGGGAAG(110)	+	21	130	-49.6	-38.1538
ptc-miR396f	TTTCCACGGCTTTCTTGAACT	25	43.86	scaffold_6	25199498	25199518	GCACGGCTTGTAGATATATATGGGTCTCTTGGTGATTTTCCACGGCTTTCTTGAACTGTATATATTATCAATGGCTTTTTACAAGACTGGAAGATGGTTTCCATGGAGAAGAATTGTCACAAAAACAGTTCAAGAAAGCCCTGAAAAATTATTTAGAGGATCTAGTTTATATATGTCTATACAATGGCTGGC((.((((((((((((((((((((((((((..(((((<<<-<<-<<<<<<<<<<<<<<((.........((((..((((((.((....((((((....)))))))))))))).))))........)))))))))))))))).)).))))))))..))).))))).....)))))))))))))....)))))))	NO	-	21	192	-70.23	-36.5781
ptc-miR396g	TTCCACGGCTTTCTTGAACTT	114	66.28	scaffold_7	6411771	6411791	GAGAAGAAACTAAGGTCGTTGCATGCTTTTCCACGGCTTTCTTGAACTTGGCACTCAAGAGACATGAGAGTAAAGGGCTAGGCTTTCTTTTCTATTCCTTTCGTTCTTTGAAATTTTCCTGTTCAAAGAATCCATACATATCAGTCTCTTTAGTACAAAGCTCAAGAAAGCCGTGGGAAAATATGAAAGGATTTTGTGGTGTAATCTT((((....((((.((((.((.((((.((<<<<<<<<<<<<<<<<<-<<<.(.(((.(((((((.(((....(((((..((((........))))..))))).((((((((((.........)))))))))).........)))))))))).))).).}}}=}}}}}}}}}}}}}}}}})).)))).)).))…	AAGCTCAAGAAAGCCGTGGGA(1) CTCAAGAAAGCCGTGGGAAAA(4) CTCAAGAAAGCCGTGGGAAA(8)	-	21	208	-75	-36.0577
ptc-miR397a	TCATTGAGTGCAGCGTTGATG	283	96.59	scaffold_11	4146740	4146760	GTGGAGGCTTCCTGGATTGGAGAACCATCATTGAGTGCAGCGTTGATGAAATCCTCCATTTTGTGCTATTAAACTGTTACCAACCCTTTATGGGGCATGGCATCATTTCACCAGCGCTGCATTCAATCATGTTTTTCTAACTCTTCCGGGCATGGTTTTGC(..(((.(..((((((((((((((.((<-<<<<<<<<<<<<<<<<-<<((((...((((...((........)).........(((.....)))..))))....))}}}}=}}}}}}}}}}}}}}}}.))).))))))))....))))))...).)))..)	TTCACCAGCGCTGCATTCAAT(1)	+	21	161	-60.6	-37.6398
ptc-miR403a	TTAGATTCACGCACAAACTCG	139	78.53	scaffold_1419	5251	5271	GGAAGAGGCATATTTCAGGTTTGTGCATGAATCTAATATAGCTAAAAAAATCCCATCAAACACAAATTAAAATACTAGATAGCAATCAGCACTAGTTTAGTATAGTATTAGATTCACGCACAAACTCGTAATCTGTCTTTTTC((((((((((.(((.(..((((((((.((((((((((((.(((((............................(((((...((.....)).))))))))))...)))>>>>>>>>>->>>>>>>>-->.))).))))))))))	NO	-	21	143	-43.78	-30.6154
ptc-miR403a	TTAGATTCACGCACAAACTCG	139	78.53	scaffold_2	15394890	15394910	GGAAGAGGCATATTTCAGGTTTGTGCATGAATCTAATATAGCTAAAAAAATCCCATCAAACACAAATTAAAATACTAGATAGCAATCAGCACTAGTTTAGTATAGTATTAGATTCACGCACAAACTCGTAATCTGTCTTTTTC((((((((((.(((.(..((((((((.((((((((((((.(((((............................(((((...((.....)).))))))))))...)))>>>>>>>>>->>>>>>>>-->.))).))))))))))	NO	+	21	143	-43.78	-30.6154
ptc-miR403b	TTAGATTCACGCACAAACTCG	139	82.74	scaffold_10	14828063	14828083	AGAGGACTCATATCTCTAGTTTGTTCGTGGATCTGACGCCATCACAACCGTTCATTTCACGACCATCCAATGGCGTTAGATTCACGCACAAACTCGCGATCTGTCTCCTCT((((((..((.(((.(.(((((((.(((((((((((((((((......(((.......)))........))))))>>>>>>>>>>>->>>>>>>->.))).))..))))))	NO	-	21	111	-49.24	-44.3604
ptc-miR472a	TTTTCCCTACTCCACCCATCCC	19	90.48	scaffold_5	119685	119706	AGTTAACACATATGGGAGGAATGGAGAGGGAGTAGGATTTTCGGAAGGTTATCGGGTGGGTGAGCGGGGAAGATAACTTTGGTTTTTGAGATAGTACTTGTTATTTTCCCTACTCCACCCATCCCATAGGTTTCCGATCATTCCTCCCTCTCCTCATCACTCTGCTTCTCATGGCCTGTTTATCT((..((((..(((((((((...((((((((((..((((..(((((((.((((.(((((((((((..(((((((((((...(((.((......)).))).))))>>>>>>>-->>->>>>>>>>>-)))).)))))))..))))))))))))))...........)))))))))...))))...))	NO	+	22	185	-83.94	-45.373
ptc-miR472b	TTTTCCCAACTCCACCCATCCC	17	89.47	scaffold_13	103757	103778	GCAGACAGCCGCCTTGAAGTTGATGTTGGATGGGAGGAAATGGAGAGGGAGTAGGGTTTTCGGAAGGTTACTGGATGGGTGAGTGGGGAAGATAACTAAGCTCTGTTTGTTATTTTCCCAACTCCACCCATCCCATAGGTTTCCGATCATTCCTCCCTCTCCTCATCACCTCACCTCTGCTCCTCTCTCTTTACAAGTATGCTTGGTTTGC(((((((((...(((((((..((.(..(((.((((((....((((((((((..((((..(((((((.(((=={{{{{{{{{{{{={{{{{{{((((.((((...))))))))>>>>>>>->>>->>>>>>>>>-.))).)))))))..))))))))))))))......)))).)))))...).))...…	CTGGATGGGTGAGTGGGGAAGA(1)	+	22	211	-93.6	-44.3602
ptc-miRX1	TAGAGCAGATTGTAAGGGAAG	3427	94.64	scaffold_1	5198875	5198895	TGAAATCCAAGTGGACTTCCCTTACAATCTACTCTTTCAGTTTCACAGAAGATCCAGATTAGATTTTAAGGCAAACAAATTGATAGAGCAGATTGTAAGGGAAGCCCACATGGATTTCA(((((((((.((((.(((((((((((((((.((((.(((((((..(..((((((.......))))))..)......)))))))->>>>->>>>>>>>>>>>>>>.)))).)))))))))	NO	-	21	119	-56.8	-47.7311
ptc-miRX108	AAGCGCCTGTAGCTCAGTGG	8	32	scaffold_3	6832835	6832854	CCGAGTTACAGCATCAAGCGCCTGTAGCTCAGTGGATAGAGCGTCTGTTTCCTAAGCAGAAAGTCGTAGGTTCGACCCCTACCTGGCGCGTGAGTATCTTCTTTTGTCTAGTTGGGCTTCATGCTTTGCTGAAACCTGG(((.(((.(((((..<<<<<--<<-<<<<<<<<<<((((((..((((((.....)))))).....(((((.......)))))..(..((....))..)...))))))))).))))))).)))))))))))).))).)))	NO	+	20	139	-43.8	-31.5108
ptc-miRX111	TCGAATTTGGGCTTGAGATTG	638	90.37	scaffold_3	9383355	9383375	TGCAGAGTAGAAGTCGAGCTCAAGCACAAATTCGATCTTGCTTAACAAGGTACCGGCAAAGTCAGATCGAATTTGGGCTTGAGATTGTCTTCTTCGTTGCA(((((...(((((.(({={{{{{{{={{{{{{{{{{{(.((((.....(....)....)))).)))>>>>>>>>>->>>>>>>->>>.)))))...)))))	AGCTCAAGCACAAATTCGATC(37)	+	21	101	-45.9	-45.4455
ptc-miRX112	TGATATGTGGCATTCAATCGA	34	85	scaffold_3	14915843	14915863	GATATCTCATTCATATATCATTTATTCCAGCATTCTTGATTGAATGCCACATATCATTCATTCCTGCTTTTTATATGAAAAGTCGGAATGAATGATATGTGGCATTCAATCGAGAATGCTGGAATAAATGATATCTGAACAATTGATC(((......((((.((((((((((((((((((((((((((((((((((((((((((((((((((.(((((((....))))))).))))))))>>>>>>>>>>>>>>>>>>>>>))))))))))))))))))))).))))......)))	NO	+	21	148	-93.7	-63.3108
ptc-miRX113	TAGCTAGCAAGTTCATGGATC	5	100	scaffold_3	16752735	16752755	AGTTATTCTTAGAGAGTTTTTTAGACTCAAGTTCTGATCCATGTACTGGCTAGTTGGTTTTCCTTTTGAAAACTAGCTAGCAAGTTCATGGATCGGAACTCTCAGTCTGAAAAAACTGATGAGCT((((....((((....(((((((((((..(((((((({{{{{{={{{={{{{{{{{{{((((.....))))))>>>>>>>>->>>->>>>>>>>))))))...))))))))))).))))..))))	TCCATGTACTGGCTAGTTGGT(4) CCATGTACTGGCTAGTTGGTT(1)	+	21	125	-59.5	-47.6
ptc-miRX119	TGGATGATCATGTTGGCAACC	12	60	scaffold_4	6132778	6132798	CATTGTAGGACATTCGTCGGCAACCATTTAGTCATGTTTGCTAACATGACCGTCCAAGTTATCAATTATGTCAGGTTACATTAAGGAAGCTGGCATGAGCATGCCATCAAAGTTGTTGACATGTTTGTCATCTTGGATGATCATGTTGGCAACCATGTTGATGTGGTAGATCATGTGCTGCGTATG((((((((.((((..(((....(((((((((.(({{={{{{{{{{{{{{={{{{{(((....(((.(((((((....(((.....((...((((((....)))))))).....)))))))))).)))....))>>>>>>->>>>>>>>>>>>->))))))).))))).))).)))).))))).)))	TGTTTGCTAACATGACCGTCC(1)	+	21	186	-71.4	-38.3871
ptc-miRX12	TCCATGGAAGATAATGACTCG	42	93.33	scaffold_1	20468231	20468251	GGACCCATGCATGGCGAACAAGTTGAGCTGTAGGGTTATGATGAACATGCTAATTACAAGCTATTGTCTTCCATGGAATAGGCAGTGATGGCATTTGTTTTATTTTCCTGAGGTGGAGAAAAACAAATAGACCATAACACTGTTATTCCATGGAAGATAATGACTCGTGGTTGACACTTGATCTCTCCAGTCCAGTTCAGATTCAAGCTAGCTGCTGTCT((((....((.((((.......((((((((...((....(((.((..((.(((((((.((.((((((((((((((((((((.(((((((((((((((((((..(((((......)))))))))))))).).))))..)))))))))>>>>>>>>>>>>>>>>->>->)))))).)).))…	NO	-	21	220	-82.82	-37.6455
ptc-miRX123	TCTGGTATGAGCATTTGATGA	154	95.06	scaffold_4	11447563	11447583	GGTGCATATATATACATGAATGTGCCTCATGTCTGGTATGAGCATTTGATGATTGATAATTTCAATTTGTTTACATCTTTTTTCTGCAATCCTAATACCGCGTACTTTCAAATGTAAAGAAATTGAAATTATCAATCATCAAATGTTCGTACCATACGTAAGGCACACTCGTATGTATAATTGTATT((((((..((((((.((((.(((((((.(((<-<<<<<<<<<<<<<<<<<<<((((((((((((((((.(((((((........(((............))).........))))))).))))))))))))))))))))))))))))))))))).)))).))))))).)))).))))))..))))))	NO	+	21	187	-85.83	-45.8984
ptc-miRX128	TTGTACACAGAATAGGTGAAAT	109	97.32	scaffold_5	1237722	1237743	CTTGGTTACTGATATTATTTTGAACCGTCATGTCAATTATTGGTTATATATCGACTGAAAATGAAAGCTATTTCACTATTCTGTGCACACAATGCTTGAAACATTAATCATGGTTTTTGAAAGTATTGGAGCATTGTACACAGAATAGGTGAAATAACTTTCATTTTCATTCGATACGCAACTAAAATTGTAAATATAGTTCAGTCTCATCTTGGAAGCCAAG(((((((.(..(.......((((((..(.....(((((.((((((.(.((((((.((((((((((((.(((((((((((((((((...(((((((((.((((.....(((.......)))..)).)).)))))>>>>->>>>>>>>>->>>>>>>).)))))))))))).))))))…	NO	+	22	223	-76.94	-34.5022
ptc-miRX13	TCCATGGAAGATAATGACTCG	42	93.33	scaffold_1	20471501	20471521	GGACTCATGCATGGCGAACAAGTTGAGCTGTAGGGTTATGATGAACATGCTAATTACAAGCTATTGTCTTCCATGGAATAGGCAGTGATGGCATTTGTTTTATTTTCCTGAGGTGGAGAAAAACAAGGAGACCATAACACTGTTATTCCATGGAAGATAATGACTCGTGGTTGACACTTGATCTCTCCAGTCCAGTTCAGATTCAAGCTAGCTGCTGTCT((((....((.((((.......((((((((...((....(((.((..((.(((((((.((.((((((((((((((((((((.((((((((((.((((((((..(((((......)))))))))))))..).))))..)))))))))>>>>>>>>>>>>>>>>->>->)))))).)).))…	NO	-	21	220	-82.02	-37.2818
ptc-miRX14	TCCATGGAAGATAATGACTCG	42	93.33	scaffold_1	20476200	20476220	GGACTCATGCATGGCGAACAAGTTGAGCTGTAGGGTTATGATGAACATGCTAATTACAAGCTATTGTCTTCCATGGAATAGGCAGTGATGGCATTTGTTTTATTTTCCTGAGGTGGAGAAAAACAAGGAGACCATAACACTGTTATTCCATGGAAGATAATGACTCGTGGTTGACACTTGATCTCTCCAGTCCAGTTCAGATTCAAGCTAGCTGCTGTCT((((....((.((((.......((((((((...((....(((.((..((.(((((((.((.((((((((((((((((((((.((((((((((.((((((((..(((((......)))))))))))))..).))))..)))))))))>>>>>>>>>>>>>>>>->>->)))))).)).))…	NO	-	21	220	-82.02	-37.2818
ptc-miRX143	TTTGGGATCATCAGGACAGCC	30	100	scaffold_6	21307806	21307826	ATCTTTTAGCATTTTCCAAGCAAATTGAATTTGTATCTTTGGGATCATCAGGACAGCCCCTGCATCGAGAATTATGCAGAACTCTACTGAAATGAAACGGGGAAAAAAAAATTATTTCAACCTTTGCCACAACTGACGCAGGGGCTGCCCCGATAATTCCAAAGATCCAGTGCAATCTGCTTGTTAAATTGCTACTGGAT((((..((((((((..((((((.((((...(((.(((<<<<<<<<-<<<-<<-<<<<<(((((.((.((......(((((.......((((((((................))))))))...))))).....)))).)))))))))).)).))).))))))))))).)))..)))).))))))..))).)))))..))))	NO	+	21	200	-74.09	-37.045
ptc-miRX146	GTTGAGATGGCCGAGTTGGTC	45	32.61	scaffold_7	4940816	4940836	GAAACAACAACGAGTTGAGATGGCCGAGTTGGTCTAAGGCGCCAGATTAAGGTTCTGGTCCGAAAGGGCGTGGGTTCAAATCCCACTCTCAACAAATCCAATTTTTTTAATATTATACTTGCAAGTCTTAGCCCTTATGTTCAGTTTC(((((((((..(.<<<<<<<<---<<<<<<<<<-...((.((((((.......))))))))....(((.(((((.......))))).))).....................)))).)))))...)))))))).)...))))..)))))	NO	-	21	148	-39.4	-26.6216
ptc-miRX149	TGTTCAGATCAGTAGATAGCA	99	85.34	scaffold_8	207824	207844	GAAAGCCCCTATTTCATGTTCAGATCAGTAGATAGCATGTAGTTTGCTTGTGGTAATGGTACCTTGATCAGACTACTTGCTATCTACGGATCTGCACAGGTTTTT(((((((.........<<<-<<<<<<-<<<<<<<<<<.((((((((.(((.((((....)))).))).)))))))).))}}}}}}}}=}}}}}}=}}}}})))))	CTATCTACGGATCTGCACAGG(6)	-	21	105	-45.6	-43.4286
ptc-miRX15	TCCATGGAAGATAATGACTCG	42	93.33	scaffold_1	20479454	20479474	GGACTCATGCATGGCGAACAAGTTGAGCTGTAGGGTTATGATGAACATGCTAATTACAAGCTATTGTCTTCCATGGAATAGGCAGTGATGGCATTTGTTTTATTTTCCTGAGGTGGAGAAAAACAAGGAGACCATAACACTGTTATTCCATGGAAGATAATGACTCGTGGTTGACACTTGATCTCTCCAGTCCAGTTCAGATTCAAGCTAGCTGCTGTCT((((....((.((((.......((((((((...((....(((.((..((.(((((((.((.((((((((((((((((((((.((((((((((.((((((((..(((((......)))))))))))))..).))))..)))))))))>>>>>>>>>>>>>>>>->>->)))))).)).))…	NO	-	21	220	-82.02	-37.2818
ptc-miRX152	AATGGCCATTGTAAGAGTAGA	32	32	scaffold_8	7964261	7964281	CTTTCATAGTCATAACATCCTGATCAATGGCCATTGTAAGAGTAGAAGGATCCATGAAGCAAAACATTGACTCCTGATATTCCACTCTTACAGAGTCCATTGATTAAGATGTTATAACATTGTTCTGAAAG((((((..((.((((((((.(((((<<<<<-<-<<<<<<<<<<-<<((((((.(((........))).)).)))).....)).)))))))))).).)))))))))).)))))))).)).......))))))	NO	-	21	131	-44.4	-33.8931
ptc-miRX153	TCAGTGGAGATGAAACATGA	8	34.78	scaffold_8	11415604	11415623	TGGAGATGCGGATCAGTGGAGATGAAACATGATTGCTACAGCATTGCTAAGTGTTTAAAGATGAACTGTGTGGTTATTTCCTTGGTGAATGTATTTTTA((((((((((.(<<<<-<<<<<<<<-<<<<--((.((..((((((....))))))...))...))..))))..)))))))))))))...))))))))))	NO	-	20	99	-24.9	-25.1515
ptc-miRX154	TGAACAGTAGACGTGAATTAT	11	78.57	scaffold_8	15318231	15318251	CCCTTTCTTCTTCTTCGTTGTCTACTGAGTGAACAGTAGACGTGAATTATAGTTAACGTCCTACTATTCACACATGGGCGTGAATTATAATTCACGTTCACTGTTCATGCAGTGAATATTGGG(((...............(((.(((((.(<<<<<<<<--<<<<<<<<<<<((((.((((((..............)))))).)))))))))))))))..))))))))).))))).)))..)))	NO	+	21	123	-50.24	-40.8455
ptc-miRX156	TTGTCTTCCATGGAATAGGCA	12	48	scaffold_8	16262404	16262424	CTGAGAATTGGACTCATGCATGGCGAACAAGTTGAGCTGTAGGGTTATGATGAACATGCTAATTACAAGCCATTGTCTTCCATGGAATAGGCAGTGATGGCATTTGTTTTATTTTCCTGAGTTGGAGAAAAACAAATAGACCATAACACTGTTATTCCTTGGAAGATAATGACTCGTGGTTGACACTTGATCTCTCCAGTCCAGTTCAGATTCAAGCTAGCTGCTGTCTGTAAATTCTTTG(.(((((((((((....((.((((.......((((((((...((....(((.((..((.(((((((.((.((<<<<<<<<<<-<<<<<<<-<<(((((((((((((((((..(((((......)))))))))))))).).))))..))))))))))))…	NO	+	21	241	-85.82	-35.61
ptc-miRX160	ATCAATGAGAATACTACTGCA	7	53.85	scaffold_9	10675174	10675194	TTAGTTAAGCGTGGGCTTTTCTCTGCAAAATTTGCAACTCAAAGTTTCCTCCAGTCGTTGGATTATCAATGAGAATACTACTGCAAAAAATAGTCCAAGAGTTTATAATACCAACTATGAAAAATCAAAACAGCAATCTTTTGCAGGAGTATTCTCATTGAGAATCCAACAATTAGAGAAAGCTTTGACACAAGTTTTGCAAGAAAAAAGGAAAGTCTCATGTCTCAACTAA((((((.(((((((((((((((((((((((((((....(((((((((.(((.(((.((((((((-<<<<<<<<<<<<<<-<<<<<(((.((.((....((.((((((........))))))...))......)).))=}}}}}}}}=}}}}}}}}}}}))).)))))…	CTTTTGCAGGAGTATTCTCAT(1)	+	21	232	-88.7	-38.2328
ptc-miRX161	TTGCTGAAACGATTGAACTAT	5	100	scaffold_9	10835061	10835081	CTCGCAACCTCTGTCTCGGAACAATAGTTCAATCTTTTCAGCAACCTTAAATAGTGGGCTATTTAAGGTTGCTGAAACGATTGAACTATTGTGACTTGTGAG(((((((.....(((.....((((((((((((((.(((((((((((((((((((....))))))))))>>>>>>>>>->>>>>>>>>>>)))))))))))))	NO	+	21	102	-55.1	-54.0196
ptc-miRX17	GTGGGAATGAACATTATGAGA	41	70.69	scaffold_1	22901417	22901437	TGCACGCTCTCGTAATGCTTCATTCTCACAACGGCAAAGTGTTATTGCATCATCCTAATGATTATCATCAGCCGTCGTGGGAATGAACATTATGAGACTGTGTA((((((.((((((((((.(((((((((((.(((((...((((....))))........((((....))))))))).>>>>>>>>>>>>>>>>>>>>>.))))))	NO	-	21	104	-46.5	-44.7115
ptc-miRX22	TGATGATTAATTGACTGCAAA	5	83.33	scaffold_1	34025520	34025540	CCAATCTTAGCTTCTTGTTGTTTAGCTTGATGATTAATTGACTGCAAAAGCAACTCTCTTCTTTTTTTAGGAGAGGAGTTGCCTTTGCAGTCAAGTAATCATCAAGCTAAATACCATAACTGAGGACTGAGGTAGAAGG((.(((((((((((.((.(((((((((<<<<<<<<<-<<<<<<<<<<<.(((((((((((((......)))))).))))))).))}}}}}}}}}=}}}}}}}}}}}))))))).)).....)))).)))))))....))	TGCAGTCAAGTAATCATCAAG(1)	+	21	139	-72.2	-51.9424
ptc-miRX3	TGTGATAATGAAGGCTATGGT	9	69.23	scaffold_1	5942036	5942056	GTATAATGCCAACCATAGCCTCCATTATCACACTATTTTGTTTGGTATTTTACCAAACAAAATGGTGTGATAATGAAGGCTATGGTTGGCATTATTGC(((((((((((((((((((((.(((((((((((((((((((((((((...)))))))))))))))>>>>>>>>>>->>>>>>>>>>)))))))).)))	NO	+	21	98	-69	-70.4082
ptc-miRX40	AAGTTGACGGAAGGACTACAT	120	93.02	scaffold_11	18360534	18360554	CAGCAATGTAGTCCTTCCGTCAACTTTGAGATACGTGTTACACTTCTGCATGTCACGTGACCACGCTGTCAAAGTTGACGGAAGGACTACATTGCTG(((((((((((((((((((((((((((((.(..((((((((((........))...)))).)))).).)))>>>>>>>>>>>>>>>>>>>>>)))))	NO	-	21	97	-58.2	-60
ptc-miRX41	CTGAACGGCTTGAAGGGCACG	11	44	scaffold_12	758356	758376	GTTTGAACTTCTTGCATGTCAAGCCGTTCAAGCCTAGTCTGAAAGGTCAGGAGGGCGTGCTATTCGGTCTAGGCCTGAACGGCTTGAAGGGCACGTTGTTCAGGC((((((((..(={{{==={{{{{{{{{{{{={(((((.(((((.((.((.(....).)))).))))).))))))->>>>>>>>>>>>--->>>->..))))))))	TTGCATGTCAAGCCGTTCAAG(1)	-	21	105	-56.1	-53.4286
ptc-miRX47	TTCATTCCTCTTCCTAAAATGG	90	91.84	scaffold_12	7706256	7706277	TCTCTTTGCCACGTTGTTCATTCCTCTTCCTAAAATGGCTTCTCCTTCAATTTTAAAAAAAATAAAAATTAAAGGAGAATCCAATATGAAATGAGAAGCTATTTTAGGAAGGGAATGAATACGGTGTCGGTGTTATAAGAGA((((((.((((((..(<<<<<<<<-<<<<<<<<<<<<<((((((.((((.(((((.......)))))......((.....))....))))..))))))))}}}}}}}}}}}}}}}}}}==})..))).))).....))))))	ATTTTAGGAAGGGAATGAATA(13) TTTTAGGAAGGGAATGAATA(9)	-	22	142	-55.2	-38.8732
ptc-miRX50	TTGCTGGGTCCTGATGATGGA	48	77.42	scaffold_12	13985294	13985314	CGCTTTCTTCCTTTAAAAAATATCAGTTCCATCATGAGGGCTCAGTAAACAACATAATTAACATCCTACCAAGGAGCAAGAAGGCTATTAGGAGGTCAATTCCTTTACCTAGCGGAAGTGTTGTTTTGACATGAGTGGCATTTATCTCGATAGTCTTGGATAGAATTATGCTGCTTGCTGGGTCCTGATGATGGAACTAGCATTTTTTAAGGGAAGAAAACG((.((((((((((((((((((.(.(((((((((((.((((((((((((.((.(((((((......(((((((((..(.(((..((((...(((((......)))))...))))..((((((..(((......)))..)))))).))).)....)))))).)))))))))).)).>>>…	NO	-	21	222	-91	-40.991
ptc-miRX53	TGTGAATGATGCGGGAGATAA	23	40.35	scaffold_13	8843392	8843412	TAATGGTGGGAGAGAGCTTCCTTCAGCCCACTCATGGATAGGAGAAAGGGGTTGAATTAGCTGCCGACTCATTCATTCAAGCACCAGTAGAAAAAGGGGAATGGATATTCTTTTGCTACTGTGATTGTGTGAATGATGCGGGAGATAATTTTACATCCCCTCTTTTTCTGTGCTTGGACTGAAGGGAGCTCCTTCCTTCTATTG((((((.(((((.(((((((((((((.(((..((((((.((((((..((((..((((({={{={{{=={{{{{{{{={{(.(((.(((((....((((((((....)))))))).)))))))).)))->>>>>>>>-->>>->>->>>))).....))))))))))))))))..))).)))))))))))))))))…	AGCTGCCGACTCATTCATTCA(9)	+	21	204	-92.7	-45.4412
ptc-miRX63	TGAGGCCTTTGGGGGAGAGTGG	905	97.84	scaffold_14	6873257	6873278	CTCTATGCATGGTCTCAGGGTGGCAATCATTGTTCACTCTCCCTCAAGGCTTCCAACGCAATAACCAGCTACGTACATGTAACTGTGTTACGGCTGCAGGCTTGAGGCCTTTGGGGGAGAGTGGTCAAAAGTTGTCATGATTTTGGCAGACGAG(((..(((..((((.....((((((((..(((..(((((((((((((((((((.((.((......((((..(((((((......))).))))))))...)))>>>>>>>->>>>>>>>>>>>>-.)))..))))))))))))...)))...)))	NO	+	22	154	-62.4	-40.5195
ptc-miRX64	TAGGCACAGAATTAACAAGGC	57	76	scaffold_14	7160402	7160422	TTCTAGAGGTAATTAACATCTAACATCTGCAGACTACTTGCCTTGTTACTGCCGTGCCTATTTTGAATATATATATTCAAAATAGGCACAGAATTAACAAGGCAAGTATTCAGTAGATGTTAGATAGGATGAGCTAAGGCTGGAG((((((.(((.(((...(((((((((((((.((.(((({{{{{{{{{{==={={{{{{{((((((((((....)))))))))>>>>>>>->--->>>>>>>>>))))).)).)))))))))))))..)))..)))....))))))	TGCCTTGTTACTGCCGTGCCT(1)	+	21	145	-71.4	-49.2414
ptc-miRX74	TTCATTCCTCTTCCTAAAATGG	90	87.38	scaffold_15	8556726	8556747	GGCTGCTTCTTTTTCTCTCTGGGCACGTTGTTCATTCCTCTTCCTAAAATGGCTTCTTCTCCTTTAGTTGTTGCAATTATAGGAGAGGAGAATCCATTTTAGGAAGGGAATGAATACTGTGTCGGTTTTACGAGGGAGACAATC(..(((((((((......((((.((((.((<<<<<<<<-<<<<<<<<<<<<<.((((((((((.((((((...)))))).))))))))))...))}}}}}}}}}}}}}}}}}}}}}.))))))))......))))))).))..)	ATTTTAGGAAGGGAATGAATA(13)	+	22	144	-66.7	-46.3194
ptc-miRX76	TGGACTCCTTTGGGGAGATGG	198	92.09	scaffold_15	12480617	12480637	ATGCTACTACATGGATGGAGAAGCTTCCGATCTCCCTCAAAGGCTTCCTCTATAATTGCCTTACATGATGGCATTAGTGGACTCCTTTGGGGAGATGGAGAGCTTACTCCCCATAACTCAATGGCAT((((((....((((..(((((((((..(.{{{{{{{={{{{{{=={{{={((....((((.........)))).)))->>>-->>>>>>>>>>>>>->..))))).)))))))).......))))))	ATCTCCCTCAAAGGCTTCCTC(10)	+	21	127	-56.6	-44.5669
ptc-miRX79	TAACATCTTGATCAATGGCCA	302	40.48	scaffold_17	1876684	1876704	TGGCTTTCATAGTTATAACATCTTGATCAATGGCCATTGTAAGAGTAGAAGGATCCATGAAGCAATAATTCTCTTTGCTAAAATGTGTGATAAAACATTGACTCCTGGTATTTCACTCTTACAGTGCCCATTGATTAAGATGGTATAATGTTGTTATCA(((.(..((..((((<<-<<<<<<<<<<<<<<<-<<((((((((((.((((...(((.(((((((.........)))))..(((((........)))))...)).)))..)))))))))))))))).))))))))))))))).))))))..))..))))	NO	+	21	159	-57.2	-35.9748
ptc-miRX82	TGCAAAGGTAACTGAGACAAT	6	66.67	scaffold_17	7053566	7053586	TGATTCTTCTGGTATTGTCTCAATTGCCTTTGCAATTGATCAACAATCAAATGTAGATTGTTGTTCTAGATCAATTGCAAAGGTAACTGAGACAATCAAATGTAGAACTAAGGGAACA((.((((..(((((((((((((.(((((((((((((((((((((((((.......)))))))......)))))))>>>>>>>>>>>->>>>>>>>>..........))))..))))))	NO	-	21	118	-49.3	-41.7797
ptc-miRX84	TCTGTCGCTGGAAAGATGGTAC	66	66	scaffold_17	10902839	10902860	GGTTTGGGGAGGGGAGTTCTGTCGCTGGAAAGATGGTACCTAGGGCTGCATATTAATGTGTATAGCAAGCAATAGGCACCATCTTCCCGCGACGGAACTCCCCTCTAACCTCTACC(((..((((((((((((<<<<<<<<-<<<<-<<<<<<-<(((..(((((((((......)))).)).)))..)))).)))))))))).)))))))))))))))))...)))..)))	NO	+	22	116	-70.5	-60.7759
ptc-miRX88	CTTGTAACCTGAGTAGAGGCA	9	90	scaffold_18	5957754	5957774	TAGCTGGGTAACGTGGACTTGTAACCTGAGTAGAGGCAATAAAGTGATATAACATTGGCTCGCTCAGCTTAGAAGGTCGGGTCCAGTTA(((((((...((.((..<<<-<<<-<<<<<<-<<<-<<((...((......)))))).))))))))).))).)))..)).)))))))))	NO	+	21	89	-32.3	-36.2921
ptc-miRXX156	TTGACAGAAGATGGAGAGCAC	40	100	scaffold_1	34445912	34445932	GTTGACAGAAGATGGAGAGCACAGCTACATGTAATCGAGAATTAGTCCTGTAGAAGTGCAGTTTGTGCTTTGTGTTTTCTTTTCTTCTTTAAAC(<<---<<<<<<-<<<<<<<<<(.(((((.(....(........).).))))).((..(.....)..)).))))))))))..))))))...)))	NO	-	21	94	-24.9	-26.4894
ptc-miRXX164	TGGAGAAGCAGGGCACGTGCA	2901	99.28	scaffold_13	945104	945124	GCGGTTTACAATTGGGTGTGTAGCTCTTGCTGGAGAAGCAGGGCACGTGCAAGCTCTCTCCTCAGGCTTTCCTTGCACGTGCTCCCCTTCTCCAACATGGGTTTCTCACCTTTCCTC(.((.........(((((.(.(((((.((.<<<<<<<<--<<<<<<<<<<<((......((...)).....)))))))))))))..)))))))).)).))))).).)))))..)).)	NO	-	21	117	-50.7	-43.3333
ptc-miRXX166	TCTCGGACCAGGCTTCATTCC	1490	86.13	scaffold_8	10886863	10886883	AGTTGAGGGGAATGCTGTCTGGTTCGAGACCATTCACCTGAAGCGCACGCATTCATCTTTTGAGTGATCTCGGACCAGGCTTCATTCCCCCCAACT(((((.((((((((..(((((((((((((.((((((..((((((....)).)))).....)))))).>>>>>>>>>>>>>-->>>>>>)).)))))	NO	-	21	96	-54.3	-56.5625
ptc-miRXX166a	AAGCCAAGGGTGACTTGCCTGA	5	100	scaffold_9	12179628	12179649	TGAGAGAAGAGAGGTCTAATATGAGGATCAGAGCCTTGTGTGGAAGCCAAGGGTGACTTGCCTGAGCATTTCAGGAAGGTTTCTATATGAAAGCTTTTTGTTAGTTTTGCAGGAAGTCAACCTCGGCTTTCCTGTAGTCTCTTCTTTCTCATGCTATGCCTTTCTCTTCTTCCA((..(((((((((((.((.((((((((..((((.((...(.((<<<<<-<<<-<<<<<<-<<<<-......(((((((.((((.....)))).))))))).........)))))))))).))).))))))))...)).))))...)))))))).)).)))..))))))))..))	NO	+	22	174	-70.89	-40.7414
ptc-miRXX169*	GGCAGGTTGTTCTTGGCTAC	146	78.49	scaffold_13	4145305	4145324	TCACTGTAACAGCCTTGCATGGAGGATCATAAAGATTGATGCAGCCAAGGATGACTTGCCGACGACTCGTTTTTGCTTCCATCAATATACGCATAATTAAGAAGAGATGAATCCGTTGGCAGGTTGTTCTTGGCTACATTTTTCTTTCTGCTCCTCATGCCAGGCTTATGGTGA((((((((..(((((.(((((.((((.((.(((((..((((.{{{{{{{{{=={{{{{{{{{((..((((((((.(((....................))).))))))))...))))>>>>>>>-->>>>>>>>>->)))..))))).)).))))))))).)))))))))))))	AGCCAAGGATGACTTGCCGA(3)	+	20	174	-80.85	-46.4655
ptc-miRXX169a	AGCCAAGGACGACTTGCCCA	438	81.26	scaffold_5	6551960	6551979	GAGATGATGGCCTTACATGAAGATAAGAGTCTTGTTTGTAGCCAAGGACGACTTGCCCACAATATGTATCGTGAGCGTTTCCAATTTGCAACCTCATACTTGGTTGTTTTGGGCAGTCTCCTTGGCTATGCAGATGGACTCTTCTCAGTCATGATAGGCATCTTCTC((((.((((.(((..(((((.((.((((((((.((((((<<<<<<<<<-<<<<-<<<<<..........(....)............((((((........)))))).=}}}}}}}}}}}}}}}}}}=.)))))))))))))).))..)))))..))))))).))))	TTGGGCAGTCTCCTTGGCTA(1)	+	20	167	-71.82	-43.006
ptc-miRXX169b	AGCCAAGGACGACTTGCCCA	438	81.26	scaffold_7	6019711	6019730	GAGATGATGGTCTTGCATGAAGATAAGAGTGTTGTTCGGTAGCCAAGGACGACTTGCCCACACTATGAGACAAGTGGTTAGAATTAGCAACTTCTTAATTGGTTATGGGAAGTCTCCTTGGCTATGCTGACAGACTCTTCTCGATCATGCCAGGCATCTTCTT((((.((((.(((.((((((.((.((((((.((((.((((<<<<<<<<<-<<<<<-<<<<.(((((((((..(((.((((....)))).))))))))..))))..))))))))))))))))))..)))))))))))))).))..)))))).))))))).))))	NO	-	20	163	-69	-42.3313
ptc-miRXX169d	CAGCCAAGGATGACTTGCCGG	49	94.23	scaffold_18	14350505	14350525	GGTGTAGGAGTTTTGCATGAAGAGGTAGAGAGTAGAATGCAGCCAAGGATGACTTGCCGGCATTTCCTCCCAGCTAGCTAGCAAGCCTTCTATTTGGCATGCCTGGCCGGCAGGATGTCCTTGGCTATATTTTGTTCTCTTCTTCTCATGTGAGACTCCAGGCC(((.(.(((((((..(((((.((((.(((((((((((((-<<<<<<<<<<<-<<<<<<<<(..........((....)).(((.(((........))).)))...))))))))).))))))))))).))))))))))))).)))))))))..)))))))).)))	NO	-	21	164	-87.8	-53.5366
ptc-miRXX171	TGATTGAGCCGTGCCAATATC	12	92.31	scaffold_5	7776956	7776976	GGGATTGTTTACCGTGTTGAAATCATGTGGAAGAGTGACTATGATATTGGCCTGGTTCACTCAGATCACGACTTCAGAGCAAAGTGTCTTTCTTCTTCTTCTTTTTCTTCTTCTTCTTGTTTTATGTTCGTTTGATTTGATTGAGCCGTGCCAATATCTCAGTACTCTTTCATGTCTCTCCAAGTCGATCTCCAGAAACACTATTCC((((((((((.....(((((....(((((((((((((.((..(((((((((.(((((((.(((((((((((.(..(((((((..................................)))))))..).))))..))))>>>->>>>>>>->>>>>>>>>..))))))))))))))).........)))))...…	NO	+	21	207	-60.5	-29.2271
ptc-miRXX171g*	TGATTGAGCCGTGCCAATATC	12	85.71	scaffold_12	11044679	11044699	GAGAAAGTGGGGGATGTTGGGATGGCTCAATCATGTCAAATCTCCCAAATTATGATGTTGGGTCTTTTAATCTGATTGAGCCGTGCCAATATCACACTTCTT(((((.(((...{{{{{{{{={{{{{{{{{{{{.((.(((...(((((.........)))))...))).)).>>>>>>>>>>>>->>>>>>>>.))))))))	GATGTTGGGATGGCTCAATCA(3) TGTTGGGATGGCTCAATCATG(7) GTTGGGATGGCTCAATCATGT(2)	+	21	102	-46.1	-45.1961
ptc-miRXX171h*	TGTTGGGATGGCTCAATCATA	13	76.47	scaffold_15	11748073	11748093	CGTGTGGTAAGTTCGGAGAAAGTGGGGGATGTTGGGATGGCTCAATCATATCAAATCTCCCAAACTATGATGTTGGGTCGTTTAATCTGATTGAGCCGTGCCAATATCACACTAACTATATATG((((((...((((.......((((...((<<<<<<-<<<<<<<<<<<<-<(.((((..(((((.(......))))))..)))).)).}}}}}}}}}}}}=}}}}}}}}.)))))))).))))))	TGATTGAGCCGTGCCAATATC(12) TGATTGAGCCGTGCCAATAT(1)	+	21	124	-48.91	-39.4435
ptc-miRXX172	GGAATCTTGATGATGCTGCAT	39	60.94	scaffold_9	4502878	4502898	AAGATTATCAGTCTATATTGGCCGATGCGGCAGCATCAAGATTCACAAACTTTAAGGCTTGAGTTGGGGTGGTACACGGTCCCCTCCTTTACTCGAAAGGTTCCTTAATTTCTGATGGGAATCTTGATGATGCTGCATCGGCAAATATATGACTATTCTTCTT((((..(..((((((((((.(((((({{{{{{={{{{{{{{{{{={{....((((((.((((((.((((.((........)).))))...))))))......)))))).......))->>>>>>>>>>>->>>>>>>>)))).)))))).))))..)..))))	GCGGCAGCATCAAGATTCACA(9)	+	21	163	-67.9	-41.6564
ptc-miRXX2111	TAATCTGCATCCTGAGGTTTG	12	70.59	scaffold_16	8456156	8456176	CTTGATATTGGGTCAGGACTTGGTAATCTGCATCCTGAGGTTTGGATCATCATGTAGTTTGATCTAGTCCTTGGGTTGCAGATTACCTCTTCCTCACTGACAATGCAGAG(((..((((((((.((((...((<<<<<<<<<-<<--<<<-<<<(((((..........)))))))}=}}}==}}=}}}}}}}}}}}...)))).)))..)))))..)))	GTCCTTGGGTTGCAGATTACC(11)	+	21	110	-49.4	-44.9091
ptc-miRXX2111a	TTACCAATACCTCTCATGCCAA	11	100	scaffold_5	11901582	11901603	GAGAAGAGCCGGAGGGGGAGACTGAGACCTACTGGAAGTTGTGGGCATGAGGTGTTTGGCAAGAAAATGGATCTTTTCCTTATGATGATTTCTTACCAATACCTCTCATGCCAATGATTTCCAGCAGTTCCTCCCTTTCCCTTCTTTCTC((((((((..((((((((((((((.......((((((((..(.(((((((((.((((((.((((((..(((.....))).........))))>>->>>>->>->>>>>>>>>->..))))))))))))..)))))))))).))).)))))	NO	-	22	150	-62.71	-41.8067
ptc-miRXX2111b	TAATCTGCATCCTGAGGTTTG	12	70.59	scaffold_6	6828159	6828179	ATATTGGGTCAGGATTGGGTAATCTGCATCCTGAGGTTTGGATCACCACATGTTTTGATCTAGTCCTTGGGTTGCAGATTACCTCTTCCTCACTGACAATGT(((((((((.((((..(((<<<<<<<<<-<<--<<<-<<<(((((..........)))))))}=}}}==}}=}}}}}}}}}}})..)))).)))..))))))	GTCCTTGGGTTGCAGATTACC(11)	-	21	102	-50.2	-49.2157
ptc-miRXX393*	ATCATGCTATCCCTTTGGATT	80	87.91	scaffold_10	17888043	17888063	GCAACTAGAGGAGGCATCCAAAGGGATCGCATTGATCCCGAGTGTCCCTGGCCATAATTTTGGATCATGCTATCCCTTTGGATTCCTCCTTTGGTGGC((.(((((((((((.({{{{{{{{{{{={{{{={{{{(.((((.............)))).))>>>>>>>->>>>>>>>>>>>-))))))))))).))	TCCAAAGGGATCGCATTGATC(41)	-	21	98	-54.32	-55.4286
ptc-miRXX393a*	ATCATGCTATCCCTTTGGATT	80	87.91	scaffold_8	3747134	3747154	ATGTTTTTACTGCAACTAGAGGAGGCATCCAAAGGGATCGCATTGATCCCAAGTGTCTGTCCCCCATAATTTTGGATCATGCTATCCCTTTGGATTCCTCCTTTGGTGGCTTCTATAACAT(((((......((.(((((((((((.({{{{{{{{{{{={{{{={{{{(.((((...((.....))..)))).))>>>>>>>->>>>>>>>>>>>-))))))))))).))......)))))	TCCAAAGGGATCGCATTGATC(41)	+	21	121	-58	-47.9339
ptc-miRXX395	CTGAAGTGTTTGGGGGAACTC	22	91.67	scaffold_761	162	182	ATCAAGTGTCCCCTAGAGTTCCTCTGAGCACTTCATTGGGGATCTTCCATCGACCTGAGAGAGTATTATCATTCCTACTGAAGTGTTTGGGGGAACTCCTGGTGTCATTTGAT((((((((.(.((..(((((((((..(((((((((.(((((((((..((......))..))).........))))))->>>>>>>>>-->>>>>>>>>..)).).))))))))	NO	+	21	113	-52.8	-46.7257
ptc-miRXX395a	CTGAAGTGTTTGGGGGAACTC	22	91.67	scaffold_761	7013	7033	GAAACGCAAAGAACGTTAGCTGTCCCCCGGAGTTTCCCTGACCACTTCACTGGGGCTATAATTCTACTCTTCGTGTTCAAGGGTAGTGGCAACCCTTCCTCACTGAAGTGTTTGGGGGAACTCTGGGTGGCATTTGACACTGTTTAGCAGTC((...(((((.(..(((((.((((.(((((((((((((..(.(((((((.(((((........((((((((.......)))))))).(....)....)))))->>>>>>>->-->>>>>>>>>)))).)))).)))))..).))).))..))	NO	-	21	152	-64.4	-42.3684
ptc-miRXX395b	CTGAAGTGTTTGGGGGAACTC	22	91.67	scaffold_792	1141	1161	GAAACGCAAAGAACGTTAGCTGTCCCCCGGAGTTTCCCTGACCACTTCACTGGGGCTATAATTCTACTCTTCGTGTTTAAGGGTAGAGGCAACCCTTCCTCACTGAAGTGTTTGGGGGAACTCTGGGAGGCATTTGACACTGTTTAGCATTC(((..(((((.(..(((((.((((.(((((((((((((..(.(((((((.(((((......((((((((((.......)))))))))).........)))))->>>>>>>->-->>>>>>>>>)))).)))).)))))..).))).)).)))	NO	+	21	152	-66.76	-43.9211
ptc-miRXX396	TTCCACAGCTTTCTTGAACTT	520	40.12	scaffold_6	4643011	4643031	GAAAGTCCTGGTCATGCTTTTCCACAGCTTTCTTGAACTTCCTTGCCATGCTTAACTTGTGTGTGTGTATAGATCACTATATATCTGTATAGTTATACACATTTAGCTAGCTAGCACCATTGAAGCTCAAGAAAGCCGTGGGAGAACATGGCAACTCAGGATTTTT((((((((((((((((.((<<<<<<-<<<<<<<<<<-<<<(..((...((((...((.((..(((((((((....(((((((....))))))))))))))))...)).))..)))).))..)}}}=}}}}}}}}}}=}}}}}})).))))))....))))))))))	AAGCTCAAGAAAGCCGTGGGA(1) GCTCAAGAAAGCCGTGGGAGA(2) CTCAAGAAAGCCGTGGGAGA(61)	-	21	166	-70.5	-42.4699
ptc-miRXX396*	CTCAAGAAAGCTGTGGGAGA	1881	85.89	scaffold_18	13223920	13223939	CTCGCAAGTCCTGGTCATGCTTTTCCACAGCTTTCTTGAACTTCTTTGCCTTGCTTAATCTGTGTATATATAGATCACTACATGTACAGCTCCTATATATATAAATATATGTATGTATAGCGCCATGGAAGCTCAAGAAAGCTGTGGGAGAACATGGCAATTCAGGATTTTTTTGGG((((.((((((((((((((.(({{{{{{{{{{{{{{{{{={{(((..((.............(((((((.(((....))).)))))))....(((((((((((......))))))))))).))...)))))->>>>>>>>>>>>>>>>>>>.))))))....))))))))...))))	TTCCACAGCTTTCTTGAACT(70) TCCACAGCTTTCTTGAACTT(1)	-	20	177	-71.1	-40.1695
ptc-miRXX403c*	TTTGTGCGTGGATCTGAGGCC	358	97.02	scaffold_8	6485435	6485455	TCTTCTCCCCTAACAAGAGGAGTCCTATCTCTGGTTTGTGCGTGGATCTGAGGCCATCACAACCGTCCACTACACGACCACCCAATGGCTTTAGATTCACGCACAAACTCGCGATCTGTCTCCTCTACTACACCGAATAGA(((..((........(((((((.(..(((.(.((<<<<<<<<<<<<<<<<<<<<<((.......(((........)))......))))))))))))))))))))))))).).)))..).)))))))........))..)))	NO	+	21	141	-58.41	-41.4255
ptc-miRXX475b*	TAACATCTTGATCAATGGCCA	302	40.48	scaffold_8	14223580	14223600	GTCATAACATCTTGATCAATGGCCATTGTAAGAGTAGAAGGATCCATGAAGCAATAACTCTCTTTGCTGAAATGTGCGACCAAATAGACTCTTGATATTTCATTCTTACAGTGCCCATTGATTAAGATGTTATAAC((.(<<<<<<<<<<<<<<<<<<-<<((((((((((.((((.((((((..(((((.........)))))...)))...................))).))))))))))))}}}}=}}}}}}}}}}}}}}}}))).))	AGTGCCCATTGATTAAGATGT(1) GTGCCCATTGATTAAGATGTT(2)	-	21	136	-49.9	-36.6912
ptc-miRXX827*	AGATTTTCGTTTCTGATCAT	5	25	scaffold_7	510484	510503	GAGATGATGAAATCAGAAAATCTTAGGACACCTTCTGACACAGTACGATGTTGTGCTGTGTATGAGAAAGATTTTCGTTTCTGATCATTTT(((((((((((((..(((((((((.........(((.((((((((((....))))))))))...))))>>>>>>>>>>>>>-->>>>>)))	NO	-	20	91	-28.2	-30.989
Alignment of all MTX smallRNA reads and miRNA hairpins.
Schematic of folding structure as produce by RNAfold is shown below hairpin. Location of miRNA in hairpin is indicatd by '<' or '>' symbol. Brackets '{' or '}' indicate the position of matched nucleotides in miRNA*. '-' and '=' are mismatches in miRNA and miRNA*, respectively. Dots '.' are mismatches in non-miRNA portion of hairpin.
ptc-miR1444a
ttcgagtttatcacttgaatgttgaccgaatatggatgaaaagttgttttctgtttcctttccTCCACATTCGGTCAATGTTCCagtgatgagcatgaa 200
((((.((((((((((={{{{{{{{{{{{{{{={{{{.((((.(..(........)..))))).>>>>->>>>>>>>>>>>>>>-)))))))))).))))
tgaatgttgaccgaatatggat 1
tgaatgttgaccgaatatgga 11
gaatgttgaccgaatatggat 2
gaatgttgaccgaatatggatgaa 1
gaatgttgaccgaatatgga 1
aatgttgaccgaatatggatg 2
tgttgaccgaatatggatgaa 1
ttgaccgaatatggatgaaaa 4
gaccgaatatggatgaaaa 2
gaccgaatatggatgaaaagt 1
accgaatatggatgaaaagt 1
accgaatatggatgaaaa 1
ttcctttcctccacattcggt 1
ctccacattcggtcaatgttc 3
tccacattcggtcaatgttc 5
tccacattcggtcaatgttcca 9
TCCACATTCGGTCAATGTTCC 152 miRNA
ccacattcggtcaatgttcca 1
attcggtcaatgttccagtga 1
ptc-miR1444b
tcgaatatttccttgtttatccctcgaatattgatcgaatatgtatgaaatatgatggttatatgtttcattCACATTCGGTCAACGTTCGAGtgataaacagaaataattgg 149
((((.((((((..(((((({{={{{{{{=={{{{{{{{{{.((.((((((((((.......)))))))))).>>->>>>>>>>>>-->>>>>>.)))))))))))))).))))
tccctcgaatattgatcgaat 1
cgaatattgatcgaatatgta 14
ttgatcgaatatgtatgaaat 5
gaatatgtatgaaatatgatgg 1
ttcattcacattcggtcaacg 1
attcacattcggtcaacgttcgag 5
tcacattcggtcaacgttcga 1
CACATTCGGTCAACGTTCGAG 109 miRNA
acattcggtcaacgttcgag 1
acattcggtcaacgttcgagt 2
acattcggtcaacgttcgagtg 1
cattcggtcaacgttcgagt 2
cattcggtcaacgttcgagtg 1
cattcggtcaacgttcgag 2
attcggtcaacgttcgagtga 2
ttcggtcaacgttcgagtg 1
ptc-miR1446a
ggatgttgaagatccaacttcTTCTGAACTCTCTCCCTCAACcgctactctagagcttggcaatccttgtcgattgtttctgtgtagcggttgaggtgaggggttcagaacatgttggcttcgatgattc 850
(((((((((((..(((((...<<<<<<<<<<-<<<<<<<<<<((((((.(..((((((((((.....))))))..))))..).)))))}}}}}}}}=}}}}}}}}}}}})...)))))))))))).))))
ttctgaactctctccctcaa 9
TTCTGAACTCTCTCCCTCAAC 719 miRNA
ttctgaactctctccctc 2
tgaactctctccctcaaccgct 67
tgaactctctccctcaaccgc 16
tgaactctctccctcaac 2
tgaactctctccctcaaccg 1
tgaactctctccctcaaccgcta 4
gctactctagagcttggca 1
cgattgtttctgtgtagcggtt 1
cgattgtttctgtgtagcggt 1
gattgtttctgtgtagcggt 1
ttgtttctgtgtagcggtt 1
ttgtttctgtgtagcggt 1
cggttgaggtgaggggttcaga 21
ggttgaggtgaggggttcaga 1
tgaggtgaggggttcagaac 2
ptc-miR1446b
ttgaagatccaatttcTTCTGAACTCTCTCCCTCAACcgccactctagaggttggcaccttgtcaattgtttctgtgtagcggtcgaggtgaggggttcagaacatgttggctttga 939
(..(((..(((((...<<<<<<<<<<-<<<<<<<-<<(((.((.(.((((((((((.....))))))...))))).)).))))).)))).)))))))))))))...))))))))..)
ttctgaactctctccctcaa 9
TTCTGAACTCTCTCCCTCAAC 719 miRNA
ttctgaactctctccctc 2
tgaactctctccctcaaccgcca 1
tgaactctctccctcaaccgcc 33
tgaactctctccctcaaccgc 16
tgaactctctccctcaac 2
tgaactctctccctcaaccg 1
cactctagaggttggcaccttg 1
ttgtcaattgtttctgtgtagcggt 1
tcaattgtttctgtgtagcggt 1
caattgtttctgtgtagcgg 4
caattgtttctgtgtagcggtc 1
caattgtttctgtgtagcg 1
caattgtttctgtgtagcggt 135
aattgtttctgtgtagcggt 4
ttgtttctgtgtagcggt 1
cggtcgaggtgaggggttcaga 7
ptc-miR1446c
gaatgttggaaatccaactttTTCTGAACTCTCTCCCTCAACtgctattctagagcttcctgagctaacccttgtgtttctgtgtagcagtcaaggtgggaggctcagaaaatgttggtttcttagcttttc 750
(((.((((((((.(((((.((<<<<<<-<-<<<<<<<<--<<((((((.(..((((....((((......)))).))))..).))))))))..))).)))))).)))))))).))))))))).))))..)))
ttctgaactctctccctcaa 9
ttctgaactctctccctcaact 16
TTCTGAACTCTCTCCCTCAAC 719 miRNA
ttctgaactctctccctc 2
tctgaactctctccctcaact 1
tgaactctctccctcaactgct 1
tgaactctctccctcaac 2
ptc-miR1446e
gtatcagaatgttggtgatccaactttTTCTGAACTCTCTCCCTCAACtgctattctagagcttgttaatccttgtcaagtgtttccctgtagcagtcgaggcgagggggtttcggaaaatgttggctcctcagctcttaattac 750
(((.......(((((.((.(((((.((<<<<<<<<<<<<<<<<<<-<<((((((......(((((...........)))))........)))))))).)))).))))))).))))))))).))))).)).))))).......)))
ttctgaactctctccctcaa 9
ttctgaactctctccctcaact 16
TTCTGAACTCTCTCCCTCAAC 719 miRNA
ttctgaactctctccctc 2
tctgaactctctccctcaact 1
tgaactctctccctcaactgct 1
tgaactctctccctcaac 2
ptc-miR1447
gtgaacgaaggaggccctaatcagggcactgcaattctaaatgtctgttggcaagtggcgatgccagacgtttgaaatttacttatcatttattagtCAGAATTGCAGTGCCTTGATTtgggctttgtctgttcc 805
(.(((((.(.(((((((.(({{{{{{{{{{{{{{{{{{{{{(((((...((((........)))))))))))).......(((...........)))->>>>>>>>>>>>>>>>>>>>.))))))).).))))))
tcagggcactgcaattct 1
tcagggcactgcaattctaaa 136
tcagggcactgcaattctaaat 31
tcagggcactgcaattctaa 53
tcagggcactgcaattcta 1
cagggcactgcaattctaa 1
tcagaattgcagtgccttgatt 1
cagaattgcagtgccttga 9
cagaattgcagtgccttgattt 1
cagaattgcagtgccttgat 8
CAGAATTGCAGTGCCTTGATT 556 miRNA
agaattgcagtgccttgatt 7
ptc-miR156a
gagggacacaaaagaaagacTGACAGAAGAGAGTGAGCACacacgaaagtatatggtatgaaggcattccattgcagggtgtgtgctcacatctcttctgtcagcttccacttccaagtgtttcctc 6027
(((((((((..(((.(((.(<<<<<<<<<<<<<<<<<<<<((((....(((.((((.(((....))).)))))))...)))))))))))).))))))))))))))))...)))....))).))))))
ctgacagaagagagtgagcaca 1
ctgacagaagagagtgagcac 133
ctgacagaagagagtgagca 1
tgacagaagagagtgagc 7
tgacagaagagagtgagca 18
tgacagaagagagtgagcaca 790
TGACAGAAGAGAGTGAGCAC 5053 miRNA
tgacagaagagagtgagcacac 1
gacagaagagagtgagcacac 7
gacagaagagagtgagcac 1
gacagaagagagtgagcaca 1
acagaagagagtgagcacaca 1
acagaagagagtgagcacac 13
ptc-miR156b
agaatcgagggttttaagggtaagggaggTGACAGAAGAGAGTGAGCACacagggtactttcttgcatgacatccatgcttgaaactttgcgtgctcactctctatctgtcaccccaccaccatctctctctctttctcttcccctttccctgtct 5892
(((....((((....(((((.((((((((<<<<<<<<<<<<<<<<<<<<.((((((...(((..(((((.....)))))..))))))))).))))))))))))).))))))))).....................)))))).))))).)))).)))
tgacagaagagagtgagc 7
tgacagaagagagtgagca 18
tgacagaagagagtgagcaca 790
TGACAGAAGAGAGTGAGCAC 5053 miRNA
tgacagaagagagtgagcacac 1
gacagaagagagtgagcacac 7
gacagaagagagtgagcac 1
gacagaagagagtgagcaca 1
acagaagagagtgagcacaca 1
acagaagagagtgagcacac 13
ptc-miR156c
ttctggacattagaaacTGACAGAAGAGAGTGAGCACacagaggcatatttgtataaatctataccattgcttttgcgtgctcacttctcattctgtcagcttccagag 6027
(((((((....((...(<<<<<<<<<<<<<<<<<<<<.((((((((.....(((((....)))))...)))))))).)))))))).)))).))))))))))))))))))
ctgacagaagagagtgagcaca 1
ctgacagaagagagtgagcac 133
ctgacagaagagagtgagca 1
tgacagaagagagtgagc 7
tgacagaagagagtgagca 18
tgacagaagagagtgagcaca 790
TGACAGAAGAGAGTGAGCAC 5053 miRNA
tgacagaagagagtgagcacac 1
gacagaagagagtgagcacac 7
gacagaagagagtgagcac 1
gacagaagagagtgagcaca 1
acagaagagagtgagcacaca 1
acagaagagagtgagcacac 13
ptc-miR156d
gattcgagggttttaagggtaagtgagtTGACAGAAGAGAGTGAGCACacagggtactttcttgcatgacgttcatgcttgaagctttgcgtgcccaccctctatctgtcaccccatcaccatctctccttctcttcccctttccttgcctgtc 6218
(((.((((((....(((((.(((.(((.<<<<<<<<<<<-<<<-<<<<.((((((...(((..(((((.....)))))..))))))))).)))).))).)))).)))))))..................))).))).)))))))))))...)))
ttgacagaagagagtgagcac 325
ttgacagaagagagtgagca 1
tgacagaagagagtgagc 7
tgacagaagagagtgagca 18
tgacagaagagagtgagcaca 790
TGACAGAAGAGAGTGAGCAC 5053 miRNA
tgacagaagagagtgagcacac 1
gacagaagagagtgagcacac 7
gacagaagagagtgagcac 1
gacagaagagagtgagcaca 1
acagaagagagtgagcacaca 1
acagaagagagtgagcacac 13
ptc-miR156e
ttccagcttctgggacattagaaatTGACAGAAGAGAGTGAGCACacagaggcatatttgtataaaattataccattgcttttgcgtgctcatttctctttctgtcacttccagagccggaa 6222
((((.(((.((((((..........<<<<<<<<<<<<<<<<<<<<.((((((((.....(((((....)))))...)))))))).))))))).))))).)))))))).))))))))).))))
attgacagaagagagtgagcac 1
ttgacagaagagagtgagcac 325
ttgacagaagagagtgagca 1
tgacagaagagagtgagc 7
tgacagaagagagtgagca 18
tgacagaagagagtgagcaca 790
TGACAGAAGAGAGTGAGCAC 5053 miRNA
tgacagaagagagtgagcacac 1
gacagaagagagtgagcacac 7
gacagaagagagtgagcac 1
gacagaagagagtgagcaca 1
acagaagagagtgagcacaca 1
acagaagagagtgagcacac 13
gctcatttctctttctgtcact 3
ptc-miR156f
gagggtcacaagagaaagacTGACAGAAGAGAGTGAGCACacacgaaagctaattgtatgaaagcataccattgcagggtgtgtgctcacttctcttctgtcagcttacatttgccagtgtttcctc 6040
(((((.(((.(((..(((.(<<<<<<<<<<<<<<<<<<<<((((....((.(((.(((((....))))).)))))...)))))))))))).))))))))))))))))...)))....)))..)))))
ctgacagaagagagtgagcaca 1
ctgacagaagagagtgagcac 133
ctgacagaagagagtgagca 1
tgacagaagagagtgagc 7
tgacagaagagagtgagca 18
tgacagaagagagtgagcaca 790
TGACAGAAGAGAGTGAGCAC 5053 miRNA
tgacagaagagagtgagcacac 1
gacagaagagagtgagcacac 7
gacagaagagagtgagcac 1
gacagaagagagtgagcaca 1
acagaagagagtgagcacaca 1
acagaagagagtgagcacac 13
tgctcacttctcttctgtcagc 13
ptc-miR156g
ttgaattatgtgaggaggcactggtgatgttgTTGACAGAAGATAGAGAGCACagatgatgaaatgcatggagcttaattgcatctcactcctttgtgctctctagtcttctgtcatcaccttcagcccctcactccgtttaa 84529
((((((...((((((.(((...(((((.....-<<<<<<<<<<<<<<<<<<<<(((.(((((.(((((...........))))).))).)).)))))}}}}}}}=}}}}}}}}}}}}})))....)))))))))...))))))
ttgttgacagaagatagagag 1
tgttgacagaagatagagagc 4
tgttgacagaagatagagagcac 1
gttgacagaagatagagagcac 1
ttgacagaagatagagagcacag 1
ttgacagaagatagagagcaca 69
ttgacagaagatagagagca 268
ttgacagaagatagagag 5
ttgacagaagatagagagc 101
TTGACAGAAGATAGAGAGCAC 83296 miRNA
tgacagaagatagagagca 3
tgacagaagatagagagcaca 14
tgacagaagatagagagcac 718
gacagaagatagagagcac 20
acagaagatagagagcac 2
agaagatagagagcacag 1
gctctctagtcttctgtcatc 22
gctctctagtcttctgtcatca 2
ptc-miR156h
gtgaaggaggcactggtgatgctgTTGACAGAAGATAGAGAGCACtgacgatgaaatgcatggagcttaattgcatctcactcctttgtgctctctagtcttctgtcatcaccttcagcccttcac 84723
(((((((..((...(((((.....-<<<<<<<<<<<<<<<<<<<<.((.(((((.(((((...........))))).))).)).)).))}}}}}}}=}}}}}}}}}}}}})))....)))))))))
gctgttgacagaagatagagagcac 1
tgttgacagaagatagagagc 4
tgttgacagaagatagagagcac 1
gttgacagaagatagagagcac 1
ttgacagaagatagagagca 268
ttgacagaagatagagag 5
ttgacagaagatagagagc 101
TTGACAGAAGATAGAGAGCAC 83296 miRNA
ttgacagaagatagagagcact 273
tgacagaagatagagagca 3
tgacagaagatagagagcact 6
tgacagaagatagagagcac 718
gacagaagatagagagcac 20
acagaagatagagagcac 2
gctctctagtcttctgtcatc 22
gctctctagtcttctgtcatca 2
ptc-miR156i
gggagttgtgtggagaggaggcacttgtgatgttgTTGACAGAAGATAGAGAGCACagatgatgttttgcagtagactctggatctcactcctttgtgctctctatgcttctgccatcaccttcagccccgacccccagtcccc 84508
(((..(((.(.((...((.(((....((((((...--<-<<<<<<<<<<<<<<<<<(((.((((...(.(((......))).)...)).)).)))))))))))))).))))))))))))).....)))))...))))))..)))
ttgttgacagaagatagagag 1
tgttgacagaagatagagagc 4
tgttgacagaagatagagagcac 1
gttgacagaagatagagagcac 1
ttgacagaagatagagagcacag 1
ttgacagaagatagagagcaca 69
ttgacagaagatagagagca 268
ttgacagaagatagagag 5
ttgacagaagatagagagc 101
TTGACAGAAGATAGAGAGCAC 83296 miRNA
tgacagaagatagagagca 3
tgacagaagatagagagcaca 14
tgacagaagatagagagcac 718
gacagaagatagagagcac 20
acagaagatagagagcac 2
agaagatagagagcacag 1
gctctctatgcttctgccatc 3
ptc-miR156j
gggggagaaggaggcactggtgatgttgTTGACAGAAGATAGAGAGCACagatgatgatatgcaatggactctgcatcccactcctttgtgctctctatgcttctgtcatcactttcagccccgaccccctcctcctcctcctcc 84519
(((((((.((((((....((((..((((-<<<<<<<<<<<<<<<<<<<<(((.((((..(((((........)))))..)).)).)))))}}}}}}}}}=}}}}}}}}}==.....))))..).)))....)))))).)))))))
ttgttgacagaagatagagag 1
tgttgacagaagatagagagc 4
tgttgacagaagatagagagcac 1
gttgacagaagatagagagcac 1
ttgacagaagatagagagcacag 1
ttgacagaagatagagagcaca 69
ttgacagaagatagagagca 268
ttgacagaagatagagag 5
ttgacagaagatagagagc 101
TTGACAGAAGATAGAGAGCAC 83296 miRNA
tgacagaagatagagagca 3
tgacagaagatagagagcaca 14
tgacagaagatagagagcac 718
gacagaagatagagagcac 20
acagaagatagagagcac 2
agaagatagagagcacag 1
gctctctatgcttctgtca 1
gctctctatgcttctgtcatc 13
ptc-miR156k
tagggcttgaatgagagggagagaagaagagaagaggtgtgaggttatgcatgcTGACAGAAGAGAGGGAGCACaaccctgtaatagctaaagagagtctttgcttttgttggactgtgctttctcttcttctgtcaccaaccaacacagtatcttctctctgatctgatgtgatccacta 19
(((((.(((.((.(((.((((((((((.........((((..(((......((.<<<<<<<<<<<<<--<<<<<(..((..(((.(((.((((.....))))))).)))..))..))))))..))).)))))))))).))))).))))....))))))))))..))).)).))).)).)))
tgacagaagagagggagcaca 3
TGACAGAAGAGAGGGAGCAC 16 miRNA
ptc-miR159b
tggagctccttgaagtccaatagaagctcctgctgggtagatcgagctgctgagctatgaatcccacagccctatcaccatcagtcattttgatgggcctgcggcttgcatatctcaggagctttattacctaatgttagatcttttTTTGGATTGAAGGGAGCTCTa 1329
(({{{{{{{{{=={{{{{{{={((((.((..(((((((((...(((((.(((((.((((....((.(((.(((((((.............))))))).))).))....)))).))))).)))))..)))))))..))..)).)))))->>>>>>>-->>>>>>>>>>)
gagctccttgaagtccaata 1
agctccttgaagtccaata 1
agctccttgaagtccaatag 1
agctgctgagctatgaatcc 2
agctgctgagctatgaatc 1
gcctgcggcttgcatatctca 1
cttgcatatctcaggagcttt 6
ttgcatatctcaggagctt 1
ttgcatatctcaggagcttt 19
tttttggattgaagggagctcta 1
tttggattgaagggagctcta 524
TTTGGATTGAAGGGAGCTCT 671 miRNA
tttggattgaagggagctc 47
tttggattgaagggagct 40
ttggattgaagggagctct 4
ttggattgaagggagctc 3
ttggattgaagggagctcta 5
tggattgaagggagctct 1
ptc-miR159c
gggagtggagctccttgaagtccaatagaggttcttgctgggtagattaagctgctaagctatggatccacagtcctatctatcaaccgaaggataggtttgcggcttgcatatctcaggagctttattgcctaatgttagatcccttTTTGGATTGAAGGGAGCTCTaaaccc 1370
(((..(({{{{{{{{{=={{{{{{{={((((.(((.(((((((((...(((((.((.((.((((.(.((.(((.(((((((.((....)).))))))).))).))..).)))).)).)).)))))..)))))))..)).)))..))))>>>>>>>>-->>>>>>>>>>)..)))
gagctccttgaagtccaata 1
agctccttgaagtccaata 1
agctccttgaagtccaatag 1
agctgctaagctatggat 1
cttgcatatctcaggagcttt 6
ttgcatatctcaggagctt 1
ttgcatatctcaggagcttt 19
ttgcctaatgttagatccctt 1
tttttggattgaagggagctcta 1
tttggattgaagggagctctaaa 17
tttggattgaagggagctcta 524
TTTGGATTGAAGGGAGCTCT 671 miRNA
tttggattgaagggagctc 47
tttggattgaagggagct 40
tttggattgaagggagctctaa 23
ttggattgaagggagctctaaac 1
ttggattgaagggagctct 4
ttggattgaagggagctc 3
ttggattgaagggagctctaa 1
ttggattgaagggagctctaaa 1
ttggattgaagggagctcta 5
tggattgaagggagctct 1
ptc-miR160a
agaagaaggtgacatgggttaTGCCTGGCTCCCTGTATGCCAcaagcaaagaccaatcttttgttttagattggctgttgccggtggcgtgcgaggagccaagcatactctctctttctct 39
(((.(((((.((...((((.(<<<-<<<<<<<-<<<<<<<<<(..((((((.(((((((........))))))))).))))..)))}}}}}}}=}}}}}}}=}}}}}))))).))))))))
TGCCTGGCTCCCTGTATGCCA 22 miRNA
gcctggctccctgtatgccac 1
gcctggctccctgtatgcca 1
ttgccggtggcgtgcgaggag 3
gcgtgcgaggagccaagcata 12
ptc-miR160b
accatgcatccatatatattatatgTGCCTGGCTCCCTGTATGCCAtttgcagagcccaacggatcctcgatggcctccgtggatggcgtatgaggagccatgcatattcgcatgtatattatacatggt 26
((((((.....((((((((...(((<<<-<<<<<<<--<<<<<<<<((..(.(((.(((.(((....))).))).))).)..))))}}}}}}==}}}}}}}=}}}}})....))))))))....))))))
TGCCTGGCTCCCTGTATGCCA 22 miRNA
gcctggctccctgtatgcca 1
ccgtggatggcgtatgaggag 1
gcgtatgaggagccatgcata 2
ptc-miR160c
ccatcatgcatccatatatattatatgTGCCTGGCTCCCTGTATGCCAtttgcagagcccaccggttcttcgatggcctccgtggatggcgtatgaggagccatgcatattcacatgtatatatccatggttttcacttgcagatgg 26
(((((.((((.((((((((((...(((<<<-<<<<<<<--<<<<<<<<((..(.(((.(((.(((....))).))).))).)..))))}}}}}}==}}}}}}}=}}}}})......)))))))....)))........)))))))))
TGCCTGGCTCCCTGTATGCCA 22 miRNA
gcctggctccctgtatgcca 1
ccgtggatggcgtatgaggag 1
gcgtatgaggagccatgcata 2
ptc-miR160d
gcatcgaagaaggaggtgaaatgggttaTGCCTGGCTCCCTGTATGCCAcagcaaagaccaatctcttctgtcttagattggctgctgccggtggcgtgcgaggagccaagcatactctctcctttctatctctatgt 36
((((.((.((((((((.((...((((.(<<<-<<<<<<<-<<<<<<<<<(.(((.((.(((((((..........)))))))))..)))..)))}}}}}}}=}}}}}}}=}}}}})))..)))))))).)))).))))
TGCCTGGCTCCCTGTATGCCA 22 miRNA
gcctggctccctgtatgccac 1
gcctggctccctgtatgcca 1
gcgtgcgaggagccaagcata 12
ptc-miR162a
ggtggttgggaagacactggaggcagcggttcatcgatctcttcctggccaattttttgtttagcacgaaaaacatgaaccgaTCGATAAACCTCTGCATCCAGcgcttcctttattcccc 273
((.((..((((((.(.(((((.((((.((((.(((((((..(((.((.....((((((((.....)))))))))).)))..))>>>>>->>>>->>>>->>>>>.))))))).....))))
tggaggcagcggttcatcgatc 1
tcgataaacctctgcatcc 2
tcgataaacctctgcatcca 3
TCGATAAACCTCTGCATCCAG 263 miRNA
gataaacctctgcatccag 4
ptc-miR162b
atgtaaagaagagattgcttttgagtttggttgagaagacactggaggcagcggttcatcgatcttttcctgaagatttttttgttttacacgaacaacacgaaccgaTCGATAAACCTCTGCATCCAGtgcttcccttactccacttttttttcttttcat 277
(((.((((((((((..(.....((((..((....((((.(((((((.((((.((((.(((((((..(((.((.........((((((.....)))))))).)))..))>>>>>->>>>->>>>->>>>>))))))))..))))..)..)))))))))).)))
tggaggcagcggttcatcgatc 1
tcgataaacctctgcatccagt 4
tcgataaacctctgcatcc 2
tcgataaacctctgcatcca 3
TCGATAAACCTCTGCATCCAG 263 miRNA
gataaacctctgcatccag 4
ptc-miR164a
gggcgagcggttccttgcTGGAGAAGCAGGGCACGTGCAaaatcctgatgaagtgcttacactttgcacgcgctcttcttctccaacacgggctcctcacct 2929
(((.(((.(((.((.((.<<<<<<<<-<<<<<-<<<<<<(...........((((....))))))))))).))))).)))))))).)).))))).))).)))
ctggagaagcagggcacgtgca 3
TGGAGAAGCAGGGCACGTGCA 2901 miRNA
tggagaagcagggcacgtgc 11
tggagaagcagggcacgtg 5
tggagaagcagggcacgtgcaaa 5
tggagaagcagggcacgtgcaaaa 2
ggagaagcagggcacgtgca 1
gagaagcagggcacgtgca 1
ptc-miR164d
gccaaccaagggaatggaattctgatgggtgggtggctcacgcTGGAGAAGCAGGGCACGTGCAaaatccttctcggcttccagatgctgatgaagcactctttgcacgtgctcccctcctccaacatgagttcctcacccctgtctctcttcagtctccattgctgaaagc 2929
((.......((.((((((...((((.(((((((..(((((.(.<<<<<-<<--<<<<<<<<<<<((...(((((((((........))))).)))).....)))))))))))))..)).))))).).)))))..)))))))..........))))..)))))).))....))
ctggagaagcagggcacgtgca 3
TGGAGAAGCAGGGCACGTGCA 2901 miRNA
tggagaagcagggcacgtgc 11
tggagaagcagggcacgtg 5
tggagaagcagggcacgtgcaaa 5
tggagaagcagggcacgtgcaaaa 2
ggagaagcagggcacgtgca 1
gagaagcagggcacgtgca 1
ptc-miR166a
gaaatggaagctatttcttttgaggggaatgttgtctggctcgaggtcactaatgggatctatgattttatctcaattgattgattttcttttaaattctagtaaattgaattgagagatatcatgatcaacttatatttaatgatgTCGGACCAGGCTTCATTCCCCccaattgtttcttcctttc 180
((((.(((((......(..(((.(({{{{{{=={{{{{{=={{{={(((..((((.((((.(((((....(((((((...(..((((.((..........)).))))..))))))))...)))))))))......))))...)))).>>>-->>>>>>-->>>>>>>>.)))..)...)))))))))
ggaatgttgtctggctcgagg 4
tcggaccaggcttcattcc 10
tcggaccaggcttcattccccc 2
tcggaccaggcttcattccc 6
TCGGACCAGGCTTCATTCCCC 150 miRNA
tcggaccaggcttcattc 5
cggaccaggcttcattccc 1
cggaccaggcttcattcccc 2
ptc-miR166b
tctttctcctctttcgcatgtattaactgttgaggggattgctgtctggttcgatgtcattcatgtgaagctttaacattaatgtagtattgagtgattTCGGACCAGGCTTCATTCCCCccaactatatttgtttagcattcggagggtgtaataaga 264
((((...(.(((((((.((((...(((.((((.(((((.((..(((((((((((.((((((((.(((..((.(((....))).))..))))))))))).>>>>>>>>>>>-->>->>>>>.)))).......)))..)))).))))))).)....))))
tttcggaccaggcttcattcc 1
ttcggaccaggcttcattc 1
ttcggaccaggcttcattcc 1
ttcggaccaggcttcattccc 39
ttcggaccaggcttcattcccc 46
tcggaccaggcttcattcc 10
tcggaccaggcttcattccccc 2
tcggaccaggcttcattccc 6
TCGGACCAGGCTTCATTCCCC 150 miRNA
tcggaccaggcttcattc 5
cggaccaggcttcattccc 1
cggaccaggcttcattcccc 2
ptc-miR166c
gggagcatctttttttgaggggaatgttgtctggctcgaggactctttcttgatcagtctgatcaagtgttctatctttagatctaatatcttagatcatgtgttagggtcgTCGGACCAGGCTTCATTCCCCccaattattgcttcc 180
(((((((....(..(((.(({{{{{{=={{{{{{=={{{={(((((..(((((((.....))))))).............(((((((....))))))).......)))))).>>>-->>>>>>-->>>>>>>>.)))..).)))))))
ggaatgttgtctggctcgagg 4
tcggaccaggcttcattcc 10
tcggaccaggcttcattccccc 2
tcggaccaggcttcattccc 6
TCGGACCAGGCTTCATTCCCC 150 miRNA
tcggaccaggcttcattc 5
cggaccaggcttcattccc 1
cggaccaggcttcattcccc 2
ptc-miR166e
cctcaccccatctctccctctcgcgtattaactgttgaggggattgtcgtctggttcgatgtcattcatgagaagctcaaacataaacgtaatattgaatgattTCGGACCAGGCTTCATTCCCCccaacaatgtttgattagcgttcacagaatggattgagg 265
(((((..((((.(((......(((.....((((((((.(((((.((..(((((((((((.((((((((.(((...)))..((......)).....)))))))).>>>>>>>>>>>-->>->>>>>.)))))..)))......))).....)))))))..)))))
ggattgtcgtctggttcgatgt 1
tttcggaccaggcttcattcc 1
ttcggaccaggcttcattc 1
ttcggaccaggcttcattcc 1
ttcggaccaggcttcattccc 39
ttcggaccaggcttcattcccc 46
tcggaccaggcttcattcc 10
tcggaccaggcttcattccccc 2
tcggaccaggcttcattccc 6
TCGGACCAGGCTTCATTCCCC 150 miRNA
tcggaccaggcttcattc 5
cggaccaggcttcattccc 1
cggaccaggcttcattcccc 2
ptc-miR166h
tgattgctacacagttgaggggaatgctgtctgattcgagaccattcactttaagcacacattcatctttcgaatgaTCTCGGACCAGGCTTCATTCCccccaactcaaaatca 1731
(((((.......(((((.((((((((..(((((.(((((((.(((((........................))))).>>>>>>>->>>>>-->>>>>>)).)))))...)))))
cgaatgatctcggaccaggct 1
atctcggaccaggcttcattc 2
atctcggaccaggcttcattcc 3
atctcggaccaggcttcattcccc 11
tctcggaccaggcttcatt 6
tctcggaccaggcttcat 8
TCTCGGACCAGGCTTCATTCC 1490 miRNA
tctcggaccaggcttcattc 19
ctcggaccaggcttcattcccc 1
ctcggaccaggcttcattccc 12
ctcggaccaggcttcattcc 2
tcggaccaggcttcattcc 10
tcggaccaggcttcattccccc 2
tcggaccaggcttcattccc 6
tcggaccaggcttcattcccc 150
tcggaccaggcttcattc 5
cggaccaggcttcattccc 1
cggaccaggcttcattcccc 2
ptc-miR166i
ggaagcttgtcttttgaggggaatgttgtttggttcaaggcctggccaccccatgtcttggaatttaaaatatcatgtccTCGGACCAGGCTTCATTCCCCtcaattactgcttcc 203
((((((..((...(((({{{{{{{{=={{{{{{{{{={(((.(((.....))).)))).(((...............)))-->>>>>>>>>-->>>>>>>>))))..)).))))))
ggggaatgttgtttggttcaa 1
gggaatgttgtttggttcaa 1
ctcggaccaggcttcattcccc 1
ctcggaccaggcttcattccc 12
ctcggaccaggcttcattcc 2
tcggaccaggcttcattcc 10
tcggaccaggcttcattccc 6
tcggaccaggcttcattcccct 12
TCGGACCAGGCTTCATTCCCC 150 miRNA
tcggaccaggcttcattc 5
cggaccaggcttcattccc 1
cggaccaggcttcattcccc 2
ptc-miR166j
ggtagcttcttttttgaggggaatgttgtctggctcgaggactttttgttcatcaatctaatcgaactttctacctgtagatctagtatcttatttaagattgatcacgtattagggttgTCGGACCAGGCTTCATTCCCCccaatcattgcttcc 180
((.(((.......(((.(({{{{{{=={{{{{{=={{{={(((((.(((..((((((((((..(((((.((((....))))...))).))....)).)))))))).)))....)))))).>>>-->>>>>>-->>>>>>>>.))).....))).))
ggaatgttgtctggctcgagg 4
tcggaccaggcttcattcc 10
tcggaccaggcttcattccccc 2
tcggaccaggcttcattccc 6
TCGGACCAGGCTTCATTCCCC 150 miRNA
tcggaccaggcttcattc 5
cggaccaggcttcattccc 1
cggaccaggcttcattcccc 2
ptc-miR166k
ggtagcttcttttttgaggggaatgttgtctggctcgaggactttttgttcatcaatctaatcgaactttctacctgtagatctagtatcttatttaagattgatcacgtattagggttgTCGGACCAGGCTTCATTCCCCccaatcattgcttcc 180
((.(((.......(((.(({{{{{{=={{{{{{=={{{={(((((.(((..((((((((((..(((((.((((....))))...))).))....)).)))))))).)))....)))))).>>>-->>>>>>-->>>>>>>>.))).....))).))
ggaatgttgtctggctcgagg 4
tcggaccaggcttcattcc 10
tcggaccaggcttcattccccc 2
tcggaccaggcttcattccc 6
TCGGACCAGGCTTCATTCCCC 150 miRNA
tcggaccaggcttcattc 5
cggaccaggcttcattccc 1
cggaccaggcttcattcccc 2
ptc-miR166l
gctagctaggaagcttaacttttgtggtgaatgttgtctggttcaaggcatggccaccacatctcttggtgaatatatgtccTCGGACCAGGCTTCATTCCCCtcaattaatgcttccatacatgc 202
((......((((((((((...(((.((.(((((..(((((((((.(((((((..(((((.......)))))....)))).))>->>>>>>>>>-->>>>>->>.))))))).))))))......))
aatatatgtcctcggaccaggctt 1
ctcggaccaggcttcattcccc 1
ctcggaccaggcttcattccc 12
ctcggaccaggcttcattcc 2
tcggaccaggcttcattcc 10
tcggaccaggcttcattccc 6
tcggaccaggcttcattcccct 12
TCGGACCAGGCTTCATTCCCC 150 miRNA
tcggaccaggcttcattc 5
cggaccaggcttcattccc 1
cggaccaggcttcattcccc 2
ptc-miR166m
aagggcgtgttgttttaggaaagtgaggatgtgggggaatgtcgtctgactcgagacaacaggtaaactgaaggaatggccggagtttaagagttcTCTCGGACCAGGCTTCATTCCcctcatccacaccttctcctcctcgacctt 1729
((((.((.(..(.....((((.(((.(((((.(({{{{{{{=={{{{{=={{{{{(.(((...((((((...((.....))..))))))...))).>>>>>>-->>>>>-->>>>>>)))))))).))).)))).)..).)).))))
gaggatgtgggggaatgtcg 1
gaggatgtgggggaatgtcgtc 1
gggaatgtcgtctgactcgag 1
gggaatgtcgtctgactcgaga 2
tctcggaccaggcttcatt 6
tctcggaccaggcttcat 8
TCTCGGACCAGGCTTCATTCC 1490 miRNA
tctcggaccaggcttcattc 19
ctcggaccaggcttcattcccc 1
ctcggaccaggcttcattccc 12
ctcggaccaggcttcattcc 2
tcggaccaggcttcattcc 10
tcggaccaggcttcattccc 6
tcggaccaggcttcattcccct 12
tcggaccaggcttcattcccc 150
tcggaccaggcttcattc 5
cggaccaggcttcattccc 1
cggaccaggcttcattcccc 2
ptc-miR166q
gttgagaggaatgttgtctggctcgaggtcattgaggccatgattatacagacatggcattacctgatgacagccgagaaaattcaaagtctgtgtgtatcttgtacctcgatgatTCTCGGACCAGGCTTCATTCCttccaac 1562
((((..({{{{{{=={{{{{{=={{{{{(((((((((.((.((((((((((((..(((..............)))..((....))...))))))))).))).))..))))))))).>>>>>-->>>>>>-->>>>>>)..))))
ggaatgttgtctggctcgagg 4
tctcggaccaggcttcatt 6
tctcggaccaggcttcat 8
TCTCGGACCAGGCTTCATTCC 1490 miRNA
tctcggaccaggcttcattcct 10
tctcggaccaggcttcattc 19
ctcggaccaggcttcattcct 1
ctcggaccaggcttcattcc 2
tcggaccaggcttcattcc 10
tcggaccaggcttcattcctt 7
tcggaccaggcttcattc 5
ptc-miR167a
tcgtgcaccactagcagtTGAAGCTGCCAGCATGATCTAacttccttgcttctttatcaaggatggatttagatcatgtggtggtttcacctgttgatggcaccacgg 59
(((((..(((.((((((.<<<<<<--<<<-<<<<<<<<<(((((((((.........)))))).))..)))))))))))))..)))))).)))))).)))...)))))
tgaagctgccagcatgatc 3
tgaagctgccagcatgatct 1
TGAAGCTGCCAGCATGATCTA 54 miRNA
tgaagctgccagcatgatctaa 1
ptc-miR167b
gttcactagggaaaaagTGAAGCTGCCAGCATGATCTAtctttggttagagaaagaaaggactaaccctagctaggtcatgctgtgacagcctcactccttcctatttggggac 62
((((.((((((((..((<<<-<<<<<<<<<<<<<<<<<.((..((((((............))))))..)).)))))))))))).).)))).)))))..)))))...)))))))
aaagtgaagctgccagcatga 1
tgaagctgccagcatgatctatc 1
tgaagctgccagcatgatc 3
tgaagctgccagcatgatctat 1
tgaagctgccagcatgatct 1
TGAAGCTGCCAGCATGATCTA 54 miRNA
ggtcatgctgtgacagcctcact 1
ptc-miR167c
gttgatcatctctcgtgcaccactagcagtTGAAGCTGCCAGCATGATCTAaattaacctccttctttatcaaggatggattagatcatgtggtagtttcacctgctgatggcatcacgaaaaaaccctagc 59
((((........(((((..(((.((((((.<<<<<<<<<<<-<<<<<<<<<(.....(((((((.......))))).)).))))))))))))))))))))).)))))).)))...)))))........))))
tgaagctgccagcatgatc 3
tgaagctgccagcatgatct 1
TGAAGCTGCCAGCATGATCTA 54 miRNA
tgaagctgccagcatgatctaa 1
ptc-miR167d
gtggttaaaagaagttcacaagggaaaaggTGAAGCTGCCAGCATGATCTAtctttggttagagaaggatagaagcgaaagaactaaccctagctaggtcatgctctgacagcctcactccttcctatttggggacccat 60
((((.........((((.((((((((..((<<<-<<<<<-<<<<<<<<<<<.((..((((((.............(....)..))))))..)).)))))))))))..).)))).)))))..)))))..))).))))))))
tgaagctgccagcatgatctatc 1
tgaagctgccagcatgatc 3
tgaagctgccagcatgatctat 1
tgaagctgccagcatgatct 1
TGAAGCTGCCAGCATGATCTA 54 miRNA
ptc-miR167e
gagcggatagacctaatcatgcaccactagtagtTGAAGCTGCCAGCATGATCTGAactttccttaattttcctatacgggaaagactagatcatgtggtagtttcatctattgatggtagcatgggaaaccctaatcagctt 125
((((.(((((......((((((((((.((((((.<<<<<<<<<<<-<<<<<<<<<-.(((((((..............))))))).=}}}}}}}}}}}}}}}}}}}}.)))))).)))).))))))......)).))).))))
tgaagctgccagcatgatc 3
tgaagctgccagcatgatct 1
tgaagctgccagcatgatctgaact 1
tgaagctgccagcatgatctgaa 4
TGAAGCTGCCAGCATGATCTGA 56 miRNA
tgaagctgccagcatgatctg 52
aagctgccagcatgatctgaac 4
ctagatcatgtggtagtttca 1
agatcatgtggtagtttcatc 2
gatcatgtggtagtttcatc 1
ptc-miR167f
tcgtgcacctctatcagtTGAAGCTGCCAGCATGATCTTagccttcctcctttgttgaggaaagaaacagatcatgtggcagtttcacctgttgttggtatcacga 11
(((((.(((..((.(((.<<<<<<<<<<<-<<<<<<<<-..(.((((((.......)))))).)....))))))))))))))))))).))).))..)))..)))))
TGAAGCTGCCAGCATGATCTT 6 miRNA
tgaagctgccagcatgatc 3
tgaagctgccagcatgatct 1
tgaagctgccagcatgatctta 1
ptc-miR167g
tcgtgcaccactatcagtTGAAGCTGCCAGCATGATCTTaacctccctcctttgtcgaggaaagaacagatcatgtggcagtttcacctgaagttggtatcacga 11
(((((.((((((.((((.<<<<<<<<<<<-<<<<<<<<-......((((.......)))).......))))))))))))))))))).)))))).))))..)))))
TGAAGCTGCCAGCATGATCTT 6 miRNA
tgaagctgccagcatgatc 3
tgaagctgccagcatgatct 1
tgaagctgccagcatgatctta 1
ptc-miR168a
ttaccggcggtctctgatTCGCTTGGTGCAGGTCGGGAActgattcggcgatttgattgccagatggctcgacatgactggttgttgtggaaaaagaaaaggaaggaaacaggaaaaaaaacaaagaatagcgaattggatcccgccttgcatcaactgaatcggaggccgcggtga 2501
((((((.(((((((((((<<<-<<<<<<<<<<-<<<<<-(..(((((.(..((((...(((....)))....((..((.....))..))...............(....)...........)))).....))))))==}=}}}}}=}}}}}}}}}}=))))))))))))))))))))
tcgcttggtgcaggtcgggaac 1
TCGCTTGGTGCAGGTCGGGAA 2209 miRNA
tcgcttggtgcaggtcggga 4
cgcttggtgcaggtcgggaac 2
cgcttggtgcaggtcgggaa 9
gcttggtgcaggtcgggaa 12
cttggtgcaggtcgggaa 1
tggtgcaggtcgggaactg 1
tggtgcaggtcgggaactgat 1
ttggatcccgccttgcatcaa 5
tggatcccgccttgcatcaac 4
gatcccgccttgcatcaactgaat 2
atcccgccttgcatcaactgaat 1
tcccgccttgcatcaactgaa 2
cccgccttgcatcaactgaa 2
cccgccttgcatcaactgaat 240
cccgccttgcatcaactgaatc 1
ccgccttgcatcaactgaat 1
cgccttgcatcaactgaatcgg 1
gccttgcatcaactgaatcgg 1
ccttgcatcaactgaatcggag 1
ptc-miR168b
ttaccggcggtctctaatTCGCTTGGTGCAGGTCGGGAActgattcggcgatttgattgccagatggctaaacacgattggctgtgaggcaaattataaaaagaaagagaattggatcccgccttgcatcaactgaatcggagaccgcggtga 2503
((((((.(((((((..((<<<-<<<<<<<<<<-<<<<<-(..((((..(....((((((((..((((((((......))))))))..))).)))))......).....))))==}=}}}}}=}}}}}}}}}}=)))))..)))))))))))))
aattcgcttggtgcaggtcgg 1
tcgcttggtgcaggtcgggaac 1
TCGCTTGGTGCAGGTCGGGAA 2209 miRNA
tcgcttggtgcaggtcggga 4
cgcttggtgcaggtcgggaac 2
cgcttggtgcaggtcgggaa 9
gcttggtgcaggtcgggaa 12
cttggtgcaggtcgggaa 1
tggtgcaggtcgggaactg 1
tggtgcaggtcgggaactgat 1
ttggatcccgccttgcatcaa 5
tggatcccgccttgcatcaac 4
gatcccgccttgcatcaactgaat 2
atcccgccttgcatcaactgaat 1
tcccgccttgcatcaactgaa 2
cccgccttgcatcaactgaa 2
cccgccttgcatcaactgaat 240
cccgccttgcatcaactgaatc 1
ccgccttgcatcaactgaat 1
cgccttgcatcaactgaatcgg 1
gccttgcatcaactgaatcgg 1
ccttgcatcaactgaatcggag 1
atcaactgaatcggagaccgc 1
ptc-miR169a
gcacaaagtggtatgCAGCCAAGGATGACTTGCCGActtaactgatctgtataaattaatgcatgtgtagtcaaaattactactactatatattaatctgatctgtgaccacaaattaactaactactagctagtaattagttggcaagttgtccatggctacatgctgctttttgc 56
(((.((((..(((((-<<<<<-<<<--<<<<<<<<<((..((((....(((...(((((((.(((((((((.......))))).)).)).))))))).((((.(((....))).))))......)))....))))....)))))))))))..))).))))).)))))..)))).)))
CAGCCAAGGATGACTTGCCGA 53 miRNA
agccaaggatgacttgccga 3
ptc-miR169c
gccttgcatggaggctcataaagtttgatgCAGCCAAGGATGACTTGCCGAcgactcaatttttgcttccatatggtagaagagatgaataggttggcaggttttccttggctacattttcctttctgctcctcctgctaggt 56
((((.(((.(((((..((.((((...((((-<<<<<<<<<-<<<<<<<<<<(.(.(((.(((((.((.((....)).))))))).))).)..))))))))))).))))))))).))))...)))).))..)))))))).))))
CAGCCAAGGATGACTTGCCGA 53 miRNA
agccaaggatgacttgccga 3
ptc-miR169d
ggtctaggagttttgcatgaagaggtagagagtcgaatgCAGCCAAGGATGACTTGCCGGcatttcctcctaagtagcgagcccggcaaggcttctatttggcacgcccggccggcgggttgtccttggctatatttggttcccttcttctcatgtgaaactccaggcc 104
(((((.(((((((..(((((.((((.((.((..((((((-<<<<<<<<<--<<<<<<<<<(........((((((((.(((((......)))))))))))))........)))}}}}}}}==}}}}}}}}}=}}))))..)).)).)))))))))..))))))))))))
cagccaaggatgacttgccggc 1
CAGCCAAGGATGACTTGCCGG 49 miRNA
cagccaaggatgacttgccggca 1
agccaaggatgacttgccgg 1
ggcgggttgtccttggctat 22
ggcgggttgtccttggcta 3
ggcgggttgtccttggctata 23
ggcgggttgtccttggct 1
gcgggttgtccttggctat 2
gcgggttgtccttggctata 1
ptc-miR169g
ggtgtaggggttttgcatgaagaggtagagagtagaatgCAGCCAAGGATGACTTGCCGGcatttcctcctaggtagctagcaagccttctatttggcatgcctgtccggcaggttgtccttggctaaattttgttctcttcttctcatgtgagactccaggcc 52
(((.(.(((((((..(((((.((((.((((((((((((.-<<<<<<<<<--<<<<<<<<<((...((.....))......(((.(((........))).))).)).)))))))))..)))))))))..)))))))))))).)))))))))..)))))))).)))
cagccaaggatgacttgccggc 1
CAGCCAAGGATGACTTGCCGG 49 miRNA
cagccaaggatgacttgccggca 1
agccaaggatgacttgccgg 1
ptc-miR169h
ggggcttacatgaagaggtagagagtgtaattCAGCCAAGGATGACTTGCCGGcagcacgggatctcagagcttaataactagaagatcaaggctgtcattacttttccggccggcaagttgcccttggctacattgtactctcttcttctcatgtaaggcct 88
(((.(((((((((.((((.((((((((((((.-<<<<<<<<--<<<<<<<<<<((((.(..(((((...((........))...)))))..))))...............)))}}}}}}}}==}}}}}}}}==}))))))))))).))))))))))))).)))
tgaagaggtagagagtgtaat 2
tgaagaggtagagagtgtaatt 25
cagccaaggatgacttgccggc 1
CAGCCAAGGATGACTTGCCGG 49 miRNA
cagccaaggatgacttgccggca 1
agccaaggatgacttgccgg 1
aaggatgacttgccggcagca 1
ggcaagttgcccttggctac 1
ggcaagttgcccttggctaca 1
tggctacattgtactctcttc 1
ttgtactctcttcttctcatg 5
ptc-miR169j
tgagaggaagggaggccttacatgaagacaagagtcttgtttgaTAGCCAAGGATGACTTGCCTGctacttgcaagagtttctgcaaagagatcagaaccaaatatgcatggaattatatgtaatgaaactcttgtttgattgccaggcagtctccttggctagcctgacaggctcttctctctcatgctaggccttctcttcttcca 27
((.(((((((((((((((..((((((((.((((((((.(((...<<<<<<<<<<-<<<<-<<<<<(..(..(((((((((((......(....)...........((((((......))))))..)))))))))))..)...).)))))))))))))))))))....))))))))))).))).)))))..)))))))).)))))))))
TAGCCAAGGATGACTTGCCTG 22 miRNA
tagccaaggatgacttgc 2
tagccaaggatgacttgcctgc 1
ggcagtctccttggctagc 2
ptc-miR169n
atcttgcatgaagtgatagagagtggattTGAGCCAAGGATGACTTGCCGcagatgcatggtccttgctgctgatcacataccaaggggggttttgggtggcaagcatccttggttctccttcgctctgtatttcctcatgcgagat 406
(((((((((((.(.((((.((((((((..-<<<<<<<<<<<<-<<<<<<<(.((.((....((((((.((.((....)))).))))))..)).))..)}}}}}}}}}}}}}}}}}}}==.)))))))).)))).).)))))))))))
tgaagtgatagagagtggatt 2
agagagtggatttgagccaa 1
gtggatttgagccaaggatga 3
gtggatttgagccaaggatg 1
tgagccaaggatgacttgccgc 16
TGAGCCAAGGATGACTTGCCG 278 miRNA
tgagccaaggatgacttgc 2
tgagccaaggatgacttg 1
gagccaaggatgacttgccg 1
tggcaagcatccttggttctc 1
gcaagcatccttggttctcct 14
gcaagcatccttggttctcc 70
gcaagcatccttggttct 1
gcaagcatccttggttctc 15
ptc-miR169q
gagagacctaacatgaaaataagagtcttgttagtTAGCCAAGGACGACTTGCCTGTtcctagcaatttgggatttgccctggactaagaggcaggaccctcattccgggtttcaggcagtctccttggctaggttgacaggctcttctttgtcatgccaggccttctc 22
(((((.(((..((((((((.((((((((.((((.(<<<<<<<<<<-<<<<-<<<<<-.((..(.(((..(((.((((((((......)).)))))).)))..))))..))...)))))))))))))))))))).).))))))))))).))).)))))..)))..)))))
tagccaaggacgacttgcc 3
tagccaaggacgacttgc 1
tagccaaggacgacttgcct 2
TAGCCAAGGACGACTTGCCTGT 11 miRNA
tagccaaggacgacttgcctg 4
agccaaggacgacttgcc 1
ptc-miR169s
ttgccttgggggcttgcatgaagaggtagagagtgtgattCAGCCAAGGATGACTTGCCGGcagcaggtaagagcaaagctccgtttttggaagttcaaggatatcttaacttttccggccggcaagctgtccttggctacattgtactctcttcttctcatgcaagaactacttggtaa 97
(((((...((..(((((((((.((((.((((((((..((.-<<<<<<<<<<--<<<<<<<<(....((.(((((..(((....((((((((....))))))))..)))..))))))).)))}}}}}}==}}}}}}}}}}==))..)))))))).)))))))))))))..))....)))))
ttgcatgaagaggtagagagtg 1
atgaagaggtagagagtgtgat 5
tgaagaggtagagagtgtgatt 31
cagccaaggatgacttgccggc 1
CAGCCAAGGATGACTTGCCGG 49 miRNA
cagccaaggatgacttgccggca 1
agccaaggatgacttgccgg 1
aaggatgacttgccggcagca 1
ggcaagctgtccttggctac 1
tggctacattgtactctcttc 1
ttgtactctcttcttctcatg 5
ptc-miR169u
ggaagagaggtcttgtatgaagatgaagaggtagagagtttggTAGCCAAGGACGACTAGCCTAtttcctccattgggttctcaaaagaatgaaatgtcgttcagagctcactggtagggttcataggcagtctcctttggctatcctaactggctctcatttttcatgctagacctacatctcttct 1580
(((((((((((((.((((((((((((.(((.(((..((...((<<<<<<<<<<-<<<<-<<<<<(.(((((((.((((((((.....((((((....)))))))))))))).))).)))).==}}}}}}}}}}}}}=}}}}}))))))..))).)))))).))))))))).)))))....))))))))
tagccaaggacgactagcc 24
tagccaaggacgactagcctatt 2
tagccaaggacgactagcct 14
tagccaaggacgactagcctattt 1
tagccaaggacgactagcctat 5
tagccaaggacgactagc 1
TAGCCAAGGACGACTAGCCTA 1521 miRNA
tcataggcagtctcctttggc 1
taggcagtctcctttggcta 1
taggcagtctcctttggctatc 8
aggcagtctcctttggctatc 1
ggcagtctcctttggctatc 1
ptc-miR171a
gtttcttcagagaaaacgggatattggtacggttcaatcagaaagtaatgctcccaaaagtatagagtactattgttTGATTGAGCCGTGCCAATATCacgtacactcatcttcctctcgaggaac 35
(((((((.((((.(((((={{{{{{{{{{{{{{{{{{{{(((.((((.(((((...........))))).)))).))>>>>>>>>>>>>>>>>>>>>>.))).........)).)))).)))))))
ggatattggtacggttcaatc 9
tattggtacggttcaatcag 1
ttgtttgattgagccgtgcca 2
TGATTGAGCCGTGCCAATATC 12 miRNA
tgattgagccgtgccaatat 1
ttgagccgtgccaatatcacgt 4
ttgagccgtgccaatatcac 1
ttgagccgtgccaatatcacg 5
ptc-miR171b
gtcaacataattatatataacgagatattggtgcggttcaatcagatagtaatgctccataagcatagagctctattgttTGATTGAGCCGTGCCAATATCacgtatatgttgc 28
(.(((((((..........(((={{{{{{{{=={{{{{{{{{{((((((((..((((.((....)).))))..)))))))>>>>>>>>>>>-->>>>>>>>.))).))))))))
agatattggtgcggttcaatc 3
ttgtttgattgagccgtgcca 2
TGATTGAGCCGTGCCAATATC 12 miRNA
tgattgagccgtgccaatat 1
ttgagccgtgccaatatcacgt 4
ttgagccgtgccaatatcac 1
ttgagccgtgccaatatcacg 5
ptc-miR171c
gctggatgctaaggaggcaaaagaaagcgatgttggtgaggttcaatccgaagacggatttacacgtgaaagtaattgtaaaatacgatctcagaTTGAGCCGCGCCAATATCACTttctcagggttatttgctttcccagc 55
(((((.......(((((((((((((((={{{{{{{{{{={{{{{{{{{.((.((((..((((((.((.......))))))))...)).)))).))>>>>>>>->>>>>>>>>>->>))))........))))))))))))))
aagcgatgttggtgaggttcaatc 1
cgatgttggtgaggttcaatc 15
cgatgttggtgaggttcaa 2
agattgagccgcgccaatatc 1
TTGAGCCGCGCCAATATCACT 18 miRNA
ttgagccgcgccaatatca 1
ttgagccgcgccaatatcactt 14
ttgagccgcgccaatatcac 3
ptc-miR171d
gaaagcgatgttggtgaggttcaatccgaagacagatttacacgagtgaaagtaaaatccgatctcagaTTGAGCCGCGCCAATATCACTttt 55
(((((={{{{{{{{{{={{{{{{{{{.((.(((.(((((..((........)).))))).).)))).))>>>>>>>->>>>>>>>>>->>)))
aagcgatgttggtgaggttcaatc 1
cgatgttggtgaggttcaatc 15
cgatgttggtgaggttcaa 2
agattgagccgcgccaatatc 1
TTGAGCCGCGCCAATATCACT 18 miRNA
ttgagccgcgccaatatca 1
ttgagccgcgccaatatcactt 14
ttgagccgcgccaatatcac 3
ptc-miR171e
aatttgatgttggcagagctcaatcaaatcaaagcactcaatggttgggttctttcatcTGATTGAGCCGTGCCAATATCgcatt 13
(((.(((((((((((..(((((((((.((.((((.(((((.....))))).)))).)).>>>>>>>>>-->>>>>>>>>>).)))
TGATTGAGCCGTGCCAATATC 12 miRNA
tgattgagccgtgccaatat 1
ptc-miR171f
gtgcttgaaagtgtcattgcgatgttggcccggttcactcagagaaaagacaccattttttttcaagaagatcatcaaagcttgaaagaataatggtggtcggtcgtctcTGATTGAGCCGTGCCAATATCttagtgctctttcatttat 13
(((..((((((.(.(((((.(((((((((.(((((((.(((((((...(((((((((((((((((((..(.....)....)))))))))).)))))).))).....))))>>>->>>>>>>->>>>>>>>>.)))))).))))))..)))
TGATTGAGCCGTGCCAATATC 12 miRNA
tgattgagccgtgccaatat 1
ptc-miR171l
ggagaagtagacacggtgtgatattggtccggctcatcttctgtgcataagcatctgaagttcttcactcatgaagaCGAGCCGAATCAATATCACTCttgtatgcttcttc 524
(((((((((.(((.((={{{{{{{{{{{={{{{{{==((((.((((....))))..)))).((((((....))))))->>>>>>->>>>>>>>>>>->)))).)))))))))
tgtgatattggtccggctcatc 216
tgtgatattggtccggctca 7
tgtgatattggtccggctcatct 2
tgtgatattggtccggctcat 20
gtgatattggtccggctcat 1
gtgatattggtccggctcatc 2
tgatattggtccggctcatct 6
tgatattggtccggctcatc 6
tgatattggtccggctca 1
acgagccgaatcaatatcac 1
CGAGCCGAATCAATATCACTC 256 miRNA
cgagccgaatcaatatcac 3
cgagccgaatcaatatca 1
gagccgaatcaatatcactc 2
ptc-miR171m
ggagaagcagacatggcgtggtattgatccggctcatcttctgtatttgcatcagaagttcttcgctgaagaCGAGCCGAATCAATATCACTCttgtacgcttcattc 343
((((((((..(((.((={{{{{{{{{{{={{{{{{==((((((.........)))))).(((((...)))))->>>>>>->>>>>>>>>>>->))))..))))).)))
cgtggtattgatccggctcat 5
cgtggtattgatccggctcatc 71
cgtggtattgatccggctcatct 1
cgtggtattgatccggctca 3
acgagccgaatcaatatcac 1
CGAGCCGAATCAATATCACTC 256 miRNA
cgagccgaatcaatatcac 3
cgagccgaatcaatatca 1
gagccgaatcaatatcactc 2
ptc-miR171n
ttggagaagcagacatggcgtggtattgatccggctcttcttctgtatttgcatcagaagtttttcgctgaagaCGAGCCGAATCAATATCACTCttgtacgcttcattctctaa 264
((((((((((..(((.((.(((((((((((.((((((.(((((.((....((.......)).....)).)))))->>>>>>->>>>>>>>>>>->))))..)))....)))))))
cgtggtattgatccggctcttc 1
acgagccgaatcaatatcac 1
CGAGCCGAATCAATATCACTC 256 miRNA
cgagccgaatcaatatcac 3
cgagccgaatcaatatca 1
gagccgaatcaatatcactc 2
ptc-miR172b
tcgttgtttgcgggtggagcatcatcaagattcacatgcaaatgcacggccggtgatgttaagagttaaatctttctttgtttctgttcatctgccaaagttctttggaagtgAGAATCTTGATGATGCTGCATcggcaataaacga 2600
(((((..((({={{{{={{{{{{{{{{{{{{((.(((.((((.((..(((.(((((.....((((.((((......)))).))))..))))).)))...))..))))...)))->>>>>>>>>>>>>>>>->>>).))))..)))))
tttgcgggtggagcatcatca 3
tgcgggtggagcatcatcaag 6
cgggtggagcatcatcaagat 1
ggagcatcatcaagattcacat 1
ggagcatcatcaagattcac 18
ggagcatcatcaagattcaca 14
agaatcttgatgatgctg 1
AGAATCTTGATGATGCTGCAT 2527 miRNA
agaatcttgatgatgctgca 24
gaatcttgatgatgctgcat 2
aatcttgatgatgctgcat 1
atcttgatgatgctgcat 1
tcttgatgatgctgcatcggc 1
ptc-miR172c
agtcattgtttgcaggtgcagcatcatcaagattcacattcaaacagatgtacggcagctagctagctagatagatagacagcaatgtatttctttgaaggtgAGAATCTTGATGATGCTGCATcagccataaatgact 2567
(((((((....((.((({{{{{{{{{{{{{{{{{{{{=(((((..(((.(((((...(((..(((.((....)).)))..)))..))))).)))))))).)))>-->>>>>>>>>>>>>>>>>>).))....)))))))
gcagcatcatcaagattcac 9
gcagcatcatcaagattcaca 2
agaatcttgatgatgctg 1
AGAATCTTGATGATGCTGCAT 2527 miRNA
agaatcttgatgatgctgca 24
gaatcttgatgatgctgcat 2
aatcttgatgatgctgcat 1
atcttgatgatgctgcat 1
ptc-miR172f
gtcgttgtttgcgggtgctgcatcaccaagattcacatgcaaatgcatggccgatgatatatgttagaaattttttttatataaaaaagatatctttctttctttctgatcatctgccaaagttctttggaagtgAGAATCTTGATGATGCTGCATcggcaataaacgac 2557
((((((..((((.(((((.((((((.((((((((.(((.((((.((.((((.((((((....(..(((((((((((((....)))))))))....))))..)......)))))).))))..))..))))...)))->>>>>>>>->>>>>>->>>>).))))..))))))
agaatcttgatgatgctg 1
AGAATCTTGATGATGCTGCAT 2527 miRNA
agaatcttgatgatgctgca 24
gaatcttgatgatgctgcat 2
aatcttgatgatgctgcat 1
atcttgatgatgctgcat 1
tcttgatgatgctgcatcggc 1
ptc-miR172g
agtcactgtttgcctatggagcatcatcaagattcacaagctttattagggctagtgtgtggtgatgatggtggcttttggtggtccctttttttcaatccaatagccctttgaattgGGAATCTTGATGATGCTGCAGcggcaataaatggct 77
(((((....(((((..({={{{{{{{{{{{{{{{{={{(..((((..(((((((.....((((((.((.((.((((......))))))...)).)))..))).))))))).)))))))->>>>>>>>>>>>>>>>->>-.)))))....)))))
ggagcatcatcaagattcac 18
ggagcatcatcaagattcaca 14
gggaatcttgatgatgctgca 11
ggaatcttgatgatgctgc 1
GGAATCTTGATGATGCTGCAG 31 miRNA
ggaatcttgatgatgctgca 2
ptc-miR172h
agtcactgtttgccgatggagcaccatcaagattcacaaactttattagggctaataagtggtgatgatggtggcttttggtggtcccttcgtttcaacccaatagccatttgaattgGGAATCTTGATGATGCTGCAGcggcaataaatggct 48
(((((....((((((.{{={{{{={{{{{{{{{{{={((..((((....(((((....((...(((((.((.((((......)))))).)))))...))....)))))...)))))))->>>>>>>>>>>->>>>->>-))))))....)))))
atggagcaccatcaagattcaca 1
tggagcaccatcaagattcac 1
ggagcaccatcaagattcaca 1
gggaatcttgatgatgctgca 11
ggaatcttgatgatgctgc 1
GGAATCTTGATGATGCTGCAG 31 miRNA
ggaatcttgatgatgctgca 2
ptc-miR319b
aagagagcttttttcggtccacttatagatagtaatatgatttaattagttaccgactcattcatccaaatactgagttatgagctaagattacccagtaaatgaatgagtgatgcgggagacaaattaaatcttaaacttcctatcaTTGGACTGAAGGGAGCTCCCtt 134
(((.(((((((((((((((((.(.((((..(((.....(((((((((.(((.(((..((((((((.((..(((((.((.((........)).)).)))))..)).))))))))..)))..))).)))))))))....)))..)))).)->>>>>>>>>>>>>>>>>->))
ttggactgaagggagctccct 21
TTGGACTGAAGGGAGCTCCC 90 miRNA
ttggactgaagggagctccctt 2
ttggactgaagggagctcc 6
ttggactgaagggagctc 6
tggactgaagggagctccctt 4
tggactgaagggagctccct 2
tggactgaagggagctccc 3
ptc-miR319c
tcatgagaaatggtttaagagagctttcttcagtccactcatggacgggcgaagggtttggattagctgccgactcattcattcaaacacagtagaaattaagggagcagtatggctgctattgtgaatgtgtgaatgatgcgggagataaatttcatccttttcttctctgtgcTTGGACTGAAGGGAGCTCCCtttaatcgtttattcacga 195
((.((((((((((((.(((.{{{{{=={{{{{{{{{{=={(((((..((.(((((((..(((((..((.(((..((((((((.((..((((((............(((((.....)))))))))))..)).))))))))..))).))...))))).))))))).))..)))))).->>>>>>>>>>-->>>>>->)).)))))))).)))).))
taagagagctttcttcagtcca 1
gagctttcttcagtccactc 1
agctgccgactcattcattca 9
agctgccgactcattcattc 1
agctgccgactcattcatt 2
tgtgaatgatgcgggagata 3
tgtgaatgatgcgggagat 1
tgtgaatgatgcgggaga 2
tgtgaatgatgcgggagataa 23
tctctgtgcttggactgaag 1
tgtgcttggactgaagggagc 2
tgcttggactgaagggagctc 1
cttggactgaagggagctccc 9
cttggactgaagggagctcc 3
cttggactgaagggagct 1
ttggactgaagggagctccct 21
ttggactgaagggagctcccttt 1
TTGGACTGAAGGGAGCTCCC 90 miRNA
ttggactgaagggagctccctt 2
ttggactgaagggagctcc 6
ttggactgaagggagctc 6
tggactgaagggagctccctt 4
tggactgaagggagctccct 2
tggactgaagggagctccc 3
ptc-miR390a
ttgtacacacaagtacgggagaatctgttAAGCTCAGGAGGGATAGCGCCatgagcatgacaaagtctatgtttgagttaatctcaacaaaatcaatccagtcatcagtggcgctatctatcctgagttctatgggttctccttactattctggtgcag 743
((((((.....((((.((((((((((((.-<<<<<<<<<-<<<<<<<<<<((..(.(((((........((((.(((.....)))))))...........))))))=}}}}}}}}}}}}=}}}}}}}))..))))))))))))))))......))))))
agaatctgttaagctcaggagg 1
taagctcaggagggatagcgcc 14
taagctcaggagggatagcgc 74
aagctcaggagggatagcgcca 3
AAGCTCAGGAGGGATAGCGCC 524 miRNA
aagctcaggagggatagc 1
aagctcaggagggatagcgc 16
aagctcaggagggatagcg 2
agctcaggagggatagcgcc 15
tcaggagggatagcgccatga 1
caggagggatagcgccatga 4
caggagggatagcgccatgag 46
caggagggatagcgccatgagc 9
agtggcgctatctatcctgag 19
cgctatctatcctgagttcta 10
cgctatctatcctgagttct 3
gctatctatcctgagttct 1
ptc-miR390b
agtatggaagaatctgttAAGCTCAGGAGGGATAGCGCCctaaggataatcatgggctctttttatgtggtttttgattctcagtggcgctatccatcctgagtttcattgcttcttcttgct 652
((((.(((((((.(.((.<<<<<<<<<<-<<<<<<<<<<((.((((...(((..(((((.......).))))..))))))).)).))}}}}}}}}=}}}}}}}}}}=}).).)))))))))))
agaatctgttaagctcaggagg 1
taagctcaggagggatagcgcc 14
taagctcaggagggatagcgc 74
AAGCTCAGGAGGGATAGCGCC 524 miRNA
aagctcaggagggatagc 1
aagctcaggagggatagcgc 16
aagctcaggagggatagcg 2
aagctcaggagggatagcgccc 2
agctcaggagggatagcgcc 15
cgctatccatcctgagtttca 3
ptc-miR390c
gatatgtgcataagtatgggaggatctgttAAGCTCAGGAGGGATAGCGCCatgagctgatgataagttgatgtttgatgggttaatctcaacataatcaatctagtcattagtggcgctatctatcctgagttctataggttctccttgctattccggtacagtttc 742
((..(((((...((((.((((((((((((.-<<<<<<<<<-<<<<<<<<<<....(((((((((.(((((((...((.((((.....)))).))..))))).)).))))))}}}}}}}}}}}}}=}}}}}}}))..))))))))))))))))......)))))...))
taagctcaggagggatagcgcc 14
taagctcaggagggatagcgc 74
aagctcaggagggatagcgcca 3
AAGCTCAGGAGGGATAGCGCC 524 miRNA
aagctcaggagggatagc 1
aagctcaggagggatagcgc 16
aagctcaggagggatagcg 2
agctcaggagggatagcgcc 15
tcaggagggatagcgccatga 1
caggagggatagcgccatga 4
caggagggatagcgccatgag 46
caggagggatagcgccatgagc 9
agtggcgctatctatcctgag 19
cgctatctatcctgagttcta 10
cgctatctatcctgagttct 3
gctatctatcctgagttct 1
ptc-miR390d
ttgatatatagaagtatggaagaatctgttAAGCTCAGGAGGGATAGCGCCctaaggataaccatgggctctttttatttggtttttgactatcagtggcgctatccatcctgagttttactggttcttcttgctacgatcag 649
(((((.....(.((((.(((((((((.((.<<<<<<<<<<-<<<<<<<<<<((...((((..((..((((..........))))..))..)))))).)))))))))).)))))))))).)).))))))))))))).).)))))
agaatctgttaagctcaggagg 1
taagctcaggagggatagcgcc 14
taagctcaggagggatagcgc 74
AAGCTCAGGAGGGATAGCGCC 524 miRNA
aagctcaggagggatagc 1
aagctcaggagggatagcgc 16
aagctcaggagggatagcg 2
aagctcaggagggatagcgccc 2
agctcaggagggatagcgcc 15
ptc-miR393c
tagtgcagctggagtgtTCCAAAGGGATCGCATTGATCtaatgactctcgatgtctaaatcatattaatgtttagttttttcgttggatcatgcgatcccttaggaattttccagcattcagctcta 61
(((.((.(((((((.((<<<-<<<<<<<<<<<<-<<<<((((((.....((...(((((.(((....))))))))...)))))))))))))))))))))))).))))).))))))).....)).)))
tccaaagggatcgcattgat 12
TCCAAAGGGATCGCATTGATC 41 miRNA
tccaaagggatcgcattgatct 7
caaagggatcgcattgatct 1
ptc-miR394b
tcatgtggatttagcaaagggtttcttacagagtttaTTGGCATTCTGTCCACCTCCtatctttagaaattagaatatctctttcatatggaggtgggcatactgccaaccgagctctgttggtctctctttgtaaaaccctcgtga 930
(((((.((.(((.((((((((...((.(((((((((.<<<<<<-<-<<<<<<<<<<<.......(((.((......)).))).......))))))))))).).))))))..))))))))).))...)))))))).))).)).)))))
aagggtttcttacagagttta 4
tttattggcattctgtccacc 4
TTGGCATTCTGTCCACCTCC 903 miRNA
ttggcattctgtccacct 1
ttggcattctgtccacctcct 2
ttggcattctgtccacctc 4
tggcattctgtccacctcc 1
ggcattctgtccacctcc 6
agctctgttggtctctctt 2
agctctgttggtctctctttg 2
ttggtctctctttgtaaaacc 1
ptc-miR395b
tgcaatggtgcatagatcaagtgtcccctagagttcccttgagcacttcactgggacccttcagaccgaaagagtattatctttcccaCTGAAGTGTTTGGGGGAACTCctggtgtcatttgatgttaataattagttaattgca 24
((((((...((..(.((((((((.(.((..(((((((((..(((((((((.(((((........(((....).))........)))))->>>>>>>>>-->>>>>>>>>..)).).)))))))).).........))..))))))
CTGAAGTGTTTGGGGGAACTC 22 miRNA
tgaagtgtttgggggaactc 2
ptc-miR395c
tagcatagatcaagtgtcccctagagttcctctgagcacttcattgggaatcttcgattaaatgaaagagtattatcattcctaCTGAAGTGTTTGGGGGAACTCctggtgtcatttgatgtta 24
(((((....(((((((.(.((..(((((((((..(((((((((.((((((..((((......)))).((......)).))))))->>>>>>>>>-->>>>>>>>>..)).).))))))))))))
CTGAAGTGTTTGGGGGAACTC 22 miRNA
tgaagtgtttgggggaactc 2
ptc-miR395d
agcatgccatagatcaagtgtcccctagagttcctctgagcacttcactgggaatttccgatcaaatgaaagagtattatcattcctaCTGAAGTGTTTGGGGGAACTCctggtgtcatttgatgtttacaagct 24
(((.((....(.((((((((.(.((..(((((((((..(((((((((.(((((((......((........))........)))))))->>>>>>>>>-->>>>>>>>>..)).).)))))))).)...)).)))
CTGAAGTGTTTGGGGGAACTC 22 miRNA
tgaagtgtttgggggaactc 2
ptc-miR395e
gaaacgcaaagaacgttagctgtcccccggagtttccctgaccacttcactggggctataattctactcttcgtgtttaagggtagaggcaacccttcctcaCTGAAGTGTTTGGGGGAACTCtgggtggcatttaacactgtttagctgtc 24
((...(((((.(..(((((.((((.(((((((((((((..(.(((((((.(((((......((((((((((.......)))))))))).........)))))->>>>>>>->-->>>>>>>>>)))).)))).)))))..).))).))..))
CTGAAGTGTTTGGGGGAACTC 22 miRNA
tgaagtgtttgggggaactc 2
ptc-miR395g
atcaagtgtcccctagagttcctctgagcacttcattggggatcttccatcgacctgaaagagtattatcattcctaCTGAAGTGTTTGGGGGAACTCctggtgtcatttgat 24
((((((((.(.((..(((((((((..(((((((((.((((((((((.((......)).)))).........))))))->>>>>>>>>-->>>>>>>>>..)).).))))))))
CTGAAGTGTTTGGGGGAACTC 22 miRNA
tgaagtgtttgggggaactc 2
ptc-miR395h
atcaagtgtcccctagagttcctctgagcacttcattggggatcttccatcgacctgaaagagtattatcattcctaCTGAAGTGTTTGGGGGAACTCctggtgtcatttgat 24
((((((((.(.((..(((((((((..(((((((((.((((((((((.((......)).)))).........))))))->>>>>>>>>-->>>>>>>>>..)).).))))))))
CTGAAGTGTTTGGGGGAACTC 22 miRNA
tgaagtgtttgggggaactc 2
ptc-miR395i
ttattttttgttttcgttaattgttgatagcacagatcaagtgtcccctagagttcctctgagcacttcaatggggatcttccatcgacctgaaagagtattatcattcctaCTGAAGTGTTTGGGGGAACTCctggtgtcatttgatgttacaagctcagaaaacacagtaa 24
(((((...(((((((.......(((..(((((....(((((((.(.((..(((((((((..(((((((((.((((((((((.((......)).)))).........))))))->>>>>>>>>-->>>>>>>>>..)).).))))))))))))..)))...))))))).)))))
CTGAAGTGTTTGGGGGAACTC 22 miRNA
tgaagtgtttgggggaactc 2
ptc-miR396a
tcttggtattcTTCCACAGCTTTCTTGAACTGcacctatttgaatattgttgttgatgttgccgtgcatgtacatatgacattgtatttttgttgcggttcaataaagctgtgggaagatacaaacagga 10339
(((((((((..<<<<<<<<<<<<-<<<<<<<<((...((..((((((...((((((((((((...)))...)))).)))))..))))))..))))}}}}}}}}=}}}}}}}}}}}}..))))...)))))
ttcttccacagctttcttgaac 1
cttccacagctttcttgaactg 3
ttccacagctttcttgaact 70
ttccacagctttcttgaac 638
TTCCACAGCTTTCTTGAACTG 8854 miRNA
ttccacagctttcttgaactgca 7
ttccacagctttcttgaa 61
ttccacagctttcttgaactgc 9
tccacagctttcttgaactgc 2
tccacagctttcttgaactg 12
ccacagctttcttgaactg 2
ccacagctttcttgaactgc 1
ccacagctttcttgaactgca 315
cacagctttcttgaactgca 4
cacagctttcttgaactg 29
tgaatattgttgttgatgttg 1
cggttcaataaagctgtggga 14
ggttcaataaagctgtgggaa 1
ggttcaataaagctgtgggaag 1
gttcaataaagctgtgggaag 119
gttcaataaagctgtggga 1
ttcaataaagctgtgggaag 110
ttcaataaagctgtgggaagat 2
ttcaataaagctgtgggaa 1
ttcaataaagctgtgggaaga 42
tcaataaagctgtgggaagat 1
tcaataaagctgtgggaagata 6
tcaataaagctgtgggaaga 12
tcaataaagctgtgggaagataca 1
aataaagctgtgggaagatac 1
taaagctgtgggaagatacaaa 6
tgtgggaagatacaaacagga 12
ptc-miR396f
gcacggcttgtagatatatatgggtctcttggtgatTTTCCACGGCTTTCTTGAACTgtatatattatcaatggctttttacaagactggaagatggtttccatggagaagaattgtcacaaaaacagttcaagaaagccctgaaaaattatttagaggatctagtttatatatgtctatacaatggctggc 57
((.((((((((((((((((((((((((((..(((((<<<-<<-<<<<<<<<<<<<<<((.........((((..((((((.((....((((((....)))))))))))))).))))........)))))))))))))))).)).))))))))..))).))))).....)))))))))))))....)))))))
ttttccacggctttcttgaac 1
TTTCCACGGCTTTCTTGAACT 25 miRNA
tttccacggctttcttgaac 7
ttccacggctttcttgaactg 9
ttccacggctttcttgaac 7
ttccacggctttcttgaa 4
ttccacggctttcttgaact 4
ptc-miR396g
gagaagaaactaaggtcgttgcatgcttTTCCACGGCTTTCTTGAACTTggcactcaagagacatgagagtaaagggctaggctttcttttctattcctttcgttctttgaaattttcctgttcaaagaatccatacatatcagtctctttagtacaaagctcaagaaagccgtgggaaaatatgaaaggattttgtggtgtaatctt 185
((((....((((.((((.((.((((.((<<<<<<<<<<<<<<<<<-<<<.(.(((.(((((((.(((....(((((..((((........))))..))))).((((((((((.........)))))))))).........)))))))))).))).).}}}=}}}}}}}}}}}}}}}}})).)))).)).))))...))))....))))
ttttccacggctttcttgaac 1
tttccacggctttcttgaactt 4
tttccacggctttcttgaact 25
tttccacggctttcttgaac 7
TTCCACGGCTTTCTTGAACTT 114 miRNA
ttccacggctttcttgaac 7
ttccacggctttcttgaa 4
ttccacggctttcttgaact 4
ccacggctttcttgaacttgg 4
cacggctttcttgaactt 2
aagctcaagaaagccgtggga 1
ctcaagaaagccgtgggaaa 8
ctcaagaaagccgtgggaaaa 4
ptc-miR397a
gtggaggcttcctggattggagaaccaTCATTGAGTGCAGCGTTGATGaaatcctccattttgtgctattaaactgttaccaaccctttatggggcatggcatcatttcaccagcgctgcattcaatcatgtttttctaactcttccgggcatggttttgc 294
(..(((.(..((((((((((((((.((<-<<<<<<<<<<<<<<<<-<<((((...((((...((........)).........(((.....)))..))))....))}}}}=}}}}}}}}}}}}}}}}.))).))))))))....))))))...).)))..)
tcattgagtgcagcgttgatga 1
tcattgagtgcagcgttgatgaa 1
tcattgagtgcagcgttgat 2
tcattgagtgcagcgttga 4
TCATTGAGTGCAGCGTTGATG 283 miRNA
attgagtgcagcgttgatg 2
ttcaccagcgctgcattcaat 1
ptc-miR403a
ggaagaggcatatttcaggtttgtgcatgaatctaatatagctaaaaaaatcccatcaaacacaaattaaaatactagatagcaatcagcactagtttagtatagtaTTAGATTCACGCACAAACTCGtaatctgtctttttc 178
((((((((((.(((.(..((((((((.((((((((((((.(((((............................(((((...((.....)).))))))))))...)))>>>>>>>>>->>>>>>>>-->.))).))))))))))
tttgtgcatgaatctaatata 1
ttagattcacgcacaaactc 1
ttagattcacgcacaaactcgt 10
ttagattcacgcacaaact 6
ttagattcacgcacaaac 21
TTAGATTCACGCACAAACTCG 139 miRNA
ptc-miR403a
ggaagaggcatatttcaggtttgtgcatgaatctaatatagctaaaaaaatcccatcaaacacaaattaaaatactagatagcaatcagcactagtttagtatagtaTTAGATTCACGCACAAACTCGtaatctgtctttttc 178
((((((((((.(((.(..((((((((.((((((((((((.(((((............................(((((...((.....)).))))))))))...)))>>>>>>>>>->>>>>>>>-->.))).))))))))))
tttgtgcatgaatctaatata 1
ttagattcacgcacaaactc 1
ttagattcacgcacaaactcgt 10
ttagattcacgcacaaact 6
ttagattcacgcacaaac 21
TTAGATTCACGCACAAACTCG 139 miRNA
ptc-miR403b
agaggactcatatctctagtttgttcgtggatctgacgccatcacaaccgttcatttcacgaccatccaatggcgTTAGATTCACGCACAAACTCGcgatctgtctcctct 172
((((((..((.(((.(.(((((((.(((((((((((((((((......(((.......)))........))))))>>>>>>>>>>>->>>>>>>->.))).))..))))))
tttgttcgtggatctgacgcc 3
ttgttcgtggatctgacgcca 1
ttagattcacgcacaaactc 1
ttagattcacgcacaaactcgc 1
ttagattcacgcacaaact 6
ttagattcacgcacaaac 21
TTAGATTCACGCACAAACTCG 139 miRNA
ptc-miR472a
agttaacacatatgggaggaatggagagggagtaggattttcggaaggttatcgggtgggtgagcggggaagataactttggtttttgagatagtacttgttaTTTTCCCTACTCCACCCATCCCataggtttccgatcattcctccctctcctcatcactctgcttctcatggcctgtttatct 41
((..((((..(((((((((...((((((((((..((((..(((((((.((((.(((((((((((..(((((((((((...(((.((......)).))).))))>>>>>>>-->>->>>>>>>>>-)))).)))))))..))))))))))))))...........)))))))))...))))...))
gagagggagtaggattttcggaa 1
gagggagtaggattttcggaa 1
gggagtaggattttcggaaggtt 1
agtaggattttcggaaggttatcg 5
agtaggattttcggaaggttat 3
gtaggattttcggaaggttat 1
tatcgggtgggtgagcgggga 1
ggtgggtgagcggggaagata 1
tgggtgagcggggaagataac 3
tgggtgagcggggaagataa 2
taactttggtttttgagatagta 1
attttccctactccacccatc 1
TTTTCCCTACTCCACCCATCCC 19 miRNA
tttccctactccacccatccc 1
ptc-miR472b
gcagacagccgccttgaagttgatgttggatgggaggaaatggagagggagtagggttttcggaaggttactggatgggtgagtggggaagataactaagctctgtttgttaTTTTCCCAACTCCACCCATCCCataggtttccgatcattcctccctctcctcatcacctcacctctgctcctctctctttacaagtatgcttggtttgc 42
(((((((((...(((((((..((.(..(((.((((((....((((((((((..((((..(((((((.(((=={{{{{{{{{{{{={{{{{{{((((.((((...))))))))>>>>>>>->>>->>>>>>>>>-.))).)))))))..))))))))))))))......)))).)))))...).))...)))..))))...)))..))))))
agagggagtagggttttcggaag 1
ctggatgggtgagtggggaaga 1
ctggatgggtgagtggggaa 1
tggatgggtgagtggggaagataa 1
gatgggtgagtggggaagata 1
atgggtgagtggggaagataa 4
atgggtgagtggggaagata 3
tgggtgagtggggaagataac 5
tgggtgagtggggaagataacta 4
tgggtgagtggggaagataactaa 1
agtggggaagataactaagctc 1
TTTTCCCAACTCCACCCATCCC 17 miRNA
ttttcccaactccacccatcc 1
ttcccaactccacccatcccat 1
ptc-miRX1
tgaaatccaagtggacttcccttacaatctactctttcagtttcacagaagatccagattagattttaaggcaaacaaattgaTAGAGCAGATTGTAAGGGAAGcccacatggatttca 3643
(((((((((.((((.(((((((((((((((.((((.(((((((..(..((((((.......))))))..)......)))))))->>>>->>>>>>>>>>>>>>>.)))).)))))))))
caagtggacttcccttacaat 1
aagtggacttcccttacaa 4
aagtggacttcccttacaatc 1
aagtggacttcccttacaatct 2
agtggacttcccttacaatct 13
tggacttcccttacaatctac 1
aaacaaattgatagagcagat 1
ttgatagagcagattgtaagg 1
tgatagagcagattgtaaggg 23
tgatagagcagattgtaagggaag 1
atagagcagattgtaagggaa 1
atagagcagattgtaaggga 1
TAGAGCAGATTGTAAGGGAAG 3427 miRNA
tagagcagattgtaagggaa 16
agagcagattgtaagggaag 1
gagcagattgtaagggaa 1
gagcagattgtaagggaag 4
agcagattgtaagggaag 1
agcagattgtaagggaagccc 1
gcagattgtaagggaagc 1
gcagattgtaagggaagccca 25
cagattgtaagggaagccca 6
ttgtaagggaagcccacatg 9
ttgtaagggaagcccacat 6
ttgtaagggaagcccacatgg 94
tgtaagggaagcccacatgg 1
ptc-miRX108
ccgagttacagcatcAAGCGCCTGTAGCTCAGTGGatagagcgtctgtttcctaagcagaaagtcgtaggttcgacccctacctggcgcgtgagtatcttcttttgtctagttgggcttcatgctttgctgaaacctgg 25
(((.(((.(((((..<<<<<--<<-<<<<<<<<<<((((((..((((((.....)))))).....(((((.......)))))..(..((....))..)...))))))))).))))))).)))))))))))).))).)))
aagcgcctgtagctcagtgga 6
AAGCGCCTGTAGCTCAGTGG 8 miRNA
agcgcctgtagctcagtgga 1
agcgcctgtagctcagtggataga 1
cctaagcagaaagtcgtaggt 1
ctaagcagaaagtcgtagg 1
ctaagcagaaagtcgtaggttc 2
ctaagcagaaagtcgtaggtt 1
agcagaaagtcgtaggttc 1
agcagaaagtcgtaggttcg 1
gcagaaagtcgtaggttc 1
aagtcgtaggttcgaccccta 1
ptc-miRX111
tgcagagtagaagtcgagctcaagcacaaattcgatcttgcttaacaaggtaccggcaaagtcagaTCGAATTTGGGCTTGAGATTGtcttcttcgttgca 745
(((((...(((((.(({={{{{{{{={{{{{{{{{{{(.((((.....(....)....)))).)))>>>>>>>>>->>>>>>>->>>.)))))...)))))
tgcagagtagaagtcgagct 1
agctcaagcacaaattcgatc 37
gctcaagcacaaattcgatc 1
tcgaatttgggcttgagatt 21
tcgaatttgggcttgagat 9
tcgaatttgggcttgagattgt 27
tcgaatttgggcttgaga 1
TCGAATTTGGGCTTGAGATTG 638 miRNA
gaatttgggcttgagattg 2
tttgggcttgagattgtcttc 8
ptc-miRX112
gatatctcattcatatatcatttattccagcattcttgattgaatgccacatatcattcattcctgctttttatatgaaaagtcggaatgaaTGATATGTGGCATTCAATCGAgaatgctggaataaatgatatctgaacaattgatc 40
(((......((((.((((((((((((((((((((((((((((((((((((((((((((((((((.(((((((....))))))).))))))))>>>>>>>>>>>>>>>>>>>>>))))))))))))))))))))).))))......)))
atgatatgtggcattcaatcg 2
tgatatgtggcattcaat 2
TGATATGTGGCATTCAATCGA 34 miRNA
tgatatgtggcattcaatcg 2
ptc-miRX113
agttattcttagagagttttttagactcaagttctgatccatgtactggctagttggttttccttttgaaaacTAGCTAGCAAGTTCATGGATCggaactctcagtctgaaaaaactgatgagct 15
((((....((((....(((((((((((..(((((((({{{{{{={{{={{{{{{{{{{((((.....))))))>>>>>>>>->>>->>>>>>>>))))))...))))))))))).))))..))))
ttctgatccatgtactggcta 4
ttctgatccatgtactggc 1
tccatgtactggctagttggt 4
ccatgtactggctagttggtt 1
TAGCTAGCAAGTTCATGGATC 5 miRNA
ptc-miRX119
cattgtaggacattcgtcggcaaccatttagtcatgtttgctaacatgaccgtccaagttatcaattatgtcaggttacattaaggaagctggcatgagcatgccatcaaagttgttgacatgtttgtcatctTGGATGATCATGTTGGCAACCatgttgatgtggtagatcatgtgctgcgtatg 21
((((((((.((((..(((....(((((((((.(({{={{{{{{{{{{{{={{{{{(((....(((.(((((((....(((.....((...((((((....)))))))).....)))))))))).)))....))>>>>>>->>>>>>>>>>>>->))))))).))))).))).)))).))))).)))
tgtttgctaacatgaccgtcc 1
tcatcttggatgatcatgttggca 1
tcttggatgatcatgttggca 3
cttggatgatcatgttggcaa 3
TGGATGATCATGTTGGCAACC 12 miRNA
gatgatcatgttggcaacca 1
ptc-miRX12
ggacccatgcatggcgaacaagttgagctgtagggttatgatgaacatgctaattacaagctattgtcttccatggaataggcagtgatggcatttgttttattttcctgaggtggagaaaaacaaatagaccataacactgttatTCCATGGAAGATAATGACTCGtggttgacacttgatctctccagtccagttcagattcaagctagctgctgtct 70
((((....((.((((.......((((((((...((....(((.((..((.(((((((.((.((((((((((((((((((((.(((((((((((((((((((..(((((......)))))))))))))).).))))..)))))))))>>>>>>>>>>>>>>>>->>->)))))).)).)).)))...))....))))))))......))))))....))))
ttgtcttccatggaataggca 12
ttgtcttccatggaataggcag 12
ttgtcttccatggaataggc 1
tccatggaagataatgac 2
tccatggaagataatgactc 1
TCCATGGAAGATAATGACTCG 42 miRNA
ptc-miRX123
ggtgcatatatatacatgaatgtgcctcatgTCTGGTATGAGCATTTGATGAttgataatttcaatttgtttacatcttttttctgcaatcctaataccgcgtactttcaaatgtaaagaaattgaaattatcaatcatcaaatgttcgtaccatacgtaaggcacactcgtatgtataattgtatt 166
((((((..((((((.((((.(((((((.(((<-<<<<<<<<<<<<<<<<<<<((((((((((((((((.(((((((........(((............))).........))))))).))))))))))))))))))))))))))))))))))).)))).))))))).)))).))))))..))))))
catgtctggtatgagcatttg 1
tctggtatgagcatttga 1
tctggtatgagcatttgatg 2
tctggtatgagcatttgatgat 1
TCTGGTATGAGCATTTGATGA 154 miRNA
ctggtatgagcatttgatgat 1
tggtatgagcatttgatga 2
ttatcaatcatcaaatgttcg 3
tatcaatcatcaaatgttcgt 1
ptc-miRX128
cttggttactgatattattttgaaccgtcatgtcaattattggttatatatcgactgaaaatgaaagctatttcactattctgtgcacacaatgcttgaaacattaatcatggtttttgaaagtattggagcaTTGTACACAGAATAGGTGAAATaactttcattttcattcgatacgcaactaaaattgtaaatatagttcagtctcatcttggaagccaag 133
(((((((.(..(.......((((((..(.....(((((.((((((.(.((((((.((((((((((((.(((((((((((((((((...(((((((((.((((.....(((.......)))..)).)).)))))>>>>->>>>>>>>>->>>>>>>).)))))))))))).)))))).).))))))))))).....)..)))))).......)..).)))))))
tcgactgaaaatgaaagctat 16
tcgactgaaaatgaaagcta 2
cgactgaaaatgaaagctat 1
gactgaaaatgaaagctat 1
aaagctatttcactattctgt 1
aagtattggagcattgtacac 1
ttgtacacagaataggtgaaata 1
TTGTACACAGAATAGGTGAAAT 109 miRNA
cagaataggtgaaataactttc 1
ptc-miRX13
ggactcatgcatggcgaacaagttgagctgtagggttatgatgaacatgctaattacaagctattgtcttccatggaataggcagtgatggcatttgttttattttcctgaggtggagaaaaacaaggagaccataacactgttatTCCATGGAAGATAATGACTCGtggttgacacttgatctctccagtccagttcagattcaagctagctgctgtct 70
((((....((.((((.......((((((((...((....(((.((..((.(((((((.((.((((((((((((((((((((.((((((((((.((((((((..(((((......)))))))))))))..).))))..)))))))))>>>>>>>>>>>>>>>>->>->)))))).)).)).)))...))....))))))))......))))))....))))
ttgtcttccatggaataggca 12
ttgtcttccatggaataggcag 12
ttgtcttccatggaataggc 1
tccatggaagataatgac 2
tccatggaagataatgactc 1
TCCATGGAAGATAATGACTCG 42 miRNA
ptc-miRX14
ggactcatgcatggcgaacaagttgagctgtagggttatgatgaacatgctaattacaagctattgtcttccatggaataggcagtgatggcatttgttttattttcctgaggtggagaaaaacaaggagaccataacactgttatTCCATGGAAGATAATGACTCGtggttgacacttgatctctccagtccagttcagattcaagctagctgctgtct 70
((((....((.((((.......((((((((...((....(((.((..((.(((((((.((.((((((((((((((((((((.((((((((((.((((((((..(((((......)))))))))))))..).))))..)))))))))>>>>>>>>>>>>>>>>->>->)))))).)).)).)))...))....))))))))......))))))....))))
ttgtcttccatggaataggca 12
ttgtcttccatggaataggcag 12
ttgtcttccatggaataggc 1
tccatggaagataatgac 2
tccatggaagataatgactc 1
TCCATGGAAGATAATGACTCG 42 miRNA
ptc-miRX143
atcttttagcattttccaagcaaattgaatttgtatcTTTGGGATCATCAGGACAGCCcctgcatcgagaattatgcagaactctactgaaatgaaacggggaaaaaaaaattatttcaacctttgccacaactgacgcaggggctgccccgataattccaaagatccagtgcaatctgcttgttaaattgctactggat 30
((((..((((((((..((((((.((((...(((.(((<<<<<<<<-<<<-<<-<<<<<(((((.((.((......(((((.......((((((((................))))))))...))))).....)))).)))))))))).)).))).))))))))))).)))..)))).))))))..))).)))))..))))
TTTGGGATCATCAGGACAGCC 30 miRNA
ptc-miRX146
gaaacaacaacgaGTTGAGATGGCCGAGTTGGTCtaaggcgccagattaaggttctggtccgaaagggcgtgggttcaaatcccactctcaacaaatccaatttttttaatattatacttgcaagtcttagcccttatgttcagtttc 138
(((((((((..(.<<<<<<<<---<<<<<<<<<-...((.((((((.......))))))))....(((.(((((.......))))).))).....................)))).)))))...)))))))).)...))))..)))))
gttgagatggccgagttggt 33
gttgagatggccgagttgg 6
gttgagatggccgagttg 23
gttgagatggccgagttggtcta 29
gttgagatggccgagttggtctaa 2
GTTGAGATGGCCGAGTTGGTC 45 miRNA
ptc-miRX149
gaaagcccctatttcaTGTTCAGATCAGTAGATAGCAtgtagtttgcttgtggtaatggtaccttgatcagactacttgctatctacggatctgcacaggttttt 122
(((((((.........<<<-<<<<<<-<<<<<<<<<<.((((((((.(((.((((....)))).))).)))))))).))}}}}}}}}=}}}}}}=}}}}})))))
TGTTCAGATCAGTAGATAGCA 99 miRNA
ttcagatcagtagatagcatgtag 1
ttcagatcagtagatagcatg 16
ctatctacggatctgcacagg 6
ptc-miRX15
ggactcatgcatggcgaacaagttgagctgtagggttatgatgaacatgctaattacaagctattgtcttccatggaataggcagtgatggcatttgttttattttcctgaggtggagaaaaacaaggagaccataacactgttatTCCATGGAAGATAATGACTCGtggttgacacttgatctctccagtccagttcagattcaagctagctgctgtct 70
((((....((.((((.......((((((((...((....(((.((..((.(((((((.((.((((((((((((((((((((.((((((((((.((((((((..(((((......)))))))))))))..).))))..)))))))))>>>>>>>>>>>>>>>>->>->)))))).)).)).)))...))....))))))))......))))))....))))
ttgtcttccatggaataggca 12
ttgtcttccatggaataggcag 12
ttgtcttccatggaataggc 1
tccatggaagataatgac 2
tccatggaagataatgactc 1
TCCATGGAAGATAATGACTCG 42 miRNA
ptc-miRX152
ctttcatagtcataacatcctgatcAATGGCCATTGTAAGAGTAGAaggatccatgaagcaaaacattgactcctgatattccactcttacagagtccattgattaagatgttataacattgttctgaaag 109
((((((..((.((((((((.(((((<<<<<-<-<<<<<<<<<<-<<((((((.(((........))).)).)))).....)).)))))))))).).)))))))))).)))))))).)).......))))))
cataacatcctgatcaatggc 6
catcctgatcaatggccatt 1
tgatcaatggccattgtaaga 2
tcaatggccattgtaagagt 1
tcaatggccattgtaagagta 20
tcaatggccattgtaagag 1
caatggccattgtaagagta 1
caatggccattgtaagagtag 8
caatggccattgtaagagtaga 11
AATGGCCATTGTAAGAGTAGA 32 miRNA
aatggccattgtaagagtagaa 15
ttgtaagagtagaaggatccatg 1
ttgtaagagtagaaggatccat 1
ttacagagtccattgattaag 9
ptc-miRX153
tggagatgcggaTCAGTGGAGATGAAACATGAttgctacagcattgctaagtgtttaaagatgaactgtgtggttatttccttggtgaatgtattttta 23
((((((((((.(<<<<-<<<<<<<<-<<<<--((.((..((((((....))))))...))...))..))))..)))))))))))))...))))))))))
atcagtggagatgaaacatga 1
TCAGTGGAGATGAAACATGA 8 miRNA
tcagtggagatgaaacatgat 1
tcagtggagatgaaacatg 2
cagtggagatgaaacatg 1
cagtggagatgaaacatga 3
agtggagatgaaacatga 7
ptc-miRX154
ccctttcttcttcttcgttgtctactgagTGAACAGTAGACGTGAATTATagttaacgtcctactattcacacatgggcgtgaattataattcacgttcactgttcatgcagtgaatattggg 14
(((...............(((.(((((.(<<<<<<<<--<<<<<<<<<<<((((.((((((..............)))))).)))))))))))))))..))))))))).))))).)))..)))
tgagtgaacagtagacgtga 1
tgagtgaacagtagacgtgaa 1
TGAACAGTAGACGTGAATTAT 11 miRNA
tgaacagtagacgtgaattata 1
ptc-miRX156
ctgagaattggactcatgcatggcgaacaagttgagctgtagggttatgatgaacatgctaattacaagccaTTGTCTTCCATGGAATAGGCAgtgatggcatttgttttattttcctgagttggagaaaaacaaatagaccataacactgttattccttggaagataatgactcgtggttgacacttgatctctccagtccagttcagattcaagctagctgctgtctgtaaattctttg 25
(.(((((((((((....((.((((.......((((((((...((....(((.((..((.(((((((.((.((<<<<<<<<<<-<<<<<<<-<<(((((((((((((((((..(((((......)))))))))))))).).))))..)))))))))))).)))))))))))).)).))))))).)).)).)))...))....))))))))......))))))....))))...))))))).)
TTGTCTTCCATGGAATAGGCA 12 miRNA
ttgtcttccatggaataggcag 12
ttgtcttccatggaataggc 1
ptc-miRX160
ttagttaagcgtgggcttttctctgcaaaatttgcaactcaaagtttcctccagtcgttggattATCAATGAGAATACTACTGCAaaaaatagtccaagagtttataataccaactatgaaaaatcaaaacagcaatcttttgcaggagtattctcattgagaatccaacaattagagaaagctttgacacaagttttgcaagaaaaaaggaaagtctcatgtctcaactaa 14
((((((.(((((((((((((((((((((((((((....(((((((((.(((.(((.((((((((-<<<<<<<<<<<<<<-<<<<<(((.((.((....((.((((((........))))))...))......)).))=}}}}}}}}=}}}}}}}}}}}))).)))))))).))).))).)))))))))..)))))))))).))).....)))))))).)))).)).))))))
ttcctccagtcgttggattat 1
tcgttggattatcaatgagaa 1
tggattatcaatgagaatact 3
ATCAATGAGAATACTACTGCA 7 miRNA
aatgagaatactactgca 1
cttttgcaggagtattctcat 1
ptc-miRX161
ctcgcaacctctgtctcggaacaatagttcaatcttttcagcaaccttaaatagtgggctatttaaggTTGCTGAAACGATTGAACTATtgtgacttgtgag 5
(((((((.....(((.....((((((((((((((.(((((((((((((((((((....))))))))))>>>>>>>>>->>>>>>>>>>>)))))))))))))
TTGCTGAAACGATTGAACTAT 5 miRNA
ptc-miRX17
tgcacgctctcgtaatgcttcattctcacaacggcaaagtgttattgcatcatcctaatgattatcatcagccgtcGTGGGAATGAACATTATGAGActgtgta 89
((((((.((((((((((.(((((((((((.(((((...((((....))))........((((....))))))))).>>>>>>>>>>>>>>>>>>>>>.))))))
ctcgtaatgcttcattctcaca 2
tcgtaatgcttcattctcacaa 23
ttcattctcacaacggcaaagt 1
ttcattctcacaacggcaaag 1
tcattctcacaacggcaaagt 4
tcagccgtcgtgggaatgaac 2
cgtgggaatgaacattatgag 3
GTGGGAATGAACATTATGAGA 41 miRNA
gtgggaatgaacattatgag 3
gtgggaatgaacattatgagact 1
gtgggaatgaacattatgagac 1
tgggaatgaacattatgaga 4
tgggaatgaacattatgagac 3
ptc-miRX22
ccaatcttagcttcttgttgtttagctTGATGATTAATTGACTGCAAAagcaactctcttctttttttaggagaggagttgcctttgcagtcaagtaatcatcaagctaaataccataactgaggactgaggtagaagg 7
((.(((((((((((.((.(((((((((<<<<<<<<<-<<<<<<<<<<<.(((((((((((((......)))))).))))))).))}}}}}}}}}=}}}}}}}}}}}))))))).)).....)))).)))))))....))
TGATGATTAATTGACTGCAAA 5 miRNA
tgatgattaattgactgca 1
tgcagtcaagtaatcatcaag 1
ptc-miRX3
gtataatgccaaccatagcctccattatcacactattttgtttggtattttaccaaacaaaatggTGTGATAATGAAGGCTATGGTtggcattattgc 13
(((((((((((((((((((((.(((((((((((((((((((((((((...)))))))))))))))>>>>>>>>>>->>>>>>>>>>)))))))).)))
aaatggtgtgataatgaaggc 1
atggtgtgataatgaaggcta 1
TGTGATAATGAAGGCTATGGT 9 miRNA
tgataatgaaggctatggttg 1
ataatgaaggctatggttggc 1
ptc-miRX40
cagcaatgtagtccttccgtcaactttgagatacgtgttacacttctgcatgtcacgtgaccacgctgtcaAAGTTGACGGAAGGACTACATtgctg 129
(((((((((((((((((((((((((((((.(..((((((((((........))...)))).)))).).)))>>>>>>>>>>>>>>>>>>>>>)))))
aagttgacggaaggacta 1
AAGTTGACGGAAGGACTACAT 120 miRNA
aagttgacggaaggactaca 3
agttgacggaaggactacat 3
tgacggaaggactacattgct 2
ptc-miRX41
gtttgaacttcttgcatgtcaagccgttcaagcctagtctgaaaggtcaggagggcgtgctattcggtctaggcCTGAACGGCTTGAAGGGCACGttgttcaggc 26
((((((((..(={{{==={{{{{{{{{{{{={(((((.(((((.((.((.(....).)))).))))).))))))->>>>>>>>>>>>--->>>->..))))))))
ttgcatgtcaagccgttcaag 1
ttcggtctaggcctgaacggc 11
tcggtctaggcctgaacggct 1
CTGAACGGCTTGAAGGGCACG 11 miRNA
tgaacggcttgaagggcacg 1
acggcttgaagggcacgttgt 1
ptc-miRX47
tctctttgccacgttgTTCATTCCTCTTCCTAAAATGGcttctccttcaattttaaaaaaaataaaaattaaaggagaatccaatatgaaatgagaagctattttaggaagggaatgaatacggtgtcggtgttataagaga 122
((((((.((((((..(<<<<<<<<-<<<<<<<<<<<<<((((((.((((.(((((.......)))))......((.....))....))))..))))))))}}}}}}}}}}}}}}}}}}==})..))).))).....))))))
ttcattcctcttcctaaa 1
ttcattcctcttcctaaaa 1
TTCATTCCTCTTCCTAAAATGG 90 miRNA
ttcattcctcttcctaaaatg 4
tcattcctcttcctaaaatgg 1
attcctcttcctaaaatgg 1
attttaggaagggaatgaata 13
ttttaggaagggaatgaat 1
ttttaggaagggaatgaata 9
ttaggaagggaatgaata 1
ptc-miRX50
cgctttcttcctttaaaaaatatcagttccatcatgagggctcagtaaacaacataattaacatcctaccaaggagcaagaaggctattaggaggtcaattcctttacctagcggaagtgttgttttgacatgagtggcatttatctcgatagtcttggatagaattatgctgcTTGCTGGGTCCTGATGATGGAactagcattttttaagggaagaaaacg 67
((.((((((((((((((((((.(.(((((((((((.((((((((((((.((.(((((((......(((((((((..(.(((..((((...(((((......)))))...))))..((((((..(((......)))..)))))).))).)....)))))).)))))))))).)).>>>>>>>>>>>>->>>>>>>>))).).)))))))))))))))))).))
tcagttccatcatgagggctcagt 1
atcatgagggctcagtaaacaac 1
atcatgagggctcagtaaacaaca 1
atcatgagggctcagtaaac 1
tcatgagggctcagtaaacaac 1
atgctgcttgctgggtcctga 1
ctgcttgctgggtcctgatgatgg 3
cttgctgggtcctgatgatgg 8
TTGCTGGGTCCTGATGATGGA 48 miRNA
ttgctgggtcctgatgatgg 2
ptc-miRX53
taatggtgggagagagcttccttcagcccactcatggataggagaaaggggttgaattagctgccgactcattcattcaagcaccagtagaaaaaggggaatggatattcttttgctactgtgattgTGTGAATGATGCGGGAGATAAttttacatcccctctttttctgtgcttggactgaagggagctccttccttctattg 74
((((((.(((((.(((((((((((((.(((..((((((.((((((..((((..((((({={{={{{=={{{{{{{{={{(.(((.(((((....((((((((....)))))))).)))))))).)))->>>>>>>>-->>>->>->>>))).....))))))))))))))))..))).))))))))))))))))))..))))))
tggtgggagagagcttccttc 4
tgaattagctgccgactcatt 1
agctgccgactcattcattca 9
agctgccgactcattcattc 1
agctgccgactcattcatt 2
ttgtgtgaatgatgcgggaga 2
tgtgaatgatgcgggagata 3
tgtgaatgatgcgggagataat 3
tgtgaatgatgcgggagat 1
tgtgaatgatgcgggaga 2
TGTGAATGATGCGGGAGATAA 23 miRNA
tgtgcttggactgaagggagc 2
tgcttggactgaagggagctc 1
cttggactgaagggagctcc 3
cttggactgaagggagct 1
ttggactgaagggagctcc 6
ttggactgaagggagctc 6
ttggactgaagggagctcctt 4
ptc-miRX63
ctctatgcatggtctcagggtggcaatcattgttcactctccctcaaggcttccaacgcaataaccagctacgtacatgtaactgtgttacggctgcaggctTGAGGCCTTTGGGGGAGAGTGGtcaaaagttgtcatgattttggcagacgag 1019
(((..(((..((((.....((((((((..(((..(((((((((((((((((((.((.((......((((..(((((((......))).))))))))...)))>>>>>>>->>>>>>>>>>>>>-.)))..))))))))))))...)))...)))
actctccctcaaggcttcca 15
actctccctcaaggcttc 1
actctccctcaaggcttccaa 77
ctctccctcaaggcttccaa 1
ctgtgttacggctgcaggc 1
tgaggcctttgggggaga 1
tgaggcctttgggggagagtg 4
TGAGGCCTTTGGGGGAGAGTGG 905 miRNA
tgaggcctttgggggagag 7
tgaggcctttgggggagagtggt 2
gaggcctttgggggagagtgg 5
ptc-miRX64
ttctagaggtaattaacatctaacatctgcagactacttgccttgttactgccgtgcctattttgaatatatatattcaaaaTAGGCACAGAATTAACAAGGCaagtattcagtagatgttagataggatgagctaaggctggag 91
((((((.(((.(((...(((((((((((((.((.(((({{{{{{{{{{==={={{{{{{((((((((((....)))))))))>>>>>>>->--->>>>>>>>>))))).)).)))))))))))))..)))..)))....))))))
taacatctgcagactacttgcc 1
catctgcagactacttgcctt 8
catctgcagactacttgcct 3
tgcagactacttgccttgtta 2
tgcagactacttgccttgt 1
tgccttgttactgccgtgcct 1
taggcacagaattaacaaggcaag 8
TAGGCACAGAATTAACAAGGC 57 miRNA
taggcacagaattaacaaggcaa 2
taggcacagaattaacaagg 1
attaacaaggcaagtattcag 1
taacaaggcaagtattcagta 4
acaaggcaagtattcagtagatgt 1
aggcaagtattcagtagatgt 1
ptc-miRX74
ggctgcttctttttctctctgggcacgttgTTCATTCCTCTTCCTAAAATGGcttcttctcctttagttgttgcaattataggagaggagaatccattttaggaagggaatgaatactgtgtcggttttacgagggagacaatc 132
(..(((((((((......((((.((((.((<<<<<<<<-<<<<<<<<<<<<<.((((((((((.((((((...)))))).))))))))))...))}}}}}}}}}}}}}}}}}}}}}.))))))))......))))))).))..)
ttcattcctcttcctaaa 1
ttcattcctcttcctaaaa 1
TTCATTCCTCTTCCTAAAATGG 90 miRNA
ttcattcctcttcctaaaatg 4
tcattcctcttcctaaaatgg 1
attcctcttcctaaaatgg 1
ttcctaaaatggcttcttc 1
ttcctaaaatggcttcttctc 4
attttaggaagggaatgaata 13
ttttaggaagggaatgaat 1
ttttaggaagggaatgaata 9
ttaggaagggaatgaatactgtgt 3
ttaggaagggaatgaatactgtg 2
ttaggaagggaatgaata 1
ptc-miRX76
atgctactacatggatggagaagcttccgatctccctcaaaggcttcctctataattgccttacatgatggcattagTGGACTCCTTTGGGGAGATGGagagcttactccccataactcaatggcat 240
((((((....((((..(((((((((..(.{{{{{{{={{{{{{=={{{={((....((((.........)))).)))->>>-->>>>>>>>>>>>>->..))))).)))))))).......))))))
atctccctcaaaggcttcctc 10
tctataattgccttacatgatg 1
ttacatgatggcattagtggac 2
tacatgatggcattagtggact 3
acatgatggcattagtggact 9
gatggcattagtggactc 1
ggcattagtggactcctttggg 1
TGGACTCCTTTGGGGAGATGG 198 miRNA
ggactcctttggggagatgg 15
ptc-miRX79
tggctttcatagttaTAACATCTTGATCAATGGCCAttgtaagagtagaaggatccatgaagcaataattctctttgctaaaatgtgtgataaaacattgactcctggtatttcactcttacagtgcccattgattaagatggtataatgttgttatca 837
(((.(..((..((((<<-<<<<<<<<<<<<<<<-<<((((((((((.((((...(((.(((((((.........)))))..(((((........)))))...)).)))..)))))))))))))))).))))))))))))))).))))))..))..))))
ataacatcttgatcaatggcc 21
ataacatcttgatcaatggcca 9
TAACATCTTGATCAATGGCCA 302 miRNA
taacatcttgatcaatggc 2
taacatcttgatcaatggccat 4
taacatcttgatcaatggcc 91
aacatcttgatcaatggccattg 4
aacatcttgatcaatggcc 12
aacatcttgatcaatggcca 3
acatcttgatcaatggccattg 1
acatcttgatcaatggcc 1
catcttgatcaatggcca 1
catcttgatcaatggccattg 84
catcttgatcaatggccatt 4
catcttgatcaatggccat 1
atcttgatcaatggccattg 4
atcttgatcaatggccatt 2
tcttgatcaatggccattgta 97
tcttgatcaatggccattgt 3
tcttgatcaatggccattg 2
ttgatcaatggccattgtaag 5
tgatcaatggccattgtaaga 2
tcaatggccattgtaagagt 1
tcaatggccattgtaagagta 20
tcaatggccattgtaagag 1
caatggccattgtaagagta 1
caatggccattgtaagagtag 8
caatggccattgtaagagtaga 11
aatggccattgtaagagtaga 32
aatggccattgtaagagtagaa 15
ttgtaagagtagaaggatccatg 1
ttgtaagagtagaaggatccat 1
cactcttacagtgcccattga 5
actcttacagtgcccattgat 1
ttacagtgcccattgatta 1
ttacagtgcccattgattaaga 1
ttacagtgcccattgattaag 81
ttacagtgcccattgattaa 1
tacagtgcccattgattaag 1
ptc-miRX82
tgattcttctggtattgtctcaattgcctttgcaattgatcaacaatcaaatgtagattgttgttctagatcaatTGCAAAGGTAACTGAGACAATcaaatgtagaactaagggaaca 9
((.((((..(((((((((((((.(((((((((((((((((((((((((.......)))))))......)))))))>>>>>>>>>>>->>>>>>>>>..........))))..))))))
TGCAAAGGTAACTGAGACAAT 6 miRNA
caaaggtaactgagacaatca 3
ptc-miRX84
ggtttggggaggggagtTCTGTCGCTGGAAAGATGGTACctagggctgcatattaatgtgtatagcaagcaataggcaccatcttcccgcgacggaactcccctctaacctctacc 100
(((..((((((((((((<<<<<<<<-<<<<-<<<<<<-<(((..(((((((((......)))).)).)))..)))).)))))))))).)))))))))))))))))...)))..)))
ttctgtcgctggaaagatggtac 1
ttctgtcgctggaaagatggt 4
ttctgtcgctggaaagatggta 1
TCTGTCGCTGGAAAGATGGTAC 66 miRNA
tctgtcgctggaaagatgg 1
tctgtcgctggaaagatggta 23
tctgtcgctggaaagatggtacc 1
ctgtcgctggaaagatggtacc 1
tgtcgctggaaagatggtacct 1
tcgctggaaagatggtacctag 1
ptc-miRX88
tagctgggtaacgtggaCTTGTAACCTGAGTAGAGGCAataaagtgatataacattggctcgctcagcttagaaggtcgggtccagtta 12
(((((((...((.((..<<<-<<<-<<<<<<-<<<-<<((...((......)))))).))))))))).))).)))..)).)))))))))
CTTGTAACCTGAGTAGAGGCA 9 miRNA
ttgtaacctgagtagaggcaa 1
ctcgctcagcttagaaggtcg 1
tcgctcagcttagaaggtcgg 1
ptc-miRXX156
gTTGACAGAAGATGGAGAGCACagctacatgtaatcgagaattagtcctgtagaagtgcagtttgtgctttgtgttttcttttcttctttaaac 40
(<<---<<<<<<-<<<<<<<<<(.(((((.(....(........).).))))).((..(.....)..)).))))))))))..))))))...)))
TTGACAGAAGATGGAGAGCAC 40 miRNA
ptc-miRXX164
gcggtttacaattgggtgtgtagctcttgcTGGAGAAGCAGGGCACGTGCAagctctctcctcaggctttccttgcacgtgctccccttctccaacatgggtttctcacctttcctc 2922
(.((.........(((((.(.(((((.((.<<<<<<<<--<<<<<<<<<<<((......((...)).....)))))))))))))..)))))))).)).))))).).)))))..)).)
ctggagaagcagggcacgtgca 3
tggagaagcagggcacgtgc 11
TGGAGAAGCAGGGCACGTGCA 2901 miRNA
tggagaagcagggcacgtg 5
ggagaagcagggcacgtgca 1
gagaagcagggcacgtgca 1
ptc-miRXX166
agttgaggggaatgctgtctggttcgagaccattcacctgaagcgcacgcattcatcttttgagtgaTCTCGGACCAGGCTTCATTCCccccaact 1730
(((((.((((((((..(((((((((((((.((((((..((((((....)).)))).....)))))).>>>>>>>>>>>>>-->>>>>>)).)))))
atctcggaccaggcttcattcccc 11
atctcggaccaggcttcattc 2
atctcggaccaggcttcattcc 3
TCTCGGACCAGGCTTCATTCC 1490 miRNA
tctcggaccaggcttcattc 19
tctcggaccaggcttcatt 6
tctcggaccaggcttcat 8
ctcggaccaggcttcattcccc 1
ctcggaccaggcttcattcc 2
ctcggaccaggcttcattccc 12
tcggaccaggcttcattcc 10
tcggaccaggcttcattccccc 2
tcggaccaggcttcattccc 6
tcggaccaggcttcattc 5
tcggaccaggcttcattcccc 150
cggaccaggcttcattccc 1
cggaccaggcttcattcccc 2
ptc-miRXX166a
tgagagaagagaggtctaatatgaggatcagagccttgtgtggAAGCCAAGGGTGACTTGCCTGAgcatttcaggaaggtttctatatgaaagctttttgttagttttgcaggaagtcaacctcggctttcctgtagtctcttctttctcatgctatgcctttctcttcttcca 5
((..(((((((((((.((.((((((((..((((.((...(.((<<<<<-<<<-<<<<<<-<<<<-......(((((((.((((.....)))).))))))).........)))))))))).))).))))))))...)).))))...)))))))).)).)))..))))))))..))
AAGCCAAGGGTGACTTGCCTGA 5 miRNA
ptc-miRXX169d
ggtgtaggagttttgcatgaagaggtagagagtagaatgCAGCCAAGGATGACTTGCCGGcatttcctcccagctagctagcaagccttctatttggcatgcctggccggcaggatgtccttggctatattttgttctcttcttctcatgtgagactccaggcc 52
(((.(.(((((((..(((((.((((.(((((((((((((-<<<<<<<<<<<-<<<<<<<<(..........((....)).(((.(((........))).)))...))))))))).))))))))))).))))))))))))).)))))))))..)))))))).)))
cagccaaggatgacttgccggc 1
CAGCCAAGGATGACTTGCCGG 49 miRNA
cagccaaggatgacttgccggca 1
agccaaggatgacttgccgg 1
ptc-miRXX169*
tcactgtaacagccttgcatggaggatcataaagattgatgcagccaaggatgacttgccgacgactcgtttttgcttccatcaatatacgcataattaagaagagatgaatccgttGGCAGGTTGTTCTTGGCTACatttttctttctgctcctcatgccaggcttatggtga 242
((((((((..(((((.(((((.((((.((.(((((..((((.{{{{{{{{{=={{{{{{{{{((..((((((((.(((....................))).))))))))...))))>>>>>>>-->>>>>>>>>->)))..))))).)).))))))))).)))))))))))))
cagccaaggatgacttgccga 53
agccaaggatgacttgccga 3
ttggcaggttgttcttggctac 1
tggcaggttgttcttggctac 16
ggcaggttgttcttggctacatt 3
GGCAGGTTGTTCTTGGCTAC 146 miRNA
ggcaggttgttcttggcta 4
ggcaggttgttcttggct 4
ggcaggttgttcttggctacat 1
ggcaggttgttcttggctaca 10
gcaggttgttcttggctac 1
ptc-miRXX169a
gagatgatggccttacatgaagataagagtcttgtttgtAGCCAAGGACGACTTGCCCAcaatatgtatcgtgagcgtttccaatttgcaacctcatacttggttgttttgggcagtctccttggctatgcagatggactcttctcagtcatgataggcatcttctc 553
((((.((((.(((..(((((.((.((((((((.((((((<<<<<<<<<-<<<<-<<<<<..........(....)............((((((........)))))).=}}}}}}}}}}}}}}}}}}=.)))))))))))))).))..)))))..))))))).))))
tagccaaggacgacttgccca 30
tagccaaggacgacttgccc 2
tagccaaggacgacttgc 1
tagccaaggacgacttgcccaca 11
tagccaaggacgacttgcccac 44
tagccaaggacgacttgcc 3
agccaaggacgacttgcc 1
AGCCAAGGACGACTTGCCCA 438 miRNA
agccaaggacgacttgcccac 7
agccaaggacgacttgccc 1
gccaaggacgacttgccca 1
ttgggcagtctccttggcta 1
ggcagtctccttggctatgc 3
ggcagtctccttggctat 9
ggcagtctccttggctatg 1
ptc-miRXX169b
gagatgatggtcttgcatgaagataagagtgttgttcggtAGCCAAGGACGACTTGCCCAcactatgagacaagtggttagaattagcaacttcttaattggttatgggaagtctccttggctatgctgacagactcttctcgatcatgccaggcatcttctt 539
((((.((((.(((.((((((.((.((((((.((((.((((<<<<<<<<<-<<<<<-<<<<.(((((((((..(((.((((....)))).))))))))..))))..))))))))))))))))))..)))))))))))))).))..)))))).))))))).))))
tagccaaggacgacttgccca 30
tagccaaggacgacttgccc 2
tagccaaggacgacttgc 1
tagccaaggacgacttgcccaca 11
tagccaaggacgacttgcccac 44
tagccaaggacgacttgcc 3
agccaaggacgacttgcc 1
AGCCAAGGACGACTTGCCCA 438 miRNA
agccaaggacgacttgcccac 7
agccaaggacgacttgccc 1
gccaaggacgacttgccca 1
ptc-miRXX171
gggattgtttaccgtgttgaaatcatgtggaagagtgactatgatattggcctggttcactcagatcacgacttcagagcaaagtgtctttcttcttcttctttttcttcttcttcttgttttatgttcgtttgattTGATTGAGCCGTGCCAATATCtcagtactctttcatgtctctccaagtcgatctccagaaacactattcc 13
((((((((((.....(((((....(((((((((((((.((..(((((((((.(((((((.(((((((((((.(..(((((((..................................)))))))..).))))..))))>>>->>>>>>>->>>>>>>>>..))))))))))))))).........)))))......)))))..)))))
TGATTGAGCCGTGCCAATATC 12 miRNA
tgattgagccgtgccaatat 1
ptc-miRXX171g*
gagaaagtgggggatgttgggatggctcaatcatgtcaaatctcccaaattatgatgttgggtcttttaatcTGATTGAGCCGTGCCAATATCacacttctt 29
(((((.(((...{{{{{{{{={{{{{{{{{{{{.((.(((...(((((.........)))))...))).)).>>>>>>>>>>>>->>>>>>>>.))))))))
ggatgttgggatggctcaatcatg 1
gatgttgggatggctcaatca 3
tgttgggatggctcaatcatg 7
gttgggatggctcaatcatg 1
gttgggatggctcaatcatgt 2
ttgggatggctcaatcatgt 1
TGATTGAGCCGTGCCAATATC 12 miRNA
tgattgagccgtgccaatat 1
ttgagccgtgccaatatcac 1
ptc-miRXX171h*
cgtgtggtaagttcggagaaagtgggggaTGTTGGGATGGCTCAATCATAtcaaatctcccaaactatgatgttgggtcgtttaatctgattgagccgtgccaatatcacactaactatatatg 31
((((((...((((.......((((...((<<<<<<-<<<<<<<<<<<<-<(.((((..(((((.(......))))))..)))).)).}}}}}}}}}}}}=}}}}}}}}.)))))))).))))))
gatgttgggatggctcaatca 3
TGTTGGGATGGCTCAATCATA 13 miRNA
gttgggatggctcaatcata 1
tgattgagccgtgccaatatc 12
tgattgagccgtgccaatat 1
ttgagccgtgccaatatcac 1
ptc-miRXX172
aagattatcagtctatattggccgatgcggcagcatcaagattcacaaactttaaggcttgagttggggtggtacacggtcccctcctttactcgaaaggttccttaatttctgatgGGAATCTTGATGATGCTGCATcggcaaatatatgactattcttctt 80
((((..(..((((((((((.(((((({{{{{{={{{{{{{{{{{={{....((((((.((((((.((((.((........)).))))...))))))......)))))).......))->>>>>>>>>>>->>>>>>>>)))).)))))).))))..)..))))
gcggcagcatcaagattcaca 9
gcggcagcatcaagattcac 7
tgggaatcttgatgatgctgcat 1
gggaatcttgatgatgctgcat 5
gggaatcttgatgatgctgca 11
ggaatcttgatgatgctgc 1
GGAATCTTGATGATGCTGCAT 39 miRNA
ggaatcttgatgatgctgca 2
gaatcttgatgatgctgcat 2
aatcttgatgatgctgcat 1
atcttgatgatgctgcat 1
tcttgatgatgctgcatcggc 1
ptc-miRXX2111
cttgatattgggtcaggacttggTAATCTGCATCCTGAGGTTTGgatcatcatgtagtttgatctagtccttgggttgcagattacctcttcctcactgacaatgcagag 28
(((..((((((((.((((...((<<<<<<<<<-<<--<<<-<<<(((((..........)))))))}=}}}==}}=}}}}}}}}}}}...)))).)))..)))))..)))
taatctgcatcctgaggttt 4
taatctgcatcctgaggtt 1
TAATCTGCATCCTGAGGTTTG 12 miRNA
gtccttgggttgcagattacc 11
ptc-miRXX2111a
gagaagagccggagggggagactgagacctactggaagttgtgggcatgaggtgtttggcaagaaaatggatcttttccttatgatgatttcTTACCAATACCTCTCATGCCAAtgatttccagcagttcctccctttcccttctttctc 25
((((((((..((((((((((((((.......((((((((..(.(((((((((.((((((.((((((..(((.....))).........))))>>->>>>->>->>>>>>>>>->..))))))))))))..)))))))))).))).)))))
ctggaagttgtgggcatgagg 7
tggaagttgtgggcatgaggt 1
tgggcatgaggtgtttggcaa 5
ggcatgaggtgtttggcaaga 1
TTACCAATACCTCTCATGCCAA 11 miRNA
ptc-miRXX2111b
atattgggtcaggattgggTAATCTGCATCCTGAGGTTTGgatcaccacatgttttgatctagtccttgggttgcagattacctcttcctcactgacaatgt 28
(((((((((.((((..(((<<<<<<<<<-<<--<<<-<<<(((((..........)))))))}=}}}==}}=}}}}}}}}}}})..)))).)))..))))))
taatctgcatcctgaggttt 4
taatctgcatcctgaggtt 1
TAATCTGCATCCTGAGGTTTG 12 miRNA
gtccttgggttgcagattacc 11
ptc-miRXX393*
gcaactagaggaggcatccaaagggatcgcattgatcccgagtgtccctggccataattttggATCATGCTATCCCTTTGGATTcctcctttggtggc 195
((.(((((((((((.({{{{{{{{{{{={{{{={{{{(.((((.............)))).))>>>>>>>->>>>>>>>>>>>-))))))))))).))
agaggaggcatccaaaggga 1
agaggaggcatccaaagggat 1
gaggcatccaaagggatcgca 1
aggcatccaaagggatcgca 2
aggcatccaaagggatcgcat 3
tccaaagggatcgcattgat 12
tccaaagggatcgcattgatc 41
tccaaagggatcgcattgatcc 42
caaagggatcgcattgatcc 1
gatcatgctatccctttggat 1
atcatgctatccctttggat 2
ATCATGCTATCCCTTTGGATT 80 miRNA
atcatgctatccctttggattc 1
tcatgctatccctttggattc 6
tatccctttggattcctcctt 1
ptc-miRXX393a*
atgtttttactgcaactagaggaggcatccaaagggatcgcattgatcccaagtgtctgtcccccataattttggATCATGCTATCCCTTTGGATTcctcctttggtggcttctataacat 195
(((((......((.(((((((((((.({{{{{{{{{{{={{{{={{{{(.((((...((.....))..)))).))>>>>>>>->>>>>>>>>>>>-))))))))))).))......)))))
agaggaggcatccaaaggga 1
agaggaggcatccaaagggat 1
gaggcatccaaagggatcgca 1
[truncated: 126 more rows]
