# Supplementary material for: Deep Annotation of Populus trichocarpa microRNAs from Diverse Tissue Sets
Source: PLoS One. 2012 Mar 19;7(3):e33034. doi: 10.1371/journal.pone.0033034 (PMC3307732; doi:10.1371/journal.pone.0033034)
Supplement: Table S8 — Targets predicted for miRNAs identified in MTX library. (XLSX) [file pone.0033034.s008.xlsx]

## Sheet: Sheet1
Supplemental Table S8			miRNA 5' -> 3'
MTX miRNA predicted targets
			Target 3' -> 5'
miRNA_Acc.	Target_Acc.	Expectation	miRNA_aligned_fragment	Ath.	Abb.	Description	Unpaired energy	Target_start	Target_end
ptc-miR1444a	POPTR_0001s39950.1|PACid:18234580	2	UCCACAUUCGGUCAAUGUUCC				18.716	1064	1084
			.|||||o||||||||||||||
			GGGUGUUAGCCAGUUACAAGG
ptc-miR1444a	POPTR_0011s04710.1|PACid:18231823	1.5	UCCACAUUCGGUCAAUGUUC				18.419	1068	1087
			o||||||||||||||.||||
			UGGUGUAAGCCAGUUGCAAG
ptc-miR1444a	POPTR_0011s10940.1|PACid:18231334	2	UCCACAUUCGGUCAAUGUUC				13.649	603	622
			|||||||||||||||..||o
			AGGUGUAAGCCAGUUGUAAA
ptc-miR1444a	POPTR_0011s10950.1|PACid:18230725	2	UCCACAUUCGGUCAAUGUUC				13.996	1026	1045
			|||||||||||||||..||o
			AGGUGUAAGCCAGUUGUAAA
ptc-miR1444a	POPTR_0013s06080.1|PACid:18220256	2.5	UCCACAUUCGGUCAAUGUUCC	AT3G03750.2	SDG20	SET domain protein 20	11.859	532	552
			||||||.|||||||o|.|.||
			AGGUGUGAGCCAGUAAUAGGG
ptc-miR1444a	POPTR_0001s39900.1|PACid:18238421	2	UCCACAUUCGGUCAAUGUUC				15.271	999	1018
			.||||||||||||o|.||||
			GGGUGUAAGCCAGCUGCAAG
ptc-miR1444a	POPTR_0001s39670.1|PACid:18236657	2	UCCACAUUCGGUCAAUGUUC				16.415	579	598
			.||||||||||||o|.||||
			GGGUGUAAGCCAGCUGCAAG
ptc-miR1444a	POPTR_0001s39650.1|PACid:18236941	2	UCCACAUUCGGUCAAUGUUC				17.456	960	979
			.||||||||||||o|.||||
			GGGUGUAAGCCAGCUGCAAG
ptc-miR1444a	POPTR_0001s39940.1|PACid:18238843	2	UCCACAUUCGGUCAAUGUUC				16.792	1056	1075
			.||||||||||||o|.||||
			GGGUGUAAGCCAGCUGCAAG
ptc-miR1444a	POPTR_0001s39920.1|PACid:18238362	2	UCCACAUUCGGUCAAUGUUC				17.722	1074	1093
			.||||||||||||o|.||||
			GGGUGUAAGCCAGCUGCAAG
ptc-miR1444a	POPTR_0001s39630.1|PACid:18237075	2	UCCACAUUCGGUCAAUGUUC				17.456	1074	1093
			.||||||||||||o|.||||
			GGGUGUAAGCCAGCUGCAAG
ptc-miR1444a	POPTR_0001s39680.1|PACid:18238943	2	UCCACAUUCGGUCAAUGUUC				15.269	1074	1093
			.||||||||||||o|.||||
			GGGUGUAAGCCAGCUGCAAG
ptc-miR1444a	POPTR_0001s39660.1|PACid:18235564	2.5	UCCACAUUCGGUCAAUGUUC				16.987	1074	1093
			.|||||||||.||o|.||||
			GGGUGUAAGCUAGCUGCAAG
ptc-miR1444a	POPTR_0003s21690.1|PACid:18217366	3	UCCACAUUCGGUCAAUGUUCC	AT5G13000.1	GSL12	glucan synthase-like 12	14.264	1130	1150
			||||||||||.||||o|.|o|
			AGGUGUAAGCUAGUUUCGAAG
ptc-miR1444a	POPTR_0001s04970.1|PACid:18234377	3	UCCACAUUCGGUCAAUGUUCC	AT5G13000.1	GSL12	glucan synthase-like 12	16.388	1409	1429
			||||||||||.||||o|.|o|
			AGGUGUAAGCUAGUUUCGAAG
ptc-miR1444a	POPTR_0005s22510.1|PACid:18206702	3	UCCACAUUCGGUCAAUGUUCC	AT1G06490.1	GSL07	glucan synthase-like 7	14.894	1466	1486
			|||||||||||||||o..|o|
			AGGUGUAAGCCAGUUUUGAAG
ptc-miR1444a	POPTR_0011s09740.1|PACid:18231077	3	UCCACAUUCGGUCAAUGUUCC	AT3G14570.1	GSL04	glucan synthase-like 4	16.582	1559	1579
			|||||||||o.||||o|.|||
			AGGUGUAAGAUAGUUUCGAGG
ptc-miR1444a	POPTR_0003s11430.1|PACid:18216777	3	UCCACAUUCGGUCAAUGUUCC	AT1G07770.1	RPS15A	ribosomal protein S15A	15.174	199	219
			||||||||o|o|||||o||||
			AGGUGUAAACAAGUUAGAAGG
ptc-miR1444a	POPTR_0015s00860.1|PACid:18233114	4	UCCACAUUCGGUCAAUGUUCC	AT5G53660.1	GRF7	growth-regulating factor 7	24.558	902	922
			||o||||.|.|||||o|.|||
			AGUUGUAGGUCAGUUUCGAGG
ptc-miR1444a	POPTR_0002s05970.1|PACid:18245655	3.5	UCCACAUUCGGUCAAUGUUCC	AT1G06490.1	GSL07	glucan synthase-like 7	17.398	1466	1486
			||||||||||.||||o..|o|
			AGGUGUAAGCUAGUUUUGAAG
ptc-miR1444a	POPTR_0015s06080.1|PACid:18233450	3	UCCACAUUCGGUCAAUGUUC				19.772	207	226
			||||||||o|..||||o|||
			AGGUGUAACCUGGUUAGAAG
ptc-miR1444a	POPTR_0003s12350.1|PACid:18216539	4.5	UCCACAUUCGGUCAAUGUUCC	AT1G12760.1		Zinc finger, C3HC4 type (RING finger) family protein	18.554	958	978
			o||o|||||.||||o|.||||
			CGGCGUAAGUCAGUAAUAAGG
ptc-miR1444a	POPTR_0003s21000.1|PACid:18216393	4.5	UCCACAUUCGGUCAAUGUUC				13.068	185	204
			|||||o|.||||||||.|oo
			AGGUGAAGGCCAGUUAUAUA
ptc-miR1444a	POPTR_0019s07980.1|PACid:18219503	4	UCCACAUUCGGUCAAUGUUCC	AT1G65320.1		Cystathionine beta-synthase (CBS) family protein	20.791	109	129
			.|||||.||.|||o||o.|||
			GGGUGUGAGUCAGCUAAGAGG
ptc-miR1444a	POPTR_0002s11110.1|PACid:18245160	4.5	UCCACAUUCGGUCAAUGUUCC	AT1G55860.1	UPL1	ubiquitin-protein ligase 1	21.529	475	495
			o||||||.|..||||.o|.||
			CGGUGUAGGUUAGUUGAAGGG
ptc-miR1444b	POPTR_0011s04710.1|PACid:18231823	0	CACAUUCGGUCAACGUUCGAG				18.475	1065	1085
			|||||||||||||||||||||
			GUGUAAGCCAGUUGCAAGCUC
ptc-miR1444b	POPTR_0001s39900.1|PACid:18238421	1	CACAUUCGGUCAACGUUCGAG				18.493	996	1016
			|||||||||||o|||||||||
			GUGUAAGCCAGCUGCAAGCUC
ptc-miR1444b	POPTR_0001s39670.1|PACid:18236657	1	CACAUUCGGUCAACGUUCGAG				18.747	576	596
			|||||||||||o|||||||||
			GUGUAAGCCAGCUGCAAGCUC
ptc-miR1444b	POPTR_0001s39650.1|PACid:18236941	1	CACAUUCGGUCAACGUUCGAG				18.419	957	977
			|||||||||||o|||||||||
			GUGUAAGCCAGCUGCAAGCUC
ptc-miR1444b	POPTR_0001s39940.1|PACid:18238843	1	CACAUUCGGUCAACGUUCGAG				17.67	1053	1073
			|||||||||||o|||||||||
			GUGUAAGCCAGCUGCAAGCUC
ptc-miR1444b	POPTR_0001s39680.1|PACid:18238943	1	CACAUUCGGUCAACGUUCGAG				18.253	1071	1091
			|||||||||||o|||||||||
			GUGUAAGCCAGCUGCAAGCUC
ptc-miR1444b	POPTR_0001s39920.1|PACid:18238362	1	CACAUUCGGUCAACGUUCGAG				20.068	1071	1091
			|||||||||||o|||||||||
			GUGUAAGCCAGCUGCAAGCUC
ptc-miR1444b	POPTR_0001s39630.1|PACid:18237075	1	CACAUUCGGUCAACGUUCGAG				18.419	1071	1091
			|||||||||||o|||||||||
			GUGUAAGCCAGCUGCAAGCUC
ptc-miR1444b	POPTR_0011s10940.1|PACid:18231334	1.5	CACAUUCGGUCAACGUUCGAG				13.547	600	620
			||||||||||||||.||o|||
			GUGUAAGCCAGUUGUAAACUC
ptc-miR1444b	POPTR_0011s10950.1|PACid:18230725	1.5	CACAUUCGGUCAACGUUCGAG				13.731	1023	1043
			||||||||||||||.||o|||
			GUGUAAGCCAGUUGUAAACUC
ptc-miR1444b	POPTR_0001s39660.1|PACid:18235564	1.5	CACAUUCGGUCAACGUUCGAG				19.15	1071	1091
			||||||||.||o|||||||||
			GUGUAAGCUAGCUGCAAGCUC
ptc-miR1444b	POPTR_0007s15030.1|PACid:18243256	4.5	CACAUUCGGUCAACGUUCGAG	AT2G34780.1	MEE22	maternal effect embryo arrest 22	13.329	91	111
			oo||||||||o|||||.|.||
			AGGUAAGCCAUUUGCAGGUUC
ptc-miR1444b	POPTR_0001s45960.1|PACid:18237751	4.5	CACAUUCGGUCAACGUUCGAG	AT1G14130.1		2-oxoglutarate (2OG) and Fe(II)-dependent oxygenase superfamily protein	20.041	386	406
			o||o|||.|.||||o||||||
			UUGAAAGUCGGUUGAAAGCUC
ptc-miR1444b	POPTR_0003s17750.1|PACid:18216340	3.5	CACAUUCGGUCAACGUUCGAG	AT1G80630.1		RNI-like superfamily protein	18.007	1321	1341
			|||||||.|o||||o|||o||
			GUGUAAGUCCGUUGGAAGGUC
ptc-miR1444b	POPTR_0002s15660.1|PACid:18245531	3.5	CACAUUCGGUCAACGUUCGA	AT3G61180.1		RING/U-box superfamily protein	20.47	897	916
			|||||||.||||o|.|.|o|
			GUGUAAGUCAGUAGUAGGGU
ptc-miR1444b	POPTR_0014s07100.1|PACid:18224188	4.5	CACAUUCGGUCAACGUUCGA	AT1G63170.1		Zinc finger, C3HC4 type (RING finger) family protein	12.398	81	100
			|||||||.||||o|.|.|oo
			GUGUAAGUCAGUAGUAGGGA
ptc-miR1444b	POPTR_0005s24150.1|PACid:18208416	4.5	CACAUUCGGUCAACGUUCGAG	AT1G12700.1		ATP binding;nucleic acid binding;helicases	14.471	208	228
			|||||.o||.||||.o.|||.
			GUGUAGUCCGGUUGUUGGCUU
ptc-miR1444b	POPTR_0008s03030.1|PACid:18247968	4.5	CACAUUCGGUCAACGUUCGAG	AT5G04440.1		Protein of unknown function (DUF1997)	22.457	415	435
			||||o||||.o|||o|||.||
			GUGUUAGCCGCUUGGAAGUUC
ptc-miR1444b	POPTR_0014s07110.1|PACid:18223790	4.5	CACAUUCGGUCAACGUUCGA	AT3G61180.1		RING/U-box superfamily protein	15.994	888	907
			|||||||.||||o|.|.|oo
			GUGUAAGUCAGUAGUAGGGA
ptc-miR1444b	POPTR_0001s39950.1|PACid:18234580	4.5	CACAUUCGGUCAACGUUCGA				16.095	1063	1082
			||||o||||||||o||||oo
			GUGUUAGCCAGUUACAAGGG
ptc-miR1446a	POPTR_0012s09550.1|PACid:18229497	2.5	UUCUGAACUCUCUCCCUCAA	AT1G66350.1	RGL1	RGA-like 1	19.042	752	771
			oo||||||||||||||||||
			UUGACUUGAGAGAGGGAGUU
ptc-miR1446a	POPTR_0014s17680.1|PACid:18222934	2.5	UUCUGA-ACUCUCUCCCUCAA	AT5G27740.1	EMB2775	ATPase family associated with various cellular activities (AAA)	12.218	820	840
			||||||o||||||||||||||
			AAGACUAUGAGAGAGGGAGUU
ptc-miR1446a	POPTR_0013s09080.1|PACid:18221580	3.5	UUCUGAACUCUCUCCCUCAA	AT4G10150.1		RING/U-box superfamily protein	20.545	651	670
			|.|||||||||||||||oo|
			AGGACUUGAGAGAGGGAACU
ptc-miR1446a	POPTR_0006s04360.1|PACid:18211373	2	UUCUGAACUCUCUCCCUCAA	AT2G41450.1		N-acetyltransferases;N-acetyltransferases	15.534	475	494
			|||||||o|||||o||||||
			AAGACUUCAGAGAAGGAGUU
ptc-miR1446a	POPTR_0007s11250.1|PACid:18243419	3	UUCUGAACUCUCUCCCUCAAC	AT2G23440.1			15.709	67	87
			||||.|||||.o|||o|||||
			AAGAUUUGAGGAAGGAAGUUG
ptc-miR1446a	POPTR_0002s13620.1|PACid:18244351	3	UUCUGAACUCUCUCCCUCAAC	AT3G60190.1	DL1E	DYNAMIN-like 1E	19.947	130	150
			|.|||||||||o|||o.||||
			AGGACUUGAGACAGGUGGUUG
ptc-miR1446a	POPTR_0014s04310.1|PACid:18223115	3	UUCUGAACUCUCUCCCUCAAC	AT3G60190.1	DL1E	DYNAMIN-like 1E	20.44	130	150
			|.|||||||||o|||o.||||
			AGGACUUGAGACAGGUGGUUG
ptc-miR1446a	POPTR_0001s08550.1|PACid:18235007	3	UUCUGAACUCUCUCCCUCAA	AT1G62990.1	KNAT7	KNOTTED-like homeobox of Arabidopsis thaliana 7	15.322	589	608
			|o|.|||||||||||o||||
			ACGGCUUGAGAGAGGUAGUU
ptc-miR1446a	POPTR_0002s01670.1|PACid:18246983	3.5	UUCUGAACUCUCUCCCUCAAC	AT1G78610.1	MSL6	mechanosensitive channel of small conductance-like 6	19.273	417	437
			.||||||||o.o.||||||||
			GAGACUUGACGAGGGGAGUUG
ptc-miR1446a	POPTR_0015s10310.1|PACid:18232957	4.5	UUCUGAACUCUCUCCCUCAA	AT1G66350.1	RGL1	RGA-like 1	19.029	755	774
			oo|o.|||||||||||||||
			UUGUUUUGAGAGAGGGAGUU
ptc-miR1446a	POPTR_0009s12500.1|PACid:18227977	3.5	UUCUGAACUCUCUCCCUCAA				12.227	187	206
			|||||o|||||||||||o|o
			AAGACGUGAGAGAGGGAAUC
ptc-miR1446a	POPTR_0003s19870.1|PACid:18217847	3.5	UUCUGAACUCUCUCCCUCAAC	AT3G14460.1		LRR and NB-ARC domains-containing disease resistance protein	17.121	1206	1226
			|.|.|||o.||||||o|||||
			AGGGCUUUGGAGAGGAAGUUG
ptc-miR1446a	POPTR_0012s01320.1|PACid:18229681	4.5	UUCUGAACUCUCUCCCUCAAC	AT5G15290.1		Uncharacterised protein family (UPF0497)	24.116	25	45
			oo|||||||||o|||||||o|
			CCGACUUGAGAAAGGGAGUGG
ptc-miR1446a	POPTR_0004s16950.1|PACid:18225203	5	UUCUGAACUCUCUCCCUCAAC	AT4G38960.1		B-box type zinc finger family protein	21.386	288	308
			oo||o||||||||o|||||||
			UUGAGUUGAGAGACGGAGUUG
ptc-miR1446a	POPTR_0015s02636.1|PACid:18233206	5	UUCUGAACUCUCUCCCUCAAC				18.785	535	555
			oo|..||o.||||||||||||
			UUGGUUUCGGAGAGGGAGUUG
ptc-miR1446a	POPTR_0001s00300.1|PACid:18236251	3	UUCUG-AACUCUCUCCCUCAAC	AT4G22580.1		Exostosin family protein	12.765	1137	1158
			||||.o||||||||||||||o|
			AAGAUAUUGAGAGAGGGAGUAG
ptc-miR1446a	POPTR_0003s11170.1|PACid:18217289	3	UUCUG-AACUCUCUCCCUCAAC	AT4G22580.1		Exostosin family protein	12.518	1164	1185
			||||.o||||||||||||||o|
			AAGAUAUUGAGAGAGGGAGUAG
ptc-miR1446a	POPTR_0007s03160.1|PACid:18242650	3.5	UUCUGAACU-CUCUCCCUCAAC	AT1G61000.1			16.757	621	642
			|||.|||||o||||||o|||||
			AAGGCUUGAGGAGAGGAAGUUG
ptc-miR1446a	POPTR_0001s25950.1|PACid:18238563	4.5	UUCUGAACUCUCUCCCUCAA	AT2G29970.1		Double Clp-miRX motif-containing P-loop nucleoside triphosphate hydrolases superfamily protein	18.253	2940	2959
			||||||||.|||||||oooo
			AAGACUUGGGAGAGGGUUGG
ptc-miR1446a	POPTR_0007s06470.1|PACid:18242991	4.5	UUCUGAACUCUCUCCCUCAA	AT1G34210.1	SERK2	somatic embryogenesis receptor-like kinase 2	14.343	12	31
			|.||.|||||||||||.ooo
			AGGAUUUGAGAGAGGGGAAG
ptc-miR1446a	POPTR_0005s23110.1|PACid:18206076	4	UUCUGAACUCUCUCCCUCAAC	AT3G63140.1	CSP41A	chloroplast stem-loop binding protein of 41 kDa	13.042	436	456
			o|||||||||||.o|o.||||
			CAGACUUGAGAGGAGUGGUUG
ptc-miR1446a	POPTR_0003s20120.1|PACid:18216241	3.5	UUCUGAACUCUCUCCCUCAA	AT4G30870.1	MUS81	Restriction endonuclease, type II-like superfamily protein	17.09	1300	1319
			|.||o||o||||||||.|||
			AGGAGUUUAGAGAGGGGGUU
ptc-miR1446b	POPTR_0012s09550.1|PACid:18229497	2.5	UUCUGAACUCUCUCCCUCAA	AT1G66350.1	RGL1	RGA-like 1	19.042	752	771
			oo||||||||||||||||||
			UUGACUUGAGAGAGGGAGUU
ptc-miR1446b	POPTR_0014s17680.1|PACid:18222934	2.5	UUCUGA-ACUCUCUCCCUCAA	AT5G27740.1	EMB2775	ATPase family associated with various cellular activities (AAA)	12.218	820	840
			||||||o||||||||||||||
			AAGACUAUGAGAGAGGGAGUU
ptc-miR1446b	POPTR_0013s09080.1|PACid:18221580	3.5	UUCUGAACUCUCUCCCUCAA	AT4G10150.1		RING/U-box superfamily protein	20.545	651	670
			|.|||||||||||||||oo|
			AGGACUUGAGAGAGGGAACU
ptc-miR1446b	POPTR_0006s04360.1|PACid:18211373	2	UUCUGAACUCUCUCCCUCAA	AT2G41450.1		N-acetyltransferases;N-acetyltransferases	15.534	475	494
			|||||||o|||||o||||||
			AAGACUUCAGAGAAGGAGUU
ptc-miR1446b	POPTR_0007s11250.1|PACid:18243419	3	UUCUGAACUCUCUCCCUCAAC	AT2G23440.1			15.709	67	87
			||||.|||||.o|||o|||||
			AAGAUUUGAGGAAGGAAGUUG
ptc-miR1446b	POPTR_0002s13620.1|PACid:18244351	3	UUCUGAACUCUCUCCCUCAAC	AT3G60190.1	DL1E	DYNAMIN-like 1E	19.947	130	150
			|.|||||||||o|||o.||||
			AGGACUUGAGACAGGUGGUUG
ptc-miR1446b	POPTR_0014s04310.1|PACid:18223115	3	UUCUGAACUCUCUCCCUCAAC	AT3G60190.1	DL1E	DYNAMIN-like 1E	20.44	130	150
			|.|||||||||o|||o.||||
			AGGACUUGAGACAGGUGGUUG
ptc-miR1446b	POPTR_0001s08550.1|PACid:18235007	3	UUCUGAACUCUCUCCCUCAA	AT1G62990.1	KNAT7	KNOTTED-like homeobox of Arabidopsis thaliana 7	15.322	589	608
			|o|.|||||||||||o||||
			ACGGCUUGAGAGAGGUAGUU
ptc-miR1446b	POPTR_0002s01670.1|PACid:18246983	3.5	UUCUGAACUCUCUCCCUCAAC	AT1G78610.1	MSL6	mechanosensitive channel of small conductance-like 6	19.273	417	437
			.||||||||o.o.||||||||
			GAGACUUGACGAGGGGAGUUG
ptc-miR1446b	POPTR_0015s10310.1|PACid:18232957	4.5	UUCUGAACUCUCUCCCUCAA	AT1G66350.1	RGL1	RGA-like 1	19.029	755	774
			oo|o.|||||||||||||||
			UUGUUUUGAGAGAGGGAGUU
ptc-miR1446b	POPTR_0009s12500.1|PACid:18227977	3.5	UUCUGAACUCUCUCCCUCAA				12.227	187	206
			|||||o|||||||||||o|o
			AAGACGUGAGAGAGGGAAUC
ptc-miR1446b	POPTR_0003s19870.1|PACid:18217847	3.5	UUCUGAACUCUCUCCCUCAAC	AT3G14460.1		LRR and NB-ARC domains-containing disease resistance protein	17.121	1206	1226
			|.|.|||o.||||||o|||||
			AGGGCUUUGGAGAGGAAGUUG
ptc-miR1446b	POPTR_0012s01320.1|PACid:18229681	4.5	UUCUGAACUCUCUCCCUCAAC	AT5G15290.1		Uncharacterised protein family (UPF0497)	24.116	25	45
			oo|||||||||o|||||||o|
			CCGACUUGAGAAAGGGAGUGG
ptc-miR1446b	POPTR_0004s16950.1|PACid:18225203	5	UUCUGAACUCUCUCCCUCAAC	AT4G38960.1		B-box type zinc finger family protein	21.386	288	308
			oo||o||||||||o|||||||
			UUGAGUUGAGAGACGGAGUUG
ptc-miR1446b	POPTR_0015s02636.1|PACid:18233206	5	UUCUGAACUCUCUCCCUCAAC				18.785	535	555
			oo|..||o.||||||||||||
			UUGGUUUCGGAGAGGGAGUUG
ptc-miR1446b	POPTR_0001s00300.1|PACid:18236251	3	UUCUG-AACUCUCUCCCUCAAC	AT4G22580.1		Exostosin family protein	12.765	1137	1158
			||||.o||||||||||||||o|
			AAGAUAUUGAGAGAGGGAGUAG
ptc-miR1446b	POPTR_0003s11170.1|PACid:18217289	3	UUCUG-AACUCUCUCCCUCAAC	AT4G22580.1		Exostosin family protein	12.518	1164	1185
			||||.o||||||||||||||o|
			AAGAUAUUGAGAGAGGGAGUAG
ptc-miR1446b	POPTR_0007s03160.1|PACid:18242650	3.5	UUCUGAACU-CUCUCCCUCAAC	AT1G61000.1			16.757	621	642
			|||.|||||o||||||o|||||
			AAGGCUUGAGGAGAGGAAGUUG
ptc-miR1446b	POPTR_0001s25950.1|PACid:18238563	4.5	UUCUGAACUCUCUCCCUCAA	AT2G29970.1		Double Clp-miRX motif-containing P-loop nucleoside triphosphate hydrolases superfamily protein	18.253	2940	2959
			||||||||.|||||||oooo
			AAGACUUGGGAGAGGGUUGG
ptc-miR1446b	POPTR_0007s06470.1|PACid:18242991	4.5	UUCUGAACUCUCUCCCUCAA	AT1G34210.1	SERK2	somatic embryogenesis receptor-like kinase 2	14.343	12	31
			|.||.|||||||||||.ooo
			AGGAUUUGAGAGAGGGGAAG
ptc-miR1446b	POPTR_0005s23110.1|PACid:18206076	4	UUCUGAACUCUCUCCCUCAAC	AT3G63140.1	CSP41A	chloroplast stem-loop binding protein of 41 kDa	13.042	436	456
			o|||||||||||.o|o.||||
			CAGACUUGAGAGGAGUGGUUG
ptc-miR1446b	POPTR_0003s20120.1|PACid:18216241	3.5	UUCUGAACUCUCUCCCUCAA	AT4G30870.1	MUS81	Restriction endonuclease, type II-like superfamily protein	17.09	1300	1319
			|.||o||o||||||||.|||
			AGGAGUUUAGAGAGGGGGUU
ptc-miR1446c	POPTR_0012s09550.1|PACid:18229497	2.5	UUCUGAACUCUCUCCCUCAA	AT1G66350.1	RGL1	RGA-like 1	19.042	752	771
			oo||||||||||||||||||
			UUGACUUGAGAGAGGGAGUU
ptc-miR1446c	POPTR_0014s17680.1|PACid:18222934	2.5	UUCUGA-ACUCUCUCCCUCAA	AT5G27740.1	EMB2775	ATPase family associated with various cellular activities (AAA)	12.218	820	840
			||||||o||||||||||||||
			AAGACUAUGAGAGAGGGAGUU
ptc-miR1446c	POPTR_0013s09080.1|PACid:18221580	3.5	UUCUGAACUCUCUCCCUCAA	AT4G10150.1		RING/U-box superfamily protein	20.545	651	670
			|.|||||||||||||||oo|
			AGGACUUGAGAGAGGGAACU
ptc-miR1446c	POPTR_0006s04360.1|PACid:18211373	2	UUCUGAACUCUCUCCCUCAA	AT2G41450.1		N-acetyltransferases;N-acetyltransferases	15.534	475	494
			|||||||o|||||o||||||
			AAGACUUCAGAGAAGGAGUU
ptc-miR1446c	POPTR_0007s11250.1|PACid:18243419	3	UUCUGAACUCUCUCCCUCAAC	AT2G23440.1			15.709	67	87
			||||.|||||.o|||o|||||
			AAGAUUUGAGGAAGGAAGUUG
ptc-miR1446c	POPTR_0002s13620.1|PACid:18244351	3	UUCUGAACUCUCUCCCUCAAC	AT3G60190.1	DL1E	DYNAMIN-like 1E	19.947	130	150
			|.|||||||||o|||o.||||
			AGGACUUGAGACAGGUGGUUG
ptc-miR1446c	POPTR_0014s04310.1|PACid:18223115	3	UUCUGAACUCUCUCCCUCAAC	AT3G60190.1	DL1E	DYNAMIN-like 1E	20.44	130	150
			|.|||||||||o|||o.||||
			AGGACUUGAGACAGGUGGUUG
ptc-miR1446c	POPTR_0001s08550.1|PACid:18235007	3	UUCUGAACUCUCUCCCUCAA	AT1G62990.1	KNAT7	KNOTTED-like homeobox of Arabidopsis thaliana 7	15.322	589	608
			|o|.|||||||||||o||||
			ACGGCUUGAGAGAGGUAGUU
ptc-miR1446c	POPTR_0002s01670.1|PACid:18246983	3.5	UUCUGAACUCUCUCCCUCAAC	AT1G78610.1	MSL6	mechanosensitive channel of small conductance-like 6	19.273	417	437
			.||||||||o.o.||||||||
			GAGACUUGACGAGGGGAGUUG
ptc-miR1446c	POPTR_0015s10310.1|PACid:18232957	4.5	UUCUGAACUCUCUCCCUCAA	AT1G66350.1	RGL1	RGA-like 1	19.029	755	774
			oo|o.|||||||||||||||
			UUGUUUUGAGAGAGGGAGUU
ptc-miR1446c	POPTR_0009s12500.1|PACid:18227977	3.5	UUCUGAACUCUCUCCCUCAA				12.227	187	206
			|||||o|||||||||||o|o
			AAGACGUGAGAGAGGGAAUC
ptc-miR1446c	POPTR_0003s19870.1|PACid:18217847	3.5	UUCUGAACUCUCUCCCUCAAC	AT3G14460.1		LRR and NB-ARC domains-containing disease resistance protein	17.121	1206	1226
			|.|.|||o.||||||o|||||
			AGGGCUUUGGAGAGGAAGUUG
ptc-miR1446c	POPTR_0012s01320.1|PACid:18229681	4.5	UUCUGAACUCUCUCCCUCAAC	AT5G15290.1		Uncharacterised protein family (UPF0497)	24.116	25	45
			oo|||||||||o|||||||o|
			CCGACUUGAGAAAGGGAGUGG
ptc-miR1446c	POPTR_0004s16950.1|PACid:18225203	5	UUCUGAACUCUCUCCCUCAAC	AT4G38960.1		B-box type zinc finger family protein	21.386	288	308
			oo||o||||||||o|||||||
			UUGAGUUGAGAGACGGAGUUG
ptc-miR1446c	POPTR_0015s02636.1|PACid:18233206	5	UUCUGAACUCUCUCCCUCAAC				18.785	535	555
			oo|..||o.||||||||||||
			UUGGUUUCGGAGAGGGAGUUG
ptc-miR1446c	POPTR_0001s00300.1|PACid:18236251	3	UUCUG-AACUCUCUCCCUCAAC	AT4G22580.1		Exostosin family protein	12.765	1137	1158
			||||.o||||||||||||||o|
			AAGAUAUUGAGAGAGGGAGUAG
ptc-miR1446c	POPTR_0003s11170.1|PACid:18217289	3	UUCUG-AACUCUCUCCCUCAAC	AT4G22580.1		Exostosin family protein	12.518	1164	1185
			||||.o||||||||||||||o|
			AAGAUAUUGAGAGAGGGAGUAG
ptc-miR1446c	POPTR_0007s03160.1|PACid:18242650	3.5	UUCUGAACU-CUCUCCCUCAAC	AT1G61000.1			16.757	621	642
			|||.|||||o||||||o|||||
			AAGGCUUGAGGAGAGGAAGUUG
ptc-miR1446c	POPTR_0001s25950.1|PACid:18238563	4.5	UUCUGAACUCUCUCCCUCAA	AT2G29970.1		Double Clp-miRX motif-containing P-loop nucleoside triphosphate hydrolases superfamily protein	18.253	2940	2959
			||||||||.|||||||oooo
			AAGACUUGGGAGAGGGUUGG
ptc-miR1446c	POPTR_0007s06470.1|PACid:18242991	4.5	UUCUGAACUCUCUCCCUCAA	AT1G34210.1	SERK2	somatic embryogenesis receptor-like kinase 2	14.343	12	31
			|.||.|||||||||||.ooo
			AGGAUUUGAGAGAGGGGAAG
ptc-miR1446c	POPTR_0005s23110.1|PACid:18206076	4	UUCUGAACUCUCUCCCUCAAC	AT3G63140.1	CSP41A	chloroplast stem-loop binding protein of 41 kDa	13.042	436	456
			o|||||||||||.o|o.||||
			CAGACUUGAGAGGAGUGGUUG
ptc-miR1446c	POPTR_0003s20120.1|PACid:18216241	3.5	UUCUGAACUCUCUCCCUCAA	AT4G30870.1	MUS81	Restriction endonuclease, type II-like superfamily protein	17.09	1300	1319
			|.||o||o||||||||.|||
			AGGAGUUUAGAGAGGGGGUU
ptc-miR1446e	POPTR_0012s09550.1|PACid:18229497	2.5	UUCUGAACUCUCUCCCUCAA	AT1G66350.1	RGL1	RGA-like 1	19.042	752	771
			oo||||||||||||||||||
			UUGACUUGAGAGAGGGAGUU
ptc-miR1446e	POPTR_0014s17680.1|PACid:18222934	2.5	UUCUGA-ACUCUCUCCCUCAA	AT5G27740.1	EMB2775	ATPase family associated with various cellular activities (AAA)	12.218	820	840
			||||||o||||||||||||||
			AAGACUAUGAGAGAGGGAGUU
ptc-miR1446e	POPTR_0013s09080.1|PACid:18221580	3.5	UUCUGAACUCUCUCCCUCAA	AT4G10150.1		RING/U-box superfamily protein	20.545	651	670
			|.|||||||||||||||oo|
			AGGACUUGAGAGAGGGAACU
ptc-miR1446e	POPTR_0006s04360.1|PACid:18211373	2	UUCUGAACUCUCUCCCUCAA	AT2G41450.1		N-acetyltransferases;N-acetyltransferases	15.534	475	494
			|||||||o|||||o||||||
			AAGACUUCAGAGAAGGAGUU
ptc-miR1446e	POPTR_0007s11250.1|PACid:18243419	3	UUCUGAACUCUCUCCCUCAAC	AT2G23440.1			15.709	67	87
			||||.|||||.o|||o|||||
			AAGAUUUGAGGAAGGAAGUUG
ptc-miR1446e	POPTR_0002s13620.1|PACid:18244351	3	UUCUGAACUCUCUCCCUCAAC	AT3G60190.1	DL1E	DYNAMIN-like 1E	19.947	130	150
			|.|||||||||o|||o.||||
			AGGACUUGAGACAGGUGGUUG
ptc-miR1446e	POPTR_0014s04310.1|PACid:18223115	3	UUCUGAACUCUCUCCCUCAAC	AT3G60190.1	DL1E	DYNAMIN-like 1E	20.44	130	150
			|.|||||||||o|||o.||||
			AGGACUUGAGACAGGUGGUUG
ptc-miR1446e	POPTR_0001s08550.1|PACid:18235007	3	UUCUGAACUCUCUCCCUCAA	AT1G62990.1	KNAT7	KNOTTED-like homeobox of Arabidopsis thaliana 7	15.322	589	608
			|o|.|||||||||||o||||
			ACGGCUUGAGAGAGGUAGUU
ptc-miR1446e	POPTR_0002s01670.1|PACid:18246983	3.5	UUCUGAACUCUCUCCCUCAAC	AT1G78610.1	MSL6	mechanosensitive channel of small conductance-like 6	19.273	417	437
			.||||||||o.o.||||||||
			GAGACUUGACGAGGGGAGUUG
ptc-miR1446e	POPTR_0015s10310.1|PACid:18232957	4.5	UUCUGAACUCUCUCCCUCAA	AT1G66350.1	RGL1	RGA-like 1	19.029	755	774
			oo|o.|||||||||||||||
			UUGUUUUGAGAGAGGGAGUU
ptc-miR1446e	POPTR_0009s12500.1|PACid:18227977	3.5	UUCUGAACUCUCUCCCUCAA				12.227	187	206
			|||||o|||||||||||o|o
			AAGACGUGAGAGAGGGAAUC
ptc-miR1446e	POPTR_0003s19870.1|PACid:18217847	3.5	UUCUGAACUCUCUCCCUCAAC	AT3G14460.1		LRR and NB-ARC domains-containing disease resistance protein	17.121	1206	1226
			|.|.|||o.||||||o|||||
			AGGGCUUUGGAGAGGAAGUUG
ptc-miR1446e	POPTR_0012s01320.1|PACid:18229681	4.5	UUCUGAACUCUCUCCCUCAAC	AT5G15290.1		Uncharacterised protein family (UPF0497)	24.116	25	45
			oo|||||||||o|||||||o|
			CCGACUUGAGAAAGGGAGUGG
ptc-miR1446e	POPTR_0004s16950.1|PACid:18225203	5	UUCUGAACUCUCUCCCUCAAC	AT4G38960.1		B-box type zinc finger family protein	21.386	288	308
			oo||o||||||||o|||||||
			UUGAGUUGAGAGACGGAGUUG
ptc-miR1446e	POPTR_0015s02636.1|PACid:18233206	5	UUCUGAACUCUCUCCCUCAAC				18.785	535	555
			oo|..||o.||||||||||||
			UUGGUUUCGGAGAGGGAGUUG
ptc-miR1446e	POPTR_0001s00300.1|PACid:18236251	3	UUCUG-AACUCUCUCCCUCAAC	AT4G22580.1		Exostosin family protein	12.765	1137	1158
			||||.o||||||||||||||o|
			AAGAUAUUGAGAGAGGGAGUAG
ptc-miR1446e	POPTR_0003s11170.1|PACid:18217289	3	UUCUG-AACUCUCUCCCUCAAC	AT4G22580.1		Exostosin family protein	12.518	1164	1185
			||||.o||||||||||||||o|
			AAGAUAUUGAGAGAGGGAGUAG
ptc-miR1446e	POPTR_0007s03160.1|PACid:18242650	3.5	UUCUGAACU-CUCUCCCUCAAC	AT1G61000.1			16.757	621	642
			|||.|||||o||||||o|||||
			AAGGCUUGAGGAGAGGAAGUUG
ptc-miR1446e	POPTR_0001s25950.1|PACid:18238563	4.5	UUCUGAACUCUCUCCCUCAA	AT2G29970.1		Double Clp-miRX motif-containing P-loop nucleoside triphosphate hydrolases superfamily protein	18.253	2940	2959
			||||||||.|||||||oooo
			AAGACUUGGGAGAGGGUUGG
ptc-miR1446e	POPTR_0007s06470.1|PACid:18242991	4.5	UUCUGAACUCUCUCCCUCAA	AT1G34210.1	SERK2	somatic embryogenesis receptor-like kinase 2	14.343	12	31
			|.||.|||||||||||.ooo
			AGGAUUUGAGAGAGGGGAAG
ptc-miR1446e	POPTR_0005s23110.1|PACid:18206076	4	UUCUGAACUCUCUCCCUCAAC	AT3G63140.1	CSP41A	chloroplast stem-loop binding protein of 41 kDa	13.042	436	456
			o|||||||||||.o|o.||||
			CAGACUUGAGAGGAGUGGUUG
ptc-miR1446e	POPTR_0003s20120.1|PACid:18216241	3.5	UUCUGAACUCUCUCCCUCAA	AT4G30870.1	MUS81	Restriction endonuclease, type II-like superfamily protein	17.09	1300	1319
			|.||o||o||||||||.|||
			AGGAGUUUAGAGAGGGGGUU
ptc-miR1447	POPTR_0019s13730.1|PACid:18218574	2	CAGAAUUGCAGUGCCUUGAUU	AT4G03500.1		Ankyrin repeat family protein	15.877	577	597
			o||||||||||||||||o|||
			UUCUUAACGUCACGGAAGUAA
ptc-miR1447	POPTR_0063s00260.1|PACid:18215836	2	CAGAAUUGCAGUGCCUUGAUU	AT4G03470.1		Ankyrin repeat family protein	16.374	850	870
			o||||||||||||||||o|||
			UUCUUAACGUCACGGAAGUAA
ptc-miR1447	POPTR_0019s13670.1|PACid:18219121	2	CAGAAUUGCAGUGCCUUGAUU	AT4G03500.1		Ankyrin repeat family protein	23.898	1303	1323
			o||||||||||||||||o|||
			UUCUUAACGUCACGGAAGUAA
ptc-miR1447	POPTR_0015s04680.1|PACid:18233853	4	CAGAAUUGCAGUGCCUUGAUU	AT3G47570.1		Leucine-rich repeat protein kinase family protein	17.595	1977	1997
			ooo||||||||||||||||||
			ACGUUAACGUCACGGAACUAA
ptc-miR1447	POPTR_0019s13690.1|PACid:18219190	2.5	CAGAAUUGCAGUGCCUUGAUU	AT4G03500.1		Ankyrin repeat family protein	17.757	1447	1467
			o|.||||||||||||||o|||
			AUUUUAACGUCACGGAAGUAA
ptc-miR1447	POPTR_0019s13720.1|PACid:18219592	2.5	CAGAAUUGCAGUGCCUUGAUU	AT4G03460.1		Ankyrin repeat family protein	19.256	148	168
			o|||||||||||||||.|o|.
			AUCUUAACGUCACGGAGCCAG
ptc-miR1447	POPTR_0045s00220.1|PACid:18222193	2.5	CAGAAUUGCAGUGCCUUGAUU	AT4G03480.1		Ankyrin repeat family protein	22.008	757	777
			o||||.||||||||||||o|.
			UUCUUGACGUCACGGAACAAG
ptc-miR1447	POPTR_0045s00270.1|PACid:18222191	2.5	CAGAAUUGCAGUGCCUUGAUU	AT4G03450.1		Ankyrin repeat family protein	24.168	184	204
			o||||.||||||||||||o|.
			UUCUUGACGUCACGGAACAAG
ptc-miR1447	POPTR_0045s00270.1|PACid:18222191	2.5	CAGAAUUGCAGUGCCUUGAUU	AT4G03450.1		Ankyrin repeat family protein	24.168	1021	1041
			o||||.||||||||||||o|.
			UUCUUGACGUCACGGAACAAG
ptc-miR1447	POPTR_0013s07430.1|PACid:18221357	3	CAGAAUUGCAGUGCCUUGAUU	AT4G27620.1			17.985	187	207
			||||o|||||.||||||o|||
			GUCUAAACGUUACGGAAGUAA
ptc-miR1447	POPTR_0006s09860.1|PACid:18212846	3	CAGAAUUGCAGUGCCUUGAUU	AT2G38090.1		Duplicated homeodomain-like superfamily protein	21.606	4	24
			|||||||o||.|.||..||||
			GUCUUAAGGUUAUGGGGCUAA
ptc-miR1447	POPTR_0006s24400.1|PACid:18213127	2.5	CAGAAUUGCAGUGCCUUGAUU	AT3G13790.2	ATBFRUCT1	Glycosyl hydrolases family 32 protein	11.798	613	633
			|||||||||o.|o||||||||
			GUCUUAACGGUAAGGAACUAA
ptc-miR1447	POPTR_0954s00200.1|PACid:18247120	3	CAGAAUUGCAGUGCCUUGAUU	AT4G03500.1		Ankyrin repeat family protein	22.105	217	237
			o||||||||o|||||||o|||
			AUCUUAACGCCACGGAAGUAA
ptc-miR1447	POPTR_0063s00230.1|PACid:18215842	3	CAGAAUUGCAGUGCCUUGAUU	AT5G02620.1	ANK1	ankyrin-like1	19.445	895	915
			o|||||.|||||||||.|o|.
			AUCUUAGCGUCACGGAGCCAG
ptc-miR1447	POPTR_0063s00250.1|PACid:18215844	3	CAGAAUUGCAGUGCCUUGAUU	AT4G03500.1		Ankyrin repeat family protein	19.731	1003	1023
			o|||||.|||||||||.|o|.
			AUCUUAGCGUCACGGAGCCAG
ptc-miR1447	POPTR_0019s13790.1|PACid:18218905	3	CAGAAUUGCAGUGCCUUGAUU	AT4G03500.1		Ankyrin repeat family protein	19.29	1393	1413
			o||||.||||.|||||||o|.
			UUCUUGACGUUACGGAACAAG
ptc-miR1447	POPTR_0010s18300.2|PACid:18240096	3	CAGAAUUGCAGUGCCUUGAU	AT1G79270.1	ECT8	evolutionarily conserved C-terminal region 8	15.664	1583	1602
			|||||||o||.|.||||||o
			GUCUUAAAGUUAUGGAACUC
ptc-miR1447	POPTR_0010s18300.1|PACid:18240094	3	CAGAAUUGCAGUGCCUUGAU	AT1G79270.1	ECT8	evolutionarily conserved C-terminal region 8	15.664	1583	1602
			|||||||o||.|.||||||o
			GUCUUAAAGUUAUGGAACUC
ptc-miR1447	POPTR_0010s18300.3|PACid:18240095	3	CAGAAUUGCAGUGCCUUGAU	AT1G79270.1	ECT8	evolutionarily conserved C-terminal region 8	15.664	1583	1602
			|||||||o||.|.||||||o
			GUCUUAAAGUUAUGGAACUC
ptc-miR1447	POPTR_0007s10120.1|PACid:18243634	2.5	CAGAAUUGCAGUGCCUUGAU	AT4G33910.1		2-oxoglutarate (2OG) and Fe(II)-dependent oxygenase superfamily protein	17.348	224	243
			||||||||||o.o|||||||
			GUCUUAACGUAGGGGAACUA
ptc-miR1447	POPTR_0010s01700.1|PACid:18240619	3.5	CAGAAUUGCAGUGCCUUGAUU	AT3G16640.1	TCTP	translationally controlled tumor protein	22.595	372	392
			o|||||||||.oo||||||||
			UUCUUAACGUUCAGGAACUAA
ptc-miR1447	POPTR_0012s15020.1|PACid:18229131	3.5	CAGAAUUGCAGUGCCUUGAUU	AT3G14470.1		NB-ARC domain-containing disease resistance protein	17.33	245	265
			o|||||||||||||o|.o|||
			UUCUUAACGUCACGAAGGUAA
ptc-miR1447	POPTR_0010s01770.1|PACid:18242336	3.5	CAGAAUUGCAGUGCCUUGAUU	AT4G15840.1		BTB/POZ domain-containing protein	16.93	581	601
			o|||||||||.|o|||o||||
			CUCUUAACGUUAAGGAUCUAA
ptc-miR1447	POPTR_0001s01450.1|PACid:18237422	4	CAGAAUUGCAGUGCCUUGAUU	AT1G75950.1	SKP1	S phase kinase-associated protein 1	16.01	165	185
			|||o||||||.|.|||||o.|
			GUCAUAACGUUAUGGAACCGA
ptc-miR1447	POPTR_0016s13290.1|PACid:18250466	4	CAGAAUUGCAGUGCCUUGAUU	AT5G07090.1		Ribosomal protein S4 (RPS4A) family protein	18.865	67	87
			||.|||o|||.||||||o|.|
			GUUUUAUCGUUACGGAAGUGA
ptc-miR156a	POPTR_0015s07140.1|PACid:18232622	0.5	UGACAGAAGAGAGUGAGCAC	AT1G69170.1		Squamosa promoter-binding protein-like (SBP domain) transcription factor family protein	18.114	1238	1257
			|||||||||||||.||||||
			ACUGUCUUCUCUCGCUCGUG
ptc-miR156a	POPTR_0010s16400.1|PACid:18242283	1	UGACAGAAGAGAGUGAGCAC	AT1G69170.1		Squamosa promoter-binding protein-like (SBP domain) transcription factor family protein	21.097	1175	1194
			|||||||||||||o||||||
			ACUGUCUUCUCUCUCUCGUG
ptc-miR156a	POPTR_0008s09750.1|PACid:18247435	1	UGACAGAAGAGAGUGAGCAC	AT1G69170.1		Squamosa promoter-binding protein-like (SBP domain) transcription factor family protein	21.579	1088	1107
			|||||||||||||o||||||
			ACUGUCUUCUCUCUCUCGUG
ptc-miR156a	POPTR_0003s17120.1|PACid:18217293	1	UGACAGAAGAGAGUGAGCAC	AT5G43270.1	SPL2	squamosa promoter binding protein-like 2	9.239	1169	1188
			|||||||||||||o||||||
			ACUGUCUUCUCUCUCUCGUG
ptc-miR156a	POPTR_0018s14680.2|PACid:18215571	1	UGACAGAAGAGAGUGAGCAC	AT5G43270.1	SPL2	squamosa promoter binding protein-like 2	20.138	1127	1146
			|||||||||||||o||||||
			ACUGUCUUCUCUCUCUCGUG
ptc-miR156a	POPTR_0018s14680.1|PACid:18215570	1	UGACAGAAGAGAGUGAGCAC	AT5G43270.1	SPL2	squamosa promoter binding protein-like 2	20.138	1127	1146
			|||||||||||||o||||||
			ACUGUCUUCUCUCUCUCGUG
ptc-miR156a	POPTR_0018s14680.3|PACid:18215572	1	UGACAGAAGAGAGUGAGCAC	AT5G43270.1	SPL2	squamosa promoter binding protein-like 2	20.138	1127	1146
			|||||||||||||o||||||
			ACUGUCUUCUCUCUCUCGUG
ptc-miR156a	POPTR_0001s13890.1|PACid:18239288	1	UGACAGAAGAGAGUGAGCAC	AT5G43270.1	SPL2	squamosa promoter binding protein-like 2	14.052	1106	1125
			|||||||||||||o||||||
			ACUGUCUUCUCUCUCUCGUG
ptc-miR156a	POPTR_0014s05690.1|PACid:18223901	1	UGACAGAAGAGAGUGAGCAC	AT1G27370.1	SPL10	squamosa promoter binding protein-like 10	15.354	830	849
			|||||||||||||o||||||
			ACUGUCUUCUCUCUCUCGUG
ptc-miR156a	POPTR_0002s14330.1|PACid:18244437	1	UGACAGAAGAGAGUGAGCAC	AT1G27360.1	SPL11	squamosa promoter-like 11	15.86	809	828
			|||||||||||||o||||||
			ACUGUCUUCUCUCUCUCGUG
ptc-miR156a	POPTR_0015s11100.1|PACid:18232812	1	UGACAGAAGAGAGUGAGCAC	AT5G50670.1	SPL13B	Squamosa promoter-binding protein-like (SBP domain) transcription factor family protein	14.776	899	918
			|||||||||||||o||||||
			ACUGUCUUCUCUCUCUCGUG
ptc-miR156a	POPTR_0001s13630.1|PACid:18234979	1	UGACAGAAGAGAGUGAGCAC	AT5G50670.1	SPL13B	Squamosa promoter-binding protein-like (SBP domain) transcription factor family protein	12.661	857	876
			|||||||||||||o||||||
			ACUGUCUUCUCUCUCUCGUG
ptc-miR156a	POPTR_0003s16780.1|PACid:18216841	1	UGACAGAAGAGAGUGAGCAC	AT5G50670.1	SPL13B	Squamosa promoter-binding protein-like (SBP domain) transcription factor family protein	12.612	668	687
			|||||||||||||o||||||
			ACUGUCUUCUCUCUCUCGUG
ptc-miR156a	POPTR_0016s04890.1|PACid:18249881	1	UGACAGAAGAGAGUGAGCAC	AT2G42200.1	SPL9	squamosa promoter binding protein-like 9	17.571	425	444
			|||||||||||||o||||||
			ACUGUCUUCUCUCUCUCGUG
ptc-miR156a	POPTR_0011s05490.1|PACid:18232063	2	UGACAGAAGAGAGUGAGCAC				12.946	193	212
			|||||||||||||o|||||o
			ACUGUCUUCUCUCUCUCGUA
ptc-miR156a	POPTR_0012s10260.1|PACid:18229814	2	UGACAGAAGAGAGUGAGCAC	AT5G50670.1	SPL13B	Squamosa promoter-binding protein-like (SBP domain) transcription factor family protein	15.102	949	968
			|||||||||||||o||||o|
			ACUGUCUUCUCUCUCUCGCG
ptc-miR156a	POPTR_0001s34380.1|PACid:18237630	3.5	UGACAGAAGAGAGUGAGCAC	AT5G46420.1		16S rRNA processing protein RimM family	21.134	1611	1630
			||||||||||.||..|||oo
			ACUGUCUUCUUUCGUUCGAU
ptc-miR156a	POPTR_0013s11750.1|PACid:18220764	3	UGACAGAAGAGAGUGAGCAC	AT1G65280.1		DNAJ heat shock N-terminal domain-containing protein	18.825	824	843
			||||||||||o|||.|.||o
			ACUGUCUUCUGUCAUUUGUC
ptc-miR156a	POPTR_0005s14760.1|PACid:18208221	4	UGACAGAAGAGAGUGAGCAC	AT4G18950.1		Integrin-linked protein kinase family	15.745	1044	1063
			||||||||||.|.||||oo|
			ACUGUCUUCUUUUACUCCCG
ptc-miR156a	POPTR_0009s07740.1|PACid:18228518	4	UGACAGAAGAGAGUGAGCAC	AT3G11130.1		Clathrin, heavy chain	16.342	2513	2532
			||o|||||||||..||.||o
			ACCGUCUUCUCUUGCUUGUC
ptc-miR156a	POPTR_0019s01620.1|PACid:18219741	4.5	UGACAGAAGAGAGUGAGCAC	AT1G15190.1		Fasciclin-like arabinogalactan family protein	6.381	232	251
			o|||||||||||||||.ooo
			CCUGUCUUCUCUCACUUCCA
ptc-miR156a	POPTR_0879s00210.1|PACid:18228914	4.5	UGACAGAAGAGAGUGAGCAC	AT1G15190.1		Fasciclin-like arabinogalactan family protein	6.603	214	233
			o|||||||||||||||.ooo
			CCUGUCUUCUCUCACUUCCA
ptc-miR156a	POPTR_0010s06270.1|PACid:18241911	4.5	UGACAGAAGAGAGUGAGCAC	AT1G67720.1		Leucine-rich repeat protein kinase family protein	17.336	1011	1030
			|||||.||||||.|||.ooo
			ACUGUUUUCUCUUACUUUCC
ptc-miR156a	POPTR_0002s07970.1|PACid:18246002	3.5	UGACAGAAGAGAGUGAGCAC	AT1G77380.1	AAP3	amino acid permease 3	20.272	219	238
			|||||.||||||...|.o||
			ACUGUUUUCUCUUGUUUUUG
ptc-miR156a	POPTR_0014s04170.1|PACid:18223645	3	UGACAGAAGAGAGUGAGCAC	AT1G80950.1		Phospholipid/glycerol acyltransferase family protein	14.972	970	989
			||||||||.|||oo||.|||
			ACUGUCUUUUCUAUCUUGUG
ptc-miR156b	POPTR_0015s07140.1|PACid:18232622	0.5	UGACAGAAGAGAGUGAGCAC	AT1G69170.1		Squamosa promoter-binding protein-like (SBP domain) transcription factor family protein	18.114	1238	1257
			|||||||||||||.||||||
			ACUGUCUUCUCUCGCUCGUG
ptc-miR156b	POPTR_0010s16400.1|PACid:18242283	1	UGACAGAAGAGAGUGAGCAC	AT1G69170.1		Squamosa promoter-binding protein-like (SBP domain) transcription factor family protein	21.097	1175	1194
			|||||||||||||o||||||
			ACUGUCUUCUCUCUCUCGUG
ptc-miR156b	POPTR_0008s09750.1|PACid:18247435	1	UGACAGAAGAGAGUGAGCAC	AT1G69170.1		Squamosa promoter-binding protein-like (SBP domain) transcription factor family protein	21.579	1088	1107
			|||||||||||||o||||||
			ACUGUCUUCUCUCUCUCGUG
ptc-miR156b	POPTR_0003s17120.1|PACid:18217293	1	UGACAGAAGAGAGUGAGCAC	AT5G43270.1	SPL2	squamosa promoter binding protein-like 2	9.239	1169	1188
			|||||||||||||o||||||
			ACUGUCUUCUCUCUCUCGUG
ptc-miR156b	POPTR_0018s14680.2|PACid:18215571	1	UGACAGAAGAGAGUGAGCAC	AT5G43270.1	SPL2	squamosa promoter binding protein-like 2	20.138	1127	1146
			|||||||||||||o||||||
			ACUGUCUUCUCUCUCUCGUG
ptc-miR156b	POPTR_0018s14680.1|PACid:18215570	1	UGACAGAAGAGAGUGAGCAC	AT5G43270.1	SPL2	squamosa promoter binding protein-like 2	20.138	1127	1146
			|||||||||||||o||||||
			ACUGUCUUCUCUCUCUCGUG
ptc-miR156b	POPTR_0018s14680.3|PACid:18215572	1	UGACAGAAGAGAGUGAGCAC	AT5G43270.1	SPL2	squamosa promoter binding protein-like 2	20.138	1127	1146
			|||||||||||||o||||||
			ACUGUCUUCUCUCUCUCGUG
ptc-miR156b	POPTR_0001s13890.1|PACid:18239288	1	UGACAGAAGAGAGUGAGCAC	AT5G43270.1	SPL2	squamosa promoter binding protein-like 2	14.052	1106	1125
			|||||||||||||o||||||
			ACUGUCUUCUCUCUCUCGUG
ptc-miR156b	POPTR_0014s05690.1|PACid:18223901	1	UGACAGAAGAGAGUGAGCAC	AT1G27370.1	SPL10	squamosa promoter binding protein-like 10	15.354	830	849
			|||||||||||||o||||||
			ACUGUCUUCUCUCUCUCGUG
ptc-miR156b	POPTR_0002s14330.1|PACid:18244437	1	UGACAGAAGAGAGUGAGCAC	AT1G27360.1	SPL11	squamosa promoter-like 11	15.86	809	828
			|||||||||||||o||||||
			ACUGUCUUCUCUCUCUCGUG
ptc-miR156b	POPTR_0015s11100.1|PACid:18232812	1	UGACAGAAGAGAGUGAGCAC	AT5G50670.1	SPL13B	Squamosa promoter-binding protein-like (SBP domain) transcription factor family protein	14.776	899	918
			|||||||||||||o||||||
			ACUGUCUUCUCUCUCUCGUG
ptc-miR156b	POPTR_0001s13630.1|PACid:18234979	1	UGACAGAAGAGAGUGAGCAC	AT5G50670.1	SPL13B	Squamosa promoter-binding protein-like (SBP domain) transcription factor family protein	12.661	857	876
			|||||||||||||o||||||
			ACUGUCUUCUCUCUCUCGUG
ptc-miR156b	POPTR_0003s16780.1|PACid:18216841	1	UGACAGAAGAGAGUGAGCAC	AT5G50670.1	SPL13B	Squamosa promoter-binding protein-like (SBP domain) transcription factor family protein	12.612	668	687
			|||||||||||||o||||||
			ACUGUCUUCUCUCUCUCGUG
ptc-miR156b	POPTR_0016s04890.1|PACid:18249881	1	UGACAGAAGAGAGUGAGCAC	AT2G42200.1	SPL9	squamosa promoter binding protein-like 9	17.571	425	444
			|||||||||||||o||||||
			ACUGUCUUCUCUCUCUCGUG
ptc-miR156b	POPTR_0011s05490.1|PACid:18232063	2	UGACAGAAGAGAGUGAGCAC				12.946	193	212
			|||||||||||||o|||||o
			ACUGUCUUCUCUCUCUCGUA
ptc-miR156b	POPTR_0012s10260.1|PACid:18229814	2	UGACAGAAGAGAGUGAGCAC	AT5G50670.1	SPL13B	Squamosa promoter-binding protein-like (SBP domain) transcription factor family protein	15.102	949	968
			|||||||||||||o||||o|
			ACUGUCUUCUCUCUCUCGCG
ptc-miR156b	POPTR_0001s34380.1|PACid:18237630	3.5	UGACAGAAGAGAGUGAGCAC	AT5G46420.1		16S rRNA processing protein RimM family	21.134	1611	1630
			||||||||||.||..|||oo
			ACUGUCUUCUUUCGUUCGAU
ptc-miR156b	POPTR_0013s11750.1|PACid:18220764	3	UGACAGAAGAGAGUGAGCAC	AT1G65280.1		DNAJ heat shock N-terminal domain-containing protein	18.825	824	843
			||||||||||o|||.|.||o
			ACUGUCUUCUGUCAUUUGUC
ptc-miR156b	POPTR_0005s14760.1|PACid:18208221	4	UGACAGAAGAGAGUGAGCAC	AT4G18950.1		Integrin-linked protein kinase family	15.745	1044	1063
			||||||||||.|.||||oo|
			ACUGUCUUCUUUUACUCCCG
ptc-miR156b	POPTR_0009s07740.1|PACid:18228518	4	UGACAGAAGAGAGUGAGCAC	AT3G11130.1		Clathrin, heavy chain	16.342	2513	2532
			||o|||||||||..||.||o
			ACCGUCUUCUCUUGCUUGUC
ptc-miR156b	POPTR_0019s01620.1|PACid:18219741	4.5	UGACAGAAGAGAGUGAGCAC	AT1G15190.1		Fasciclin-like arabinogalactan family protein	6.381	232	251
			o|||||||||||||||.ooo
			CCUGUCUUCUCUCACUUCCA
ptc-miR156b	POPTR_0879s00210.1|PACid:18228914	4.5	UGACAGAAGAGAGUGAGCAC	AT1G15190.1		Fasciclin-like arabinogalactan family protein	6.603	214	233
			o|||||||||||||||.ooo
			CCUGUCUUCUCUCACUUCCA
ptc-miR156b	POPTR_0010s06270.1|PACid:18241911	4.5	UGACAGAAGAGAGUGAGCAC	AT1G67720.1		Leucine-rich repeat protein kinase family protein	17.336	1011	1030
			|||||.||||||.|||.ooo
			ACUGUUUUCUCUUACUUUCC
ptc-miR156b	POPTR_0002s07970.1|PACid:18246002	3.5	UGACAGAAGAGAGUGAGCAC	AT1G77380.1	AAP3	amino acid permease 3	20.272	219	238
			|||||.||||||...|.o||
			ACUGUUUUCUCUUGUUUUUG
ptc-miR156b	POPTR_0014s04170.1|PACid:18223645	3	UGACAGAAGAGAGUGAGCAC	AT1G80950.1		Phospholipid/glycerol acyltransferase family protein	14.972	970	989
			||||||||.|||oo||.|||
			ACUGUCUUUUCUAUCUUGUG
ptc-miR156c	POPTR_0015s07140.1|PACid:18232622	0.5	UGACAGAAGAGAGUGAGCAC	AT1G69170.1		Squamosa promoter-binding protein-like (SBP domain) transcription factor family protein	18.114	1238	1257
			|||||||||||||.||||||
			ACUGUCUUCUCUCGCUCGUG
ptc-miR156c	POPTR_0010s16400.1|PACid:18242283	1	UGACAGAAGAGAGUGAGCAC	AT1G69170.1		Squamosa promoter-binding protein-like (SBP domain) transcription factor family protein	21.097	1175	1194
			|||||||||||||o||||||
			ACUGUCUUCUCUCUCUCGUG
ptc-miR156c	POPTR_0008s09750.1|PACid:18247435	1	UGACAGAAGAGAGUGAGCAC	AT1G69170.1		Squamosa promoter-binding protein-like (SBP domain) transcription factor family protein	21.579	1088	1107
			|||||||||||||o||||||
			ACUGUCUUCUCUCUCUCGUG
ptc-miR156c	POPTR_0003s17120.1|PACid:18217293	1	UGACAGAAGAGAGUGAGCAC	AT5G43270.1	SPL2	squamosa promoter binding protein-like 2	9.239	1169	1188
			|||||||||||||o||||||
			ACUGUCUUCUCUCUCUCGUG
ptc-miR156c	POPTR_0018s14680.2|PACid:18215571	1	UGACAGAAGAGAGUGAGCAC	AT5G43270.1	SPL2	squamosa promoter binding protein-like 2	20.138	1127	1146
			|||||||||||||o||||||
			ACUGUCUUCUCUCUCUCGUG
ptc-miR156c	POPTR_0018s14680.1|PACid:18215570	1	UGACAGAAGAGAGUGAGCAC	AT5G43270.1	SPL2	squamosa promoter binding protein-like 2	20.138	1127	1146
			|||||||||||||o||||||
			ACUGUCUUCUCUCUCUCGUG
ptc-miR156c	POPTR_0018s14680.3|PACid:18215572	1	UGACAGAAGAGAGUGAGCAC	AT5G43270.1	SPL2	squamosa promoter binding protein-like 2	20.138	1127	1146
			|||||||||||||o||||||
			ACUGUCUUCUCUCUCUCGUG
ptc-miR156c	POPTR_0001s13890.1|PACid:18239288	1	UGACAGAAGAGAGUGAGCAC	AT5G43270.1	SPL2	squamosa promoter binding protein-like 2	14.052	1106	1125
			|||||||||||||o||||||
			ACUGUCUUCUCUCUCUCGUG
ptc-miR156c	POPTR_0014s05690.1|PACid:18223901	1	UGACAGAAGAGAGUGAGCAC	AT1G27370.1	SPL10	squamosa promoter binding protein-like 10	15.354	830	849
			|||||||||||||o||||||
			ACUGUCUUCUCUCUCUCGUG
ptc-miR156c	POPTR_0002s14330.1|PACid:18244437	1	UGACAGAAGAGAGUGAGCAC	AT1G27360.1	SPL11	squamosa promoter-like 11	15.86	809	828
			|||||||||||||o||||||
			ACUGUCUUCUCUCUCUCGUG
ptc-miR156c	POPTR_0015s11100.1|PACid:18232812	1	UGACAGAAGAGAGUGAGCAC	AT5G50670.1	SPL13B	Squamosa promoter-binding protein-like (SBP domain) transcription factor family protein	14.776	899	918
			|||||||||||||o||||||
			ACUGUCUUCUCUCUCUCGUG
ptc-miR156c	POPTR_0001s13630.1|PACid:18234979	1	UGACAGAAGAGAGUGAGCAC	AT5G50670.1	SPL13B	Squamosa promoter-binding protein-like (SBP domain) transcription factor family protein	12.661	857	876
			|||||||||||||o||||||
			ACUGUCUUCUCUCUCUCGUG
ptc-miR156c	POPTR_0003s16780.1|PACid:18216841	1	UGACAGAAGAGAGUGAGCAC	AT5G50670.1	SPL13B	Squamosa promoter-binding protein-like (SBP domain) transcription factor family protein	12.612	668	687
			|||||||||||||o||||||
			ACUGUCUUCUCUCUCUCGUG
ptc-miR156c	POPTR_0016s04890.1|PACid:18249881	1	UGACAGAAGAGAGUGAGCAC	AT2G42200.1	SPL9	squamosa promoter binding protein-like 9	17.571	425	444
			|||||||||||||o||||||
			ACUGUCUUCUCUCUCUCGUG
ptc-miR156c	POPTR_0011s05490.1|PACid:18232063	2	UGACAGAAGAGAGUGAGCAC				12.946	193	212
			|||||||||||||o|||||o
			ACUGUCUUCUCUCUCUCGUA
ptc-miR156c	POPTR_0012s10260.1|PACid:18229814	2	UGACAGAAGAGAGUGAGCAC	AT5G50670.1	SPL13B	Squamosa promoter-binding protein-like (SBP domain) transcription factor family protein	15.102	949	968
			|||||||||||||o||||o|
			ACUGUCUUCUCUCUCUCGCG
ptc-miR156c	POPTR_0001s34380.1|PACid:18237630	3.5	UGACAGAAGAGAGUGAGCAC	AT5G46420.1		16S rRNA processing protein RimM family	21.134	1611	1630
			||||||||||.||..|||oo
			ACUGUCUUCUUUCGUUCGAU
ptc-miR156c	POPTR_0013s11750.1|PACid:18220764	3	UGACAGAAGAGAGUGAGCAC	AT1G65280.1		DNAJ heat shock N-terminal domain-containing protein	18.825	824	843
			||||||||||o|||.|.||o
			ACUGUCUUCUGUCAUUUGUC
ptc-miR156c	POPTR_0005s14760.1|PACid:18208221	4	UGACAGAAGAGAGUGAGCAC	AT4G18950.1		Integrin-linked protein kinase family	15.745	1044	1063
			||||||||||.|.||||oo|
			ACUGUCUUCUUUUACUCCCG
ptc-miR156c	POPTR_0009s07740.1|PACid:18228518	4	UGACAGAAGAGAGUGAGCAC	AT3G11130.1		Clathrin, heavy chain	16.342	2513	2532
			||o|||||||||..||.||o
			ACCGUCUUCUCUUGCUUGUC
ptc-miR156c	POPTR_0019s01620.1|PACid:18219741	4.5	UGACAGAAGAGAGUGAGCAC	AT1G15190.1		Fasciclin-like arabinogalactan family protein	6.381	232	251
			o|||||||||||||||.ooo
			CCUGUCUUCUCUCACUUCCA
ptc-miR156c	POPTR_0879s00210.1|PACid:18228914	4.5	UGACAGAAGAGAGUGAGCAC	AT1G15190.1		Fasciclin-like arabinogalactan family protein	6.603	214	233
			o|||||||||||||||.ooo
			CCUGUCUUCUCUCACUUCCA
ptc-miR156c	POPTR_0010s06270.1|PACid:18241911	4.5	UGACAGAAGAGAGUGAGCAC	AT1G67720.1		Leucine-rich repeat protein kinase family protein	17.336	1011	1030
			|||||.||||||.|||.ooo
			ACUGUUUUCUCUUACUUUCC
ptc-miR156c	POPTR_0002s07970.1|PACid:18246002	3.5	UGACAGAAGAGAGUGAGCAC	AT1G77380.1	AAP3	amino acid permease 3	20.272	219	238
			|||||.||||||...|.o||
			ACUGUUUUCUCUUGUUUUUG
ptc-miR156c	POPTR_0014s04170.1|PACid:18223645	3	UGACAGAAGAGAGUGAGCAC	AT1G80950.1		Phospholipid/glycerol acyltransferase family protein	14.972	970	989
			||||||||.|||oo||.|||
			ACUGUCUUUUCUAUCUUGUG
ptc-miR156d	POPTR_0015s07140.1|PACid:18232622	0.5	UGACAGAAGAGAGUGAGCAC	AT1G69170.1		Squamosa promoter-binding protein-like (SBP domain) transcription factor family protein	18.114	1238	1257
			|||||||||||||.||||||
			ACUGUCUUCUCUCGCUCGUG
ptc-miR156d	POPTR_0010s16400.1|PACid:18242283	1	UGACAGAAGAGAGUGAGCAC	AT1G69170.1		Squamosa promoter-binding protein-like (SBP domain) transcription factor family protein	21.097	1175	1194
			|||||||||||||o||||||
			ACUGUCUUCUCUCUCUCGUG
ptc-miR156d	POPTR_0008s09750.1|PACid:18247435	1	UGACAGAAGAGAGUGAGCAC	AT1G69170.1		Squamosa promoter-binding protein-like (SBP domain) transcription factor family protein	21.579	1088	1107
			|||||||||||||o||||||
			ACUGUCUUCUCUCUCUCGUG
ptc-miR156d	POPTR_0003s17120.1|PACid:18217293	1	UGACAGAAGAGAGUGAGCAC	AT5G43270.1	SPL2	squamosa promoter binding protein-like 2	9.239	1169	1188
			|||||||||||||o||||||
			ACUGUCUUCUCUCUCUCGUG
ptc-miR156d	POPTR_0018s14680.2|PACid:18215571	1	UGACAGAAGAGAGUGAGCAC	AT5G43270.1	SPL2	squamosa promoter binding protein-like 2	20.138	1127	1146
			|||||||||||||o||||||
			ACUGUCUUCUCUCUCUCGUG
ptc-miR156d	POPTR_0018s14680.1|PACid:18215570	1	UGACAGAAGAGAGUGAGCAC	AT5G43270.1	SPL2	squamosa promoter binding protein-like 2	20.138	1127	1146
			|||||||||||||o||||||
			ACUGUCUUCUCUCUCUCGUG
ptc-miR156d	POPTR_0018s14680.3|PACid:18215572	1	UGACAGAAGAGAGUGAGCAC	AT5G43270.1	SPL2	squamosa promoter binding protein-like 2	20.138	1127	1146
			|||||||||||||o||||||
			ACUGUCUUCUCUCUCUCGUG
ptc-miR156d	POPTR_0001s13890.1|PACid:18239288	1	UGACAGAAGAGAGUGAGCAC	AT5G43270.1	SPL2	squamosa promoter binding protein-like 2	14.052	1106	1125
			|||||||||||||o||||||
			ACUGUCUUCUCUCUCUCGUG
ptc-miR156d	POPTR_0014s05690.1|PACid:18223901	1	UGACAGAAGAGAGUGAGCAC	AT1G27370.1	SPL10	squamosa promoter binding protein-like 10	15.354	830	849
			|||||||||||||o||||||
			ACUGUCUUCUCUCUCUCGUG
ptc-miR156d	POPTR_0002s14330.1|PACid:18244437	1	UGACAGAAGAGAGUGAGCAC	AT1G27360.1	SPL11	squamosa promoter-like 11	15.86	809	828
			|||||||||||||o||||||
			ACUGUCUUCUCUCUCUCGUG
ptc-miR156d	POPTR_0015s11100.1|PACid:18232812	1	UGACAGAAGAGAGUGAGCAC	AT5G50670.1	SPL13B	Squamosa promoter-binding protein-like (SBP domain) transcription factor family protein	14.776	899	918
			|||||||||||||o||||||
			ACUGUCUUCUCUCUCUCGUG
ptc-miR156d	POPTR_0001s13630.1|PACid:18234979	1	UGACAGAAGAGAGUGAGCAC	AT5G50670.1	SPL13B	Squamosa promoter-binding protein-like (SBP domain) transcription factor family protein	12.661	857	876
			|||||||||||||o||||||
			ACUGUCUUCUCUCUCUCGUG
ptc-miR156d	POPTR_0003s16780.1|PACid:18216841	1	UGACAGAAGAGAGUGAGCAC	AT5G50670.1	SPL13B	Squamosa promoter-binding protein-like (SBP domain) transcription factor family protein	12.612	668	687
			|||||||||||||o||||||
			ACUGUCUUCUCUCUCUCGUG
ptc-miR156d	POPTR_0016s04890.1|PACid:18249881	1	UGACAGAAGAGAGUGAGCAC	AT2G42200.1	SPL9	squamosa promoter binding protein-like 9	17.571	425	444
			|||||||||||||o||||||
			ACUGUCUUCUCUCUCUCGUG
ptc-miR156d	POPTR_0011s05490.1|PACid:18232063	2	UGACAGAAGAGAGUGAGCAC				12.946	193	212
			|||||||||||||o|||||o
			ACUGUCUUCUCUCUCUCGUA
ptc-miR156d	POPTR_0012s10260.1|PACid:18229814	2	UGACAGAAGAGAGUGAGCAC	AT5G50670.1	SPL13B	Squamosa promoter-binding protein-like (SBP domain) transcription factor family protein	15.102	949	968
			|||||||||||||o||||o|
			ACUGUCUUCUCUCUCUCGCG
ptc-miR156d	POPTR_0001s34380.1|PACid:18237630	3.5	UGACAGAAGAGAGUGAGCAC	AT5G46420.1		16S rRNA processing protein RimM family	21.134	1611	1630
			||||||||||.||..|||oo
			ACUGUCUUCUUUCGUUCGAU
ptc-miR156d	POPTR_0013s11750.1|PACid:18220764	3	UGACAGAAGAGAGUGAGCAC	AT1G65280.1		DNAJ heat shock N-terminal domain-containing protein	18.825	824	843
			||||||||||o|||.|.||o
			ACUGUCUUCUGUCAUUUGUC
ptc-miR156d	POPTR_0005s14760.1|PACid:18208221	4	UGACAGAAGAGAGUGAGCAC	AT4G18950.1		Integrin-linked protein kinase family	15.745	1044	1063
			||||||||||.|.||||oo|
			ACUGUCUUCUUUUACUCCCG
ptc-miR156d	POPTR_0009s07740.1|PACid:18228518	4	UGACAGAAGAGAGUGAGCAC	AT3G11130.1		Clathrin, heavy chain	16.342	2513	2532
			||o|||||||||..||.||o
			ACCGUCUUCUCUUGCUUGUC
ptc-miR156d	POPTR_0019s01620.1|PACid:18219741	4.5	UGACAGAAGAGAGUGAGCAC	AT1G15190.1		Fasciclin-like arabinogalactan family protein	6.381	232	251
			o|||||||||||||||.ooo
			CCUGUCUUCUCUCACUUCCA
ptc-miR156d	POPTR_0879s00210.1|PACid:18228914	4.5	UGACAGAAGAGAGUGAGCAC	AT1G15190.1		Fasciclin-like arabinogalactan family protein	6.603	214	233
			o|||||||||||||||.ooo
			CCUGUCUUCUCUCACUUCCA
ptc-miR156d	POPTR_0010s06270.1|PACid:18241911	4.5	UGACAGAAGAGAGUGAGCAC	AT1G67720.1		Leucine-rich repeat protein kinase family protein	17.336	1011	1030
			|||||.||||||.|||.ooo
			ACUGUUUUCUCUUACUUUCC
ptc-miR156d	POPTR_0002s07970.1|PACid:18246002	3.5	UGACAGAAGAGAGUGAGCAC	AT1G77380.1	AAP3	amino acid permease 3	20.272	219	238
			|||||.||||||...|.o||
			ACUGUUUUCUCUUGUUUUUG
ptc-miR156d	POPTR_0014s04170.1|PACid:18223645	3	UGACAGAAGAGAGUGAGCAC	AT1G80950.1		Phospholipid/glycerol acyltransferase family protein	14.972	970	989
			||||||||.|||oo||.|||
			ACUGUCUUUUCUAUCUUGUG
ptc-miR156e	POPTR_0015s07140.1|PACid:18232622	0.5	UGACAGAAGAGAGUGAGCAC	AT1G69170.1		Squamosa promoter-binding protein-like (SBP domain) transcription factor family protein	18.114	1238	1257
			|||||||||||||.||||||
			ACUGUCUUCUCUCGCUCGUG
ptc-miR156e	POPTR_0010s16400.1|PACid:18242283	1	UGACAGAAGAGAGUGAGCAC	AT1G69170.1		Squamosa promoter-binding protein-like (SBP domain) transcription factor family protein	21.097	1175	1194
			|||||||||||||o||||||
			ACUGUCUUCUCUCUCUCGUG
ptc-miR156e	POPTR_0008s09750.1|PACid:18247435	1	UGACAGAAGAGAGUGAGCAC	AT1G69170.1		Squamosa promoter-binding protein-like (SBP domain) transcription factor family protein	21.579	1088	1107
			|||||||||||||o||||||
			ACUGUCUUCUCUCUCUCGUG
ptc-miR156e	POPTR_0003s17120.1|PACid:18217293	1	UGACAGAAGAGAGUGAGCAC	AT5G43270.1	SPL2	squamosa promoter binding protein-like 2	9.239	1169	1188
			|||||||||||||o||||||
			ACUGUCUUCUCUCUCUCGUG
ptc-miR156e	POPTR_0018s14680.2|PACid:18215571	1	UGACAGAAGAGAGUGAGCAC	AT5G43270.1	SPL2	squamosa promoter binding protein-like 2	20.138	1127	1146
			|||||||||||||o||||||
			ACUGUCUUCUCUCUCUCGUG
ptc-miR156e	POPTR_0018s14680.1|PACid:18215570	1	UGACAGAAGAGAGUGAGCAC	AT5G43270.1	SPL2	squamosa promoter binding protein-like 2	20.138	1127	1146
			|||||||||||||o||||||
			ACUGUCUUCUCUCUCUCGUG
ptc-miR156e	POPTR_0018s14680.3|PACid:18215572	1	UGACAGAAGAGAGUGAGCAC	AT5G43270.1	SPL2	squamosa promoter binding protein-like 2	20.138	1127	1146
			|||||||||||||o||||||
			ACUGUCUUCUCUCUCUCGUG
ptc-miR156e	POPTR_0001s13890.1|PACid:18239288	1	UGACAGAAGAGAGUGAGCAC	AT5G43270.1	SPL2	squamosa promoter binding protein-like 2	14.052	1106	1125
			|||||||||||||o||||||
			ACUGUCUUCUCUCUCUCGUG
ptc-miR156e	POPTR_0014s05690.1|PACid:18223901	1	UGACAGAAGAGAGUGAGCAC	AT1G27370.1	SPL10	squamosa promoter binding protein-like 10	15.354	830	849
			|||||||||||||o||||||
			ACUGUCUUCUCUCUCUCGUG
ptc-miR156e	POPTR_0002s14330.1|PACid:18244437	1	UGACAGAAGAGAGUGAGCAC	AT1G27360.1	SPL11	squamosa promoter-like 11	15.86	809	828
			|||||||||||||o||||||
			ACUGUCUUCUCUCUCUCGUG
ptc-miR156e	POPTR_0015s11100.1|PACid:18232812	1	UGACAGAAGAGAGUGAGCAC	AT5G50670.1	SPL13B	Squamosa promoter-binding protein-like (SBP domain) transcription factor family protein	14.776	899	918
			|||||||||||||o||||||
			ACUGUCUUCUCUCUCUCGUG
ptc-miR156e	POPTR_0001s13630.1|PACid:18234979	1	UGACAGAAGAGAGUGAGCAC	AT5G50670.1	SPL13B	Squamosa promoter-binding protein-like (SBP domain) transcription factor family protein	12.661	857	876
			|||||||||||||o||||||
			ACUGUCUUCUCUCUCUCGUG
ptc-miR156e	POPTR_0003s16780.1|PACid:18216841	1	UGACAGAAGAGAGUGAGCAC	AT5G50670.1	SPL13B	Squamosa promoter-binding protein-like (SBP domain) transcription factor family protein	12.612	668	687
			|||||||||||||o||||||
			ACUGUCUUCUCUCUCUCGUG
ptc-miR156e	POPTR_0016s04890.1|PACid:18249881	1	UGACAGAAGAGAGUGAGCAC	AT2G42200.1	SPL9	squamosa promoter binding protein-like 9	17.571	425	444
			|||||||||||||o||||||
			ACUGUCUUCUCUCUCUCGUG
ptc-miR156e	POPTR_0011s05490.1|PACid:18232063	2	UGACAGAAGAGAGUGAGCAC				12.946	193	212
			|||||||||||||o|||||o
			ACUGUCUUCUCUCUCUCGUA
ptc-miR156e	POPTR_0012s10260.1|PACid:18229814	2	UGACAGAAGAGAGUGAGCAC	AT5G50670.1	SPL13B	Squamosa promoter-binding protein-like (SBP domain) transcription factor family protein	15.102	949	968
			|||||||||||||o||||o|
			ACUGUCUUCUCUCUCUCGCG
ptc-miR156e	POPTR_0001s34380.1|PACid:18237630	3.5	UGACAGAAGAGAGUGAGCAC	AT5G46420.1		16S rRNA processing protein RimM family	21.134	1611	1630
			||||||||||.||..|||oo
			ACUGUCUUCUUUCGUUCGAU
ptc-miR156e	POPTR_0013s11750.1|PACid:18220764	3	UGACAGAAGAGAGUGAGCAC	AT1G65280.1		DNAJ heat shock N-terminal domain-containing protein	18.825	824	843
			||||||||||o|||.|.||o
			ACUGUCUUCUGUCAUUUGUC
ptc-miR156e	POPTR_0005s14760.1|PACid:18208221	4	UGACAGAAGAGAGUGAGCAC	AT4G18950.1		Integrin-linked protein kinase family	15.745	1044	1063
			||||||||||.|.||||oo|
			ACUGUCUUCUUUUACUCCCG
ptc-miR156e	POPTR_0009s07740.1|PACid:18228518	4	UGACAGAAGAGAGUGAGCAC	AT3G11130.1		Clathrin, heavy chain	16.342	2513	2532
			||o|||||||||..||.||o
			ACCGUCUUCUCUUGCUUGUC
ptc-miR156e	POPTR_0019s01620.1|PACid:18219741	4.5	UGACAGAAGAGAGUGAGCAC	AT1G15190.1		Fasciclin-like arabinogalactan family protein	6.381	232	251
			o|||||||||||||||.ooo
			CCUGUCUUCUCUCACUUCCA
ptc-miR156e	POPTR_0879s00210.1|PACid:18228914	4.5	UGACAGAAGAGAGUGAGCAC	AT1G15190.1		Fasciclin-like arabinogalactan family protein	6.603	214	233
			o|||||||||||||||.ooo
			CCUGUCUUCUCUCACUUCCA
ptc-miR156e	POPTR_0010s06270.1|PACid:18241911	4.5	UGACAGAAGAGAGUGAGCAC	AT1G67720.1		Leucine-rich repeat protein kinase family protein	17.336	1011	1030
			|||||.||||||.|||.ooo
			ACUGUUUUCUCUUACUUUCC
ptc-miR156e	POPTR_0002s07970.1|PACid:18246002	3.5	UGACAGAAGAGAGUGAGCAC	AT1G77380.1	AAP3	amino acid permease 3	20.272	219	238
			|||||.||||||...|.o||
			ACUGUUUUCUCUUGUUUUUG
ptc-miR156e	POPTR_0014s04170.1|PACid:18223645	3	UGACAGAAGAGAGUGAGCAC	AT1G80950.1		Phospholipid/glycerol acyltransferase family protein	14.972	970	989
			||||||||.|||oo||.|||
			ACUGUCUUUUCUAUCUUGUG
ptc-miR156f	POPTR_0015s07140.1|PACid:18232622	0.5	UGACAGAAGAGAGUGAGCAC	AT1G69170.1		Squamosa promoter-binding protein-like (SBP domain) transcription factor family protein	18.114	1238	1257
			|||||||||||||.||||||
			ACUGUCUUCUCUCGCUCGUG
ptc-miR156f	POPTR_0010s16400.1|PACid:18242283	1	UGACAGAAGAGAGUGAGCAC	AT1G69170.1		Squamosa promoter-binding protein-like (SBP domain) transcription factor family protein	21.097	1175	1194
			|||||||||||||o||||||
			ACUGUCUUCUCUCUCUCGUG
ptc-miR156f	POPTR_0008s09750.1|PACid:18247435	1	UGACAGAAGAGAGUGAGCAC	AT1G69170.1		Squamosa promoter-binding protein-like (SBP domain) transcription factor family protein	21.579	1088	1107
			|||||||||||||o||||||
			ACUGUCUUCUCUCUCUCGUG
ptc-miR156f	POPTR_0003s17120.1|PACid:18217293	1	UGACAGAAGAGAGUGAGCAC	AT5G43270.1	SPL2	squamosa promoter binding protein-like 2	9.239	1169	1188
			|||||||||||||o||||||
			ACUGUCUUCUCUCUCUCGUG
ptc-miR156f	POPTR_0018s14680.2|PACid:18215571	1	UGACAGAAGAGAGUGAGCAC	AT5G43270.1	SPL2	squamosa promoter binding protein-like 2	20.138	1127	1146
			|||||||||||||o||||||
			ACUGUCUUCUCUCUCUCGUG
ptc-miR156f	POPTR_0018s14680.1|PACid:18215570	1	UGACAGAAGAGAGUGAGCAC	AT5G43270.1	SPL2	squamosa promoter binding protein-like 2	20.138	1127	1146
			|||||||||||||o||||||
			ACUGUCUUCUCUCUCUCGUG
ptc-miR156f	POPTR_0018s14680.3|PACid:18215572	1	UGACAGAAGAGAGUGAGCAC	AT5G43270.1	SPL2	squamosa promoter binding protein-like 2	20.138	1127	1146
			|||||||||||||o||||||
			ACUGUCUUCUCUCUCUCGUG
ptc-miR156f	POPTR_0001s13890.1|PACid:18239288	1	UGACAGAAGAGAGUGAGCAC	AT5G43270.1	SPL2	squamosa promoter binding protein-like 2	14.052	1106	1125
			|||||||||||||o||||||
			ACUGUCUUCUCUCUCUCGUG
ptc-miR156f	POPTR_0014s05690.1|PACid:18223901	1	UGACAGAAGAGAGUGAGCAC	AT1G27370.1	SPL10	squamosa promoter binding protein-like 10	15.354	830	849
			|||||||||||||o||||||
			ACUGUCUUCUCUCUCUCGUG
ptc-miR156f	POPTR_0002s14330.1|PACid:18244437	1	UGACAGAAGAGAGUGAGCAC	AT1G27360.1	SPL11	squamosa promoter-like 11	15.86	809	828
			|||||||||||||o||||||
			ACUGUCUUCUCUCUCUCGUG
ptc-miR156f	POPTR_0015s11100.1|PACid:18232812	1	UGACAGAAGAGAGUGAGCAC	AT5G50670.1	SPL13B	Squamosa promoter-binding protein-like (SBP domain) transcription factor family protein	14.776	899	918
			|||||||||||||o||||||
			ACUGUCUUCUCUCUCUCGUG
ptc-miR156f	POPTR_0001s13630.1|PACid:18234979	1	UGACAGAAGAGAGUGAGCAC	AT5G50670.1	SPL13B	Squamosa promoter-binding protein-like (SBP domain) transcription factor family protein	12.661	857	876
			|||||||||||||o||||||
			ACUGUCUUCUCUCUCUCGUG
ptc-miR156f	POPTR_0003s16780.1|PACid:18216841	1	UGACAGAAGAGAGUGAGCAC	AT5G50670.1	SPL13B	Squamosa promoter-binding protein-like (SBP domain) transcription factor family protein	12.612	668	687
			|||||||||||||o||||||
			ACUGUCUUCUCUCUCUCGUG
ptc-miR156f	POPTR_0016s04890.1|PACid:18249881	1	UGACAGAAGAGAGUGAGCAC	AT2G42200.1	SPL9	squamosa promoter binding protein-like 9	17.571	425	444
			|||||||||||||o||||||
			ACUGUCUUCUCUCUCUCGUG
ptc-miR156f	POPTR_0011s05490.1|PACid:18232063	2	UGACAGAAGAGAGUGAGCAC				12.946	193	212
			|||||||||||||o|||||o
			ACUGUCUUCUCUCUCUCGUA
ptc-miR156f	POPTR_0012s10260.1|PACid:18229814	2	UGACAGAAGAGAGUGAGCAC	AT5G50670.1	SPL13B	Squamosa promoter-binding protein-like (SBP domain) transcription factor family protein	15.102	949	968
			|||||||||||||o||||o|
			ACUGUCUUCUCUCUCUCGCG
ptc-miR156f	POPTR_0001s34380.1|PACid:18237630	3.5	UGACAGAAGAGAGUGAGCAC	AT5G46420.1		16S rRNA processing protein RimM family	21.134	1611	1630
			||||||||||.||..|||oo
			ACUGUCUUCUUUCGUUCGAU
ptc-miR156f	POPTR_0013s11750.1|PACid:18220764	3	UGACAGAAGAGAGUGAGCAC	AT1G65280.1		DNAJ heat shock N-terminal domain-containing protein	18.825	824	843
			||||||||||o|||.|.||o
			ACUGUCUUCUGUCAUUUGUC
ptc-miR156f	POPTR_0005s14760.1|PACid:18208221	4	UGACAGAAGAGAGUGAGCAC	AT4G18950.1		Integrin-linked protein kinase family	15.745	1044	1063
			||||||||||.|.||||oo|
			ACUGUCUUCUUUUACUCCCG
ptc-miR156f	POPTR_0009s07740.1|PACid:18228518	4	UGACAGAAGAGAGUGAGCAC	AT3G11130.1		Clathrin, heavy chain	16.342	2513	2532
			||o|||||||||..||.||o
			ACCGUCUUCUCUUGCUUGUC
ptc-miR156f	POPTR_0019s01620.1|PACid:18219741	4.5	UGACAGAAGAGAGUGAGCAC	AT1G15190.1		Fasciclin-like arabinogalactan family protein	6.381	232	251
			o|||||||||||||||.ooo
			CCUGUCUUCUCUCACUUCCA
ptc-miR156f	POPTR_0879s00210.1|PACid:18228914	4.5	UGACAGAAGAGAGUGAGCAC	AT1G15190.1		Fasciclin-like arabinogalactan family protein	6.603	214	233
			o|||||||||||||||.ooo
			CCUGUCUUCUCUCACUUCCA
ptc-miR156f	POPTR_0010s06270.1|PACid:18241911	4.5	UGACAGAAGAGAGUGAGCAC	AT1G67720.1		Leucine-rich repeat protein kinase family protein	17.336	1011	1030
			|||||.||||||.|||.ooo
			ACUGUUUUCUCUUACUUUCC
ptc-miR156f	POPTR_0002s07970.1|PACid:18246002	3.5	UGACAGAAGAGAGUGAGCAC	AT1G77380.1	AAP3	amino acid permease 3	20.272	219	238
			|||||.||||||...|.o||
			ACUGUUUUCUCUUGUUUUUG
ptc-miR156f	POPTR_0014s04170.1|PACid:18223645	3	UGACAGAAGAGAGUGAGCAC	AT1G80950.1		Phospholipid/glycerol acyltransferase family protein	14.972	970	989
			||||||||.|||oo||.|||
			ACUGUCUUUUCUAUCUUGUG
ptc-miR156g	POPTR_0003s17120.1|PACid:18217293	1	UUGACAGAAGAUAGAGAGCAC	AT5G43270.1	SPL2	squamosa promoter binding protein-like 2	12.949	1169	1189
			|||||||||||o|||||||||
			AACUGUCUUCUCUCUCUCGUG
ptc-miR156g	POPTR_0018s14680.3|PACid:18215572	1	UUGACAGAAGAUAGAGAGCAC	AT5G43270.1	SPL2	squamosa promoter binding protein-like 2	20.301	1127	1147
			|||||||||||o|||||||||
			AACUGUCUUCUCUCUCUCGUG
ptc-miR156g	POPTR_0018s14680.2|PACid:18215571	1	UUGACAGAAGAUAGAGAGCAC	AT5G43270.1	SPL2	squamosa promoter binding protein-like 2	20.301	1127	1147
			|||||||||||o|||||||||
			AACUGUCUUCUCUCUCUCGUG
ptc-miR156g	POPTR_0018s14680.1|PACid:18215570	1	UUGACAGAAGAUAGAGAGCAC	AT5G43270.1	SPL2	squamosa promoter binding protein-like 2	20.301	1127	1147
			|||||||||||o|||||||||
			AACUGUCUUCUCUCUCUCGUG
ptc-miR156g	POPTR_0001s13890.1|PACid:18239288	1	UUGACAGAAGAUAGAGAGCAC	AT5G43270.1	SPL2	squamosa promoter binding protein-like 2	16.601	1106	1126
			|||||||||||o|||||||||
			AACUGUCUUCUCUCUCUCGUG
ptc-miR156g	POPTR_0016s04890.1|PACid:18249881	1	UUGACAGAAGAUAGAGAGCAC	AT2G42200.1	SPL9	squamosa promoter binding protein-like 9	18.386	425	445
			|||||||||||o|||||||||
			AACUGUCUUCUCUCUCUCGUG
ptc-miR156g	POPTR_0010s16400.1|PACid:18242283	1.5	UUGACAGAAGAUAGAGAGCAC	AT1G69170.1		Squamosa promoter-binding protein-like (SBP domain) transcription factor family protein	20.943	1175	1195
			.||||||||||o|||||||||
			GACUGUCUUCUCUCUCUCGUG
ptc-miR156g	POPTR_0008s09750.1|PACid:18247435	1.5	UUGACAGAAGAUAGAGAGCAC	AT1G69170.1		Squamosa promoter-binding protein-like (SBP domain) transcription factor family protein	20.754	1088	1108
			.||||||||||o|||||||||
			GACUGUCUUCUCUCUCUCGUG
ptc-miR156g	POPTR_0014s05690.1|PACid:18223901	2	UUGACAGAAGAUAGAGAGCAC	AT1G27370.1	SPL10	squamosa promoter binding protein-like 10	15.356	830	850
			o||||||||||o|||||||||
			UACUGUCUUCUCUCUCUCGUG
ptc-miR156g	POPTR_0002s14330.1|PACid:18244437	2	UUGACAGAAGAUAGAGAGCAC	AT1G27360.1	SPL11	squamosa promoter-like 11	15.86	809	829
			o||||||||||o|||||||||
			UACUGUCUUCUCUCUCUCGUG
ptc-miR156g	POPTR_0015s11100.1|PACid:18232812	2	UUGACAGAAGAUAGAGAGCAC	AT5G50670.1	SPL13B	Squamosa promoter-binding protein-like (SBP domain) transcription factor family protein	14.755	899	919
			o||||||||||o|||||||||
			UACUGUCUUCUCUCUCUCGUG
ptc-miR156g	POPTR_0001s13630.1|PACid:18234979	2	UUGACAGAAGAUAGAGAGCAC	AT5G50670.1	SPL13B	Squamosa promoter-binding protein-like (SBP domain) transcription factor family protein	13.43	857	877
			o||||||||||o|||||||||
			UACUGUCUUCUCUCUCUCGUG
ptc-miR156g	POPTR_0003s16780.1|PACid:18216841	2	UUGACAGAAGAUAGAGAGCAC	AT5G50670.1	SPL13B	Squamosa promoter-binding protein-like (SBP domain) transcription factor family protein	12.534	668	688
			o||||||||||o|||||||||
			UACUGUCUUCUCUCUCUCGUG
ptc-miR156g	POPTR_0013s08490.1|PACid:18220802	1.5	UUGACAGAAGAUAGAGAGCA	AT3G02830.1	ZFN1	zinc finger protein 1	13.047	736	755
			.|||||.||||||.||||||
			GACUGUUUUCUAUUUCUCGU
ptc-miR156g	POPTR_0011s05490.1|PACid:18232063	1	UUGACAGAAGAUAGAGAGCA				11.855	194	213
			|||||||||||o||||||||
			AACUGUCUUCUCUCUCUCGU
ptc-miR156g	POPTR_0012s14160.1|PACid:18230140	2.5	UUGACAGAAGAUAGAGAGCA	AT4G21120.1	AAT1	amino acid transporter 1	18.154	395	414
			o|.||||||||.|||.||||
			CAUUGUCUUCUGUCUUUCGU
ptc-miR156g	POPTR_0012s08950.1|PACid:18229278	3	UUGACAGAAGAUAGAGAGCAC	AT1G12940.1	NRT2.5	nitrate transporter2.5	18.013	1084	1104
			|||o|||||||o|||||.|||
			AACCGUCUUCUUUCUCUUGUG
ptc-miR156g	POPTR_0007s05040.1|PACid:18243750	4.5	UUGACAGAAGAUAGAGAGCAC	AT4G40050.1		Protein of unknown function (DUF3550/UPF0682)	16.018	1669	1689
			oo|o|||||||.|||||||||
			UCCCGUCUUCUGUCUCUCGUG
ptc-miR156g	POPTR_0013s03140.1|PACid:18220823	3	UUGACAGAAGAUAGAGAGCA	AT4G21120.1	AAT1	amino acid transporter 1	17.776	365	384
			o|.||||||.|.|||.||||
			CAUUGUCUUUUGUCUUUCGU
ptc-miR156g	POPTR_0015s07140.1|PACid:18232622	3	UUGACAGAAGAUAGAGAGCAC	AT1G69170.1		Squamosa promoter-binding protein-like (SBP domain) transcription factor family protein	17.587	1238	1258
			o||||||||||o||o||||||
			UACUGUCUUCUCUCGCUCGUG
ptc-miR156g	POPTR_0012s10260.1|PACid:18229814	3	UUGACAGAAGAUAGAGAGCAC	AT5G50670.1	SPL13B	Squamosa promoter-binding protein-like (SBP domain) transcription factor family protein	13.641	949	969
			o||||||||||o|||||||o|
			UACUGUCUUCUCUCUCUCGCG
ptc-miR156g	POPTR_0014s04170.1|PACid:18223645	3	UUGACAGAAGAUAGAGAGCAC	AT1G80950.1		Phospholipid/glycerol acyltransferase family protein	14.997	970	990
			|||||||||.|o|o|||.|||
			AACUGUCUUUUCUAUCUUGUG
ptc-miR156g	POPTR_0001s38770.1|PACid:18235775	3.5	UUGACAGAAGAUAGAGAGCA	AT1G17120.1	CAT8	cationic amino acid transporter 8	16.646	431	450
			o|.|||.||.|.|||.||||
			CAUUGUUUUUUGUCUUUCGU
ptc-miR156g	POPTR_0003s15340.1|PACid:18217028	3	UUGACAGAAGAUAGAGAGCA	AT2G34960.1	CAT5	cationic amino acid transporter 5	22.699	365	384
			o|.||||||o|.||||||||
			CAUUGUCUUAUGUCUCUCGU
ptc-miR156g	POPTR_0001s12180.1|PACid:18235280	3	UUGACAGAAGAUAGAGAGCA	AT2G34960.1	CAT5	cationic amino acid transporter 5	19.415	296	315
			o|.||||||o|.||||||||
			CAUUGUCUUAUGUCUCUCGU
ptc-miR156h	POPTR_0003s17120.1|PACid:18217293	1	UUGACAGAAGAUAGAGAGCAC	AT5G43270.1	SPL2	squamosa promoter binding protein-like 2	12.949	1169	1189
			|||||||||||o|||||||||
			AACUGUCUUCUCUCUCUCGUG
ptc-miR156h	POPTR_0018s14680.3|PACid:18215572	1	UUGACAGAAGAUAGAGAGCAC	AT5G43270.1	SPL2	squamosa promoter binding protein-like 2	20.301	1127	1147
			|||||||||||o|||||||||
			AACUGUCUUCUCUCUCUCGUG
ptc-miR156h	POPTR_0018s14680.2|PACid:18215571	1	UUGACAGAAGAUAGAGAGCAC	AT5G43270.1	SPL2	squamosa promoter binding protein-like 2	20.301	1127	1147
			|||||||||||o|||||||||
			AACUGUCUUCUCUCUCUCGUG
ptc-miR156h	POPTR_0018s14680.1|PACid:18215570	1	UUGACAGAAGAUAGAGAGCAC	AT5G43270.1	SPL2	squamosa promoter binding protein-like 2	20.301	1127	1147
			|||||||||||o|||||||||
			AACUGUCUUCUCUCUCUCGUG
ptc-miR156h	POPTR_0001s13890.1|PACid:18239288	1	UUGACAGAAGAUAGAGAGCAC	AT5G43270.1	SPL2	squamosa promoter binding protein-like 2	16.601	1106	1126
			|||||||||||o|||||||||
			AACUGUCUUCUCUCUCUCGUG
ptc-miR156h	POPTR_0016s04890.1|PACid:18249881	1	UUGACAGAAGAUAGAGAGCAC	AT2G42200.1	SPL9	squamosa promoter binding protein-like 9	18.386	425	445
			|||||||||||o|||||||||
			AACUGUCUUCUCUCUCUCGUG
ptc-miR156h	POPTR_0010s16400.1|PACid:18242283	1.5	UUGACAGAAGAUAGAGAGCAC	AT1G69170.1		Squamosa promoter-binding protein-like (SBP domain) transcription factor family protein	20.943	1175	1195
			.||||||||||o|||||||||
			GACUGUCUUCUCUCUCUCGUG
ptc-miR156h	POPTR_0008s09750.1|PACid:18247435	1.5	UUGACAGAAGAUAGAGAGCAC	AT1G69170.1		Squamosa promoter-binding protein-like (SBP domain) transcription factor family protein	20.754	1088	1108
			.||||||||||o|||||||||
			GACUGUCUUCUCUCUCUCGUG
ptc-miR156h	POPTR_0014s05690.1|PACid:18223901	2	UUGACAGAAGAUAGAGAGCAC	AT1G27370.1	SPL10	squamosa promoter binding protein-like 10	15.356	830	850
			o||||||||||o|||||||||
			UACUGUCUUCUCUCUCUCGUG
ptc-miR156h	POPTR_0002s14330.1|PACid:18244437	2	UUGACAGAAGAUAGAGAGCAC	AT1G27360.1	SPL11	squamosa promoter-like 11	15.86	809	829
			o||||||||||o|||||||||
			UACUGUCUUCUCUCUCUCGUG
ptc-miR156h	POPTR_0015s11100.1|PACid:18232812	2	UUGACAGAAGAUAGAGAGCAC	AT5G50670.1	SPL13B	Squamosa promoter-binding protein-like (SBP domain) transcription factor family protein	14.755	899	919
			o||||||||||o|||||||||
			UACUGUCUUCUCUCUCUCGUG
ptc-miR156h	POPTR_0001s13630.1|PACid:18234979	2	UUGACAGAAGAUAGAGAGCAC	AT5G50670.1	SPL13B	Squamosa promoter-binding protein-like (SBP domain) transcription factor family protein	13.43	857	877
			o||||||||||o|||||||||
			UACUGUCUUCUCUCUCUCGUG
ptc-miR156h	POPTR_0003s16780.1|PACid:18216841	2	UUGACAGAAGAUAGAGAGCAC	AT5G50670.1	SPL13B	Squamosa promoter-binding protein-like (SBP domain) transcription factor family protein	12.534	668	688
			o||||||||||o|||||||||
			UACUGUCUUCUCUCUCUCGUG
ptc-miR156h	POPTR_0013s08490.1|PACid:18220802	1.5	UUGACAGAAGAUAGAGAGCA	AT3G02830.1	ZFN1	zinc finger protein 1	13.047	736	755
			.|||||.||||||.||||||
			GACUGUUUUCUAUUUCUCGU
ptc-miR156h	POPTR_0011s05490.1|PACid:18232063	1	UUGACAGAAGAUAGAGAGCA				11.855	194	213
			|||||||||||o||||||||
			AACUGUCUUCUCUCUCUCGU
ptc-miR156h	POPTR_0012s14160.1|PACid:18230140	2.5	UUGACAGAAGAUAGAGAGCA	AT4G21120.1	AAT1	amino acid transporter 1	18.154	395	414
			o|.||||||||.|||.||||
			CAUUGUCUUCUGUCUUUCGU
ptc-miR156h	POPTR_0012s08950.1|PACid:18229278	3	UUGACAGAAGAUAGAGAGCAC	AT1G12940.1	NRT2.5	nitrate transporter2.5	18.013	1084	1104
			|||o|||||||o|||||.|||
			AACCGUCUUCUUUCUCUUGUG
ptc-miR156h	POPTR_0007s05040.1|PACid:18243750	4.5	UUGACAGAAGAUAGAGAGCAC	AT4G40050.1		Protein of unknown function (DUF3550/UPF0682)	16.018	1669	1689
			oo|o|||||||.|||||||||
			UCCCGUCUUCUGUCUCUCGUG
ptc-miR156h	POPTR_0013s03140.1|PACid:18220823	3	UUGACAGAAGAUAGAGAGCA	AT4G21120.1	AAT1	amino acid transporter 1	17.776	365	384
			o|.||||||.|.|||.||||
			CAUUGUCUUUUGUCUUUCGU
ptc-miR156h	POPTR_0015s07140.1|PACid:18232622	3	UUGACAGAAGAUAGAGAGCAC	AT1G69170.1		Squamosa promoter-binding protein-like (SBP domain) transcription factor family protein	17.587	1238	1258
			o||||||||||o||o||||||
			UACUGUCUUCUCUCGCUCGUG
ptc-miR156h	POPTR_0012s10260.1|PACid:18229814	3	UUGACAGAAGAUAGAGAGCAC	AT5G50670.1	SPL13B	Squamosa promoter-binding protein-like (SBP domain) transcription factor family protein	13.641	949	969
			o||||||||||o|||||||o|
			UACUGUCUUCUCUCUCUCGCG
ptc-miR156h	POPTR_0014s04170.1|PACid:18223645	3	UUGACAGAAGAUAGAGAGCAC	AT1G80950.1		Phospholipid/glycerol acyltransferase family protein	14.997	970	990
			|||||||||.|o|o|||.|||
			AACUGUCUUUUCUAUCUUGUG
ptc-miR156h	POPTR_0001s38770.1|PACid:18235775	3.5	UUGACAGAAGAUAGAGAGCA	AT1G17120.1	CAT8	cationic amino acid transporter 8	16.646	431	450
			o|.|||.||.|.|||.||||
			CAUUGUUUUUUGUCUUUCGU
ptc-miR156h	POPTR_0003s15340.1|PACid:18217028	3	UUGACAGAAGAUAGAGAGCA	AT2G34960.1	CAT5	cationic amino acid transporter 5	22.699	365	384
			o|.||||||o|.||||||||
			CAUUGUCUUAUGUCUCUCGU
ptc-miR156h	POPTR_0001s12180.1|PACid:18235280	3	UUGACAGAAGAUAGAGAGCA	AT2G34960.1	CAT5	cationic amino acid transporter 5	19.415	296	315
			o|.||||||o|.||||||||
			CAUUGUCUUAUGUCUCUCGU
ptc-miR156i	POPTR_0003s17120.1|PACid:18217293	1	UUGACAGAAGAUAGAGAGCAC	AT5G43270.1	SPL2	squamosa promoter binding protein-like 2	12.949	1169	1189
			|||||||||||o|||||||||
			AACUGUCUUCUCUCUCUCGUG
ptc-miR156i	POPTR_0018s14680.3|PACid:18215572	1	UUGACAGAAGAUAGAGAGCAC	AT5G43270.1	SPL2	squamosa promoter binding protein-like 2	20.301	1127	1147
			|||||||||||o|||||||||
			AACUGUCUUCUCUCUCUCGUG
ptc-miR156i	POPTR_0018s14680.2|PACid:18215571	1	UUGACAGAAGAUAGAGAGCAC	AT5G43270.1	SPL2	squamosa promoter binding protein-like 2	20.301	1127	1147
			|||||||||||o|||||||||
			AACUGUCUUCUCUCUCUCGUG
ptc-miR156i	POPTR_0018s14680.1|PACid:18215570	1	UUGACAGAAGAUAGAGAGCAC	AT5G43270.1	SPL2	squamosa promoter binding protein-like 2	20.301	1127	1147
			|||||||||||o|||||||||
			AACUGUCUUCUCUCUCUCGUG
ptc-miR156i	POPTR_0001s13890.1|PACid:18239288	1	UUGACAGAAGAUAGAGAGCAC	AT5G43270.1	SPL2	squamosa promoter binding protein-like 2	16.601	1106	1126
			|||||||||||o|||||||||
			AACUGUCUUCUCUCUCUCGUG
ptc-miR156i	POPTR_0016s04890.1|PACid:18249881	1	UUGACAGAAGAUAGAGAGCAC	AT2G42200.1	SPL9	squamosa promoter binding protein-like 9	18.386	425	445
			|||||||||||o|||||||||
			AACUGUCUUCUCUCUCUCGUG
ptc-miR156i	POPTR_0010s16400.1|PACid:18242283	1.5	UUGACAGAAGAUAGAGAGCAC	AT1G69170.1		Squamosa promoter-binding protein-like (SBP domain) transcription factor family protein	20.943	1175	1195
			.||||||||||o|||||||||
			GACUGUCUUCUCUCUCUCGUG
ptc-miR156i	POPTR_0008s09750.1|PACid:18247435	1.5	UUGACAGAAGAUAGAGAGCAC	AT1G69170.1		Squamosa promoter-binding protein-like (SBP domain) transcription factor family protein	20.754	1088	1108
			.||||||||||o|||||||||
			GACUGUCUUCUCUCUCUCGUG
ptc-miR156i	POPTR_0014s05690.1|PACid:18223901	2	UUGACAGAAGAUAGAGAGCAC	AT1G27370.1	SPL10	squamosa promoter binding protein-like 10	15.356	830	850
			o||||||||||o|||||||||
			UACUGUCUUCUCUCUCUCGUG
ptc-miR156i	POPTR_0002s14330.1|PACid:18244437	2	UUGACAGAAGAUAGAGAGCAC	AT1G27360.1	SPL11	squamosa promoter-like 11	15.86	809	829
			o||||||||||o|||||||||
			UACUGUCUUCUCUCUCUCGUG
ptc-miR156i	POPTR_0015s11100.1|PACid:18232812	2	UUGACAGAAGAUAGAGAGCAC	AT5G50670.1	SPL13B	Squamosa promoter-binding protein-like (SBP domain) transcription factor family protein	14.755	899	919
			o||||||||||o|||||||||
			UACUGUCUUCUCUCUCUCGUG
ptc-miR156i	POPTR_0001s13630.1|PACid:18234979	2	UUGACAGAAGAUAGAGAGCAC	AT5G50670.1	SPL13B	Squamosa promoter-binding protein-like (SBP domain) transcription factor family protein	13.43	857	877
			o||||||||||o|||||||||
			UACUGUCUUCUCUCUCUCGUG
ptc-miR156i	POPTR_0003s16780.1|PACid:18216841	2	UUGACAGAAGAUAGAGAGCAC	AT5G50670.1	SPL13B	Squamosa promoter-binding protein-like (SBP domain) transcription factor family protein	12.534	668	688
			o||||||||||o|||||||||
			UACUGUCUUCUCUCUCUCGUG
ptc-miR156i	POPTR_0013s08490.1|PACid:18220802	1.5	UUGACAGAAGAUAGAGAGCA	AT3G02830.1	ZFN1	zinc finger protein 1	13.047	736	755
			.|||||.||||||.||||||
			GACUGUUUUCUAUUUCUCGU
ptc-miR156i	POPTR_0011s05490.1|PACid:18232063	1	UUGACAGAAGAUAGAGAGCA				11.855	194	213
			|||||||||||o||||||||
			AACUGUCUUCUCUCUCUCGU
ptc-miR156i	POPTR_0012s14160.1|PACid:18230140	2.5	UUGACAGAAGAUAGAGAGCA	AT4G21120.1	AAT1	amino acid transporter 1	18.154	395	414
			o|.||||||||.|||.||||
			CAUUGUCUUCUGUCUUUCGU
ptc-miR156i	POPTR_0012s08950.1|PACid:18229278	3	UUGACAGAAGAUAGAGAGCAC	AT1G12940.1	NRT2.5	nitrate transporter2.5	18.013	1084	1104
			|||o|||||||o|||||.|||
			AACCGUCUUCUUUCUCUUGUG
ptc-miR156i	POPTR_0007s05040.1|PACid:18243750	4.5	UUGACAGAAGAUAGAGAGCAC	AT4G40050.1		Protein of unknown function (DUF3550/UPF0682)	16.018	1669	1689
			oo|o|||||||.|||||||||
			UCCCGUCUUCUGUCUCUCGUG
ptc-miR156i	POPTR_0013s03140.1|PACid:18220823	3	UUGACAGAAGAUAGAGAGCA	AT4G21120.1	AAT1	amino acid transporter 1	17.776	365	384
			o|.||||||.|.|||.||||
			CAUUGUCUUUUGUCUUUCGU
ptc-miR156i	POPTR_0015s07140.1|PACid:18232622	3	UUGACAGAAGAUAGAGAGCAC	AT1G69170.1		Squamosa promoter-binding protein-like (SBP domain) transcription factor family protein	17.587	1238	1258
			o||||||||||o||o||||||
			UACUGUCUUCUCUCGCUCGUG
ptc-miR156i	POPTR_0012s10260.1|PACid:18229814	3	UUGACAGAAGAUAGAGAGCAC	AT5G50670.1	SPL13B	Squamosa promoter-binding protein-like (SBP domain) transcription factor family protein	13.641	949	969
			o||||||||||o|||||||o|
			UACUGUCUUCUCUCUCUCGCG
ptc-miR156i	POPTR_0014s04170.1|PACid:18223645	3	UUGACAGAAGAUAGAGAGCAC	AT1G80950.1		Phospholipid/glycerol acyltransferase family protein	14.997	970	990
			|||||||||.|o|o|||.|||
			AACUGUCUUUUCUAUCUUGUG
ptc-miR156i	POPTR_0001s38770.1|PACid:18235775	3.5	UUGACAGAAGAUAGAGAGCA	AT1G17120.1	CAT8	cationic amino acid transporter 8	16.646	431	450
			o|.|||.||.|.|||.||||
			CAUUGUUUUUUGUCUUUCGU
ptc-miR156i	POPTR_0003s15340.1|PACid:18217028	3	UUGACAGAAGAUAGAGAGCA	AT2G34960.1	CAT5	cationic amino acid transporter 5	22.699	365	384
			o|.||||||o|.||||||||
			CAUUGUCUUAUGUCUCUCGU
ptc-miR156i	POPTR_0001s12180.1|PACid:18235280	3	UUGACAGAAGAUAGAGAGCA	AT2G34960.1	CAT5	cationic amino acid transporter 5	19.415	296	315
			o|.||||||o|.||||||||
			CAUUGUCUUAUGUCUCUCGU
ptc-miR156j	POPTR_0003s17120.1|PACid:18217293	1	UUGACAGAAGAUAGAGAGCAC	AT5G43270.1	SPL2	squamosa promoter binding protein-like 2	12.949	1169	1189
			|||||||||||o|||||||||
			AACUGUCUUCUCUCUCUCGUG
ptc-miR156j	POPTR_0018s14680.3|PACid:18215572	1	UUGACAGAAGAUAGAGAGCAC	AT5G43270.1	SPL2	squamosa promoter binding protein-like 2	20.301	1127	1147
			|||||||||||o|||||||||
			AACUGUCUUCUCUCUCUCGUG
ptc-miR156j	POPTR_0018s14680.2|PACid:18215571	1	UUGACAGAAGAUAGAGAGCAC	AT5G43270.1	SPL2	squamosa promoter binding protein-like 2	20.301	1127	1147
			|||||||||||o|||||||||
			AACUGUCUUCUCUCUCUCGUG
ptc-miR156j	POPTR_0018s14680.1|PACid:18215570	1	UUGACAGAAGAUAGAGAGCAC	AT5G43270.1	SPL2	squamosa promoter binding protein-like 2	20.301	1127	1147
			|||||||||||o|||||||||
			AACUGUCUUCUCUCUCUCGUG
ptc-miR156j	POPTR_0001s13890.1|PACid:18239288	1	UUGACAGAAGAUAGAGAGCAC	AT5G43270.1	SPL2	squamosa promoter binding protein-like 2	16.601	1106	1126
			|||||||||||o|||||||||
			AACUGUCUUCUCUCUCUCGUG
ptc-miR156j	POPTR_0016s04890.1|PACid:18249881	1	UUGACAGAAGAUAGAGAGCAC	AT2G42200.1	SPL9	squamosa promoter binding protein-like 9	18.386	425	445
			|||||||||||o|||||||||
			AACUGUCUUCUCUCUCUCGUG
ptc-miR156j	POPTR_0010s16400.1|PACid:18242283	1.5	UUGACAGAAGAUAGAGAGCAC	AT1G69170.1		Squamosa promoter-binding protein-like (SBP domain) transcription factor family protein	20.943	1175	1195
			.||||||||||o|||||||||
			GACUGUCUUCUCUCUCUCGUG
ptc-miR156j	POPTR_0008s09750.1|PACid:18247435	1.5	UUGACAGAAGAUAGAGAGCAC	AT1G69170.1		Squamosa promoter-binding protein-like (SBP domain) transcription factor family protein	20.754	1088	1108
			.||||||||||o|||||||||
			GACUGUCUUCUCUCUCUCGUG
ptc-miR156j	POPTR_0014s05690.1|PACid:18223901	2	UUGACAGAAGAUAGAGAGCAC	AT1G27370.1	SPL10	squamosa promoter binding protein-like 10	15.356	830	850
			o||||||||||o|||||||||
			UACUGUCUUCUCUCUCUCGUG
ptc-miR156j	POPTR_0002s14330.1|PACid:18244437	2	UUGACAGAAGAUAGAGAGCAC	AT1G27360.1	SPL11	squamosa promoter-like 11	15.86	809	829
			o||||||||||o|||||||||
			UACUGUCUUCUCUCUCUCGUG
ptc-miR156j	POPTR_0015s11100.1|PACid:18232812	2	UUGACAGAAGAUAGAGAGCAC	AT5G50670.1	SPL13B	Squamosa promoter-binding protein-like (SBP domain) transcription factor family protein	14.755	899	919
			o||||||||||o|||||||||
			UACUGUCUUCUCUCUCUCGUG
ptc-miR156j	POPTR_0001s13630.1|PACid:18234979	2	UUGACAGAAGAUAGAGAGCAC	AT5G50670.1	SPL13B	Squamosa promoter-binding protein-like (SBP domain) transcription factor family protein	13.43	857	877
			o||||||||||o|||||||||
			UACUGUCUUCUCUCUCUCGUG
ptc-miR156j	POPTR_0003s16780.1|PACid:18216841	2	UUGACAGAAGAUAGAGAGCAC	AT5G50670.1	SPL13B	Squamosa promoter-binding protein-like (SBP domain) transcription factor family protein	12.534	668	688
			o||||||||||o|||||||||
			UACUGUCUUCUCUCUCUCGUG
ptc-miR156j	POPTR_0013s08490.1|PACid:18220802	1.5	UUGACAGAAGAUAGAGAGCA	AT3G02830.1	ZFN1	zinc finger protein 1	13.047	736	755
			.|||||.||||||.||||||
			GACUGUUUUCUAUUUCUCGU
ptc-miR156j	POPTR_0011s05490.1|PACid:18232063	1	UUGACAGAAGAUAGAGAGCA				11.855	194	213
			|||||||||||o||||||||
			AACUGUCUUCUCUCUCUCGU
ptc-miR156j	POPTR_0012s14160.1|PACid:18230140	2.5	UUGACAGAAGAUAGAGAGCA	AT4G21120.1	AAT1	amino acid transporter 1	18.154	395	414
			o|.||||||||.|||.||||
			CAUUGUCUUCUGUCUUUCGU
ptc-miR156j	POPTR_0012s08950.1|PACid:18229278	3	UUGACAGAAGAUAGAGAGCAC	AT1G12940.1	NRT2.5	nitrate transporter2.5	18.013	1084	1104
			|||o|||||||o|||||.|||
			AACCGUCUUCUUUCUCUUGUG
ptc-miR156j	POPTR_0007s05040.1|PACid:18243750	4.5	UUGACAGAAGAUAGAGAGCAC	AT4G40050.1		Protein of unknown function (DUF3550/UPF0682)	16.018	1669	1689
			oo|o|||||||.|||||||||
			UCCCGUCUUCUGUCUCUCGUG
ptc-miR156j	POPTR_0013s03140.1|PACid:18220823	3	UUGACAGAAGAUAGAGAGCA	AT4G21120.1	AAT1	amino acid transporter 1	17.776	365	384
			o|.||||||.|.|||.||||
			CAUUGUCUUUUGUCUUUCGU
ptc-miR156j	POPTR_0015s07140.1|PACid:18232622	3	UUGACAGAAGAUAGAGAGCAC	AT1G69170.1		Squamosa promoter-binding protein-like (SBP domain) transcription factor family protein	17.587	1238	1258
			o||||||||||o||o||||||
			UACUGUCUUCUCUCGCUCGUG
ptc-miR156j	POPTR_0012s10260.1|PACid:18229814	3	UUGACAGAAGAUAGAGAGCAC	AT5G50670.1	SPL13B	Squamosa promoter-binding protein-like (SBP domain) transcription factor family protein	13.641	949	969
			o||||||||||o|||||||o|
			UACUGUCUUCUCUCUCUCGCG
ptc-miR156j	POPTR_0014s04170.1|PACid:18223645	3	UUGACAGAAGAUAGAGAGCAC	AT1G80950.1		Phospholipid/glycerol acyltransferase family protein	14.997	970	990
			|||||||||.|o|o|||.|||
			AACUGUCUUUUCUAUCUUGUG
ptc-miR156j	POPTR_0001s38770.1|PACid:18235775	3.5	UUGACAGAAGAUAGAGAGCA	AT1G17120.1	CAT8	cationic amino acid transporter 8	16.646	431	450
			o|.|||.||.|.|||.||||
			CAUUGUUUUUUGUCUUUCGU
ptc-miR156j	POPTR_0003s15340.1|PACid:18217028	3	UUGACAGAAGAUAGAGAGCA	AT2G34960.1	CAT5	cationic amino acid transporter 5	22.699	365	384
			o|.||||||o|.||||||||
			CAUUGUCUUAUGUCUCUCGU
ptc-miR156j	POPTR_0001s12180.1|PACid:18235280	3	UUGACAGAAGAUAGAGAGCA	AT2G34960.1	CAT5	cationic amino acid transporter 5	19.415	296	315
			o|.||||||o|.||||||||
			CAUUGUCUUAUGUCUCUCGU
ptc-miR156k	POPTR_0010s16400.1|PACid:18242283	0.5	UGACAGAAGAGAGGGAGCAC	AT1G69170.1		Squamosa promoter-binding protein-like (SBP domain) transcription factor family protein	21.097	1175	1194
			|||||||||||||.||||||
			ACUGUCUUCUCUCUCUCGUG
ptc-miR156k	POPTR_0008s09750.1|PACid:18247435	0.5	UGACAGAAGAGAGGGAGCAC	AT1G69170.1		Squamosa promoter-binding protein-like (SBP domain) transcription factor family protein	21.579	1088	1107
			|||||||||||||.||||||
			ACUGUCUUCUCUCUCUCGUG
ptc-miR156k	POPTR_0003s17120.1|PACid:18217293	0.5	UGACAGAAGAGAGGGAGCAC	AT5G43270.1	SPL2	squamosa promoter binding protein-like 2	9.239	1169	1188
			|||||||||||||.||||||
			ACUGUCUUCUCUCUCUCGUG
ptc-miR156k	POPTR_0018s14680.2|PACid:18215571	0.5	UGACAGAAGAGAGGGAGCAC	AT5G43270.1	SPL2	squamosa promoter binding protein-like 2	20.138	1127	1146
			|||||||||||||.||||||
			ACUGUCUUCUCUCUCUCGUG
ptc-miR156k	POPTR_0018s14680.1|PACid:18215570	0.5	UGACAGAAGAGAGGGAGCAC	AT5G43270.1	SPL2	squamosa promoter binding protein-like 2	20.138	1127	1146
			|||||||||||||.||||||
			ACUGUCUUCUCUCUCUCGUG
ptc-miR156k	POPTR_0018s14680.3|PACid:18215572	0.5	UGACAGAAGAGAGGGAGCAC	AT5G43270.1	SPL2	squamosa promoter binding protein-like 2	20.138	1127	1146
			|||||||||||||.||||||
			ACUGUCUUCUCUCUCUCGUG
ptc-miR156k	POPTR_0001s13890.1|PACid:18239288	0.5	UGACAGAAGAGAGGGAGCAC	AT5G43270.1	SPL2	squamosa promoter binding protein-like 2	14.052	1106	1125
			|||||||||||||.||||||
			ACUGUCUUCUCUCUCUCGUG
ptc-miR156k	POPTR_0014s05690.1|PACid:18223901	0.5	UGACAGAAGAGAGGGAGCAC	AT1G27370.1	SPL10	squamosa promoter binding protein-like 10	15.354	830	849
			|||||||||||||.||||||
			ACUGUCUUCUCUCUCUCGUG
ptc-miR156k	POPTR_0002s14330.1|PACid:18244437	0.5	UGACAGAAGAGAGGGAGCAC	AT1G27360.1	SPL11	squamosa promoter-like 11	15.86	809	828
			|||||||||||||.||||||
			ACUGUCUUCUCUCUCUCGUG
ptc-miR156k	POPTR_0015s11100.1|PACid:18232812	0.5	UGACAGAAGAGAGGGAGCAC	AT5G50670.1	SPL13B	Squamosa promoter-binding protein-like (SBP domain) transcription factor family protein	14.776	899	918
			|||||||||||||.||||||
			ACUGUCUUCUCUCUCUCGUG
ptc-miR156k	POPTR_0001s13630.1|PACid:18234979	0.5	UGACAGAAGAGAGGGAGCAC	AT5G50670.1	SPL13B	Squamosa promoter-binding protein-like (SBP domain) transcription factor family protein	12.661	857	876
			|||||||||||||.||||||
			ACUGUCUUCUCUCUCUCGUG
ptc-miR156k	POPTR_0003s16780.1|PACid:18216841	0.5	UGACAGAAGAGAGGGAGCAC	AT5G50670.1	SPL13B	Squamosa promoter-binding protein-like (SBP domain) transcription factor family protein	12.612	668	687
			|||||||||||||.||||||
			ACUGUCUUCUCUCUCUCGUG
ptc-miR156k	POPTR_0016s04890.1|PACid:18249881	0.5	UGACAGAAGAGAGGGAGCAC	AT2G42200.1	SPL9	squamosa promoter binding protein-like 9	17.571	425	444
			|||||||||||||.||||||
			ACUGUCUUCUCUCUCUCGUG
ptc-miR156k	POPTR_0015s07140.1|PACid:18232622	1	UGACAGAAGAGAGGGAGCAC	AT1G69170.1		Squamosa promoter-binding protein-like (SBP domain) transcription factor family protein	18.114	1238	1257
			|||||||||||||o||||||
			ACUGUCUUCUCUCGCUCGUG
ptc-miR156k	POPTR_0011s05490.1|PACid:18232063	1.5	UGACAGAAGAGAGGGAGCAC				12.946	193	212
			|||||||||||||.|||||o
			ACUGUCUUCUCUCUCUCGUA
ptc-miR156k	POPTR_0012s10260.1|PACid:18229814	1.5	UGACAGAAGAGAGGGAGCAC	AT5G50670.1	SPL13B	Squamosa promoter-binding protein-like (SBP domain) transcription factor family protein	15.102	949	968
			|||||||||||||.||||o|
			ACUGUCUUCUCUCUCUCGCG
ptc-miR156k	POPTR_0014s04170.1|PACid:18223645	2.5	UGACAGAAGAGAGGGAGCAC	AT1G80950.1		Phospholipid/glycerol acyltransferase family protein	14.972	970	989
			||||||||.|||o.||.|||
			ACUGUCUUUUCUAUCUUGUG
ptc-miR156k	POPTR_0012s08950.1|PACid:18229278	3	UGACAGAAGAGAGGGAGCAC	AT1G12940.1	NRT2.5	nitrate transporter2.5	19.962	1084	1103
			||o|||||||.||.||.|||
			ACCGUCUUCUUUCUCUUGUG
ptc-miR156k	POPTR_0018s02270.1|PACid:18215314	3	UGACAGAAGAGAGGGAGCAC	AT2G18950.1	HPT1	homogentisate phytyltransferase 1	16.211	429	448
			||||||o|||.|.|.|||||
			ACUGUCGUCUUUUCUUCGUG
ptc-miR156k	POPTR_0008s07570.1|PACid:18249693	3.5	UGACAGAAGAGAGGGAGCAC	AT5G36170.1	HCF109	high chlorophyll fluorescent 109	12.919	162	181
			|.||||||||.|.|||||oo
			AUUGUCUUCUUUUCCUCGCU
ptc-miR156k	POPTR_0014s16720.1|PACid:18222603	3.5	UGACAGAAGAGAGGGAGCAC	AT3G07670.1		Rubisco methyltransferase family protein	21.702	120	139
			o|||o||||||||..|||||
			UCUGACUUCUCUCUUUCGUG
ptc-miR156k	POPTR_0010s06830.1|PACid:18240565	3.5	UGACAGAAGAGAGGGAGCAC	AT1G67510.1		Leucine-rich repeat protein kinase family protein	15.409	70	89
			|||o||||||||..|||||o
			ACUUUCUUCUCUUUCUCGUC
ptc-miR156k	POPTR_0008s16230.1|PACid:18248112	3.5	UGACAGAAGAGAGGGAGCAC	AT1G06750.2		P-loop containing nucleoside triphosphate hydrolases superfamily protein	18.728	1315	1334
			o||o||||||||.|.|||||
			UCUUUCUUCUCUUCUUCGUG
ptc-miR156k	POPTR_0018s02070.1|PACid:18214742	3	UGACAGAAGAGAGGGAGCAC				16.855	39	58
			|||o||||||||||.|||o|
			ACUCUCUUCUCUCCUUCGGG
ptc-miR156k	POPTR_0006s12880.1|PACid:18212087	5	UGACAGAAGAGAGGGAGCAC				9.728	223	242
			o.o|||||.||||.||||||
			CUGGUCUUUUCUCUCUCGUG
ptc-miR159b	POPTR_0010s16520.1|PACid:18239702	1.5	UUUGGAUUGAAGGGAGCUCU	AT2G03667.1		Asparagine synthase family protein	14.699	910	929
			|||||||||||.|.|.||||
			AAACCUAACUUUCUUUGAGA
ptc-miR159b	POPTR_0011s12790.1|PACid:18232088	2	UUUGGAUUGAAGGGAGCUCU				18.178	573	592
			||o|||||||||.|||||||
			AACCCUAACUUCUCUCGAGA
ptc-miR159b	POPTR_0009s02380.1|PACid:18227868	2.5	UUUGGAUUGAAGGGAGCUCU	AT5G06100.2	MYB33	myb domain protein 33	18.544	966	985
			o|||||o|||||||||||||
			UAACCUCACUUCCCUCGAGA
ptc-miR159b	POPTR_0001s23170.1|PACid:18238390	2.5	UUUGGAUUGAAGGGAGCUCU	AT3G11440.1	MYB65	myb domain protein 65	16.174	1077	1096
			o|||||o|||||||||||||
			UAACCUCACUUCCCUCGAGA
ptc-miR159b	POPTR_0014s05420.1|PACid:18223082	2	UUUGGAUUGAAGGGAGCUCU	AT3G60460.1	DUO1	myb-like HTH transcriptional regulator family protein	22.98	101	120
			|||||||.|||o|||||||.
			AAACCUAGCUUACCUCGAGG
ptc-miR159b	POPTR_0014s05370.1|PACid:18224032	2	UUUGGAUUGAAGGGAGCUCU	AT3G60460.1	DUO1	myb-like HTH transcriptional regulator family protein	22.98	101	120
			|||||||.|||o|||||||.
			AAACCUAGCUUACCUCGAGG
ptc-miR159b	POPTR_0001s07330.2|PACid:18234459	3	UUUGGAUUGAAGGGAGCUCU	AT5G06100.2	MYB33	myb domain protein 33	21.32	954	973
			o|||||o||||||||||||.
			UAACCUCACUUCCCUCGAGG
ptc-miR159b	POPTR_0001s07330.1|PACid:18234458	3	UUUGGAUUGAAGGGAGCUCU	AT3G11440.1	MYB65	myb domain protein 65	21.32	954	973
			o|||||o||||||||||||.
			UAACCUCACUUCCCUCGAGG
ptc-miR159b	POPTR_0001s05150.1|PACid:18238427	2.5	UUUGGAUUGAAGGGAGCUCU	AT5G13020.1		Emsy N Terminus (ENT)/ plant Tudor-like domains-containing protein	14.046	972	991
			|.||||||.||||||.o|||
			AGACCUAAUUUCCCUUUAGA
ptc-miR159b	POPTR_0003s18900.2|PACid:18216193	3.5	UUUGGAUUGAAGGGAGCUCU	AT5G06100.2	MYB33	myb domain protein 33	20.667	954	973
			o|||||o||||||||||||o
			UAACCUCACUUCCCUCGAGU
ptc-miR159b	POPTR_0003s18900.1|PACid:18216192	3.5	UUUGGAUUGAAGGGAGCUCU	AT5G06100.2	MYB33	myb domain protein 33	20.667	954	973
			o|||||o||||||||||||o
			UAACCUCACUUCCCUCGAGU
ptc-miR159b	POPTR_0003s13930.1|PACid:18218194	3.5	UUUGGAUUGAAGGGAGCUCU				14.106	396	415
			|||||||||||...|.|.|o
			AAACCUAACUUUUUUUGGGU
ptc-miR159b	POPTR_0013s14200.1|PACid:18220958	3.5	UUUGGAUUGAAGGGAGCUCU	AT2G20830.2		transferases;folic acid binding	24.886	1068	1087
			.|||.|.||||||.|||.|o
			GAACUUGACUUCCUUCGGGC
ptc-miR159b	POPTR_0002s14180.1|PACid:18246049	3	UUUGGAUUGAAGGGAGCUCU	AT3G60460.1	DUO1	myb-like HTH transcriptional regulator family protein	17.797	119	138
			||||||..|||o.||||||.
			AAACCUGGCUUAUCUCGAGG
ptc-miR159b	POPTR_0001s38460.1|PACid:18238723	3	UUUGGAUUGAAGGGAGCUCU	AT4G27330.1	SPL	sporocyteless (SPL)	12.241	657	676
			|||||o||||||||o||||.
			AAACCAAACUUCCCCCGAGG
ptc-miR159b	POPTR_0006s04650.1|PACid:18211314	2.5	UUUGGAUUGAAGGGAGCUCU	AT2G41510.1	CKX1	cytokinin oxidase/dehydrogenase 1	12.703	925	944
			|||||||||||||.o|o|||
			AAACCUAACUUCCUCCUAGA
ptc-miR159b	POPTR_0016s04340.1|PACid:18250432	2.5	UUUGGAUUGAAGGGAGCUCU	AT2G41510.1	CKX1	cytokinin oxidase/dehydrogenase 1	18.534	928	947
			|||||||||||||.o|o|||
			AAACCUAACUUCCUCCUAGA
ptc-miR159b	POPTR_0007s03430.1|PACid:18243636	4	UUUGGAUUGAAGGGAGCUCU	AT5G60440.1	AGL62	AGAMOUS-like 62	14.171	868	887
			||||.|.||||.|||||.o.
			AAACUUGACUUUCCUCGGUG
ptc-miR159b	POPTR_0013s10050.1|PACid:18220520	3.5	UUUGGAUUGAAGGGAGCUCU	AT1G72190.1		D-isomer specific 2-hydroxyacid dehydrogenase family protein	19.853	698	717
			o|||||||||||.||.|.o|
			UAACCUAACUUCUCUUGGAA
ptc-miR159b	POPTR_0005s10140.1|PACid:18206794	4	UUUGGAUUGAAGGGAGCUCU	AT4G35470.1	PIRL4	plant intracellular ras group-related LRR 4	14.108	230	249
			|||||o|||||...|||||o
			AAACCAAACUUUUUUCGAGU
ptc-miR159b	POPTR_0006s08570.1|PACid:18213382	3.5	UUUGGAUUGAAGGGAGCUCU	AT5G02320.1	MYB3R-5	myb domain protein 3r-5	22.445	116	135
			||..||||||o.|||||||o
			AAGUCUAACUCUCCUCGAGC
ptc-miR159b	POPTR_0014s09090.1|PACid:18223819	4	UUUGGAUUGAAGGGAGCUCU	AT1G64300.1		Protein kinase family protein	15.143	1146	1165
			|.|o||||||||.||||.|o
			AGAACUAACUUCUCUCGGGC
ptc-miR159c	POPTR_0010s16520.1|PACid:18239702	1.5	UUUGGAUUGAAGGGAGCUCU	AT2G03667.1		Asparagine synthase family protein	14.699	910	929
			|||||||||||.|.|.||||
			AAACCUAACUUUCUUUGAGA
ptc-miR159c	POPTR_0011s12790.1|PACid:18232088	2	UUUGGAUUGAAGGGAGCUCU				18.178	573	592
			||o|||||||||.|||||||
			AACCCUAACUUCUCUCGAGA
ptc-miR159c	POPTR_0009s02380.1|PACid:18227868	2.5	UUUGGAUUGAAGGGAGCUCU	AT5G06100.2	MYB33	myb domain protein 33	18.544	966	985
			o|||||o|||||||||||||
			UAACCUCACUUCCCUCGAGA
ptc-miR159c	POPTR_0001s23170.1|PACid:18238390	2.5	UUUGGAUUGAAGGGAGCUCU	AT3G11440.1	MYB65	myb domain protein 65	16.174	1077	1096
			o|||||o|||||||||||||
			UAACCUCACUUCCCUCGAGA
ptc-miR159c	POPTR_0014s05420.1|PACid:18223082	2	UUUGGAUUGAAGGGAGCUCU	AT3G60460.1	DUO1	myb-like HTH transcriptional regulator family protein	22.98	101	120
			|||||||.|||o|||||||.
			AAACCUAGCUUACCUCGAGG
ptc-miR159c	POPTR_0014s05370.1|PACid:18224032	2	UUUGGAUUGAAGGGAGCUCU	AT3G60460.1	DUO1	myb-like HTH transcriptional regulator family protein	22.98	101	120
			|||||||.|||o|||||||.
			AAACCUAGCUUACCUCGAGG
ptc-miR159c	POPTR_0001s07330.2|PACid:18234459	3	UUUGGAUUGAAGGGAGCUCU	AT5G06100.2	MYB33	myb domain protein 33	21.32	954	973
			o|||||o||||||||||||.
			UAACCUCACUUCCCUCGAGG
ptc-miR159c	POPTR_0001s07330.1|PACid:18234458	3	UUUGGAUUGAAGGGAGCUCU	AT3G11440.1	MYB65	myb domain protein 65	21.32	954	973
			o|||||o||||||||||||.
			UAACCUCACUUCCCUCGAGG
ptc-miR159c	POPTR_0001s05150.1|PACid:18238427	2.5	UUUGGAUUGAAGGGAGCUCU	AT5G13020.1		Emsy N Terminus (ENT)/ plant Tudor-like domains-containing protein	14.046	972	991
			|.||||||.||||||.o|||
			AGACCUAAUUUCCCUUUAGA
ptc-miR159c	POPTR_0003s18900.2|PACid:18216193	3.5	UUUGGAUUGAAGGGAGCUCU	AT5G06100.2	MYB33	myb domain protein 33	20.667	954	973
			o|||||o||||||||||||o
			UAACCUCACUUCCCUCGAGU
ptc-miR159c	POPTR_0003s18900.1|PACid:18216192	3.5	UUUGGAUUGAAGGGAGCUCU	AT5G06100.2	MYB33	myb domain protein 33	20.667	954	973
			o|||||o||||||||||||o
			UAACCUCACUUCCCUCGAGU
ptc-miR159c	POPTR_0003s13930.1|PACid:18218194	3.5	UUUGGAUUGAAGGGAGCUCU				14.106	396	415
			|||||||||||...|.|.|o
			AAACCUAACUUUUUUUGGGU
ptc-miR159c	POPTR_0013s14200.1|PACid:18220958	3.5	UUUGGAUUGAAGGGAGCUCU	AT2G20830.2		transferases;folic acid binding	24.886	1068	1087
			.|||.|.||||||.|||.|o
			GAACUUGACUUCCUUCGGGC
ptc-miR159c	POPTR_0002s14180.1|PACid:18246049	3	UUUGGAUUGAAGGGAGCUCU	AT3G60460.1	DUO1	myb-like HTH transcriptional regulator family protein	17.797	119	138
			||||||..|||o.||||||.
			AAACCUGGCUUAUCUCGAGG
ptc-miR159c	POPTR_0001s38460.1|PACid:18238723	3	UUUGGAUUGAAGGGAGCUCU	AT4G27330.1	SPL	sporocyteless (SPL)	12.241	657	676
			|||||o||||||||o||||.
			AAACCAAACUUCCCCCGAGG
ptc-miR159c	POPTR_0006s04650.1|PACid:18211314	2.5	UUUGGAUUGAAGGGAGCUCU	AT2G41510.1	CKX1	cytokinin oxidase/dehydrogenase 1	12.703	925	944
			|||||||||||||.o|o|||
			AAACCUAACUUCCUCCUAGA
ptc-miR159c	POPTR_0016s04340.1|PACid:18250432	2.5	UUUGGAUUGAAGGGAGCUCU	AT2G41510.1	CKX1	cytokinin oxidase/dehydrogenase 1	18.534	928	947
			|||||||||||||.o|o|||
			AAACCUAACUUCCUCCUAGA
ptc-miR159c	POPTR_0007s03430.1|PACid:18243636	4	UUUGGAUUGAAGGGAGCUCU	AT5G60440.1	AGL62	AGAMOUS-like 62	14.171	868	887
			||||.|.||||.|||||.o.
			AAACUUGACUUUCCUCGGUG
ptc-miR159c	POPTR_0013s10050.1|PACid:18220520	3.5	UUUGGAUUGAAGGGAGCUCU	AT1G72190.1		D-isomer specific 2-hydroxyacid dehydrogenase family protein	19.853	698	717
			o|||||||||||.||.|.o|
			UAACCUAACUUCUCUUGGAA
ptc-miR159c	POPTR_0005s10140.1|PACid:18206794	4	UUUGGAUUGAAGGGAGCUCU	AT4G35470.1	PIRL4	plant intracellular ras group-related LRR 4	14.108	230	249
			|||||o|||||...|||||o
			AAACCAAACUUUUUUCGAGU
ptc-miR159c	POPTR_0006s08570.1|PACid:18213382	3.5	UUUGGAUUGAAGGGAGCUCU	AT5G02320.1	MYB3R-5	myb domain protein 3r-5	22.445	116	135
			||..||||||o.|||||||o
			AAGUCUAACUCUCCUCGAGC
ptc-miR159c	POPTR_0014s09090.1|PACid:18223819	4	UUUGGAUUGAAGGGAGCUCU	AT1G64300.1		Protein kinase family protein	15.143	1146	1165
			|.|o||||||||.||||.|o
			AGAACUAACUUCUCUCGGGC
ptc-miR160a	POPTR_0005s16320.1|PACid:18208076	0.5	UGCCUGGCUCCCUGUAUGCCA	AT1G77850.1	ARF17	auxin response factor 17	19.571	1305	1325
			||||||||||||||.||||||
			ACGGACCGAGGGACGUACGGU
ptc-miR160a	POPTR_0002s09050.1|PACid:18245253	0.5	UGCCUGGCUCCCUGUAUGCCA	AT1G77850.1	ARF17	auxin response factor 17	20.307	1311	1331
			||||||||||||||.||||||
			ACGGACCGAGGGACGUACGGU
ptc-miR160a	POPTR_0016s09150.1|PACid:18249918	0.5	UGCCUGGCUCCCUGUAUGCCA	AT4G30080.1	ARF16	auxin response factor 16	20.365	1368	1388
			||||||||||||||.||||||
			ACGGACCGAGGGACGUACGGU
ptc-miR160a	POPTR_0006s12930.1|PACid:18212166	0.5	UGCCUGGCUCCCUGUAUGCCA	AT4G30080.1	ARF16	auxin response factor 16	20.644	1368	1388
			||||||||||||||.||||||
			ACGGACCGAGGGACGUACGGU
ptc-miR160a	POPTR_0010s23000.1|PACid:18240058	0	UGCCUGGCUCCCUGUAUGCC	AT4G30080.1	ARF16	auxin response factor 16	22.111	1402	1421
			||||||||||||||||||||
			ACGGACCGAGGGACAUACGG
ptc-miR160a	POPTR_0008s03890.1|PACid:18247557	0	UGCCUGGCUCCCUGUAUGCC	AT4G30080.1	ARF16	auxin response factor 16	18.914	1405	1424
			||||||||||||||||||||
			ACGGACCGAGGGACAUACGG
ptc-miR160a	POPTR_0011s15700.1|PACid:18232069	4	UGCCUGGCUCCCUGUAUGCCA				22.928	50	70
			|||o|||||||o.|.|.||||
			ACGAACCGAGGAGCGUGCGGU
ptc-miR160a	POPTR_0009s16620.1|PACid:18228574	5	UGCCUGGCUCCCUGUAUGCCA	AT3G44510.2		alpha/beta-Hydrolases superfamily protein	22.36	104	124
			.o|||o||||||||||o||||
			GAGGAACGAGGGACAUUCGGU
ptc-miR160a	POPTR_0016s09340.1|PACid:18250535	4	UGCCUGGCUCCCUGUAUGCC	AT1G70280.2		NHL domain-containing protein	20.78	650	669
			|||||||||||||o|||ooo
			ACGGACCGAGGGAGAUAGAU
ptc-miR160a	POPTR_0008s13720.2|PACid:18248329	3	UGCCUGGCUCCCUGUAUGCC	AT2G01830.2	WOL	CHASE domain containing histidine kinase protein	20.897	2717	2736
			||||||||||o|..|o||||
			ACGGACCGAGAGGUAGACGG
ptc-miR160a	POPTR_0008s13720.1|PACid:18248328	3	UGCCUGGCUCCCUGUAUGCC	AT2G01830.2	WOL	CHASE domain containing histidine kinase protein	20.897	2720	2739
			||||||||||o|..|o||||
			ACGGACCGAGAGGUAGACGG
ptc-miR160a	POPTR_0010s11350.1|PACid:18241249	3	UGCCUGGCUCCCUGUAUGCC	AT2G01830.2	WOL	CHASE domain containing histidine kinase protein	19.17	2780	2799
			||||||||||o|..|o||||
			ACGGACCGAGAGGUAGACGG
ptc-miR160a	POPTR_0014s01010.1|PACid:18223799	4	UGCCUGGCUCCCUGUAUGCCA	AT5G67580.1	TRB2	Homeodomain-like/winged-helix DNA-binding family protein	18.975	177	197
			|||||||o.|||..|||.o||
			ACGGACCUGGGGGUAUAUCGU
ptc-miR160a	POPTR_0001s22260.1|PACid:18234343	3.5	UGCCUGGCUCCCUGUAUGCCA	AT3G22190.1	IQD5	IQ-domain 5	21.858	1179	1199
			|||||||||o||||oo.||||
			ACGGACCGAUGGACUCGCGGU
ptc-miR160a	POPTR_0004s16850.1|PACid:18225092	4	UGCCUGGCUCCCUGUAUGCCA	AT4G10520.1		Subtilase family protein	16.535	1409	1429
			|||o||.||||o||||||o||
			ACGAACUGAGGUACAUACAGU
ptc-miR160a	POPTR_0017s06020.1|PACid:18210464	3.5	UGCCUGGCUCCCUGUAUGCC	AT2G43320.1		S-adenosyl-L-methionine-dependent methyltransferases superfamily protein	19.768	767	786
			||||.|||||||||o|o||o
			ACGGGCCGAGGGACUUUCGA
ptc-miR160a	POPTR_0007s12750.1|PACid:18243249	4	UGCCUGGCUCCCUGUAUGCC	AT5G66760.1	SDH1-1	succinate dehydrogenase 1-1	23.306	859	878
			..||..||.||o|.||||||
			GUGGGUCGGGGUAUAUACGG
ptc-miR160a	POPTR_0001s01410.1|PACid:18239104	4	UGCCUGGCUCCCUGUAUGCCA	AT1G31880.1	BRX	DZC (Disease resistance/zinc finger/chromosome condensation-like region) domain containing protein	18.028	392	412
			.||||||||||o.o|o|||||
			GCGGACCGAGGUGGACACGGU
ptc-miR160a	POPTR_0010s16490.2|PACid:18242333	5	UGCCUGGCUCCCUGUAUGCC	AT1G69220.1	SIK1	Protein kinase superfamily protein	14.861	567	586
			oo|||.||||||.|o|.|||
			UGGGAUCGAGGGGCCUGCGG
ptc-miR160a	POPTR_0010s16490.1|PACid:18242332	5	UGCCUGGCUCCCUGUAUGCC	AT1G69220.1	SIK1	Protein kinase superfamily protein	14.861	567	586
			oo|||.||||||.|o|.|||
			UGGGAUCGAGGGGCCUGCGG
ptc-miR160b	POPTR_0005s16320.1|PACid:18208076	0.5	UGCCUGGCUCCCUGUAUGCCA	AT1G77850.1	ARF17	auxin response factor 17	19.571	1305	1325
			||||||||||||||.||||||
			ACGGACCGAGGGACGUACGGU
ptc-miR160b	POPTR_0002s09050.1|PACid:18245253	0.5	UGCCUGGCUCCCUGUAUGCCA	AT1G77850.1	ARF17	auxin response factor 17	20.307	1311	1331
			||||||||||||||.||||||
			ACGGACCGAGGGACGUACGGU
ptc-miR160b	POPTR_0016s09150.1|PACid:18249918	0.5	UGCCUGGCUCCCUGUAUGCCA	AT4G30080.1	ARF16	auxin response factor 16	20.365	1368	1388
			||||||||||||||.||||||
			ACGGACCGAGGGACGUACGGU
ptc-miR160b	POPTR_0006s12930.1|PACid:18212166	0.5	UGCCUGGCUCCCUGUAUGCCA	AT4G30080.1	ARF16	auxin response factor 16	20.644	1368	1388
			||||||||||||||.||||||
			ACGGACCGAGGGACGUACGGU
ptc-miR160b	POPTR_0010s23000.1|PACid:18240058	0	UGCCUGGCUCCCUGUAUGCC	AT4G30080.1	ARF16	auxin response factor 16	22.111	1402	1421
			||||||||||||||||||||
			ACGGACCGAGGGACAUACGG
ptc-miR160b	POPTR_0008s03890.1|PACid:18247557	0	UGCCUGGCUCCCUGUAUGCC	AT4G30080.1	ARF16	auxin response factor 16	18.914	1405	1424
			||||||||||||||||||||
			ACGGACCGAGGGACAUACGG
ptc-miR160b	POPTR_0011s15700.1|PACid:18232069	4	UGCCUGGCUCCCUGUAUGCCA				22.928	50	70
			|||o|||||||o.|.|.||||
			ACGAACCGAGGAGCGUGCGGU
ptc-miR160b	POPTR_0009s16620.1|PACid:18228574	5	UGCCUGGCUCCCUGUAUGCCA	AT3G44510.2		alpha/beta-Hydrolases superfamily protein	22.36	104	124
			.o|||o||||||||||o||||
			GAGGAACGAGGGACAUUCGGU
ptc-miR160b	POPTR_0016s09340.1|PACid:18250535	4	UGCCUGGCUCCCUGUAUGCC	AT1G70280.2		NHL domain-containing protein	20.78	650	669
			|||||||||||||o|||ooo
			ACGGACCGAGGGAGAUAGAU
ptc-miR160b	POPTR_0008s13720.2|PACid:18248329	3	UGCCUGGCUCCCUGUAUGCC	AT2G01830.2	WOL	CHASE domain containing histidine kinase protein	20.897	2717	2736
			||||||||||o|..|o||||
			ACGGACCGAGAGGUAGACGG
ptc-miR160b	POPTR_0008s13720.1|PACid:18248328	3	UGCCUGGCUCCCUGUAUGCC	AT2G01830.2	WOL	CHASE domain containing histidine kinase protein	20.897	2720	2739
			||||||||||o|..|o||||
			ACGGACCGAGAGGUAGACGG
ptc-miR160b	POPTR_0010s11350.1|PACid:18241249	3	UGCCUGGCUCCCUGUAUGCC	AT2G01830.2	WOL	CHASE domain containing histidine kinase protein	19.17	2780	2799
			||||||||||o|..|o||||
			ACGGACCGAGAGGUAGACGG
ptc-miR160b	POPTR_0014s01010.1|PACid:18223799	4	UGCCUGGCUCCCUGUAUGCCA	AT5G67580.1	TRB2	Homeodomain-like/winged-helix DNA-binding family protein	18.975	177	197
			|||||||o.|||..|||.o||
			ACGGACCUGGGGGUAUAUCGU
ptc-miR160b	POPTR_0001s22260.1|PACid:18234343	3.5	UGCCUGGCUCCCUGUAUGCCA	AT3G22190.1	IQD5	IQ-domain 5	21.858	1179	1199
			|||||||||o||||oo.||||
			ACGGACCGAUGGACUCGCGGU
ptc-miR160b	POPTR_0004s16850.1|PACid:18225092	4	UGCCUGGCUCCCUGUAUGCCA	AT4G10520.1		Subtilase family protein	16.535	1409	1429
			|||o||.||||o||||||o||
			ACGAACUGAGGUACAUACAGU
ptc-miR160b	POPTR_0017s06020.1|PACid:18210464	3.5	UGCCUGGCUCCCUGUAUGCC	AT2G43320.1		S-adenosyl-L-methionine-dependent methyltransferases superfamily protein	19.768	767	786
			||||.|||||||||o|o||o
			ACGGGCCGAGGGACUUUCGA
ptc-miR160b	POPTR_0007s12750.1|PACid:18243249	4	UGCCUGGCUCCCUGUAUGCC	AT5G66760.1	SDH1-1	succinate dehydrogenase 1-1	23.306	859	878
			..||..||.||o|.||||||
			GUGGGUCGGGGUAUAUACGG
ptc-miR160b	POPTR_0001s01410.1|PACid:18239104	4	UGCCUGGCUCCCUGUAUGCCA	AT1G31880.1	BRX	DZC (Disease resistance/zinc finger/chromosome condensation-like region) domain containing protein	18.028	392	412
			.||||||||||o.o|o|||||
			GCGGACCGAGGUGGACACGGU
ptc-miR160b	POPTR_0010s16490.2|PACid:18242333	5	UGCCUGGCUCCCUGUAUGCC	AT1G69220.1	SIK1	Protein kinase superfamily protein	14.861	567	586
			oo|||.||||||.|o|.|||
			UGGGAUCGAGGGGCCUGCGG
ptc-miR160b	POPTR_0010s16490.1|PACid:18242332	5	UGCCUGGCUCCCUGUAUGCC	AT1G69220.1	SIK1	Protein kinase superfamily protein	14.861	567	586
			oo|||.||||||.|o|.|||
			UGGGAUCGAGGGGCCUGCGG
ptc-miR160c	POPTR_0005s16320.1|PACid:18208076	0.5	UGCCUGGCUCCCUGUAUGCCA	AT1G77850.1	ARF17	auxin response factor 17	19.571	1305	1325
			||||||||||||||.||||||
			ACGGACCGAGGGACGUACGGU
ptc-miR160c	POPTR_0002s09050.1|PACid:18245253	0.5	UGCCUGGCUCCCUGUAUGCCA	AT1G77850.1	ARF17	auxin response factor 17	20.307	1311	1331
			||||||||||||||.||||||
			ACGGACCGAGGGACGUACGGU
ptc-miR160c	POPTR_0016s09150.1|PACid:18249918	0.5	UGCCUGGCUCCCUGUAUGCCA	AT4G30080.1	ARF16	auxin response factor 16	20.365	1368	1388
			||||||||||||||.||||||
			ACGGACCGAGGGACGUACGGU
ptc-miR160c	POPTR_0006s12930.1|PACid:18212166	0.5	UGCCUGGCUCCCUGUAUGCCA	AT4G30080.1	ARF16	auxin response factor 16	20.644	1368	1388
			||||||||||||||.||||||
			ACGGACCGAGGGACGUACGGU
ptc-miR160c	POPTR_0010s23000.1|PACid:18240058	0	UGCCUGGCUCCCUGUAUGCC	AT4G30080.1	ARF16	auxin response factor 16	22.111	1402	1421
			||||||||||||||||||||
			ACGGACCGAGGGACAUACGG
ptc-miR160c	POPTR_0008s03890.1|PACid:18247557	0	UGCCUGGCUCCCUGUAUGCC	AT4G30080.1	ARF16	auxin response factor 16	18.914	1405	1424
			||||||||||||||||||||
			ACGGACCGAGGGACAUACGG
ptc-miR160c	POPTR_0011s15700.1|PACid:18232069	4	UGCCUGGCUCCCUGUAUGCCA				22.928	50	70
			|||o|||||||o.|.|.||||
			ACGAACCGAGGAGCGUGCGGU
ptc-miR160c	POPTR_0009s16620.1|PACid:18228574	5	UGCCUGGCUCCCUGUAUGCCA	AT3G44510.2		alpha/beta-Hydrolases superfamily protein	22.36	104	124
			.o|||o||||||||||o||||
			GAGGAACGAGGGACAUUCGGU
ptc-miR160c	POPTR_0016s09340.1|PACid:18250535	4	UGCCUGGCUCCCUGUAUGCC	AT1G70280.2		NHL domain-containing protein	20.78	650	669
			|||||||||||||o|||ooo
			ACGGACCGAGGGAGAUAGAU
ptc-miR160c	POPTR_0008s13720.2|PACid:18248329	3	UGCCUGGCUCCCUGUAUGCC	AT2G01830.2	WOL	CHASE domain containing histidine kinase protein	20.897	2717	2736
			||||||||||o|..|o||||
			ACGGACCGAGAGGUAGACGG
ptc-miR160c	POPTR_0008s13720.1|PACid:18248328	3	UGCCUGGCUCCCUGUAUGCC	AT2G01830.2	WOL	CHASE domain containing histidine kinase protein	20.897	2720	2739
			||||||||||o|..|o||||
			ACGGACCGAGAGGUAGACGG
ptc-miR160c	POPTR_0010s11350.1|PACid:18241249	3	UGCCUGGCUCCCUGUAUGCC	AT2G01830.2	WOL	CHASE domain containing histidine kinase protein	19.17	2780	2799
			||||||||||o|..|o||||
			ACGGACCGAGAGGUAGACGG
ptc-miR160c	POPTR_0014s01010.1|PACid:18223799	4	UGCCUGGCUCCCUGUAUGCCA	AT5G67580.1	TRB2	Homeodomain-like/winged-helix DNA-binding family protein	18.975	177	197
			|||||||o.|||..|||.o||
			ACGGACCUGGGGGUAUAUCGU
ptc-miR160c	POPTR_0001s22260.1|PACid:18234343	3.5	UGCCUGGCUCCCUGUAUGCCA	AT3G22190.1	IQD5	IQ-domain 5	21.858	1179	1199
			|||||||||o||||oo.||||
			ACGGACCGAUGGACUCGCGGU
ptc-miR160c	POPTR_0004s16850.1|PACid:18225092	4	UGCCUGGCUCCCUGUAUGCCA	AT4G10520.1		Subtilase family protein	16.535	1409	1429
			|||o||.||||o||||||o||
			ACGAACUGAGGUACAUACAGU
ptc-miR160c	POPTR_0017s06020.1|PACid:18210464	3.5	UGCCUGGCUCCCUGUAUGCC	AT2G43320.1		S-adenosyl-L-methionine-dependent methyltransferases superfamily protein	19.768	767	786
			||||.|||||||||o|o||o
			ACGGGCCGAGGGACUUUCGA
ptc-miR160c	POPTR_0007s12750.1|PACid:18243249	4	UGCCUGGCUCCCUGUAUGCC	AT5G66760.1	SDH1-1	succinate dehydrogenase 1-1	23.306	859	878
			..||..||.||o|.||||||
			GUGGGUCGGGGUAUAUACGG
ptc-miR160c	POPTR_0001s01410.1|PACid:18239104	4	UGCCUGGCUCCCUGUAUGCCA	AT1G31880.1	BRX	DZC (Disease resistance/zinc finger/chromosome condensation-like region) domain containing protein	18.028	392	412
			.||||||||||o.o|o|||||
			GCGGACCGAGGUGGACACGGU
ptc-miR160c	POPTR_0010s16490.2|PACid:18242333	5	UGCCUGGCUCCCUGUAUGCC	AT1G69220.1	SIK1	Protein kinase superfamily protein	14.861	567	586
			oo|||.||||||.|o|.|||
			UGGGAUCGAGGGGCCUGCGG
ptc-miR160c	POPTR_0010s16490.1|PACid:18242332	5	UGCCUGGCUCCCUGUAUGCC	AT1G69220.1	SIK1	Protein kinase superfamily protein	14.861	567	586
			oo|||.||||||.|o|.|||
			UGGGAUCGAGGGGCCUGCGG
ptc-miR160d	POPTR_0005s16320.1|PACid:18208076	0.5	UGCCUGGCUCCCUGUAUGCCA	AT1G77850.1	ARF17	auxin response factor 17	19.571	1305	1325
			||||||||||||||.||||||
			ACGGACCGAGGGACGUACGGU
ptc-miR160d	POPTR_0002s09050.1|PACid:18245253	0.5	UGCCUGGCUCCCUGUAUGCCA	AT1G77850.1	ARF17	auxin response factor 17	20.307	1311	1331
			||||||||||||||.||||||
			ACGGACCGAGGGACGUACGGU
ptc-miR160d	POPTR_0016s09150.1|PACid:18249918	0.5	UGCCUGGCUCCCUGUAUGCCA	AT4G30080.1	ARF16	auxin response factor 16	20.365	1368	1388
			||||||||||||||.||||||
			ACGGACCGAGGGACGUACGGU
ptc-miR160d	POPTR_0006s12930.1|PACid:18212166	0.5	UGCCUGGCUCCCUGUAUGCCA	AT4G30080.1	ARF16	auxin response factor 16	20.644	1368	1388
			||||||||||||||.||||||
			ACGGACCGAGGGACGUACGGU
ptc-miR160d	POPTR_0010s23000.1|PACid:18240058	0	UGCCUGGCUCCCUGUAUGCC	AT4G30080.1	ARF16	auxin response factor 16	22.111	1402	1421
			||||||||||||||||||||
			ACGGACCGAGGGACAUACGG
ptc-miR160d	POPTR_0008s03890.1|PACid:18247557	0	UGCCUGGCUCCCUGUAUGCC	AT4G30080.1	ARF16	auxin response factor 16	18.914	1405	1424
			||||||||||||||||||||
			ACGGACCGAGGGACAUACGG
ptc-miR160d	POPTR_0011s15700.1|PACid:18232069	4	UGCCUGGCUCCCUGUAUGCCA				22.928	50	70
			|||o|||||||o.|.|.||||
			ACGAACCGAGGAGCGUGCGGU
ptc-miR160d	POPTR_0009s16620.1|PACid:18228574	5	UGCCUGGCUCCCUGUAUGCCA	AT3G44510.2		alpha/beta-Hydrolases superfamily protein	22.36	104	124
			.o|||o||||||||||o||||
			GAGGAACGAGGGACAUUCGGU
ptc-miR160d	POPTR_0016s09340.1|PACid:18250535	4	UGCCUGGCUCCCUGUAUGCC	AT1G70280.2		NHL domain-containing protein	20.78	650	669
			|||||||||||||o|||ooo
			ACGGACCGAGGGAGAUAGAU
ptc-miR160d	POPTR_0008s13720.2|PACid:18248329	3	UGCCUGGCUCCCUGUAUGCC	AT2G01830.2	WOL	CHASE domain containing histidine kinase protein	20.897	2717	2736
			||||||||||o|..|o||||
			ACGGACCGAGAGGUAGACGG
ptc-miR160d	POPTR_0008s13720.1|PACid:18248328	3	UGCCUGGCUCCCUGUAUGCC	AT2G01830.2	WOL	CHASE domain containing histidine kinase protein	20.897	2720	2739
			||||||||||o|..|o||||
			ACGGACCGAGAGGUAGACGG
ptc-miR160d	POPTR_0010s11350.1|PACid:18241249	3	UGCCUGGCUCCCUGUAUGCC	AT2G01830.2	WOL	CHASE domain containing histidine kinase protein	19.17	2780	2799
			||||||||||o|..|o||||
			ACGGACCGAGAGGUAGACGG
ptc-miR160d	POPTR_0014s01010.1|PACid:18223799	4	UGCCUGGCUCCCUGUAUGCCA	AT5G67580.1	TRB2	Homeodomain-like/winged-helix DNA-binding family protein	18.975	177	197
			|||||||o.|||..|||.o||
			ACGGACCUGGGGGUAUAUCGU
ptc-miR160d	POPTR_0001s22260.1|PACid:18234343	3.5	UGCCUGGCUCCCUGUAUGCCA	AT3G22190.1	IQD5	IQ-domain 5	21.858	1179	1199
			|||||||||o||||oo.||||
			ACGGACCGAUGGACUCGCGGU
ptc-miR160d	POPTR_0004s16850.1|PACid:18225092	4	UGCCUGGCUCCCUGUAUGCCA	AT4G10520.1		Subtilase family protein	16.535	1409	1429
			|||o||.||||o||||||o||
			ACGAACUGAGGUACAUACAGU
ptc-miR160d	POPTR_0017s06020.1|PACid:18210464	3.5	UGCCUGGCUCCCUGUAUGCC	AT2G43320.1		S-adenosyl-L-methionine-dependent methyltransferases superfamily protein	19.768	767	786
			||||.|||||||||o|o||o
			ACGGGCCGAGGGACUUUCGA
ptc-miR160d	POPTR_0007s12750.1|PACid:18243249	4	UGCCUGGCUCCCUGUAUGCC	AT5G66760.1	SDH1-1	succinate dehydrogenase 1-1	23.306	859	878
			..||..||.||o|.||||||
			GUGGGUCGGGGUAUAUACGG
ptc-miR160d	POPTR_0001s01410.1|PACid:18239104	4	UGCCUGGCUCCCUGUAUGCCA	AT1G31880.1	BRX	DZC (Disease resistance/zinc finger/chromosome condensation-like region) domain containing protein	18.028	392	412
			.||||||||||o.o|o|||||
			GCGGACCGAGGUGGACACGGU
ptc-miR160d	POPTR_0010s16490.2|PACid:18242333	5	UGCCUGGCUCCCUGUAUGCC	AT1G69220.1	SIK1	Protein kinase superfamily protein	14.861	567	586
			oo|||.||||||.|o|.|||
			UGGGAUCGAGGGGCCUGCGG
ptc-miR160d	POPTR_0010s16490.1|PACid:18242332	5	UGCCUGGCUCCCUGUAUGCC	AT1G69220.1	SIK1	Protein kinase superfamily protein	14.861	567	586
			oo|||.||||||.|o|.|||
			UGGGAUCGAGGGGCCUGCGG
ptc-miR162a	POPTR_0002s18240.1|PACid:18245671	2	UCGAUAA-ACCUCUGCAUCCAG	AT1G01040.1	DCL1	dicer-like 1	23.665	3229	3250
			|||||||o||||||||||||||
			AGCUAUUCUGGAGACGUAGGUC
ptc-miR162a	POPTR_0016s07580.1|PACid:18250731	3	UCGAUAAACCUCUGCAUCCAG	AT3G11560.2		LETM1-like protein	18.214	1518	1538
			|o.|||||o||||||||||||
			AAUUAUUUCGAGACGUAGGUC
ptc-miR162a	POPTR_0003s14770.1|PACid:18218307	3	UCGAUAAACCUCUGCAUCCA	AT1G64690.1	BLT	branchless trichome	21.038	592	611
			||||.|||||.||o|||||o
			AGCUGUUUGGGGAAGUAGGG
ptc-miR162a	POPTR_0016s00290.1|PACid:18250750	4.5	UCGAUAAACCUCUGCAUCCAG	AT3G52155.1		Phosphoglycerate mutase family protein	12.785	463	483
			oo.||o||||||||||||||.
			CUUUACUUGGAGACGUAGGUU
ptc-miR162a	POPTR_0014s10610.1|PACid:18223893	4.5	UCGAUAAACCUCUGCAUCCAG	AT2G46920.1	POL	Protein phosphatase 2C family protein	19.279	708	728
			oo.|o|||||||||||||||.
			UUUUUUUUGGAGACGUAGGUU
ptc-miR162a	POPTR_0010s14990.1|PACid:18242029	3	UCGAUAAACCUCUGCAUCCAG	AT3G51550.1	FER	Malectin/receptor-like protein kinase family protein	16.861	1762	1782
			|||||||oo|||||o||||||
			AGCUAUUAUGAGACCUAGGUC
ptc-miR162a	POPTR_0011s16860.1|PACid:18231027	3	UCGAUAAACCUCUGCAUCCAG	AT3G51550.1	FER	Malectin/receptor-like protein kinase family protein	13.99	1813	1833
			|||||||oo|||||o||||||
			AGCUAUUAUGAGACCUAGGUC
ptc-miR162a	POPTR_0010s09210.1|PACid:18241482	4	UCGAUAAACCUCUGCAUCCAG	AT3G22830.1	HSFA6B	heat shock transcription factor A6B	11.112	466	486
			|||||o|||o||.o|||||||
			AGCUAGUUGAAGGGGUAGGUC
ptc-miR162a	POPTR_0019s14700.1|PACid:18219909	3.5	UCGAUAAACCUCUGCAUCCAG	AT2G25150.1		HXXXD-type acyl-transferase family protein	18.572	1223	1243
			|||o|||||||o|o||||||.
			AGCGAUUUGGAAAGGUAGGUU
ptc-miR162a	POPTR_0022s00530.1|PACid:18218550	3.5	UCGAUAAACCUCUGCAUCCAG	AT5G49910.1	CPHSC70-2EAT SHOCK PROTEIN 70-2	chloroplast heat shock protein 70-2	17.761	405	425
			.|.||||||||||o||.|o|.
			GGUUAUUUGGAGAAGUGGCUU
ptc-miR162a	POPTR_0004s23310.1|PACid:18226454	3.5	UCGAUAAACCUCUGCAUCCAG	AT5G49910.1	CPHSC70-2EAT SHOCK PROTEIN 70-2	chloroplast heat shock protein 70-2	19.355	585	605
			.|.||||||||||o||.|o|.
			GGUUAUUUGGAGAAGUGGCUU
ptc-miR162a	POPTR_0013s12010.1|PACid:18221243	4.5	UCGAUAAACCUCUGCAUCCAG	AT1G34300.1		lectin protein kinase family protein	21.72	1446	1466
			||oo||||||.||||o|||||
			AGGAAUUUGGGGACGCAGGUC
ptc-miR162a	POPTR_0010s01830.1|PACid:18242184	3.5	UCGAUAAACCUCUGCAUCCAG	AT5G49030.3	OVA2	tRNA synthetase class I (I, L, M and V) family protein	18.347	2587	2607
			|o|||||||||o|||o||||.
			AUCUAUUUGGAAACGGAGGUU
ptc-miR162a	POPTR_0019s11410.1|PACid:18219845	4	UCGAUAAACCUCUGCAUCCA	AT1G77855.1			18.254	536	555
			||o|||||||||.o|||||o
			AGAUAUUUGGAGGAGUAGGA
ptc-miR162a	POPTR_0008s06690.1|PACid:18247561	4	UCGAUAAACCUCUGCAUCCA	AT5G05700.1	ATE1	arginine-tRNA protein transferase 1	11.923	322	341
			||o|.||||||||||||o|o
			AGAUGUUUGGAGACGUAAGA
ptc-miR162a	POPTR_0010s05600.1|PACid:18240609	3.5	UCGAUAAACCUCUGCAUCCA	AT1G70610.1	TAP1	transporter associated with antigen processing protein 1	19.04	307	326
			||||||||o|||.|o||||o
			AGCUAUUUAGAGGCUUAGGA
ptc-miR162a	POPTR_0017s01750.1|PACid:18210129	4	UCGAUAAACCUCUGCAUCCA	AT3G57360.1			21.783	2	21
			.|.||o|o||||.|||||||
			GGUUAGUAGGAGGCGUAGGU
ptc-miR162a	POPTR_0002s09600.1|PACid:18246431	5	UCGAUAAACCUCUGCAUCCA	AT1G78160.1	PUM7	pumilio 7	16.121	1243	1262
			|||||o||||||||||.ooo
			AGCUAGUUGGAGACGUGAUG
ptc-miR162b	POPTR_0002s18240.1|PACid:18245671	2	UCGAUAA-ACCUCUGCAUCCAG	AT1G01040.1	DCL1	dicer-like 1	23.665	3229	3250
			|||||||o||||||||||||||
			AGCUAUUCUGGAGACGUAGGUC
ptc-miR162b	POPTR_0016s07580.1|PACid:18250731	3	UCGAUAAACCUCUGCAUCCAG	AT3G11560.2		LETM1-like protein	18.214	1518	1538
			|o.|||||o||||||||||||
			AAUUAUUUCGAGACGUAGGUC
ptc-miR162b	POPTR_0003s14770.1|PACid:18218307	3	UCGAUAAACCUCUGCAUCCA	AT1G64690.1	BLT	branchless trichome	21.038	592	611
			||||.|||||.||o|||||o
			AGCUGUUUGGGGAAGUAGGG
ptc-miR162b	POPTR_0016s00290.1|PACid:18250750	4.5	UCGAUAAACCUCUGCAUCCAG	AT3G52155.1		Phosphoglycerate mutase family protein	12.785	463	483
			oo.||o||||||||||||||.
			CUUUACUUGGAGACGUAGGUU
ptc-miR162b	POPTR_0014s10610.1|PACid:18223893	4.5	UCGAUAAACCUCUGCAUCCAG	AT2G46920.1	POL	Protein phosphatase 2C family protein	19.279	708	728
			oo.|o|||||||||||||||.
			UUUUUUUUGGAGACGUAGGUU
ptc-miR162b	POPTR_0010s14990.1|PACid:18242029	3	UCGAUAAACCUCUGCAUCCAG	AT3G51550.1	FER	Malectin/receptor-like protein kinase family protein	16.861	1762	1782
			|||||||oo|||||o||||||
			AGCUAUUAUGAGACCUAGGUC
ptc-miR162b	POPTR_0011s16860.1|PACid:18231027	3	UCGAUAAACCUCUGCAUCCAG	AT3G51550.1	FER	Malectin/receptor-like protein kinase family protein	13.99	1813	1833
			|||||||oo|||||o||||||
			AGCUAUUAUGAGACCUAGGUC
ptc-miR162b	POPTR_0010s09210.1|PACid:18241482	4	UCGAUAAACCUCUGCAUCCAG	AT3G22830.1	HSFA6B	heat shock transcription factor A6B	11.112	466	486
			|||||o|||o||.o|||||||
			AGCUAGUUGAAGGGGUAGGUC
ptc-miR162b	POPTR_0019s14700.1|PACid:18219909	3.5	UCGAUAAACCUCUGCAUCCAG	AT2G25150.1		HXXXD-type acyl-transferase family protein	18.572	1223	1243
			|||o|||||||o|o||||||.
			AGCGAUUUGGAAAGGUAGGUU
ptc-miR162b	POPTR_0022s00530.1|PACid:18218550	3.5	UCGAUAAACCUCUGCAUCCAG	AT5G49910.1	CPHSC70-2EAT SHOCK PROTEIN 70-2	chloroplast heat shock protein 70-2	17.761	405	425
			.|.||||||||||o||.|o|.
			GGUUAUUUGGAGAAGUGGCUU
ptc-miR162b	POPTR_0004s23310.1|PACid:18226454	3.5	UCGAUAAACCUCUGCAUCCAG	AT5G49910.1	CPHSC70-2EAT SHOCK PROTEIN 70-2	chloroplast heat shock protein 70-2	19.355	585	605
			.|.||||||||||o||.|o|.
			GGUUAUUUGGAGAAGUGGCUU
ptc-miR162b	POPTR_0013s12010.1|PACid:18221243	4.5	UCGAUAAACCUCUGCAUCCAG	AT1G34300.1		lectin protein kinase family protein	21.72	1446	1466
			||oo||||||.||||o|||||
			AGGAAUUUGGGGACGCAGGUC
ptc-miR162b	POPTR_0010s01830.1|PACid:18242184	3.5	UCGAUAAACCUCUGCAUCCAG	AT5G49030.3	OVA2	tRNA synthetase class I (I, L, M and V) family protein	18.347	2587	2607
			|o|||||||||o|||o||||.
			AUCUAUUUGGAAACGGAGGUU
ptc-miR162b	POPTR_0019s11410.1|PACid:18219845	4	UCGAUAAACCUCUGCAUCCA	AT1G77855.1			18.254	536	555
			||o|||||||||.o|||||o
			AGAUAUUUGGAGGAGUAGGA
ptc-miR162b	POPTR_0008s06690.1|PACid:18247561	4	UCGAUAAACCUCUGCAUCCA	AT5G05700.1	ATE1	arginine-tRNA protein transferase 1	11.923	322	341
			||o|.||||||||||||o|o
			AGAUGUUUGGAGACGUAAGA
ptc-miR162b	POPTR_0010s05600.1|PACid:18240609	3.5	UCGAUAAACCUCUGCAUCCA	AT1G70610.1	TAP1	transporter associated with antigen processing protein 1	19.04	307	326
			||||||||o|||.|o||||o
			AGCUAUUUAGAGGCUUAGGA
ptc-miR162b	POPTR_0017s01750.1|PACid:18210129	4	UCGAUAAACCUCUGCAUCCA	AT3G57360.1			21.783	2	21
			.|.||o|o||||.|||||||
			GGUUAGUAGGAGGCGUAGGU
ptc-miR162b	POPTR_0002s09600.1|PACid:18246431	5	UCGAUAAACCUCUGCAUCCA	AT1G78160.1	PUM7	pumilio 7	16.121	1243	1262
			|||||o||||||||||.ooo
			AGCUAGUUGGAGACGUGAUG
ptc-miR164a	POPTR_0011s11600.1|PACid:18232285	1	UGGAGAAGCAGGGCACGUGC	AT5G53950.1	CUC2	NAC (No Apical Meristem) domain transcriptional regulator superfamily protein	19.398	711	730
			|||||||.||||.|||||||
			ACCUCUUUGUCCUGUGCACG
ptc-miR164a	POPTR_0001s40680.1|PACid:18237776	1	UGGAGAAGCAGGGCACGUGC	AT5G53950.1	CUC2	NAC (No Apical Meristem) domain transcriptional regulator superfamily protein	19.075	696	715
			|||||||.||||.|||||||
			ACCUCUUUGUCCUGUGCACG
ptc-miR164a	POPTR_0012s01610.1|PACid:18229362	1.5	UGGAGAAGCAGGGCACGUGC	AT5G61430.1	NAC100	NAC domain containing protein 100	20.01	642	661
			||||||||||||||||||.o
			ACCUCUUCGUCCCGUGCAUC
ptc-miR164a	POPTR_0015s02170.1|PACid:18233200	1.5	UGGAGAAGCAGGGCACGUGC	AT5G61430.1	NAC100	NAC domain containing protein 100	18.84	642	661
			||||||||||||||||||.o
			ACCUCUUCGUCCCGUGCAUC
ptc-miR164a	POPTR_0007s08420.1|PACid:18242696	1	UGGAGAAGCAGGGCACGUGC	AT1G56010.2	NAC1	NAC domain containing protein 1	12.478	606	625
			||||||||||||||||o|||
			ACCUCUUCGUCCCGUGAACG
ptc-miR164a	POPTR_0005s10100.1|PACid:18206764	1	UGGAGAAGCAGGGCACGUGC	AT1G56010.2	NAC1	NAC domain containing protein 1	10.648	447	466
			||||||||||||||||o|||
			ACCUCUUCGUCCCGUGAACG
ptc-miR164a	POPTR_0122s00210.1|PACid:18222158	3	UGGAGAAGCAGGGCACGUGCA	AT1G29750.2	RKF1	receptor-like kinase in flowers 1	15.587	936	956
			||.o|||.|||.|||||||||
			ACUGCUUUGUCUCGUGCACGU
ptc-miR164a	POPTR_0017s03950.1|PACid:18209854	3	UGGAGAAGCAGGG-CACGUGCA	AT2G43890.1		Pectin lyase-like superfamily protein	20.441	156	177
			|||||||||||.|o|||.||||
			ACCUCUUCGUCUCGGUGUACGU
ptc-miR164a	POPTR_0002s07110.1|PACid:18246651	2.5	UGGAGAAGCAGGGCACGUGC	AT5G42140.1		Regulator of chromosome condensation (RCC1) family with FYVE zinc finger domain	17.039	3320	3339
			|.|||||||||.|o||.|||
			AUCUCUUCGUCUCCUGUACG
ptc-miR164a	POPTR_0018s14860.1|PACid:18215691	3	UGGAGAAGCAGGGCACGUGC	AT3G13050.1		Major facilitator superfamily protein	13.967	637	656
			o.|||||||||||||o.|||
			UUCUCUUCGUCCCGUUUACG
ptc-miR164a	POPTR_0010s21420.2|PACid:18241402	3	UGGAGAAGCAGGGCACGUGC	AT2G28760.1	UXS6	UDP-XYL synthase 6	13.824	311	330
			|||||||||||||||o|..o
			ACCUCUUCGUCCCGUUCGUU
ptc-miR164a	POPTR_0010s21420.1|PACid:18241401	3	UGGAGAAGCAGGGCACGUGC	AT2G28760.1	UXS6	UDP-XYL synthase 6	13.824	311	330
			|||||||||||||||o|..o
			ACCUCUUCGUCCCGUUCGUU
ptc-miR164a	POPTR_1855s00205.1|PACid:18205975	3	UGGAGAAGCAGGGCACGUGC	AT3G13050.1		Major facilitator superfamily protein	14.775	55	74
			o.|||||||||||||o.|||
			UUCUCUUCGUCCCGUUUACG
ptc-miR164a	POPTR_0009s08570.1|PACid:18228265	4	UGGAGAAGCAGGGCACGUGCA	AT4G33680.1	AGD2	Pyridoxal phosphate (PLP)-dependent transferases superfamily protein	14.937	124	144
			o||||o|||||o.||||||||
			UCCUCGUCGUCGUGUGCACGU
ptc-miR164a	POPTR_0011s06240.1|PACid:18231924	4	UGGAGAAGCAGGGCACGUGCA	AT1G29750.2	RKF1	receptor-like kinase in flowers 1	15.628	822	842
			||.o|||.|||.|||||o|||
			ACUGCUUUGUCUCGUGCCCGU
ptc-miR164a	POPTR_0012s07150.1|PACid:18229158	3.5	UGGAGAAGCAGGGCACGUGC	AT3G47780.1	ATH6	ABC2 homolog 6	17.053	416	435
			o.|||||.||||.||o||||
			UUCUCUUUGUCCUGUCCACG
ptc-miR164a	POPTR_0006s03450.1|PACid:18212651	4	UGGAGAAGCAGGGCACGUGC	AT3G26040.1		HXXXD-type acyl-transferase family protein	12.231	108	127
			o|.|.|o|||||||||||.|
			UCUUUUGCGUCCCGUGCAUG
ptc-miR164a	POPTR_0018s13530.1|PACid:18214507	4.5	UGGAGAAGCAGGGCACGUGC	AT1G50180.1		NB-ARC domain-containing disease resistance protein	18.935	851	870
			||||.|||||||.|||.o.o
			ACCUUUUCGUCCUGUGUCUA
ptc-miR164a	POPTR_0001s32990.1|PACid:18237627	4	UGGAGAAGCAGGGCACGUGCA	AT3G26790.1	FUS3	AP2/B3-like transcriptional factor family protein	12.163	233	253
			o.||||||oo.||||||||||
			CUCUCUUCCGUCCGUGCACGU
ptc-miR164a	POPTR_0001s29080.1|PACid:18238593	4	UGGAGAAGCAGGGCACGUGCA	AT5G10530.1		Concanavalin A-like lectin protein kinase family protein	12.18	2112	2132
			||o|||||||o||||o.||||
			ACAUCUUCGUACCGUCUACGU
ptc-miR164a	POPTR_0001s29080.2|PACid:18238594	4	UGGAGAAGCAGGGCACGUGCA	AT5G10530.1		Concanavalin A-like lectin protein kinase family protein	12.18	2022	2042
			||o|||||||o||||o.||||
			ACAUCUUCGUACCGUCUACGU
ptc-miR164a	POPTR_0001s29050.1|PACid:18237140	4	UGGAGAAGCAGGGCACGUGCA	AT5G10530.1		Concanavalin A-like lectin protein kinase family protein	12.498	1797	1817
			||o|||||||o||||o.||||
			ACAUCUUCGUACCGUCUACGU
ptc-miR164a	POPTR_0009s10190.1|PACid:18227437	4	UGGAGAAGCAGGGCACGUGC	AT2G15490.3	UGT73B4	UDP-glycosyltransferase 73B4	14.967	135	154
			||||||||o|.|||||.|oo
			ACCUCUUCUUUCCGUGUAAA
ptc-miR164a	POPTR_0016s01750.1|PACid:18250955	4	UGGAGAAGCAGGGCACGUGCA	AT1G07250.1	UGT71C4	UDP-glucosyl transferase 71C4	16.112	518	538
			||.|.||.|||||o||.|o||
			ACUUUUUUGUCCCUUGUAAGU
ptc-miR164d	POPTR_0011s11600.1|PACid:18232285	1	UGGAGAAGCAGGGCACGUGC	AT5G53950.1	CUC2	NAC (No Apical Meristem) domain transcriptional regulator superfamily protein	19.398	711	730
			|||||||.||||.|||||||
			ACCUCUUUGUCCUGUGCACG
ptc-miR164d	POPTR_0001s40680.1|PACid:18237776	1	UGGAGAAGCAGGGCACGUGC	AT5G53950.1	CUC2	NAC (No Apical Meristem) domain transcriptional regulator superfamily protein	19.075	696	715
			|||||||.||||.|||||||
			ACCUCUUUGUCCUGUGCACG
ptc-miR164d	POPTR_0012s01610.1|PACid:18229362	1.5	UGGAGAAGCAGGGCACGUGC	AT5G61430.1	NAC100	NAC domain containing protein 100	20.01	642	661
			||||||||||||||||||.o
			ACCUCUUCGUCCCGUGCAUC
ptc-miR164d	POPTR_0015s02170.1|PACid:18233200	1.5	UGGAGAAGCAGGGCACGUGC	AT5G61430.1	NAC100	NAC domain containing protein 100	18.84	642	661
			||||||||||||||||||.o
			ACCUCUUCGUCCCGUGCAUC
ptc-miR164d	POPTR_0007s08420.1|PACid:18242696	1	UGGAGAAGCAGGGCACGUGC	AT1G56010.2	NAC1	NAC domain containing protein 1	12.478	606	625
			||||||||||||||||o|||
			ACCUCUUCGUCCCGUGAACG
ptc-miR164d	POPTR_0005s10100.1|PACid:18206764	1	UGGAGAAGCAGGGCACGUGC	AT1G56010.2	NAC1	NAC domain containing protein 1	10.648	447	466
			||||||||||||||||o|||
			ACCUCUUCGUCCCGUGAACG
ptc-miR164d	POPTR_0122s00210.1|PACid:18222158	3	UGGAGAAGCAGGGCACGUGCA	AT1G29750.2	RKF1	receptor-like kinase in flowers 1	15.587	936	956
			||.o|||.|||.|||||||||
			ACUGCUUUGUCUCGUGCACGU
ptc-miR164d	POPTR_0017s03950.1|PACid:18209854	3	UGGAGAAGCAGGG-CACGUGCA	AT2G43890.1		Pectin lyase-like superfamily protein	20.441	156	177
			|||||||||||.|o|||.||||
			ACCUCUUCGUCUCGGUGUACGU
ptc-miR164d	POPTR_0002s07110.1|PACid:18246651	2.5	UGGAGAAGCAGGGCACGUGC	AT5G42140.1		Regulator of chromosome condensation (RCC1) family with FYVE zinc finger domain	17.039	3320	3339
			|.|||||||||.|o||.|||
			AUCUCUUCGUCUCCUGUACG
ptc-miR164d	POPTR_0018s14860.1|PACid:18215691	3	UGGAGAAGCAGGGCACGUGC	AT3G13050.1		Major facilitator superfamily protein	13.967	637	656
			o.|||||||||||||o.|||
			UUCUCUUCGUCCCGUUUACG
ptc-miR164d	POPTR_0010s21420.2|PACid:18241402	3	UGGAGAAGCAGGGCACGUGC	AT2G28760.1	UXS6	UDP-XYL synthase 6	13.824	311	330
			|||||||||||||||o|..o
			ACCUCUUCGUCCCGUUCGUU
ptc-miR164d	POPTR_0010s21420.1|PACid:18241401	3	UGGAGAAGCAGGGCACGUGC	AT2G28760.1	UXS6	UDP-XYL synthase 6	13.824	311	330
			|||||||||||||||o|..o
			ACCUCUUCGUCCCGUUCGUU
ptc-miR164d	POPTR_1855s00205.1|PACid:18205975	3	UGGAGAAGCAGGGCACGUGC	AT3G13050.1		Major facilitator superfamily protein	14.775	55	74
			o.|||||||||||||o.|||
			UUCUCUUCGUCCCGUUUACG
ptc-miR164d	POPTR_0009s08570.1|PACid:18228265	4	UGGAGAAGCAGGGCACGUGCA	AT4G33680.1	AGD2	Pyridoxal phosphate (PLP)-dependent transferases superfamily protein	14.937	124	144
			o||||o|||||o.||||||||
			UCCUCGUCGUCGUGUGCACGU
ptc-miR164d	POPTR_0011s06240.1|PACid:18231924	4	UGGAGAAGCAGGGCACGUGCA	AT1G29750.2	RKF1	receptor-like kinase in flowers 1	15.628	822	842
			||.o|||.|||.|||||o|||
			ACUGCUUUGUCUCGUGCCCGU
ptc-miR164d	POPTR_0012s07150.1|PACid:18229158	3.5	UGGAGAAGCAGGGCACGUGC	AT3G47780.1	ATH6	ABC2 homolog 6	17.053	416	435
			o.|||||.||||.||o||||
			UUCUCUUUGUCCUGUCCACG
ptc-miR164d	POPTR_0006s03450.1|PACid:18212651	4	UGGAGAAGCAGGGCACGUGC	AT3G26040.1		HXXXD-type acyl-transferase family protein	12.231	108	127
			o|.|.|o|||||||||||.|
			UCUUUUGCGUCCCGUGCAUG
ptc-miR164d	POPTR_0018s13530.1|PACid:18214507	4.5	UGGAGAAGCAGGGCACGUGC	AT1G50180.1		NB-ARC domain-containing disease resistance protein	18.935	851	870
			||||.|||||||.|||.o.o
			ACCUUUUCGUCCUGUGUCUA
ptc-miR164d	POPTR_0001s32990.1|PACid:18237627	4	UGGAGAAGCAGGGCACGUGCA	AT3G26790.1	FUS3	AP2/B3-like transcriptional factor family protein	12.163	233	253
			o.||||||oo.||||||||||
			CUCUCUUCCGUCCGUGCACGU
ptc-miR164d	POPTR_0001s29080.1|PACid:18238593	4	UGGAGAAGCAGGGCACGUGCA	AT5G10530.1		Concanavalin A-like lectin protein kinase family protein	12.18	2112	2132
			||o|||||||o||||o.||||
			ACAUCUUCGUACCGUCUACGU
ptc-miR164d	POPTR_0001s29080.2|PACid:18238594	4	UGGAGAAGCAGGGCACGUGCA	AT5G10530.1		Concanavalin A-like lectin protein kinase family protein	12.18	2022	2042
			||o|||||||o||||o.||||
			ACAUCUUCGUACCGUCUACGU
ptc-miR164d	POPTR_0001s29050.1|PACid:18237140	4	UGGAGAAGCAGGGCACGUGCA	AT5G10530.1		Concanavalin A-like lectin protein kinase family protein	12.498	1797	1817
			||o|||||||o||||o.||||
			ACAUCUUCGUACCGUCUACGU
ptc-miR164d	POPTR_0009s10190.1|PACid:18227437	4	UGGAGAAGCAGGGCACGUGC	AT2G15490.3	UGT73B4	UDP-glycosyltransferase 73B4	14.967	135	154
			||||||||o|.|||||.|oo
			ACCUCUUCUUUCCGUGUAAA
ptc-miR164d	POPTR_0016s01750.1|PACid:18250955	4	UGGAGAAGCAGGGCACGUGCA	AT1G07250.1	UGT71C4	UDP-glucosyl transferase 71C4	16.112	518	538
			||.|.||.|||||o||.|o||
			ACUUUUUUGUCCCUUGUAAGU
ptc-miR166a	POPTR_0003s04860.1|PACid:18216482	1.5	UCGGACCAGGCUUCAUUCCC	AT1G52150.1	ATHB-15	Homeobox-leucine zipper family protein / lipid-binding START domain-containing protein	23.209	552	571
			.||||||||||||||||||o
			GGCCUGGUCCGAAGUAAGGU
ptc-miR166a	POPTR_0004s22090.1|PACid:18226209	1.5	UCGGACCAGGCUUCAUUCCC	AT5G60690.1	REV	Homeobox-leucine zipper family protein / lipid-binding START domain-containing protein	21.25	552	571
			.||||||||||||||||||o
			GGCCUGGUCCGAAGUAAGGU
ptc-miR166a	POPTR_0001s18930.1|PACid:18234341	1.5	UCGGACCAGGCUUCAUUCCC	AT1G52150.1	ATHB-15	Homeobox-leucine zipper family protein / lipid-binding START domain-containing protein	21.919	555	574
			.||||||||||||||||||o
			GGCCUGGUCCGAAGUAAGGU
ptc-miR166a	POPTR_0018s08110.1|PACid:18215654	2	UCGGACCAGGCUUCAUUCCC	AT4G32880.1	HB-8	homeobox gene 8	22.71	519	538
			.|||||||||||||||.||o
			GGCCUGGUCCGAAGUAGGGU
ptc-miR166a	POPTR_0006s25390.1|PACid:18212504	2	UCGGACCAGGCUUCAUUCCC	AT4G32880.1	HB-8	homeobox gene 8	22.483	519	538
			.|||||||||||||||.||o
			GGCCUGGUCCGAAGUAGGGU
ptc-miR166a	POPTR_0009s01990.2|PACid:18228472	2	UCGGACCAGGCUUCAUUCCC	AT5G60690.1	REV	Homeobox-leucine zipper family protein / lipid-binding START domain-containing protein	23.993	564	583
			.|||||||||||||||.||o
			GGCCUGGUCCGAAGUAGGGU
ptc-miR166a	POPTR_0009s01990.1|PACid:18228471	2	UCGGACCAGGCUUCAUUCCC	AT5G60690.1	REV	Homeobox-leucine zipper family protein / lipid-binding START domain-containing protein	23.993	564	583
			.|||||||||||||||.||o
			GGCCUGGUCCGAAGUAGGGU
ptc-miR166a	POPTR_0001s38120.1|PACid:18238509	2.5	UCGGACCAGGCUUCAUUCCC	AT2G34710.1	PHB	Homeobox-leucine zipper family protein / lipid-binding START domain-containing protein	18.935	564	583
			.|||||||||||||||o||o
			GGCCUGGUCCGAAGUAUGGU
ptc-miR166a	POPTR_0004s04900.1|PACid:18226512	3	UCGGACCAGGCUUCAUUCCC	AT4G28500.1	NAC073	NAC domain containing protein 73	19.418	189	208
			|||||o||..|||||.||||
			AGCCUAGUUUGAAGUGAGGG
ptc-miR166a	POPTR_0011s10070.1|PACid:18230807	4	UCGGACCAGGCUUCAUUCCC	AT2G34710.1	PHB	Homeobox-leucine zipper family protein / lipid-binding START domain-containing protein	22.435	564	583
			.o||||||||||||||.||o
			GACCUGGUCCGAAGUAGGGU
ptc-miR166a	POPTR_0904s00200.1|PACid:18214042	4.5	UCGGACCAGGCUUCAUUCCCC	AT5G43330.1		Lactate/malate dehydrogenase family protein	16.963	11	31
			.o||||||.||o|||.|||||
			GUCCUGGUUCGUAGUGAGGGG
ptc-miR166a	POPTR_0010s08180.1|PACid:18240143	4.5	UCGGACCAGGCUUCAUUCCCC	AT5G43330.1		Lactate/malate dehydrogenase family protein	16.963	11	31
			.o||||||.||o|||.|||||
			GUCCUGGUUCGUAGUGAGGGG
ptc-miR166a	POPTR_0008s16670.1|PACid:18249836	4.5	UCGGACCAGGCUUCAUUCCCC	AT5G43330.1		Lactate/malate dehydrogenase family protein	23.386	80	100
			.o||||||.||o|||.|||||
			GUCCUGGUUCGUAGUGAGGGG
ptc-miR166a	POPTR_0018s09290.1|PACid:18215006	3.5	UCGGACCAGGCUUCAUUCCC	AT2G20010.2		Protein of unknown function (DUF810)	22.315	273	292
			|o|.|||||.|.||||.|||
			AUCUUGGUCUGGAGUAGGGG
ptc-miR166a	POPTR_0016s06620.1|PACid:18251001	4	UCGGACCAGGCUUCAUUCCCC	AT5G06530.1		ABC-2 type transporter family protein	18.484	2213	2233
			o||o||||.|||||||||o||
			UGCGUGGUUCGAAGUAAGAGG
ptc-miR166a	POPTR_0011s13510.1|PACid:18231824	4	UCGGACCAGGCUUCAUUCCC	AT5G54650.1	Fh5	formin homology5	17.884	1389	1408
			oo||||||||o||||.||||
			CACCUGGUCCAAAGUGAGGG
ptc-miR166a	POPTR_0001s04110.1|PACid:18235265	3.5	UCGGACCAGGCUUCAUUCCCC	AT1G55350.1	DEK1	calpain-type cysteine protease family	15.814	5754	5774
			||.|||||.|o|.||||||o|
			AGUCUGGUUCCAGGUAAGGUG
ptc-miR166a	POPTR_0017s04800.1|PACid:18209236	4	UCGGACCAGGCUUCAUUCCC	AT4G28500.1	NAC073	NAC domain containing protein 73	22.615	183	202
			|||||o||..|||||.|||o
			AGCCUAGUUUGAAGUGAGGC
ptc-miR166a	POPTR_0011s15540.1|PACid:18230629	3.5	UCGGACCAGGCUUCAUUCCC	AT1G32900.1		UDP-Glycosyltransferase superfamily protein	20.685	1690	1709
			|||||o|o.||||||.||||
			AGCCUCGGUCGAAGUGAGGG
ptc-miR166a	POPTR_0003s09470.1|PACid:18217599	3.5	UCGGACCAGGCUUCAUUCCC	AT5G46880.1	HB-7	homeobox-7	18.739	37	56
			||.|||o||.||o|||||||
			AGUCUGCUCUGAUGUAAGGG
ptc-miR166a	POPTR_0014s18590.1|PACid:18223568	4	UCGGACCAGGCUUCAUUCCC	AT5G43920.1		transducin family protein / WD-40 repeat family protein	15.591	256	275
			o|..||||..||||||||o|
			UGUUUGGUUUGAAGUAAGAG
ptc-miR166a	POPTR_0001s12750.1|PACid:18235859	4	UCGGACCAGGCUUCAUUCCC	AT3G26935.1		DHHC-type zinc finger family protein	24.631	1230	1249
			.|..||||||o|.||||||o
			GGUUUGGUCCAAGGUAAGGU
ptc-miR166b	POPTR_0003s04860.1|PACid:18216482	1.5	UCGGACCAGGCUUCAUUCCC	AT1G52150.1	ATHB-15	Homeobox-leucine zipper family protein / lipid-binding START domain-containing protein	23.209	552	571
			.||||||||||||||||||o
			GGCCUGGUCCGAAGUAAGGU
ptc-miR166b	POPTR_0004s22090.1|PACid:18226209	1.5	UCGGACCAGGCUUCAUUCCC	AT5G60690.1	REV	Homeobox-leucine zipper family protein / lipid-binding START domain-containing protein	21.25	552	571
			.||||||||||||||||||o
			GGCCUGGUCCGAAGUAAGGU
ptc-miR166b	POPTR_0001s18930.1|PACid:18234341	1.5	UCGGACCAGGCUUCAUUCCC	AT1G52150.1	ATHB-15	Homeobox-leucine zipper family protein / lipid-binding START domain-containing protein	21.919	555	574
[truncated: 8,480 more rows]
